# Supplementary material for: Enantioselective insertion of vinyl diazoacetates into O–H bonds of carboxylic acids
Source: Royal Society of Chemistry journal article supplement (doi:10.1039/d4nj00289j), 2024-01-01
Supplement: d4nj00289j1.pdf [file d4nj00289j1.pdf]

## Supporting Information

### **Enantioselective Insertion of Vinyl Diazoacetates into O-H Bonds of Carboxylic Acids**

Jiawei Chen,<sup>a</sup> Ying Shao,<sup>a,\*</sup> Shengbiao Tang<sup>a</sup> and Jiangtao Sun<sup>a,\*</sup>

Jiangsu Key Laboratory of Advanced Catalytic Materials & Technology, School of Petrochemical Engineering, Changzhou University, Changzhou 213164, China.

E-mail: yingshao@cczu.edu.cn; jtsun@cczu.edu.cn

## **Table of Conten**

- 1 General information**
- 2 Preparation of substrates**
- 3 Experimental Procedures**
- 4 Optimization of the reaction conditions**
- 5 Analytic Data for Synthesized Compounds**
- 6 Further Transformation**
- 7 X-ray crystallographic data**
- 8 References**

## 1. General information

Unless otherwise stated, all reactions were carried out in dry reaction tubes under an argon atmosphere. Solvents were dried prior to use. Commercially obtained reagents were used as received. Reactions were monitored by analytical thin-layer chromatography (TLC) using pre-coated (0.20 mm thickness) silica gel plates with F<sub>254</sub> indicator. Visualization of spots after TLC was accomplished by exposure to UV light (254 nm) and/or staining agents (iodine vapor, KMnO<sub>4</sub> in water). For column chromatography, 200-300 mesh silica gel was used. NMR spectra were recorded on Bruker AVANCE III 400 MHz (400 MHz for <sup>1</sup>H NMR, 100 MHz for <sup>13</sup>C NMR, 376 MHz for <sup>19</sup>F NMR) spectrometer using residual solvent peaks as the internal standard (CDCl<sub>3</sub>: 7.26 ppm for <sup>1</sup>H NMR, 77.16 ppm for <sup>13</sup>C NMR; DMSO-d<sub>6</sub>: 2.50 ppm for <sup>1</sup>H NMR, 39.52 ppm for <sup>13</sup>C NMR). Data for <sup>1</sup>H NMR spectra were reported as follows: chemical shift ( $\delta$  ppm), multiplicity (s = singlet, d = doublet, t = triplet, q = quartet, dd = doublet of doublets, td = triplet of doublets, m = multiplet), coupling constants *J* in Hertz (Hz), and integration. Data for <sup>13</sup>C NMR spectra were reported in terms of chemical shift ( $\delta$  ppm). High resolution mass spectra (HRMS) were performed on Agilent 6540 Q-TOF or Agilent 6230A TOF mass spectrometer (ESI). Melting points were uncorrected and determined on a SGW X-4B melting point apparatus. Enantiomeric excesses (ee) values were determined by chiral HPLC analysis using an Agilent 1260 LC instrument on Daicel Chiralpak IA, IB, IC, ID, IE or OD-H column. Optical rotations were determined on a Rudolph Autopol I automatic polarimeter and reported as follows:  $[\alpha]_D^T$ : (c: g/100 mL, solvent).

All chiral phosphoric acids are commercial products and are produced by the company DAICEL.

## 2. Preparation of substrates

The Carboxylic acid compounds **1** were purchased from Energy Chemical and Bide Pharmatech Ltd.

The diazo compounds **2** were prepared according to literature procedures<sup>[1]</sup>. methyl (*E*)-4-(4-(tert-butyl)phenyl)-2-diazobut-3-enoate was new compound.

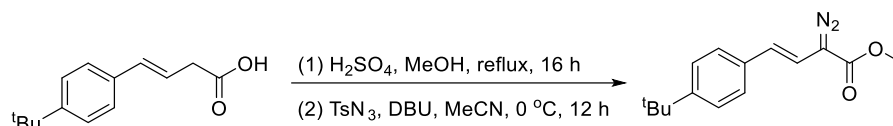

Step 1: A solution of (*E*)-4-(4-(tert-butyl)phenyl)but-3-enoic acid (2.0 g, 9.17 mmol, 1.0 equiv), in MeOH (20.0 mL), then added a drop H<sub>2</sub>SO<sub>4</sub>. The reaction was stirred at 100 °C for 16 hours. The reaction mixture was concentrated under vacuum to give crude methyl (*E*)-4-(4-(tert-butyl)phenyl)but-3-enoate as a yellow oil (1.5 g, 70%), which was used without further purification. Step 2: DBU (1.1 g, 6.9 mmol, 1.6 equiv) and methyl (*E*)-4-(4-(tert-butyl)phenyl)but-3-enoate (1.0 g, 4.3 mmol, 1.0 equiv) were added to a solution of TsN<sub>3</sub> (1.3 g, 6.5 mmol, 1.5 equiv) in CH<sub>3</sub>CN (20 mL) at 0 °C and the resulting mixture was stirred for 1 hours. The reaction mixture was then diluted with distilled water (20 mL) and extracted with EtOAc (20 mL\*3). The combined organic layers were washed with brine (20 mL\*2), then dried over Na<sub>2</sub>SO<sub>4</sub>, and concentrated under reduced pressure. The residue was purified by column chromatography on silica gel (Petroleum ether/ EtOAc = 100:1) to give **2f** as a red solid (0.8 g, 73%), mp: 66-67 °C.

**R<sub>f</sub>** (Petroleum ether/ EtOAc = 20:1) = 0.6.

**<sup>1</sup>H NMR** (400 MHz, Chloroform-*d*) δ 7.33 – 7.26 (m, 4H), 6.42 (d, *J* = 16.4 Hz, 1H), 6.16 (d, *J* = 16.4 Hz, 1H), 3.81 (s, 3H), 1.30 (s, 9H).

**<sup>13</sup>C NMR** (101 MHz, Chloroform-*d*) δ 165.8, 150.3, 134.1, 125.9, 125.7, 125.5, 123.1, 110.2, 52.3, 34.6, 31.3.

**HRMS(ESI)** *m/z*: [M+H]<sup>+</sup> Calculated for C<sub>15</sub>H<sub>19</sub>N<sub>2</sub>O<sub>2</sub> 259.1441; Found 259.1441.

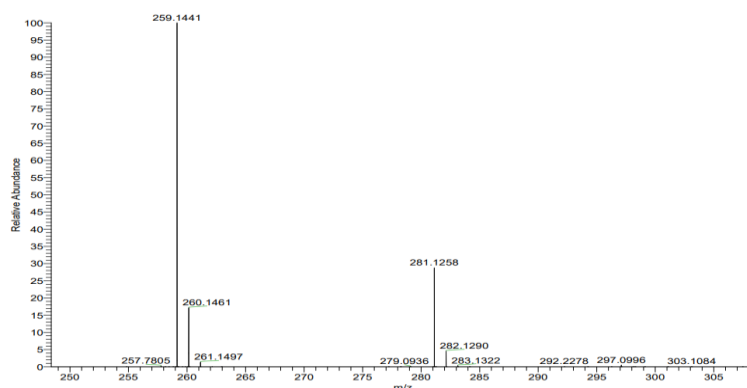

### 3. Experimental Procedures

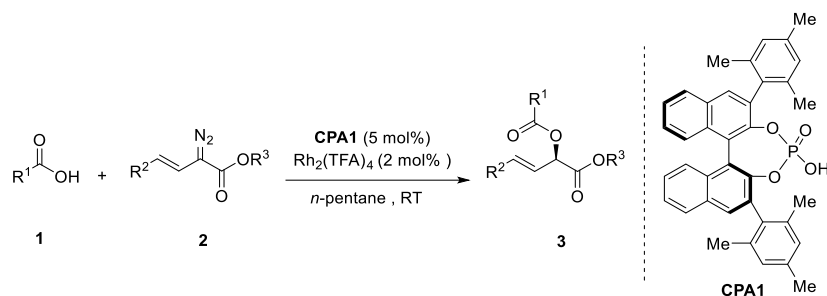

To a dry reaction tube were added  $\text{Rh}_2(\text{TFA})_4$  (2.6 mg, 0.004 mmol, 2 mol%), CPA1 (5.8 mg, 0.01 mmol, 5 mol%), **1** (0.2 mmol) and *n*-pentane (2 mL) under argon atmosphere. Then, a solution of **2** (0.4 mmol) in *n*-pentane (2 mL) was added via syringe, the resulting reaction was stirred at rt for 5 min. The reaction solution was concentrated under vacuum; the crude residue was purified by silica gel column chromatography to give **3**. [Note: The racemic sample was prepared via general procedure without adding CPA1.]

### 4. Table S1 Optimization of the reaction conditions<sup>a</sup>

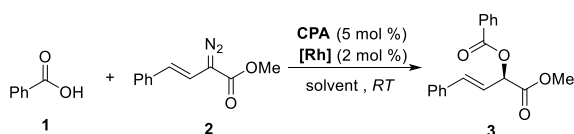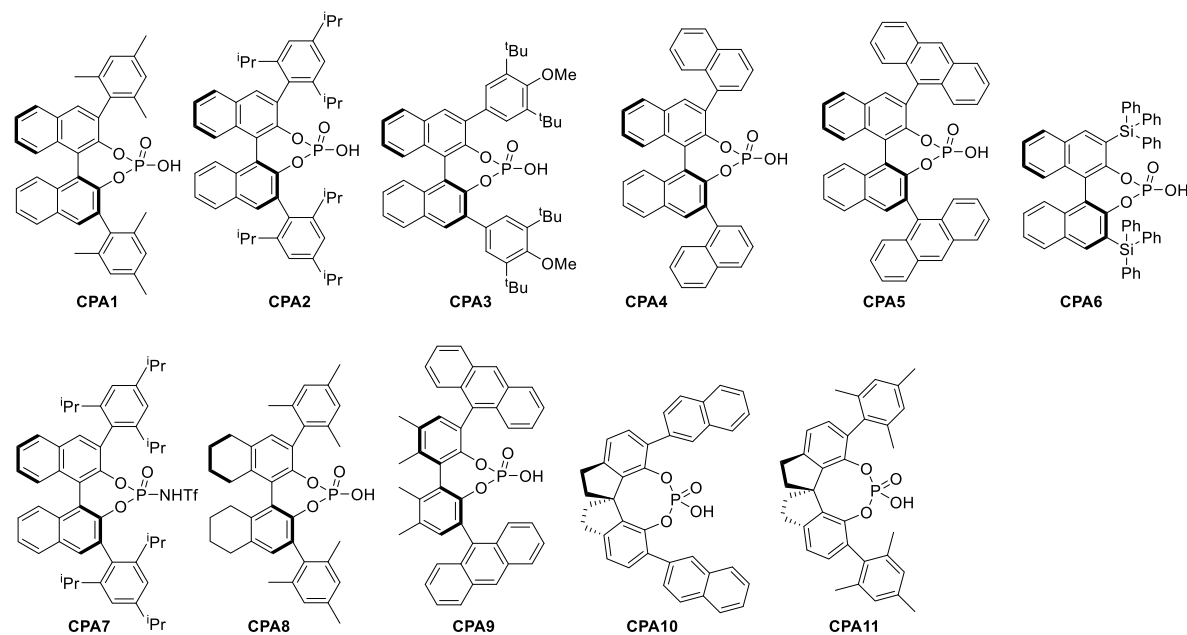

| entry | [Rh]                        | CPA  | solvent           | T (°C) | yield (%) <sup>b</sup> | ee (%) <sup>c</sup> |
|-------|-----------------------------|------|-------------------|--------|------------------------|---------------------|
| 1     | $\text{Rh}_2(\text{TFA})_4$ | CPA1 | <i>n</i> -pentane | 25     | 88                     | 94                  |
| 2     | $\text{Rh}_2(\text{TFA})_4$ | CPA2 | <i>n</i> -pentane | 25     | 59                     | 86                  |
| 3     | $\text{Rh}_2(\text{TFA})_4$ | CPA3 | <i>n</i> -pentane | 25     | 50                     | 9                   |
| 4     | $\text{Rh}_2(\text{TFA})_4$ | CPA4 | <i>n</i> -pentane | 25     | 35                     | 45                  |
| 5     | $\text{Rh}_2(\text{TFA})_4$ | CPA5 | <i>n</i> -pentane | 25     | 32                     | 34                  |
| 6     | $\text{Rh}_2(\text{TFA})_4$ | CPA6 | <i>n</i> -pentane | 25     | 32                     | 0                   |
| 7     | $\text{Rh}_2(\text{TFA})_4$ | CPA7 | <i>n</i> -pentane | 25     | 35                     | 0                   |
| 8     | $\text{Rh}_2(\text{TFA})_4$ | CPA8 | <i>n</i> -pentane | 25     | 78                     | 87                  |

|                 |                                     |       |                   |    |    |    |
|-----------------|-------------------------------------|-------|-------------------|----|----|----|
| 9               | Rh <sub>2</sub> (TFA) <sub>4</sub>  | CPA9  | <i>n</i> -pentane | 25 | 48 | 27 |
| 10              | Rh <sub>2</sub> (TFA) <sub>4</sub>  | CPA10 | <i>n</i> -pentane | 25 | 41 | 19 |
| 11              | Rh <sub>2</sub> (TFA) <sub>4</sub>  | CPA11 | <i>n</i> -pentane | 25 | 61 | 85 |
| 12              | Rh <sub>2</sub> (esp) <sub>4</sub>  | CPA1  | <i>n</i> -pentane | 25 | 35 | 86 |
| 13              | Rh <sub>2</sub> (PTTL) <sub>4</sub> | CPA1  | <i>n</i> -pentane | 25 | 47 | 78 |
| 14              | Rh <sub>2</sub> (Oct) <sub>4</sub>  | CPA1  | <i>n</i> -pentane | 25 | 70 | 91 |
| 15              | Rh <sub>2</sub> (TFA) <sub>4</sub>  | CPA1  | DCM               | 25 | 70 | 23 |
| 16              | Rh <sub>2</sub> (TFA) <sub>4</sub>  | CPA1  | DCE               | 25 | 73 | 44 |
| 17              | Rh <sub>2</sub> (TFA) <sub>4</sub>  | CPA1  | toluene           | 25 | 80 | 45 |
| 18              | Rh <sub>2</sub> (TFA) <sub>4</sub>  | CPA1  | CHCl <sub>3</sub> | 25 | 72 | 58 |
| 19              | Rh <sub>2</sub> (TFA) <sub>4</sub>  | CPA1  | <i>n</i> -pentane | 0  | 52 | 95 |
| 20              | Rh <sub>2</sub> (TFA) <sub>4</sub>  | CPA1  | <i>n</i> -pentane | 15 | 86 | 94 |
| 21              | Rh <sub>2</sub> (TFA) <sub>4</sub>  | CPA1  | <i>n</i> -pentane | 35 | 90 | 92 |
| 22 <sup>e</sup> | Rh <sub>2</sub> (TFA) <sub>4</sub>  | CPA1  | <i>n</i> -pentane | 25 | 80 | 94 |

<sup>a</sup> Reaction conditions: [Rh] (2 mol %), CPA (5 mol %), **1** (0.2 mmol, 1 equiv), **2** (0.4 mmol, 2 equiv) in solvent (4 mL) for 5 min. <sup>b</sup> Isolated yield. <sup>c</sup> ee value was determined by chiral HPLC. <sup>e</sup> **1** (0.2 mmol, 1 equiv), **2** (0.3 mmol, 1.5 equiv).

## 5. Analytic Data for Synthesized Compounds

### (*R,E*)-1-methoxy-1-oxo-4-phenylbut-3-en-2-yl benzoate<sup>[2]</sup> (**3aa**)

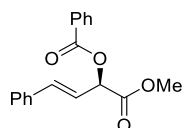

Prepared according to general procedure from Rh<sub>2</sub>(TFA)<sub>4</sub> (2.6 mg, 0.004 mmol, 2 mol%), CPA1 (5.8 mg, 0.01 mmol, 5 mol%), benzoic acid (24.4 mg, 0.2 mmol, 1.0 equiv) and methyl (*E*)-2-diazo-4-phenylbut-3-enoate (80.8 mg, 0.4 mmol, 2.0 equiv) in *n*-pentane (4 mL) at rt for 5 min. The desired product was purified by silica gel column chromatography (Petroleum ether: ethyl acetate = 20:1-5:1) and obtained as colorless oil (52.1 mg, 88%).

**R<sub>f</sub>** (Petroleum ether/ EtOAc = 20:1) = 0.3.

**HPLC** (IA, *i*-PrOH/*n*-hexane = 10/90, flow rate = 1 mL/min, λ = 215 nm) t<sub>R</sub> = 7.931 min (major), 8.568 min (minor), 94% ee.

[α]<sub>D</sub><sup>25</sup>: -85.500 (c = 0.2, CH<sub>2</sub>Cl<sub>2</sub>).

**<sup>1</sup>H NMR** (400 MHz, Chloroform-*d*) δ 8.16-8.13 (m, 2H), 7.62-7.57 (m, 1H), 7.49-7.43 (m, 4H), 7.37-7.29 (m, 3H), 6.91 (d, *J* = 17.2 Hz, 1H), 6.40 (dd, *J* = 16.0, 7.2 Hz, 1H), 5.88 (dd, *J* = 7.2, 1.2 Hz, 1H), 3.81 (s, 3H).

**<sup>13</sup>C NMR** (101 MHz, Chloroform-*d*) δ 169.2, 165.7, 135.6, 135.5, 133.5, 130.0, 129.3, 128.7, 128.7, 128.5, 126.9, 120.9, 73.6, 52.8.

### (*R,E*)-1-ethoxy-1-oxo-4-phenylbut-3-en-2-yl benzoate<sup>[4]</sup> (**3ab**)

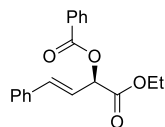

Prepared according to general procedure from Rh<sub>2</sub>(TFA)<sub>4</sub> (2.6 mg, 0.004 mmol, 2 mol%), CPA1 (5.8 mg, 0.01 mmol, 5 mol%), benzoic acid (24.4 mg, 0.2 mmol, 1.0 equiv) and ethyl (*E*)-2-diazo-4-phenylbut-3-enoate (86.4 mg, 0.4 mmol, 2.0 equiv) in *n*-pentane (4 mL) at rt for 5 min. The desired product was purified by silica gel column chromatography (Petroleum ether: ethyl acetate = 20:1-

5:1) and obtained as yellow oil (49.0 mg, 79%).

$R_f$  (Petroleum ether/ EtOAc = 20:1) = 0.3.

**HPLC** (IA, *i*-PrOH/*n*-hexane = 10/90, flow rate = 1 mL/min,  $\lambda$  = 215 nm)  $t_R$  = 7.310 min (major), 8.043 min (minor), 94% ee.

$[\alpha]_D^{25}$ : -59.900 (c = 0.2, CH<sub>2</sub>Cl<sub>2</sub>).

**<sup>1</sup>H NMR** (400 MHz, Chloroform-*d*)  $\delta$  8.16-8.13 (m, 2H), 7.62-7.58 (m, 1H), 7.50-7.43 (m, 4H), 7.38-7.30 (m, 3H), 6.92 (dd,  $J$  = 16.0, 1.2 Hz, 1H), 6.41 (dd,  $J$  = 16.0, 7. Hz, 1H), 5.85 (dd,  $J$  = 7.2, 1.2 Hz, 1H), 4.27 (m, 2H), 1.30 (t,  $J$  = 7.2 Hz, 3H).

**<sup>13</sup>C NMR** (101 MHz, Chloroform-*d*)  $\delta$  168.7, 165.8, 135.7, 135.3, 133.5, 130.0, 129.4, 128.7, 128.6, 128.5, 126.9, 121.1, 73.7, 61.9, 14.2.

### (*R,E*)-1-isopropoxy-1-oxo-4-phenylbut-3-en-2-yl benzoate (**3ac**)

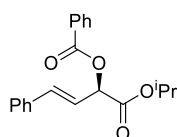

Prepared according to general procedure from Rh<sub>2</sub>(TFA)<sub>4</sub> (2.6 mg, 0.004 mmol, 2 mol%), CPA1 (5.8 mg, 0.01 mmol, 5 mol%), benzoic acid (24.4 mg, 0.2 mmol, 1.0 equiv) and isopropyl (*E*)-2-diazo-4-phenylbut-3-enoate (92.0 mg, 0.4 mmol, 2.0 equiv) in *n*-pentane (4 mL) at rt for 5 min. The desired product was purified by silica gel column chromatography (Petroleum ether: ethyl acetate = 20:1-5:1) and obtained as colorless oil (47.4 mg, 73%).

$R_f$  (Petroleum ether/ EtOAc = 20:1) = 0.3.

**HPLC** (IA, *i*-PrOH/*n*-hexane = 1/99, flow rate = 1 mL/min,  $\lambda$  = 215 nm)  $t_R$  = 11.114 min (major), 12.474 min (minor), 96% ee.

$[\alpha]_D^{25}$ : -53.400 (c = 0.2, CH<sub>2</sub>Cl<sub>2</sub>).

**<sup>1</sup>H NMR** (400 MHz, Chloroform-*d*)  $\delta$  8.16-8.13 (m, 2H), 7.61-7.57 (m, 1H), 7.50-7.41 (m, 4H), 7.38-7.27 (m, 3H), 6.91 (d,  $J$  = 16.0 Hz, 1H), 6.40 (dd,  $J$  = 16.0, 6.8 Hz, 1H), 5.81 (dd,  $J$  = 6.8, 1.2 Hz, 1H), 5.12 (m, 1H), 1.31 (d,  $J$  = 6.4 Hz, 3H), 1.25 (d,  $J$  = 6.0 Hz, 3H).

**<sup>13</sup>C NMR** (101 MHz, Chloroform-*d*)  $\delta$  168.3, 165.8, 135.8, 135.2, 133.5, 130.0, 129.5, 128.8, 128.6, 128.6, 127.0, 121.3, 73.9, 69.7, 21.8, 21.7.

**HRMS(ESI)**  $m/z$ : [M+H]<sup>+</sup> Calculated for C<sub>20</sub>H<sub>20</sub>O<sub>4</sub> 325.1434; Found 325.1431.

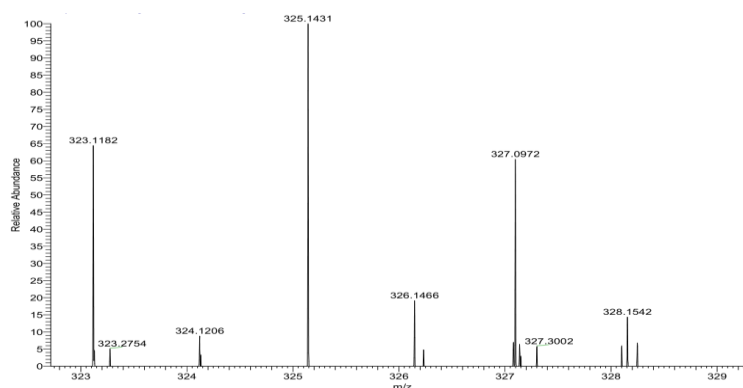

### (*R,E*)-1-(*tert*-butoxy)-1-oxo-4-phenylbut-3-en-2-yl benzoate (**3ad**)

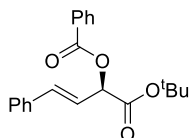

Prepared according to general procedure from  $\text{Rh}_2(\text{TFA})_4$  (2.6 mg, 0.004 mmol, 2 mol%), CPA1 (5.8 mg, 0.01 mmol, 5 mol%), benzoic acid (24.4 mg, 0.2 mmol, 1.0 equiv) and tert-butyl (*E*)-2-diazo-4-phenylbut-3-enoate (97.6 mg, 0.4 mmol, 2.0 equiv) in *n*-pentane (4 mL) at rt for 5 min. The desired product was purified by silica gel column chromatography (Petroleum ether: ethyl acetate = 20:1-5:1) and obtained as white solid (53.5 mg, 79%), mp: 93-94 °C.

$R_f$  (Petroleum ether/ EtOAc = 20:1) = 0.3.

**HPLC** (IE, *i*-PrOH/*n*-hexane = 1/99, flow rate = 1 mL/min,  $\lambda$  = 215 nm)  $t_R$  = 14.008 min (major), 11.925 min (minor), 97% ee.

$[\alpha]_D^{25}$ : -43.100 ( $c$  = 0.2,  $\text{CH}_2\text{Cl}_2$ ).

**$^1\text{H}$  NMR** (400 MHz, Chloroform-*d*)  $\delta$  8.09-8.06 (m, 2H), 7.53-7.48 (m, 1H), 7.41-7.36 (m, 4H), 7.29-7.21 (m, 3H), 6.82 (dd,  $J$  = 16.0, 1.2 Hz, 1H), 6.32 (dd,  $J$  = 16.0, 6.8 Hz, 1H), 5.67 (dd,  $J$  = 6.8, 1.6 Hz, 1H), 1.41 (s, 9H).

**$^{13}\text{C}$  NMR** (101 MHz, Chloroform-*d*)  $\delta$  167.7, 165.8, 135.9, 134.8, 133.4, 129.9, 129.6, 128.7, 128.5, 126.9, 121.6, 82.8, 74.0, 28.0.

**HRMS(ESI)**  $m/z$ :  $[\text{M}+\text{H}]^+$  Calculated for  $\text{C}_{21}\text{H}_{22}\text{O}_4$  335.1591; Found 335.1593.

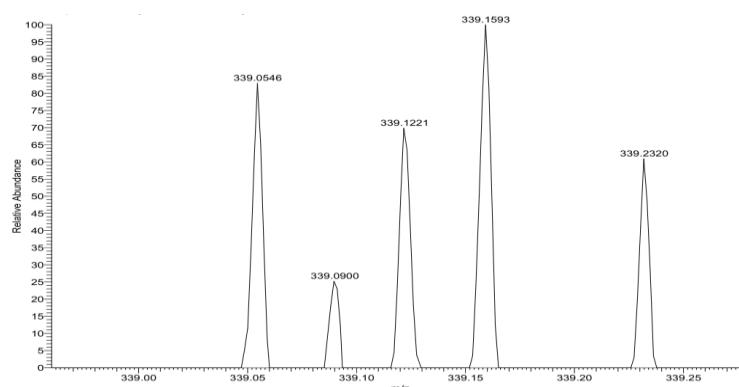

### (*R,E*)-1-methoxy-1-oxo-4-(*p*-tolyl)but-3-en-2-yl benzoate (**3ae**)

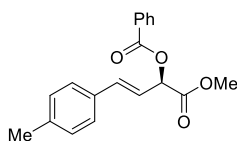

Prepared according to general procedure from  $\text{Rh}_2(\text{TFA})_4$  (2.6 mg, 0.004 mmol, 2 mol%), CPA1 (5.8 mg, 0.01 mmol, 5 mol%), benzoic acid (24.4 mg, 0.2 mmol, 1.0 equiv) and methyl (*E*)-2-diazo-4-(*p*-tolyl)but-3-enoate (86.4 mg, 0.4 mmol, 2.0 equiv) in *n*-pentane (4 mL) at rt for 5 min. The desired product was purified by silica gel column chromatography (Petroleum ether: ethyl acetate = 20:1-5:1) and obtained as yellow oil (42.2 mg, 68%).

$R_f$  (Petroleum ether/ EtOAc = 20:1) = 0.3.

**HPLC** (IA, *i*-PrOH/*n*-hexane = 1/99, flow rate = 1 mL/min,  $\lambda$  = 215 nm)  $t_R$  = 13.317 min (major), 14.225 min (minor), 94% ee.

$[\alpha]_D^{25}$ : -81.200 ( $c$  = 0.2,  $\text{CH}_2\text{Cl}_2$ ).



**<sup>1</sup>H NMR** (400 MHz, Chloroform-*d*) δ 8.15-8.13 (m, 2H), 7.60-7.56 (m, 1H), 7.48-7.44 (m, 2H), 7.34-7.32 (m, 2H), 7.15 (d, *J* = 7.9 Hz, 2H), 6.87 (d, *J* = 15.6 Hz, 1H), 6.35 (dd, *J* = 16.0, 7.2 Hz, 1H), 5.85 (dd, *J* = 7.2, 1.2 Hz, 1H), 3.79 (s, 3H), 2.34 (s, 3H).

**<sup>13</sup>C NMR** (101 MHz, Chloroform-*d*) δ 169.3, 165.8, 138.7, 135.6, 133.5, 132.8, 130.0, 129.5, 129.3, 128.5, 126.9, 119.8, 73.8, 52.8, 21.3.

**HRMS(ESI)** *m/z*: [M+H]<sup>+</sup> Calculated for C<sub>19</sub>H<sub>18</sub>O<sub>4</sub> 311.1278; Found 311.1279.

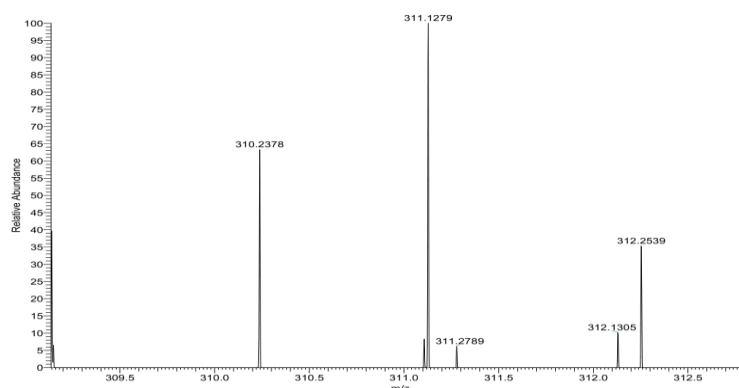

**(*R,E*)-4-(4-(tert-butyl)phenyl)-1-methoxy-1-oxobut-3-en-2-yl benzoate (3af)**

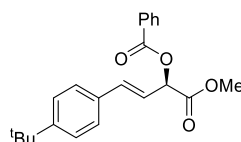

Prepared according to general procedure from Rh<sub>2</sub>(TFA)<sub>4</sub> (2.6 mg, 0.004 mmol, 2 mol%), CPA1 (5.8 mg, 0.01 mmol, 5 mol%), benzoic acid (24.4 mg, 0.2 mmol, 1.0 equiv) and methyl methyl (*E*)-4-(4-(tert-butyl)phenyl)-2-diazobut-3-enoate (104 mg, 0.4 mmol, 2.0 equiv) in *n*-pentane (4 mL) at rt for 5 min. The desired product was purified by silica gel column chromatography (Petroleum ether: ethyl acetate = 20:1-5:1) and obtained as yellow oil (49.3 mg, 70%).

**R<sub>f</sub>** (Petroleum ether/ EtOAc = 20:1) = 0.3.

**HPLC** (IA, *i*-PrOH/*n*-hexane = 10/90, flow rate = 1 mL/min, λ = 215 nm) *t<sub>R</sub>* = 6.985 min (major), 6.337 min (minor), 92% ee.

**[α]<sub>D</sub><sup>25</sup>**: -81.200 (c = 0.2, CH<sub>2</sub>Cl<sub>2</sub>).

**<sup>1</sup>H NMR** (400 MHz, Chloroform-*d*) δ 8.07-8.05 (m, 2H), 7.53-7.49 (m, 1H), 7.39 (t, *J* = 8.0 Hz, 2H), 7.30 (s, 4H), 6.81 (d, *J* = 16.0 Hz, 1H), 6.28 (dd, *J* = 16.0, 7.2 Hz, 1H), 5.77 (d, *J* = 6.0 Hz, 1H), 3.72 (s, 3H), 1.24 (s, 9H).

**<sup>13</sup>C NMR** (101 MHz, Chloroform-*d*) δ 169.4, 165.9, 152.0, 135.6, 133.6, 132.9, 130.1, 129.4, 128.6, 126.7, 125.8, 120.13, 73.9, 52.8, 34.8, 31.4.

**HRMS(ESI)** *m/z*: [M+H]<sup>+</sup> Calculated for C<sub>22</sub>H<sub>24</sub>O<sub>4</sub> 353.1747; Found 353.1745.

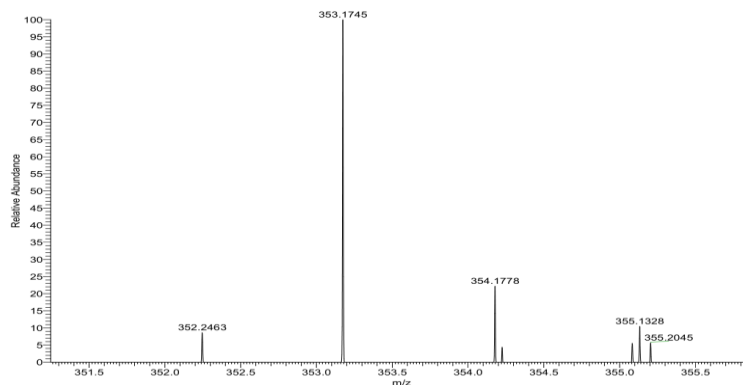

**(*R,E*)-4-(4-fluorophenyl)-1-methoxy-1-oxobut-3-en-2-yl benzoate (3ag)**

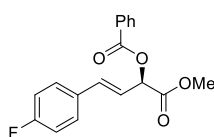

Prepared according to general procedure from  $\text{Rh}_2(\text{TFA})_4$  (2.6 mg, 0.004 mmol, 2 mol%), CPA1 (5.8 mg, 0.01 mmol, 5 mol%), benzoic acid (24.4 mg, 0.2 mmol, 1.0 equiv) and methyl methyl (*E*)-2-diazo-4-(4-fluorophenyl)but-3-enoate (88.0 mg, 0.4 mmol, 2.0 equiv) in *n*-pentane (4 mL) at rt for 5 min. The desired product was purified by silica gel column chromatography (Petroleum ether: ethyl acetate = 20:1-5:1) and obtained as yellow oil (52.8 mg, 84%).

$R_f$  (Petroleum ether/ EtOAc = 20:1) = 0.3.

HPLC (IA, *i*-PrOH/*n*-hexane = 10/90, flow rate = 1 mL/min,  $\lambda$  = 215 nm)  $t_R$  = 9.381 min (major), 10.153 min (minor), 92% ee.

$[\alpha]_D^{25}$ : -63.400 ( $c$  = 0.2,  $\text{CH}_2\text{Cl}_2$ ).

$^1\text{H NMR}$  (400 MHz, Chloroform-*d*)  $\delta$  8.15-8.13 (m, 2H), 7.62-7.58 (m, 1H), 7.49-7.40 (m, 4H), 7.07-7.01 (m, 2H), 6.87 (d,  $J$  = 17.2 Hz, 1H), 6.32 (dd,  $J$  = 16.0, 7.2 Hz, 1H), 5.86 (dd,  $J$  = 7.2, 1.2 Hz, 1H), 3.81 (s, 3H).

$^{13}\text{C NMR}$  (101 MHz, Chloroform-*d*)  $\delta$  196.2, 165.7, 162.9(d,  $^1J_{\text{C-F}}$  = 249.2 Hz), 134.3, 133.6, 131.8(d,  $^3J_{\text{C-F}}$  = 3.4 Hz), 130.0, 129.2, 128.6, 128.5, 120.7(d,  $^4J_{\text{C-F}}$  = 2.3 Hz), 115.7(d,  $^2J_{\text{C-F}}$  = 21.6 Hz), 73.53, 52.84.

$^{19}\text{F NMR}$  (282 MHz, Chloroform-*d*)  $\delta$  -112.70.

HRMS(ESI)  $m/z$ :  $[\text{M}+\text{H}]^+$  Calculated for  $\text{C}_{18}\text{H}_{15}\text{FO}_4$  315.1027; Found 315.1025.

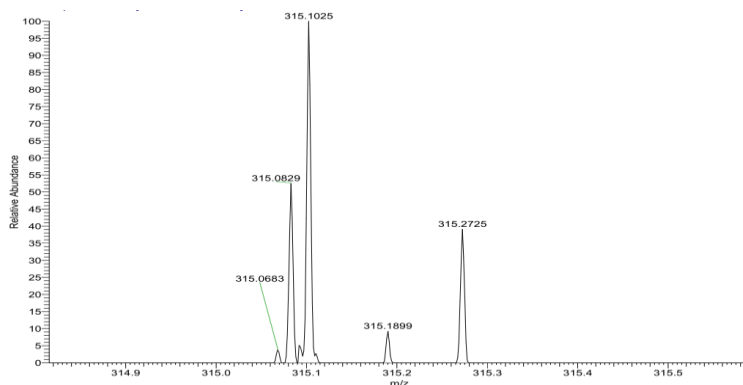

**(*R,E*)-4-(4-cyanophenyl)-1-methoxy-1-oxobut-3-en-2-yl benzoate (3ah)**

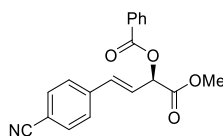

Prepared according to general procedure from  $\text{Rh}_2(\text{TFA})_4$  (2.6 mg, 0.004 mmol, 2 mol%), CPA1 (5.8 mg, 0.01 mmol, 5 mol%), benzoic acid (24.4 mg, 0.2 mmol, 1.0 equiv) and methyl (*E*)-4-(4-cyanophenyl)-2-diazobut-3-enoate (90.8 mg, 0.4 mmol, 2.0 equiv) in *n*-pentane (2 mL) and DCM (2 ml) at rt for 5 min. The desired product was purified by silica gel column chromatography (Petroleum ether: ethyl acetate = 20:1-5:1) and obtained as yellow oil (50.2 mg, 79%).

$R_f$  (Petroleum ether/ EtOAc = 20:1) = 0.3.

**HPLC** (IA, *i*-PrOH/*n*-hexane = 20/80, flow rate = 1 mL/min,  $\lambda$  = 215 nm)  $t_R$  = 14.236 min (major), 15.533 min (minor), 77% ee.

$[\alpha]_D^{25}$ : -51.100 ( $c$  = 0.2,  $\text{CH}_2\text{Cl}_2$ ).

**$^1\text{H NMR}$**  (400 MHz, Chloroform-*d*)  $\delta$  8.15 (d,  $J$  = 7.2 Hz, 2H), 7.65-7.61 (m, 3H), 7.57-7.47 (m, 4H), 6.92 (d,  $J$  = 15.6 Hz, 1H), 6.55 (dd,  $J$  = 16.0, 6.4 Hz, 1H), 5.94 (d,  $J$  = 7.6 Hz, 1H), 3.83 (s, 3H).

**$^{13}\text{C NMR}$**  (101 MHz, Chloroform-*d*)  $\delta$  168.6, 165.5, 140.0, 133.8, 133.0, 132.6, 130.0, 129.0, 128.6, 127.4, 125.0, 118.7, 111.8, 72.9, 53.0.

**HRMS(ESI)**  $m/z$ :  $[\text{M}+\text{H}]^+$  Calculated for  $\text{C}_{19}\text{H}_{15}\text{NO}_4$  322.1074; Found 322.1075.

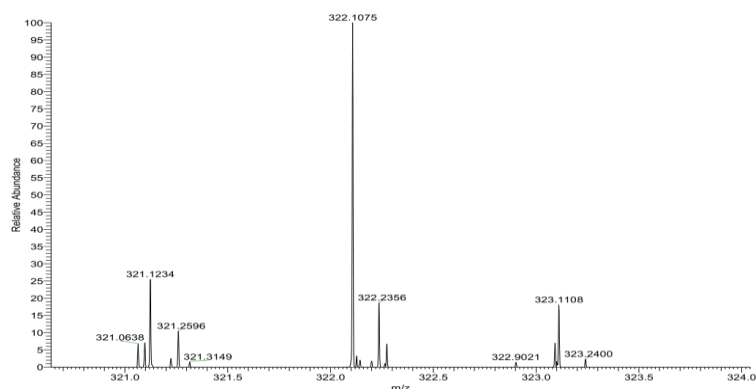

**(*R,E*)-1-methoxy-1-oxo-4-(*o*-tolyl)but-3-en-2-yl benzoate (3ai)**

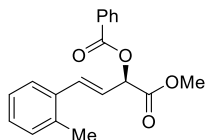

Prepared according to general procedure from  $\text{Rh}_2(\text{TFA})_4$  (2.6 mg, 0.004 mmol, 2 mol%), CPA1 (5.8 mg, 0.01 mmol, 5 mol%), benzoic acid (24.4 mg, 0.2 mmol, 1.0 equiv) and methyl (*E*)-2-diazo-4-(*o*-tolyl)but-3-enoate (86.4 mg, 0.4 mmol, 2.0 equiv) in *n*-pentane (4 mL) at rt for 5 min. The desired product was purified by silica gel column chromatography (Petroleum ether: ethyl acetate = 20:1-5:1) and obtained as yellow oil (49.0 mg, 79%).

$R_f$  (Petroleum ether/ EtOAc = 20:1) = 0.3.

**HPLC** (IA, *i*-PrOH/*n*-hexane = 1/99, flow rate = 1 mL/min,  $\lambda$  = 215 nm)  $t_R$  = 9.660 min (major), 10.536 min (minor), 90% ee.

$[\alpha]_D^{25}$ : -54.800 (c = 0.2, CH<sub>2</sub>Cl<sub>2</sub>).

<sup>1</sup>H NMR (400 MHz, Chloroform-*d*) δ 8.15-8.13 (m, 2H), 7.61-7.57 (m, 1H), 7.52-7.44 (m, 3H), 7.21-7.18 (m, 2H), 7.17-7.13 (m, 2H), 6.29 (dd, *J* = 15.6, 7.2 Hz, 1H), 5.89 (dd, *J* = 7.2, 1.2 Hz, 1H), 3.81 (s, 3H), 2.38 (s, 3H).

<sup>13</sup>C NMR (101 MHz, Chloroform-*d*) δ 169.3, 165.7, 136.0, 134.7, 133.5, 133.5, 130.5, 130.0, 129.9, 129.3, 128.5, 126.3, 125.9, 122.2, 73.9, 52.8, 19.8.

HRMS(ESI) *m/z*: [M+H]<sup>+</sup> Calculated for C<sub>19</sub>H<sub>18</sub>O<sub>4</sub> 311.1278; Found 311.1277.

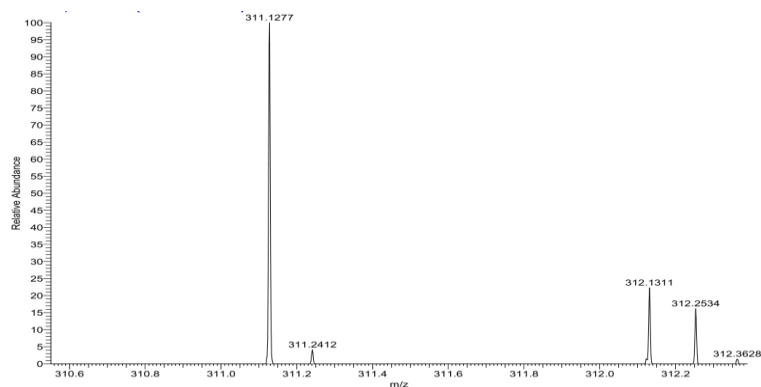

#### (*R,E*)-4-(2-fluorophenyl)-1-methoxy-1-oxobut-3-en-2-yl benzoate (**3aj**)

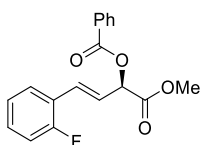

Prepared according to general procedure from Rh<sub>2</sub>(TFA)<sub>4</sub> (2.6 mg, 0.004 mmol, 2 mol%), CPA1 (5.8 mg, 0.01 mmol, 5 mol%), benzoic acid (24.4 mg, 0.2 mmol, 1.0 equiv) and methyl (*E*)-2-diazo-4-(2-fluorophenyl)but-3-enoate (88.0 mg, 0.4 mmol, 2.0 equiv) in *n*-pentane (4 mL) at rt for 5 min. The desired product was purified by silica gel column chromatography (Petroleum ether: ethyl acetate = 20:1-5:1) and obtained as yellow oil (59.7 mg, 95%).

**R<sub>f</sub>** (Petroleum ether/ EtOAc = 20:1) = 0.3.

**HPLC** (IA, *i*-PrOH/*n*-hexane = 5/95, flow rate = 1 mL/min, λ = 215 nm) *t<sub>R</sub>* = 9.179 min (major), 9.857 min (minor), 92% ee.

$[\alpha]_D^{25}$ : -73.400 (c = 0.2, CH<sub>2</sub>Cl<sub>2</sub>).

<sup>1</sup>H NMR (400 MHz, Chloroform-*d*) δ 8.17-8.13 (m, 2H), 7.62-7.58 (m, 1H), 7.51-7.45 (m, 3H), 7.29-7.24 (m, 1H), 7.14-7.03 (m, 3H), 6.52 (dd, *J* = 16.0, 7.2 Hz, 1H), 5.90 (dd, *J* = 6.8, 1.6 Hz, 1H), 3.81 (s, 3H).

<sup>13</sup>C NMR (101 MHz, Chloroform-*d*) δ 169.0, 165.7, 160.5 (d, *J* = 250.8 Hz), 133.6, 130.1, 130.0 (d, *J* = 8.4 Hz), 129.2, 128.5, 128.0 (d, *J* = 3.4 Hz), 124.3 (d, *J* = 3.6 Hz), 123.6 (d, *J* = 5.7 Hz), 123.4 (d, *J* = 11.9 Hz), 115.95 (d, *J* = 22.1 Hz), 73.6, 52.8.

<sup>19</sup>F NMR (282 MHz, Chloroform-*d*) δ -116.89.

HRMS(ESI) *m/z*: [M+H]<sup>+</sup> Calculated for C<sub>18</sub>H<sub>15</sub>FO<sub>4</sub> 315.1027; Found 315.1026.

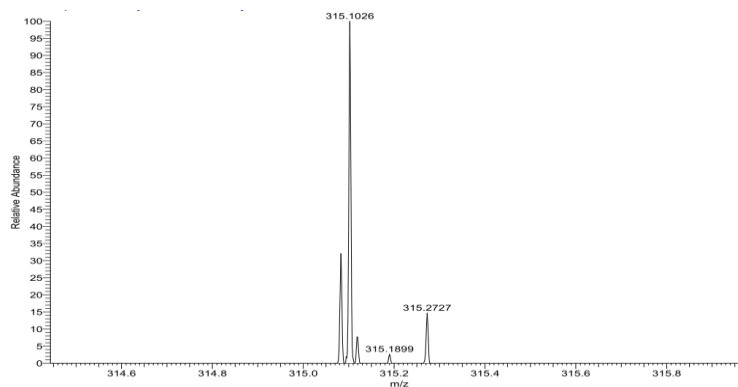

**(*R,E*)-4-(2-chlorophenyl)-1-methoxy-1-oxobut-3-en-2-yl benzoate (3ak)**

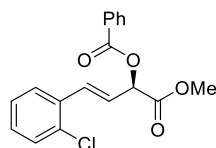

Prepared according to general procedure from  $\text{Rh}_2(\text{TFA})_4$  (2.6 mg, 0.004 mmol, 2 mol%), CPA1 (5.8 mg, 0.01 mmol, 5 mol%), benzoic acid (24.4 mg, 0.2 mmol, 1.0 equiv) and methyl (*E*)-4-(2-chlorophenyl)-2-diazobut-3-enoate (94.4 mg, 0.4 mmol, 2.0 equiv) in *n*-pentane (4 mL) at rt for 5 min. The desired product was purified by silica gel column chromatography (Petroleum ether: ethyl acetate = 20:1-5:1) and obtained as yellow oil (62.7 mg, 95%).

$R_f$  (Petroleum ether/ EtOAc = 20:1) = 0.3.

HPLC (IA, *i*-PrOH/*n*-hexane = 10/90, flow rate = 1 mL/min,  $\lambda$  = 215 nm)  $t_R$  = 17.560 min (major), 19.113 min (minor), 92% ee.

$[\alpha]_D^{25}$ : -36.600 ( $c$  = 0.2,  $\text{CH}_2\text{Cl}_2$ ).

$^1\text{H NMR}$  (400 MHz, Chloroform-*d*)  $\delta$  8.17-8.14 (m, 2H), 7.62-7.55 (m, 2H), 7.50-7.46 (m, 2H), 7.39-7.32 (m, 2H), 7.25-7.22 (m, 2H), 6.41 (dd,  $J$  = 15.6, 6.4 Hz, 1H), 5.93 (dd,  $J$  = 6.8, 1.6 Hz, 1H), 3.82 (s, 3H).

$^{13}\text{C NMR}$  (101 MHz, Chloroform-*d*)  $\delta$  169.0, 165.7, 133.7, 133.6, 131.3, 130.0, 129.9, 129.6, 129.2, 128.6, 127.1, 127.0, 123.6, 73.4, 52.9.

HRMS(ESI)  $m/z$ :  $[\text{M}+\text{H}]^+$  Calculated for  $\text{C}_{18}\text{H}_{15}\text{ClO}_4$  331.0732; Found 331.0731.

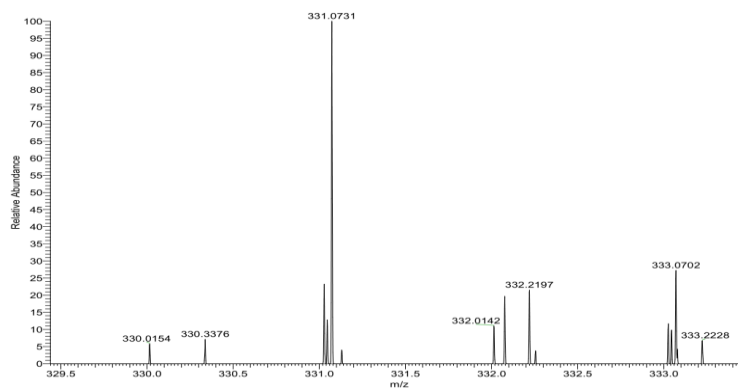

**(*R,E*)-1-methoxy-1-oxo-4-(*m*-tolyl)but-3-en-2-yl benzoate (3al)**

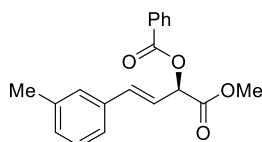

Prepared according to general procedure from  $\text{Rh}_2(\text{TFA})_4$  (2.6 mg, 0.004 mmol, 2 mol%), CPA1 (5.8 mg, 0.01 mmol, 5 mol%), benzoic acid (24.4 mg, 0.2 mmol, 1.0 equiv) and methyl (*E*)-2-diazo-4-(*m*-tolyl)but-3-enoate (86.4 mg, 0.4 mmol, 2.0 equiv) in *n*-pentane (4 mL) at rt for 5 min. The desired product was purified by silica gel column chromatography (Petroleum ether: ethyl acetate = 20:1-5:1) and obtained as yellow oil (50.2 mg, 81%).

$R_f$  (Petroleum ether/ EtOAc = 20:1) = 0.3.

**HPLC** (IA, *i*-PrOH/*n*-hexane = 10/90, flow rate = 1 mL/min,  $\lambda$  = 215 nm)  $t_R$  = 6.849 min (major), 7.480 min (minor), 94% ee.

$[\alpha]_D^{25}$ : -77.300 ( $c$  = 0.2,  $\text{CH}_2\text{Cl}_2$ ).

**$^1\text{H NMR}$**  (400 MHz, Chloroform-*d*)  $\delta$  8.14 (d,  $J$  = 8.0 Hz, 2H), 7.61-7.56 (m, 1H), 7.46 (t,  $J$  = 7.6 Hz, 2H), 7.26-7.21 (m, 3H), 7.11-7.10 (m, 1H), 6.88 (d,  $J$  = 15.6 Hz, 1H), 6.39 (dd,  $J$  = 16.0, 7.2 Hz, 1H), 5.86 (d,  $J$  = 7.2 Hz, 1H), 3.80 (s, 3H), 2.35 (s, 3H).

**$^{13}\text{C NMR}$**  (101 MHz, Chloroform-*d*)  $\delta$  169.3, 165.77, 138.4, 135.7, 135.5, 133.6, 130.0, 129.5, 129.3, 128.7, 128.5, 127.6, 124.1, 120.7, 73.7, 52.8, 21.4.

**HRMS(ESI)**  $m/z$ :  $[\text{M}+\text{H}]^+$  Calculated for  $\text{C}_{19}\text{H}_{18}\text{O}_4$  311.1278; Found 311.1278.

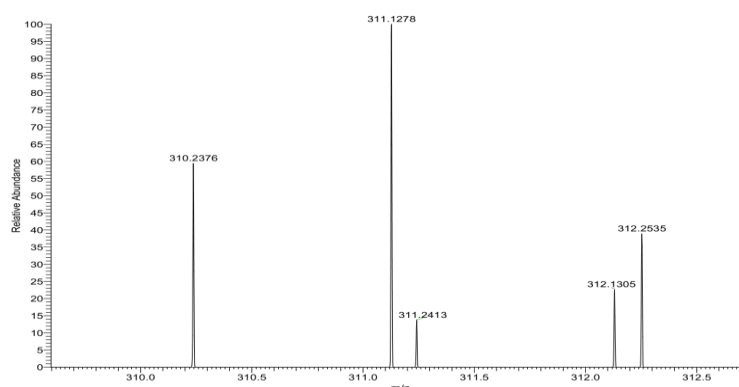

### (*R,E*)-1-methoxy-1-oxopent-3-en-2-yl benzoate (3am)

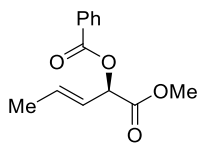

Prepared according to general procedure from  $\text{Rh}_2(\text{TFA})_4$  (2.6 mg, 0.004 mmol, 2 mol%), CPA1 (5.8 mg, 0.01 mmol, 5 mol%), benzoic acid (24.4 mg, 0.2 mmol, 1.0 equiv) and methyl (*E*)-2-diazopent-3-enoate (56.0 mg, 0.4 mmol, 2.0 equiv) in *n*-pentane (4 mL) at rt for 5 min. The desired product was purified by silica gel column chromatography (Petroleum ether: ethyl acetate = 20:1-5:1) and obtained as colorless oil (30.4 mg, 65%).

$R_f$  (Petroleum ether/ EtOAc = 20:1) = 0.3.

**HPLC** (IC, *i*-PrOH/*n*-hexane = 1/99, flow rate = 1 mL/min,  $\lambda$  = 215 nm)  $t_R$  = 15.857 min (major), 14.823 min (minor), 92% ee.

$[\alpha]_D^{25}$ : -12.800 ( $c$  = 0.2,  $\text{CH}_2\text{Cl}_2$ ).

**<sup>1</sup>H NMR** (400 MHz, Chloroform-*d*) δ 8.11-8.09 (m, 2H), 7.60-7.56 (m, 1H), 7.48-7.43 (m, 2H), 6.09-6.03 (m, 1H), 5.75-5.73 (m, 1H), 5.65-5.63 (m, 1H), 3.78 (s, 3H), 1.81-1.79 (m, 3H).  
**<sup>13</sup>C NMR** (101 MHz, Chloroform-*d*) δ 169.6, 165.8, 133.4, 133.1, 129.9, 129.4, 128.4, 123.2, 73.7, 52.6, 18.0.

**HRMS(ESI) m/z:** [M+H]<sup>+</sup> Calculated for C<sub>13</sub>H<sub>14</sub>O<sub>4</sub> 235.0965; Found 235.0964.

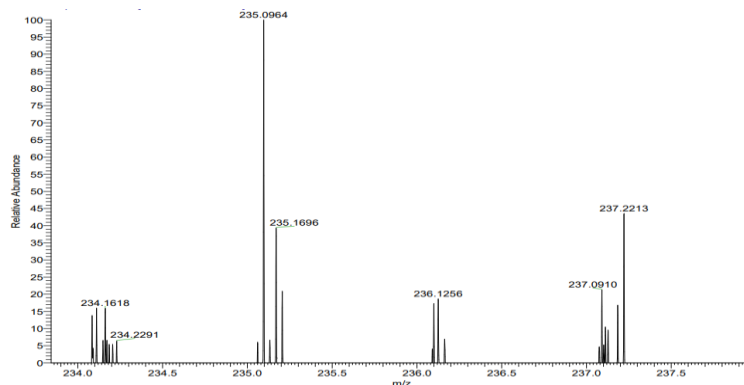

### **(*R,E*)-1-methoxy-1-oxooct-3-en-2-yl benzoate (3an)**

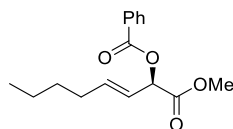

Prepared according to general procedure from Rh<sub>2</sub>(TFA)<sub>4</sub> (2.6 mg, 0.004 mmol, 2 mol%), CPA1 (5.8 mg, 0.01 mmol, 5 mol%), benzoic acid (24.4 mg, 0.2 mmol, 1.0 equiv) and methyl (*E*)-2-diazoct-3-enoate (72.8 mg, 0.4 mmol, 2.0 equiv) in *n*-pentane (4 mL) at rt for 5 min. The desired product was purified by silica gel column chromatography (Petroleum ether: ethyl acetate = 20:1-5:1) and obtained as colorless oil (38.6 mg, 70%).

**R<sub>f</sub>** (Petroleum ether/ EtOAc = 20:1) = 0.3.

**HPLC** (IC, *i*-PrOH/*n*-hexane = 1/99, flow rate = 1 mL/min, λ = 215 nm) t<sub>R</sub> = 12.620 min (major), 11.859 min (minor), 92% ee.

**[α]<sub>D</sub><sup>25</sup>:** -40.500 (c = 0.2, CH<sub>2</sub>Cl<sub>2</sub>).

**<sup>1</sup>H NMR** (400 MHz, Chloroform-*d*) δ 8.12-8.09 (m, 2H), 7.61-7.56 (m, 1H), 7.48-7.44 (m, 2H), 6.08-6.01 (m, 1H), 5.72-5.63 (m, 2H), 3.78 (s, 3H), 2.13 (q, *J* = 6.8 Hz, 2H), 1.37 (m, 4H), 0.91 (t, *J* = 7.2 Hz, 3H).

**<sup>13</sup>C NMR** (101 MHz, Chloroform-*d*) δ 169.7, 165.81, 138.3, 133.4, 130.0, 129.4, 128.5, 121.8, 73.8, 52.6, 32.1, 30.8, 22.2, 13.9.

**HRMS(ESI) m/z:** [M+H]<sup>+</sup> Calculated for C<sub>16</sub>H<sub>20</sub>O<sub>4</sub> 277.1434; Found 277.1436.

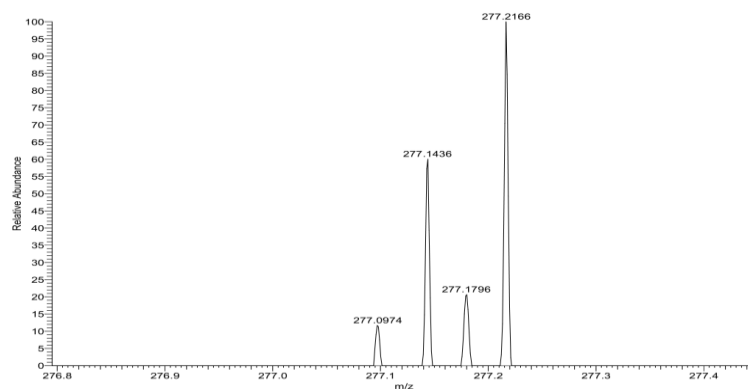

**(*R,E*)-1-methoxy-1-oxo-4-phenylbut-3-en-2-yl 4-methylbenzoate<sup>[2]</sup> (3ba)**

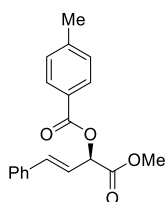

Prepared according to general procedure from  $\text{Rh}_2(\text{TFA})_4$  (2.6 mg, 0.004 mmol, 2 mol%), CPA1 (5.8 mg, 0.01 mmol, 5 mol%), 4-methylbenzoic acid (27.3 mg, 0.2 mmol, 1.0 equiv) and methyl (*E*)-2-diazo-4-phenylbut-3-enoate (80.8 mg, 0.4 mmol, 2.0 equiv) in *n*-pentane (4 mL) at rt for 5 min. The desired product was purified by silica gel column chromatography (Petroleum ether: ethyl acetate = 20:1-5:1) and obtained as yellow oil (50.8 mg, 82%).

$R_f$  (Petroleum ether/ EtOAc = 20:1) = 0.3.

HPLC (IA, *i*-PrOH/*n*-hexane = 10/90, flow rate = 1 mL/min,  $\lambda$  = 215 nm)  $t_R$  = 9.310 min (major), 9.941 min (minor), 94% ee.

$[\alpha]_D^{25}$ : -63.000 ( $c$  = 0.2,  $\text{CH}_2\text{Cl}_2$ ).

$^1\text{H NMR}$  (400 MHz, Chloroform-*d*)  $\delta$  8.04-8.01 (m, 2H), 7.45-7.43 (m, 2H), 7.37-7.25 (m, 5H), 6.90 (d,  $J$  = 16.0 Hz, 1H), 6.40 (dd,  $J$  = 16.0, 6.8 Hz, 1H), 5.86 (dd,  $J$  = 7.2, 1.6 Hz, 1H), 3.80 (s, 3H), 2.42 (s, 3H).

$^{13}\text{C NMR}$  (101 MHz, Chloroform-*d*)  $\delta$  169.3, 165.8, 144.3, 135.6, 135.4, 130.0, 129.2, 128.7, 128.6, 126.9, 126.6, 121.1, 73.5, 52.7, 21.8.

**(*R,E*)-1-methoxy-1-oxo-4-phenylbut-3-en-2-yl 4-(*tert*-butyl)benzoate (3ca)**

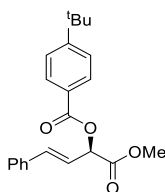

Prepared according to general procedure from  $\text{Rh}_2(\text{TFA})_4$  (2.6 mg, 0.004 mmol, 2 mol%), CPA1 (5.8 mg, 0.01 mmol, 5 mol%), 4-(*tert*-butyl)benzoic acid (35.6 mg, 0.2 mmol) and methyl (*E*)-2-diazo-4-phenylbut-3-enoate (80.8 mg, 0.4 mmol, 2.0 equiv) in *n*-pentane (4 mL) at rt for 5 min. The desired product was purified by silica gel column chromatography (Petroleum ether: ethyl acetate = 20:1-5:1) and obtained as yellow oil (56.3 mg, 80%).

$R_f$  (Petroleum ether/ EtOAc = 20:1) = 0.3.



**HPLC** (IA, *i*-PrOH/*n*-hexane = 1/99, flow rate = 1 mL/min,  $\lambda$  = 215 nm)  $t_R$  = 15.450 min (major), 14.251 min (minor), 90% ee.

$[\alpha]_D^{25}$ : -49.500 ( $c$  = 0.2, CH<sub>2</sub>Cl<sub>2</sub>).

**<sup>1</sup>H NMR** (400 MHz, Chloroform-*d*)  $\delta$  8.08-7.06 (m, 2H), 7.50-7.29 (m, 7H), 6.90 (d,  $J$  = 16 Hz, 1H), 6.40 (dd,  $J$  = 16, 6.8 Hz, 1H), 5.87 (dd,  $J$  = 7.2, 1.6 Hz, 1H), 3.80 (s, 3H), 1.34 (s, 9H).

**<sup>13</sup>C NMR** (101 MHz, Chloroform-*d*)  $\delta$  169.3, 165.7, 157.3, 135.7, 135.2, 129.9, 128.7, 128.6, 126.9, 126.5, 125.5, 121.1, 73.4, 52.7, 35.2, 31.1.

**HRMS(ESI)**  $m/z$ :  $[M+H]^+$  Calculated for C<sub>22</sub>H<sub>24</sub>O<sub>4</sub> 353.1744; Found 353.1747.

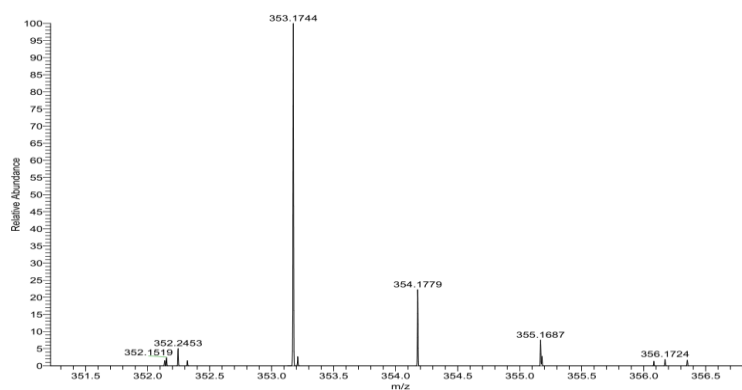

#### **(*R,E*)-1-methoxy-1-oxo-4-phenylbut-3-en-2-yl 4-fluorobenzoate (3da)**

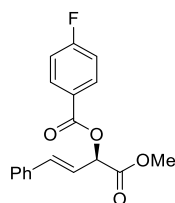

Prepared according to general procedure from Rh<sub>2</sub>(TFA)<sub>4</sub> (2.6 mg, 0.004 mmol, 2 mol%), CPA1 (5.8 mg, 0.01 mmol, 5 mol%), 4-fluorobenzoic acid (28.0 mg, 0.2 mmol, 1.0 equiv) and methyl (*E*)-2-diazo-4-phenylbut-3-enoate (80.8 mg, 0.4 mmol, 2.0 equiv) in *n*-pentane (4 mL) at rt for 5 min. The desired product was purified by silica gel column chromatography (Petroleum ether: ethyl acetate = 20:1-5:1) and obtained as colorless oil (46.5 mg, 74%).

**R<sub>f</sub>** (Petroleum ether/ EtOAc = 20:1) = 0.3.

**HPLC** (IA, *i*-PrOH/*n*-hexane = 10/90, flow rate = 1 mL/min,  $\lambda$  = 215 nm)  $t_R$  = 8.287 min (major), 9.167 min (minor), 90% ee.

$[\alpha]_D^{25}$ : -71.800 ( $c$  = 0.2, CH<sub>2</sub>Cl<sub>2</sub>).

**<sup>1</sup>H NMR** (400 MHz, Chloroform-*d*)  $\delta$  8.18-8.13 (m, 2H), 7.46-7.43 (m, 2H), 7.38-7.30 (m, 3H), 7.17-7.13 (m, 2H), 6.90 (d,  $J$  = 16.0 Hz, 1H), 6.39 (dd,  $J$  = 15.6, 7.2 Hz, 1H), 5.85 (dd,  $J$  = 7.2, 1.2 Hz, 1H), 3.81 (s, 3H).

**<sup>13</sup>C NMR** (101 MHz, Chloroform-*d*)  $\delta$  169.1, 166.1 (d,  $^1J_{C-F}$  = 255.9 Hz), 164.7, 135.7, 135.5, 132.6 (d,  $^3J_{C-F}$  = 9.5 Hz), 128.8, 128.7, 126.9, 125.5 (d,  $^4J_{C-F}$  = 2.9 Hz), 120.8, 115.7 (d,  $^2J_{C-F}$  = 22.2 Hz), 73.72, 52.79.

**<sup>19</sup>F NMR** (282 MHz, Chloroform-*d*)  $\delta$  -104.61.

**HRMS(ESI)**  $m/z$ :  $[M+H]^+$  Calculated for C<sub>18</sub>H<sub>15</sub>FO<sub>4</sub> 315.1027; Found 315.1024.

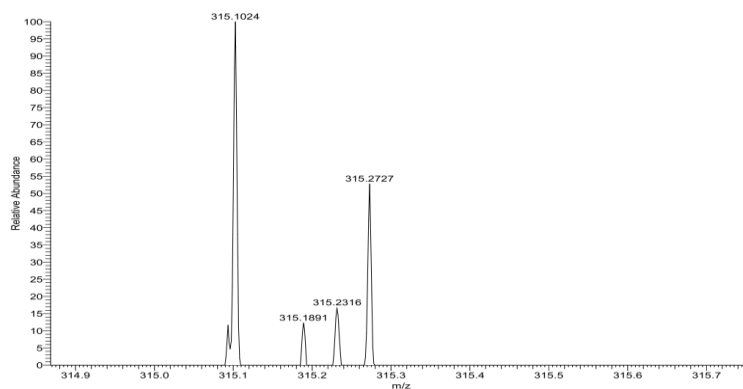

**(*R,E*)-1-methoxy-1-oxo-4-phenylbut-3-en-2-yl 4-(trifluoromethyl)benzoate (3ea)**

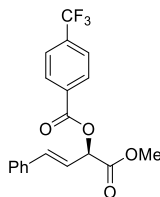

Prepared according to general procedure from  $\text{Rh}_2(\text{TFA})_4$  (2.6 mg, 0.004 mmol, 2 mol%), CPA1 (5.8 mg, 0.01 mmol, 5 mol%), 4-(trifluoromethyl)benzoic acid (38.0 mg, 0.2 mmol, 1.0 equiv) and methyl (*E*)-2-diazo-4-phenylbut-3-enoate (80.8 mg, 0.4 mmol, 2.0 equiv) in *n*-pentane (4 mL) at rt for 5 min. The desired product was purified by silica gel column chromatography (Petroleum ether: ethyl acetate = 20:1-5:1) and obtained as yellow oil (37.9 mg, 52%).

$R_f$  (Petroleum ether/ EtOAc = 20:1) = 0.3.

**HPLC** (IA, *i*-PrOH/*n*-hexane = 1/99, flow rate = 1 mL/min,  $\lambda$  = 215 nm)  $t_R$  = 11.194 min (major), 13.421 min (minor), 92% ee.

$[\alpha]_D^{25}$ : -61.700 ( $c$  = 0.2,  $\text{CH}_2\text{Cl}_2$ ).

**$^1\text{H NMR}$**  (400 MHz, Chloroform-*d*)  $\delta$  8.26-8.24 (m, 2H), 7.75-7.73 (m, 2H), 7.46-7.43 (m, 2H), 7.38-7.31 (m, 3H), 6.91 (d,  $J$  = 15.2 Hz, 1H), 6.40 (dd,  $J$  = 15.6, 7.2 Hz, 1H), 5.89 (dd,  $J$  = 7.2, 1.2 Hz, 1H), 3.82 (s, 3H).

**$^{13}\text{C NMR}$**  (101 MHz,  $\text{CDCl}_3$ )  $\delta$  168.9, 164.6, 136.1, 135.5, 135.4, 134.9 (q,  $^2J_{C-F}$  = 32.8 Hz), 132.5, 130.4, 128.8, 128.7, 126.9, 125.6 (q,  $^3J_{C-F}$  = 3.7 Hz), 123.6 (q,  $^1J_{C-F}$  = 273.7 Hz), 120.4, 74.1, 52.9.

**$^{19}\text{F NMR}$**  (282 MHz, Chloroform-*d*)  $\delta$  -63.16.

**HRMS(ESI)**  $m/z$ :  $[\text{M}+\text{H}]^+$  Calculated for  $\text{C}_{19}\text{H}_{15}\text{F}_3\text{O}_4$  365.0995; Found 365.0995.

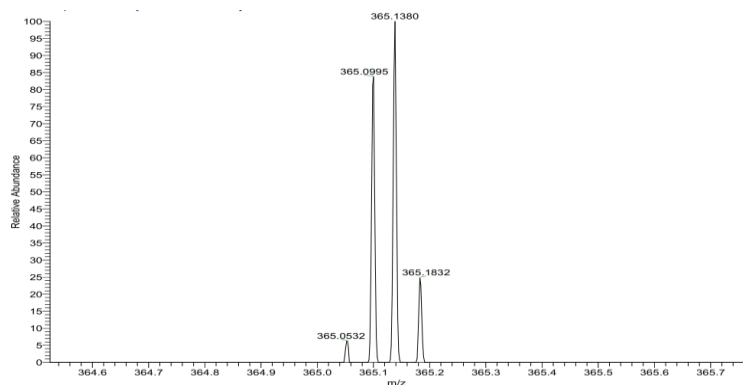

**(*R,E*)-1-methoxy-1-oxo-4-phenylbut-3-en-2-yl 2-methylbenzoate<sup>[2]</sup> (3fa)**

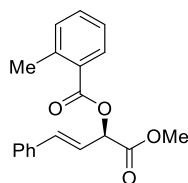

Prepared according to general procedure from  $\text{Rh}_2(\text{TFA})_4$  (2.6 mg, 0.004 mmol, 2 mol%), CPA1 (5.8 mg, 0.01 mmol, 5 mol%), 2-methylbenzoic acid (27.2 mg, 0.2 mmol, 1.0 equiv) and methyl (*E*)-2-diazo-4-phenylbut-3-enoate (80.8 mg, 0.4 mmol, 2.0 equiv) in *n*-pentane (4 mL) at rt for 5 min. The desired product was purified by silica gel column chromatography (Petroleum ether: ethyl acetate = 20:1-5:1) and obtained as colorless oil (57.0 mg, 92%).

$R_f$  (Petroleum ether/ EtOAc = 20:1) = 0.3.

**HPLC** (IA, *i*-PrOH/*n*-hexane = 10/90, flow rate = 1 mL/min,  $\lambda$  = 215 nm)  $t_R$  = 7.047 min (major), 8.547 min (minor), 93% ee.

$[\alpha]_D^{25}$ : -106.700 ( $c$  = 0.2,  $\text{CH}_2\text{Cl}_2$ ).

**<sup>1</sup>H NMR** (400 MHz, Chloroform-*d*)  $\delta$  8.08 (dd,  $J$  = 7.6, 1.6 Hz, 1H), 7.45-7.41 (m, 3H), 7.36-7.24 (m, 5H), 6.90 (d,  $J$  = 17.6 Hz, 1H), 6.39 (dd,  $J$  = 16.0, 7.2 Hz, 1H), 5.85 (d,  $J$  = 6.8 Hz, 1H), 3.81 (s, 3H), 2.64 (s, 3H).

**<sup>13</sup>C NMR** (101 MHz, Chloroform-*d*)  $\delta$  169.4, 166.7, 140.8, 135.6, 135.5, 132.6, 131.8, 131.1, 128.8, 128.7, 128.7, 127.0, 125.9, 121.0, 73.6, 52.8, 21.9.

**(*R,E*)-1-methoxy-1-oxo-4-phenylbut-3-en-2-yl 2-fluorobenzoate (3ga)**

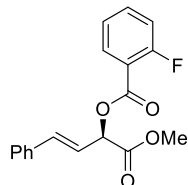

Prepared according to general procedure from  $\text{Rh}_2(\text{TFA})_4$  (2.6 mg, 0.004 mmol, 2 mol%), C1 (5.8 mg, 0.01 mmol, 5 mol%), 2-fluorobenzoic acid (28.0 mg, 0.2 mmol, 1.0 equiv) and methyl (*E*)-2-diazo-4-phenylbut-3-enoate (80.8 mg, 0.4 mmol, 2.0 equiv) in *n*-pentane (4 mL) at rt for 5-15 min. The desired product was purified by silica gel column chromatography (Petroleum ether: ethyl acetate = 20:1-5:1) and obtained as yellow oil (48.4 mg, 77%).

$R_f$  (Petroleum ether/ EtOAc = 20:1) = 0.3.

**HPLC** (IA, *i*-PrOH/*n*-hexane = 1/99, flow rate = 1 mL/min,  $\lambda$  = 215 nm)  $t_R$  = 13.930 min (major), 15.930 min (minor), 82% ee.

$[\alpha]_D^{25}$ : -69.600 ( $c$  = 0.2,  $\text{CH}_2\text{Cl}_2$ ).

**<sup>1</sup>H NMR** (400 MHz, Chloroform-*d*)  $\delta$  8.05 (td,  $J$  = 7.6, 2.0 Hz, 1H), 7.59-7.53 (m, 1H), 7.45-7.42 (m, 2H), 7.37-7.14 (m, 5H), 6.94 (d,  $J$  = 16.0 Hz, 1H), 6.38 (dd,  $J$  = 16.0, 6.8 Hz, 1H), 5.89 (d,  $J$  = 7.2 Hz, 1H), 3.81 (s, 3H).

**<sup>13</sup>C NMR** (101 MHz, Chloroform-*d*)  $\delta$  168.9, 163.4 (d,  $J$  = 3.6 Hz), 162.3 (d,  $J$  = 261.4 Hz), 135.6, 135.4, 135.2 (d,  $J$  = 9.1 Hz), 132.5, 128.7, 128.6, 126.9, 124.1 (d,  $J$  = 4.0 Hz), 120.5, 117.8 (d,  $J$  = 9.4 Hz), 117.2 (d,  $J$  = 22.1 Hz), 73.8, 52.8.

**HRMS (ESI)**  $m/z$ :  $[\text{M}+\text{Na}]^+$  Calculated for  $\text{C}_{18}\text{H}_{15}\text{FO}_4$  337.0847; Found 337.0840.

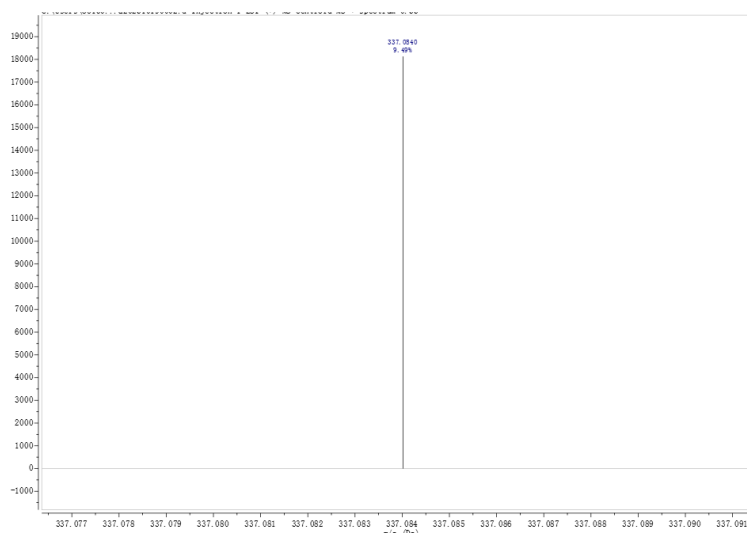

**(*R,E*)-1-methoxy-1-oxo-4-phenylbut-3-en-2-yl 3-methylbenzoate<sup>[2]</sup> (3ha)**

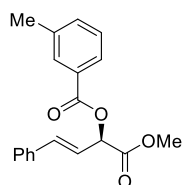

Prepared according to general procedure from  $\text{Rh}_2(\text{TFA})_4$  (2.6 mg, 0.004 mmol, 2 mol%), CPA1 (5.8 mg, 0.01 mmol, 5 mol%), 3-methylbenzoic acid (27.2 mg, 0.2 mmol, 1.0 equiv) and methyl (*E*)-2-diazo-4-phenylbut-3-enoate (80.8 mg, 0.4 mmol, 2.0 equiv) in *n*-pentane (4 mL) at rt for 5 min. The desired product was purified by silica gel column chromatography (Petroleum ether: ethyl acetate = 20:1-5:1) and obtained as colorless oil (50.8 mg, 82%).

**R<sub>f</sub>** (Petroleum ether/ EtOAc = 20:1) = 0.3.

**HPLC** (IC, *i*-PrOH/*n*-hexane = 5/95, flow rate = 1 mL/min,  $\lambda$  = 215 nm)  $t_R$  = 18.806 min (major), 16.260 min (minor), 94% ee.

**[ $\alpha$ ]<sub>D</sub><sup>25</sup>**: -86.800 (c = 0.2, CH<sub>2</sub>Cl<sub>2</sub>).

**<sup>1</sup>H NMR** (400 MHz, Chloroform-*d*)  $\delta$  7.95-7.94 (m, 2H), 7.46-7.29 (m, 7H), 6.90 (d,  $J$  = 15.6 Hz, 1H), 6.41 (dd,  $J$  = 16.0, 7.2 Hz, 1H), 5.86 (d,  $J$  = 8.4 Hz, 1H), 3.80 (s, 3H), 2.41 (s, 3H).

**<sup>13</sup>C NMR** (101 MHz, Chloroform-*d*)  $\delta$  169.3, 166.0, 138.4, 135.6, 135.6, 134.4, 130.5, 129.2, 128.8, 128.7, 128.5, 127.2, 127.0, 121.0, 73.7, 52.8, 21.4.

**(*R,E*)-1-methoxy-1-oxo-4-phenylbut-3-en-2-yl 3-chlorobenzoate (3ia)**

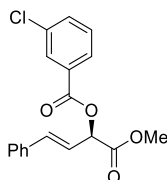

Prepared according to general procedure from  $\text{Rh}_2(\text{TFA})_4$  (2.6 mg, 0.004 mmol, 2 mol%), CPA1 (5.8 mg, 0.01 mmol, 5 mol%), 3-chlorobenzoic acid (31.4 mg, 0.2 mmol, 1.0 equiv) and methyl (*E*)-2-diazo-4-phenylbut-3-enoate (80.8 mg, 0.4 mmol, 2.0 equiv) in *n*-pentane (4 mL) at rt for 5 min. The desired product was purified by silica gel column chromatography (Petroleum ether: ethyl acetate

= 20:1-5:1) and obtained as yellow oil (48.0 mg, 73%).

**R<sub>f</sub>** (Petroleum ether/ EtOAc = 20:1) = 0.3.

**HPLC** (IA, *i*-PrOH/*n*-hexane = 10/90, flow rate = 1 mL/min,  $\lambda$  = 215 nm)  $t_R$  = 7.830 min (major), 8.535 min (minor), 92% ee.

**[ $\alpha$ ]<sub>D</sub><sup>25</sup>**: -73.500 (c = 0.2, CH<sub>2</sub>Cl<sub>2</sub>).

**<sup>1</sup>H NMR** (400 MHz, Chloroform-*d*)  $\delta$  8.11-8.00 (m, 2H), 7.58-7.55 (m, 1H), 7.46-7.30 (m, 6H), 6.90 (d,  $J$  = 14.8 Hz, 1H), 6.39 (dd,  $J$  = 16.0, 7.2 Hz, 1H), 5.86 (dd,  $J$  = 7.2, 1.2 Hz, 1H), 3.81 (s, 3H).

**<sup>13</sup>C NMR** (101 MHz, Chloroform-*d*)  $\delta$  169.0, 164.6, 136.0, 135.4, 134.7, 133.6, 131.0, 130.0, 129.9, 128.9, 128.8, 128.1, 126.9, 120.5, 74.0, 52.9.

**HRMS(ESI)**  $m/z$ : [ $M+H$ ]<sup>+</sup> Calculated for C<sub>18</sub>H<sub>15</sub>ClO<sub>4</sub> 331.0732; Found 331.0730.

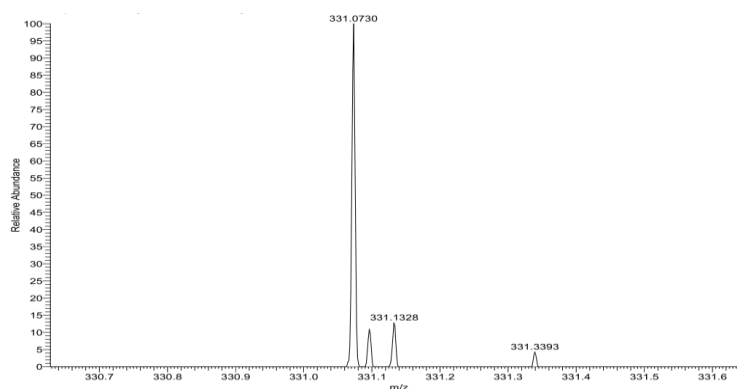

### (*R,E*)-1-methoxy-1-oxo-4-phenylbut-3-en-2-yl 2-naphthoate (**3ja**)

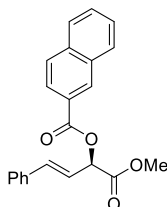

Prepared according to general procedure from Rh<sub>2</sub>(TFA)<sub>4</sub> (2.6 mg, 0.004 mmol, 2 mol%), CPA1 (5.8 mg, 0.01 mmol, 5 mol%), 2-naphthoic acid (34.4 mg, 0.2 mmol, 1.0 equiv) and methyl (*E*)-2-diazo-4-phenylbut-3-enoate (80.8 mg, 0.4 mmol, 2.0 equiv) in *n*-pentane (4 mL) at rt for 5 min. The desired product was purified by silica gel column chromatography (Petroleum ether: ethyl acetate = 20:1-5:1) and obtained as yellow oil (20.8 mg, 30%).

**R<sub>f</sub>** (Petroleum ether/ EtOAc = 20:1) = 0.3.

**HPLC** (IC, *i*-PrOH/*n*-hexane = 10/90, flow rate = 1 mL/min,  $\lambda$  = 215 nm)  $t_R$  = 22.623 min (major), 13.509 min (minor), 92% ee.

**[ $\alpha$ ]<sub>D</sub><sup>25</sup>**: -32.800 (c = 0.2, CH<sub>2</sub>Cl<sub>2</sub>).

**<sup>1</sup>H NMR** (400 MHz, Chloroform-*d*)  $\delta$  8.72 (t,  $J$  = 1.2 Hz, 1H), 8.14 (dd,  $J$  = 8.4, 1.6 Hz, 1H), 7.98 (d,  $J$  = 8.0 Hz, 1H), 7.90 (t,  $J$  = 8.8 Hz, 2H), 7.63-7.53 (m, 2H), 7.48-7.45 (m, 2H), 7.40-7.30 (m, 3H), 6.95 (d,  $J$  = 17.2 Hz, 1H), 6.46 (dd,  $J$  = 16.0, 7.2 Hz, 1H), 5.94 (dd,  $J$  = 7.2, 1.2 Hz, 1H), 3.83 (s, 3H).

**<sup>13</sup>C NMR** (101 MHz, Chloroform-*d*)  $\delta$  169.3, 165.9, 135.8, 135.7, 135.6, 132.5, 131.7, 129.5, 128.8, 128.7, 128.6, 128.4, 127.9, 127.0, 126.8, 126.5, 125.4, 121.0, 73.8, 52.8.

**HRMS(ESI) m/z:** [M+H]<sup>+</sup> Calculated for C<sub>22</sub>H<sub>18</sub>O<sub>4</sub> 347.1278; Found 347.1276.

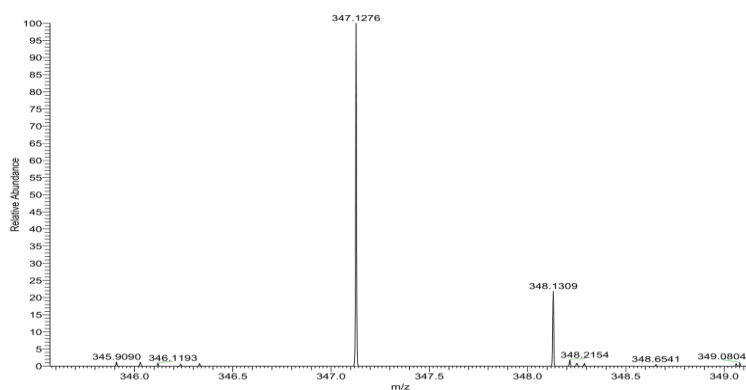

**methyl (*R,E*)-2-(cinnamoyloxy)-4-phenylbut-3-enoate<sup>[2]</sup> (3ka)**

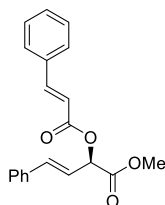

Prepared according to general procedure from Rh<sub>2</sub>(TFA)<sub>4</sub> (2.6 mg, 0.004 mmol, 2 mol%), CPA1 (5.8 mg, 0.01 mmol, 5 mol%), cinnamic acid (29.6 mg, 0.2 mmol, 1.0 equiv) and methyl (*E*)-2-diazo-4-phenylbut-3-enoate (80.8 mg, 0.4 mmol, 2.0 equiv) in *n*-pentane (4 mL) at rt for 5 min. The desired product was purified by silica gel column chromatography (Petroleum ether: ethyl acetate = 20:1-5:1) and obtained as yellow oil (37.4 mg, 58%).

**R<sub>f</sub>** (Petroleum ether/ EtOAc = 20:1) = 0.3.

**HPLC** (IA, *i*-PrOH/*n*-hexane = 10/90, flow rate = 1 mL/min, λ = 215 nm) t<sub>R</sub> = 14.299 min (major), 16.249 min (minor), 82% ee.

**[α]<sub>D</sub><sup>25</sup>:** -45.800 (c = 0.2, CH<sub>2</sub>Cl<sub>2</sub>).

**<sup>1</sup>H NMR** (400 MHz, Chloroform-*d*) δ 7.81 (d, *J* = 16.0 Hz, 1H), 7.57-7.54 (m, 2H), 7.45-7.42 (m, 2H), 7.41-7.39 (m, 3H), 7.37-7.33 (m, 3H), 6.87 (dd, *J* = 16.0, 1.6 Hz, 1H), 6.58 (d, *J* = 16.0 Hz, 1H), 6.34 (dd, *J* = 16.0, 7.2 Hz, 1H), 5.78 (dd, *J* = 7.2, 1.6 Hz, 1H), 3.81 (s, 3H).

**<sup>13</sup>C NMR** (101 MHz, Chloroform-*d*) δ 169.3, 166.0, 146.4, 135.6, 135.5, 134.2, 130.7, 129.0, 128.7, 128.6, 128.3, 126.9, 120.9, 116.9, 73.3, 52.8.

**methyl (*R,E*)-2-acetoxy-4-phenylbut-3-enoate<sup>[2]</sup> (3la)**

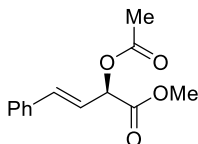

Prepared according to general procedure from Rh<sub>2</sub>(TFA)<sub>4</sub> (2.6 mg, 0.004 mmol, 2 mol%), C1 (5.8 mg, 0.01 mmol, 5 mol%), acetic acid (12 mg, 0.2 mmol, 1.0 equiv) and methyl (*E*)-2-diazo-4-phenylbut-3-enoate (80.8 mg, 0.4 mmol, 2.0 equiv) in *n*-pentane (4 mL) at rt for 5-15 min. The desired product was purified by silica gel column chromatography (Petroleum ether: ethyl acetate = 20:1-5:1) and obtained as yellow oil (43.1 mg, 92%).

**R<sub>f</sub>** (Petroleum ether/ EtOAc = 20:1) = 0.3.

**HPLC** (IA, *i*-PrOH/*n*-hexane = 10/90, flow rate = 1 mL/min,  $\lambda$  = 215 nm)  $t_R$  = 11.581 min (major), 9.075 min (minor), 73% ee.

$[\alpha]_D^{25}$ : -53.400 (c = 0.2, CH<sub>2</sub>Cl<sub>2</sub>).

**<sup>1</sup>H NMR** (400 MHz, Chloroform-*d*)  $\delta$  7.42-7.40 (m, 2H), 7.36 – 7.29 (m, 3H), 6.81 (d, *J* = 14.8 Hz, 1H), 6.26 (dd, *J* = 16.0, 7.2 Hz, 1H), 5.63 (dd, *J* = 7.2, 1.2 Hz, 1H), 3.78 (s, 3H), 2.20 (s, 3H).

**<sup>13</sup>C NMR** (101 MHz, Chloroform-*d*)  $\delta$  170.2, 169.2, 135.5, 135.4, 128.7, 128.65, 126.9, 120.7, 73.2, 52.8, 20.8.

### benzyl (*R,E*)-2-acetoxy-4-phenylbut-3-enoate (**3lc**)

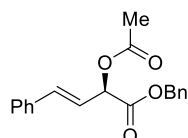

Prepared according to general procedure from Rh<sub>2</sub>(TFA)<sub>4</sub> (2.6 mg, 0.004 mmol, 2 mol%), **C1** (5.8 mg, 0.01 mmol, 5 mol%), acetic acid (12 mg, 0.2 mmol, 1.0 equiv) and benzyl (*E*)-2-diazo-4-phenylbut-3-enoate (111.2 mg, 0.4 mmol, 2.0 equiv) in *n*-pentane (4 mL) at rt for 5-15 min. The desired product was purified by silica gel column chromatography (Petroleum ether: ethyl acetate = 20:1-5:1) and obtained as colorless oil (52.1. mg, 84%).

**R<sub>f</sub>** (Petroleum ether/ EtOAc = 20:1) = 0.3.

**HPLC** (IA, *i*-PrOH/*n*-hexane = 1/99, flow rate = 1 mL/min,  $\lambda$  = 215 nm)  $t_R$  = 12.414 min (major), 13.794 min (minor), 82% ee.

$[\alpha]_D^{25}$ : -57.500 (c = 0.2, CH<sub>2</sub>Cl<sub>2</sub>).

**<sup>1</sup>H NMR** (400 MHz, Chloroform-*d*)  $\delta$  7.39 – 7.27 (m, 10H), 6.80 (dd, *J* = 16.0, 1.2 Hz, 1H), 6.25 (dd, *J* = 16.0, 7.2 Hz, 1H), 5.66 (dd, *J* = 7.2, 1.6 Hz, 1H), 5.22 (d, *J* = 2.8 Hz, 2H), 2.19 (s, 3H).

**<sup>13</sup>C NMR** (101 MHz, Chloroform-*d*)  $\delta$  170.2, 168.61, 135.6, 135.4, 135.2, 128.7, 128.6, 128.6, 128.5, 128.2, 126.9, 120.7, 73.2, 67.4, 20.8.

**HRMS (ESI)** *m/z*: [M+Na]<sup>+</sup> Calculated for C<sub>19</sub>H<sub>18</sub>O<sub>4</sub> 333.1097; Found 333.1096.

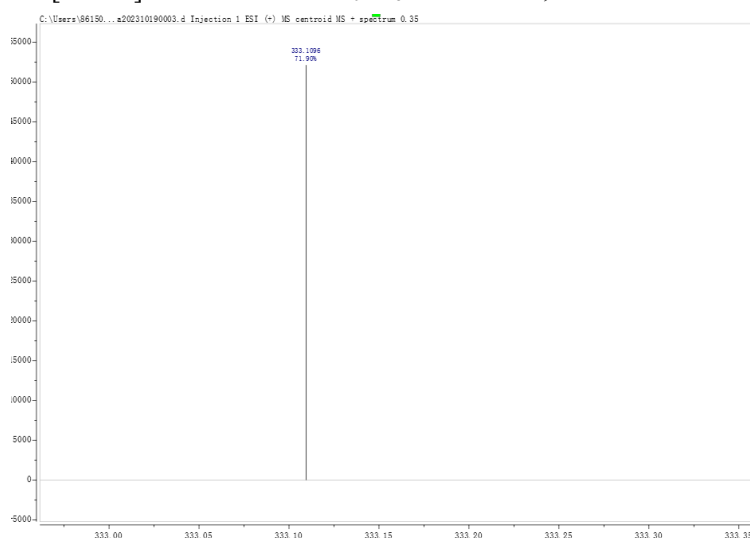

### tert-butyl (*R,E*)-2-acetoxy-4-phenylbut-3-enoate<sup>[3]</sup> (**3ld**)

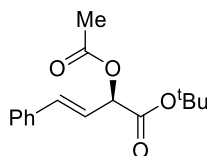

Prepared according to general procedure from  $\text{Rh}_2(\text{TFA})_4$  (2.6 mg, 0.004 mmol, 2 mol%), CPA1 (5.8 mg, 0.01 mmol, 5 mol%), acetic acid (12 mg, 0.2 mmol, 1.0 equiv) and tert-butyl (*E*)-2-diazo-4-phenylbut-3-enoate (97.6 mg, 0.4 mmol, 2.0 equiv) in *n*-pentane (4 mL) at rt for 5 min. The desired product was purified by silica gel column chromatography (Petroleum ether: ethyl acetate = 20:1-5:1) and obtained as colorless oil (34.0 mg, 62%).

$R_f$  (Petroleum ether/ EtOAc = 20:1) = 0.3.

**HPLC** (IA, *i*-PrOH/*n*-hexane = 1/99, flow rate = 1 mL/min,  $\lambda$  = 215 nm)  $t_R$  = 5.833 min (major), 6.275 min (minor), 86% ee.

$[\alpha]_D^{25}$ : -17.600 ( $c$  = 0.2,  $\text{CH}_2\text{Cl}_2$ ).

**$^1\text{H NMR}$**  (400 MHz, Chloroform-*d*)  $\delta$  7.43-7.39 (m, 2H), 7.36-7.28 (m, 3H), 6.80 (d,  $J$  = 16.0 Hz, 1H), 6.25 (dd,  $J$  = 16.0, 6.8 Hz, 1H), 5.49 (dd,  $J$  = 6.8, 1.2 Hz, 1H), 2.20 (s, 3H), 1.48 (s, 9H).

**$^{13}\text{C NMR}$**  (101 MHz, Chloroform-*d*)  $\delta$  170.2, 167.8, 135.8, 134.7, 128.7, 128.5, 126.8, 121.3, 82.8, 73.7, 28.0, 20.8.

**(*R,E*)-1-methoxy-1-oxo-4-phenylbut-3-en-2-yl cyclopentanecarboxylate<sup>[2]</sup> (3ma)**

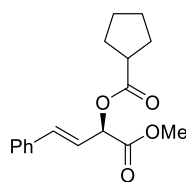

Prepared according to general procedure from  $\text{Rh}_2(\text{TFA})_4$  (2.6 mg, 0.004 mmol, 2 mol%), C1 (5.8 mg, 0.01 mmol, 5 mol%), cyclopentanecarboxylic acid (22.8 mg, 0.2 mmol, 1.0 equiv) and methyl (*E*)-2-diazo-4-phenylbut-3-enoate (80.8 mg, 0.4 mmol, 2.0 equiv) in *n*-pentane (4 mL) at rt for 5-15 min. The desired product was purified by silica gel column chromatography (Petroleum ether: ethyl acetate = 20:1-5:1) and obtained as yellow oil (35.7 mg, 62%).

$R_f$  (Petroleum ether/ EtOAc = 20:1) = 0.3.

**HPLC** (IA, *i*-PrOH/*n*-hexane = 10/90, flow rate = 1 mL/min,  $\lambda$  = 215 nm)  $t_R$  = 5.678 min (major), 6.462 min (minor), 80% ee.

$[\alpha]_D^{25}$ : -43.100 ( $c$  = 0.2,  $\text{CH}_2\text{Cl}_2$ ).

**$^1\text{H NMR}$**  (400 MHz, Chloroform-*d*)  $\delta$  7.42 – 7.39 (m, 2H), 7.36 – 7.26 (m, 3H), 6.80 (d,  $J$  = 16.0 Hz, 1H), 6.28 (dd,  $J$  = 16.0, 7.2 Hz, 1H), 5.62 (dd,  $J$  = 7.2, 1.6 Hz, 1H), 3.77 (s, 3H), 2.94 – 2.86 (m, 1H), 2.00 – 1.85 (m, 4H), 1.77-1.69 (m, 2H), 1.65-1.57 (m, 2H).

**$^{13}\text{C NMR}$**  (101 MHz, Chloroform-*d*)  $\delta$  176.0, 169.4, 135.6, 135.1, 128.7, 128.6, 126.9, 121.0, 72.9, 52.7, 43.5, 30.1, 29.8, 25.9, 25.9.

**(*R,E*)-1-methoxy-1-oxo-4-phenylbut-3-en-2-yl cyclohexanecarboxylate<sup>[2]</sup> (3na)**



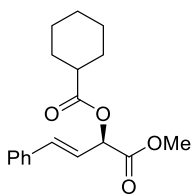

Prepared according to general procedure from  $\text{Rh}_2(\text{TFA})_4$  (2.6 mg, 0.004 mmol, 2 mol%), CPA1 (5.8 mg, 0.01 mmol, 5 mol%), cyclohexanecarboxylic acid (25.6 mg, 0.2 mmol, 1.0 equiv) and methyl (*E*)-2-diazo-4-phenylbut-3-enoate (80.8 mg, 0.4 mmol, 2.0 equiv) in *n*-pentane (4 mL) at rt for 5 min. The desired product was purified by silica gel column chromatography (Petroleum ether: ethyl acetate = 20:1-5:1) and obtained as yellow oil (47.1 mg, 78%).

$R_f$  (Petroleum ether/ EtOAc = 20:1) = 0.3.

**HPLC** (IA, *i*-PrOH/*n*-hexane = 10/90, flow rate = 1 mL/min,  $\lambda$  = 215 nm)  $t_R$  = 5.585 min (major), 6.321 min (minor), 90% ee.

$[\alpha]_D^{25}$ : -147.760 ( $c$  = 0.2,  $\text{CH}_2\text{Cl}_2$ ).

**$^1\text{H NMR}$**  (400 MHz, Chloroform-*d*)  $\delta$  7.40 (d,  $J$  = 1.6 Hz, 2H), 7.35-7.28 (m, 3H), 6.80 (d,  $J$  = 14.8 Hz, 1H), 6.27 (dd,  $J$  = 16.0, 6.8 Hz, 1H), 5.62 (dd,  $J$  = 6.8, 1.2 Hz, 1H), 3.77 (s, 3H), 2.51-2.44 (m, 1H), 2.05-1.94 (m, 2H), 1.80-1.76 (m, 2H), 1.69-1.63 (m, 1H), 1.57-1.48 (m, 2H), 1.38-1.26 (m, 3H).

**$^{13}\text{C NMR}$**  (101 MHz,  $\text{CDCl}_3$ )  $\delta$  175.2, 169.3, 135.6, 135.1, 128.7, 128.6, 126.9, 121.0, 72.8, 52.7, 42.9, 29.0, 28.8, 25.7, 25.4, 25.3.

## 6. Further Transformation

### Hydrogenation of 3ad to ester 4ad

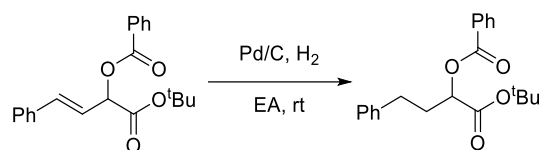

3ad (64.3 mg, 0.19 mmol) was dissolved in EA (4.0 mL), then 10% Pd/C (20 wt%) was added. The resulting solution was stirred at rt under atmosphere of H<sub>2</sub> (balloon) for overnight. After completion, purification by flash chromatography on silica gel (petroleum ether/ethyl acetate = 20:1) gave the product 4ad in 91% yield with 97% ee as white solid. mp: 61-62 °C.

### 1-(tert-butoxy)-1-oxo-4-phenylbutan-2-yl benzoate (4ad)

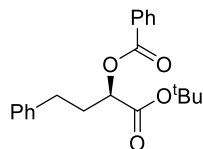

**R<sub>f</sub>** (Petroleum ether/ EtOAc = 20:1) = 0.4.

**HPLC** (IE, *i*-PrOH/*n*-hexane = 0.5/99.5, flow rate = 1 mL/min, λ = 215 nm) *t<sub>R</sub>* = 15.180 min (major), 14.249 min (minor), 97% ee.

**[α]<sub>D</sub><sup>25</sup>**: 27.200 (c = 0.2, CH<sub>2</sub>Cl<sub>2</sub>).

**<sup>1</sup>H NMR** (400 MHz, Chloroform-*d*) δ 8.09-8.06 (m, 2H), 7.60-7.55 (m, 1H), 7.47-7.43 (m, 2H), 7.32-7.28 (m, 2H), 7.24-7.20 (m, 3H), 5.14 (dd, *J* = 8.0, 4.0 Hz, 1H), 2.84 (dd, *J* = 12.0, 8.0 Hz, 2H), 2.32-2.25 (m, 2H), 1.47 (s, 9H).

**<sup>13</sup>C NMR** (101 MHz, Chloroform-*d*) δ 169.2, 166.1, 140.8, 133.3, 129.9, 129.7, 128.6, 128.5, 128.4, 126.3, 82.3, 72.7, 33.0, 31.6, 28.0.

**HRMS(ESI)** *m/z*: [M+H]<sup>+</sup> Calculated for C<sub>21</sub>H<sub>25</sub>O<sub>4</sub> 341.1747; Found 341.1749.

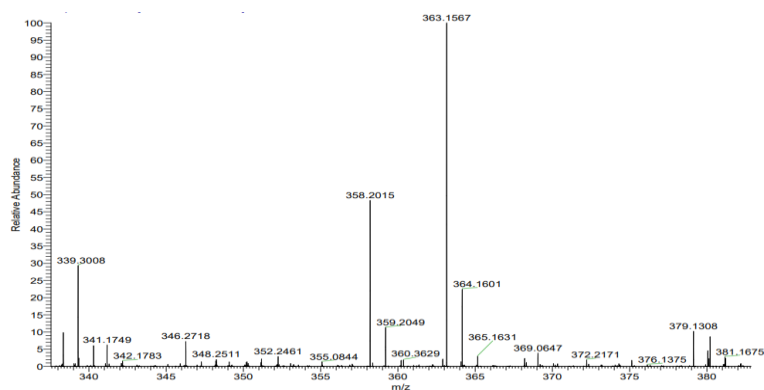

### Epoxidation of 3ad

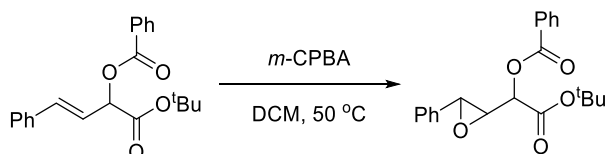

To an ice-bath cold solution of 3ad (40.0 mg, 0.1 mmol) in chloroform (2 mL) was added *m*-CPBA (30.6 mg, 0.15 mmol). The resulting mixture was stirred at room temperature for 12 h and then washed with a saturated sodium bicarbonate aqueous solution, brine, dried Na<sub>2</sub>SO<sub>4</sub> and concentrated. The crude oil was purified through chromatography (silica-gel, petroleum ether/ethyl acetate = 20:1) to give product 5ad in 74% yield as white solid. mp: 80-81°C.

### 2-(*tert*-butoxy)-2-oxo-1-(3-phenyloxiran-2-yl)ethyl benzoate (5ad)

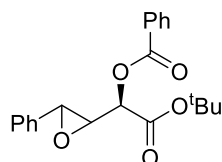

**R<sub>f</sub>** (Petroleum ether/ EtOAc = 20:1) = 0.2.

**HPLC** (IC, *i*-PrOH/*n*-hexane = 5/95, flow rate = 1 mL/min, λ = 215 nm) t<sub>R</sub> = 18.070 min (major), 9.820 min (minor), t<sub>R</sub>' = 13.994 min (major), 11.020 min (minor), 1.8/1 dr (96%/96% ee).

[α]<sub>D</sub><sup>25</sup>: -26.600(c = 0.2, CH<sub>2</sub>Cl<sub>2</sub>).

**<sup>1</sup>H NMR** (400 MHz, Chloroform-*d*) δ 8.16-8.13 (m, 2H), 7.50-7.44 (m, 3H), 7.40-7.34 (m, 5H), 5.18 (d, *J* = 6.0 Hz, 1H), 4.09 (d, *J* = 2.0 Hz, 1H), 3.54-3.52 (m, 1H), 1.49 (s, 9H).

**<sup>13</sup>C NMR** (101 MHz, Chloroform-*d*) δ 165.9, 165.7, 135.7, 133.6, 130.0, 129.1, 128.7, 128.6, 128.5, 125.7, 83.4, 73.6, 60.3, 56.3, 28.1.

**HRMS(ESI)** m/z: [M+H]<sup>+</sup> Calculated for C<sub>21</sub>H<sub>23</sub>O<sub>4</sub> 355.1540; Found 355.1539.

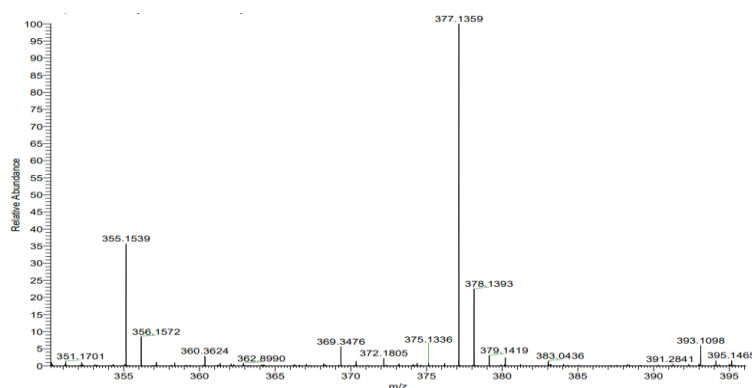

### Reduction of 3ak to diol 6ak

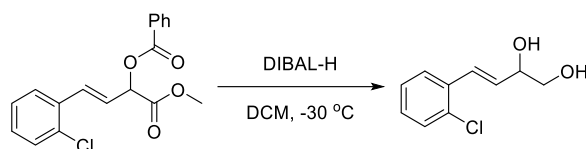

3ak (50 mg, 0.15 mmol, 1.0 equiv) was dissolved in anhydrous DCM (2 mL) under Ar in a 10 mL Schlenk tube. Then DIBAL-H (3.0 M in DCM, 0.2 mL, 0.6 mmol, 5 equiv) was added under Ar at -30 °C and stirred for 3 h. The resulting solution was quenched by the addition of sat. potassium sodium tartrate (aq.) and the biphasic mixture was stirred for 1 h at -30 °C. Then the reaction mixture was diluted with water and extracted with DCM. The combined organic layers were dried over Na<sub>2</sub>SO<sub>4</sub> and the solvent removed in vacuo. The crude product was purified by column chromatography (DCM/MeOH = 20:1) and gave allylic alcohol 6ak (19.0 mg, 64%) as yellow oil.

### (E)-4-(2-chlorophenyl)but-3-ene-1,2-diol (6ak)

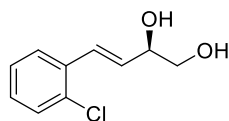

$R_f$  (DCM/MeOH = 20:1) = 0.2.

HPLC (IC, *i*-PrOH/*n*-hexane = 10/90, flow rate = 1 mL/min,  $\lambda$  = 215 nm)  $t_R$  = 11.208 min (major), 12.486 min (minor), 90% ee.

$[\alpha]_D^{25}$ : -9.500 ( $c$  = 0.2, CH<sub>2</sub>Cl<sub>2</sub>).

<sup>1</sup>H NMR (400 MHz, Chloroform-*d*)  $\delta$  7.54-7.49 (m, 1H), 7.37 – 7.32 (m, 1H), 7.24 – 7.16 (m, 2H), 7.08 (dd,  $J$  = 16.0, 1.6 Hz, 1H), 6.20 (dd,  $J$  = 16.0, 6.4 Hz, 1H), 4.50-4.046 (m, 1H), 3.78 (dd,  $J$  = 11.2, 3.2 Hz, 1H), 3.62 (dd,  $J$  = 11.2, 7.2 Hz, 1H), 2.83 (s, 1H), 2.57 (s, 1H).

<sup>13</sup>C NMR (101 MHz, Chloroform-*d*)  $\delta$  134.5, 133.2, 130.7, 129.8, 128.9, 128.3, 126.93, 126.9, 73.2, 66.4.

HRMS(ESI)  $m/z$ :  $[M+Na]^+$  Calculated for C<sub>10</sub>H<sub>11</sub>ClO<sub>2</sub> 221.0340; Found 221.0345.

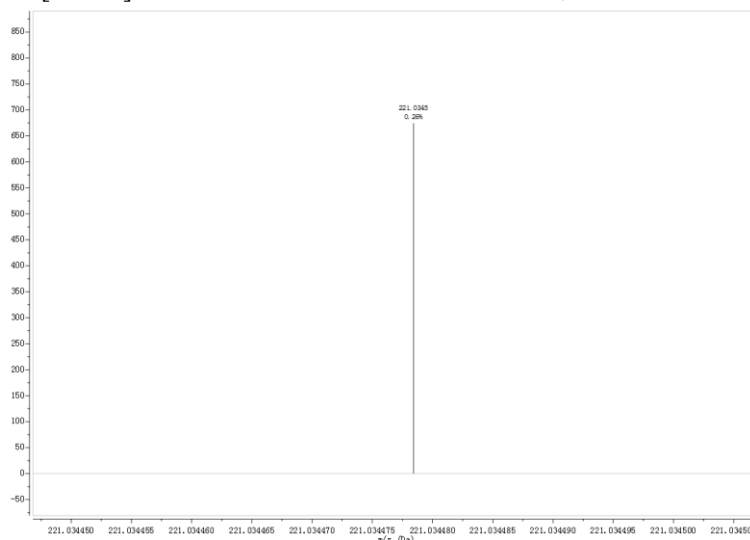

### Synthesis of diol 7ad

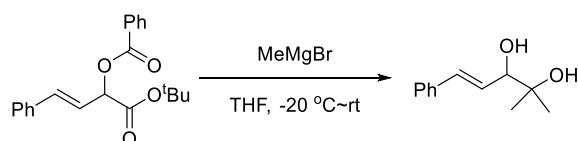

A solution of 3ad (50 mg, 0.15 mmol) in THF (2 mL) was injected into a 10 mL Schlenk tube filled with Ar. The solution was cooled down to -20 °C and allowed to stir for 15- 30 minutes. Thereafter, methyl magnesium bromide (0.3 mL, 3.0 mol/L in THF, 0.75 mmol, 5.0 equiv) was added dropwise. The formed mixture was stirred at -20 °C for 2 h. After heating to room temperature, the reaction continued to stir overnight and monitored by TLC analysis. After completion, the resulting mixture was quenched with saturated NH<sub>4</sub>Cl in H<sub>2</sub>O. The resulting solution was extracted with ethyl acetate to give a combined organic layer that was dried over anhydrous Na<sub>2</sub>SO<sub>4</sub>. Further purification by column chromatography on silica gel (DCM/MeOH = 20:1) afforded 7ad as colorless oil. (17.3 mg, 60% yield).

**(E)-2-methyl-5-phenylpent-4-ene-2,3-diol<sup>[2]</sup> (7ad)**

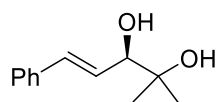

**R<sub>f</sub>** (DCM/MeOH = 20:1) = 0.2.

**HPLC** (IC, *i*-PrOH/*n*-hexane = 5/95, flow rate = 1 mL/min,  $\lambda$  = 215 nm)  $t_R$  = 14.769 min (major), 12.831 min (minor), 98% ee.

**[ $\alpha$ ]<sub>D</sub><sup>25</sup>**: 14.100(c = 0.2, CH<sub>2</sub>Cl<sub>2</sub>).

**<sup>1</sup>H NMR** (400 MHz, Chloroform-*d*)  $\delta$  7.41-7.38 (m, 2H), 7.35-7.30 (m, 2H), 7.28-7.26 (m, 1H), 6.66 (d,  $J$  = 14.8 Hz, 1H), 6.25 (dd,  $J$  = 16.0, 7.2 Hz, 1H), 4.09 (dd,  $J$  = 7.2, 1.6 Hz, 1H), 2.28 (s, 1H), 2.14 (s, 1H), 1.28 (s, 3H), 1.22 (s, 3H).

**<sup>13</sup>C NMR** (101 MHz, Chloroform-*d*)  $\delta$  136.5, 133.0, 128.6, 127.9, 127.8, 126.6, 79.8, 73.1, 26.5, 23.9.

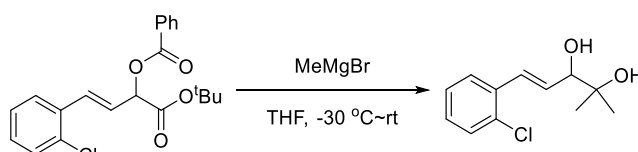

A solution of 3ak (50 mg, 0.15 mmol) in THF (2 mL) was injected into a 10 mL Schlenk tube filled with Ar. The solution was cooled down to -30 °C and allowed to stir for 15- 30 minutes. Thereafter, methyl magnesium bromide (0.3 mL, 3.0 mol/L in THF, 0.75 mmol, 5.0 equiv) was added dropwise. The formed mixture was stirred at -30 °C for 2 h. After heating to room temperature, the reaction continued to stir overnight and monitored by TLC analysis. After completion, the resulting mixture was quenched with saturated NH<sub>4</sub>Cl in H<sub>2</sub>O. The resulting solution was extracted with ethyl acetate to give a combined organic layer that was dried over anhydrous Na<sub>2</sub>SO<sub>4</sub>. Further purification by column chromatography on silica gel (DCM/MeOH = 20:1) afforded 7ak as colorless oil. (21.0 mg, 62% yield).

**(E)-5-(2-chlorophenyl)-2-methylpent-4-ene-2,3-diol (7ak)**

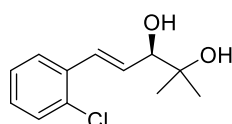

**R<sub>f</sub>** (DCM/MeOH = 20:1) = 0.2.

**HPLC** (IC, *i*-PrOH/*n*-hexane = 10/90, flow rate = 1 mL/min,  $\lambda$  = 215 nm)  $t_R$  = 7.864 min (major), 6.701 min (minor), 91% ee.

**[ $\alpha$ ]<sub>D</sub><sup>25</sup>**: 6.000(c = 0.2, CH<sub>2</sub>Cl<sub>2</sub>).

**<sup>1</sup>H NMR** (400 MHz, Chloroform-*d*)  $\delta$  7.54 – 7.51 (m, 1H), 7.37-7.34 (m, 1H), 7.25-7.16 (m, 2H), 7.03 (dd,  $J$  = 16.0, 1.2 Hz, 1H), 6.23 (dd,  $J$  = 16.0, 7.2 Hz, 1H), 4.12 (dd,  $J$  = 7.2, 1.2 Hz, 1H), 2.66 (s, 1H), 2.39 (d,  $J$  = 15.2 Hz, 1H), 1.29 (s, 3H), 1.22 (s, 3H).

**<sup>13</sup>C NMR** (101 MHz, Chloroform-*d*)  $\delta$  134.8, 133.2, 131.0, 129.7, 129.1, 128.9, 127.0, 126.9, 79.6, 73.1, 26.5, 24.0.

**HRMS(ESI)**  $m/z$ : [ $M+Na$ ]<sup>+</sup> Calculated for C<sub>12</sub>H<sub>15</sub>ClO<sub>2</sub> 249.0653; Found 249.0653.

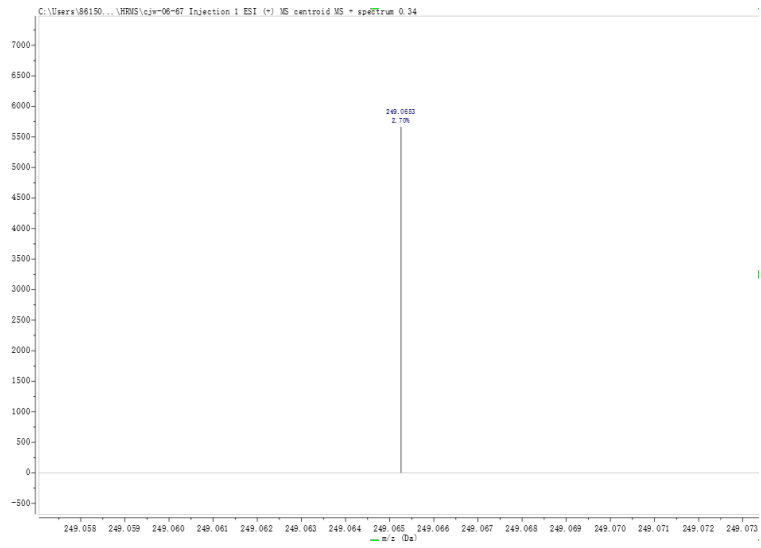

## 7. X-ray crystallographic data

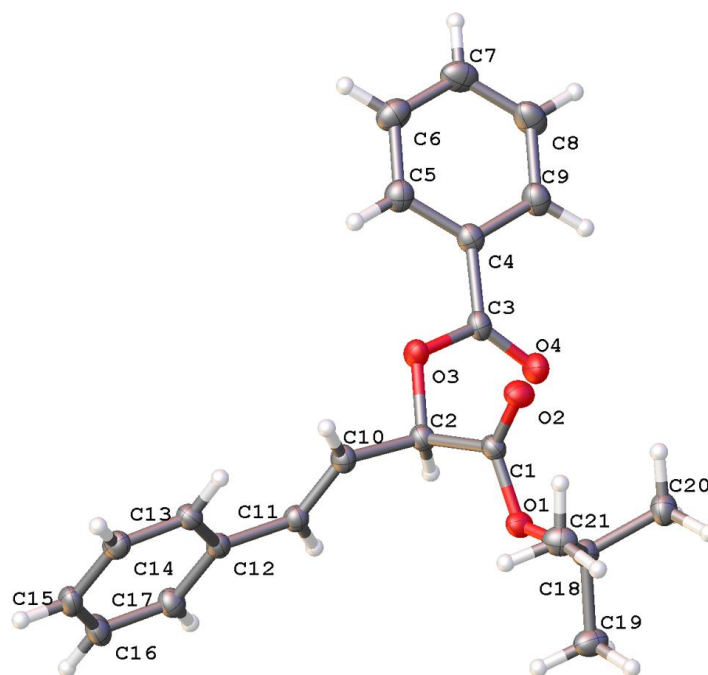

Figure S1. X-ray crystal structure of 3ad

Table S2 Crystal data and structure refinement for 3ad.

|                                 |                                                |                   |
|---------------------------------|------------------------------------------------|-------------------|
| Empirical formula               | C <sub>21</sub> H <sub>22</sub> O <sub>4</sub> |                   |
| Formula weight                  | 338.38                                         |                   |
| Temperature                     | 213.00 K                                       |                   |
| Wavelength                      | 1.34139 Å                                      |                   |
| Crystal system                  | Triclinic                                      |                   |
| Space group                     | P1                                             |                   |
| Unit cell dimensions            | a = 5.95320(10) Å                              | a = 90.0640(10)°. |
|                                 | b = 10.2293(2) Å                               | b = 93.1930(10)°. |
|                                 | c = 22.7669(4) Å                               | g = 92.5580(10)°. |
| Volume                          | 1382.90(4) Å <sup>3</sup>                      |                   |
| Z                               | 3                                              |                   |
| Density (calculated)            | 1.219 Mg/m <sup>3</sup>                        |                   |
| Absorption coefficient          | 0.431 mm <sup>-1</sup>                         |                   |
| F(000)                          | 540                                            |                   |
| Crystal size                    | 0.07 x 0.07 x 0.05 mm <sup>3</sup>             |                   |
| Theta range for data collection | 3.383 to 54.990°.                              |                   |
| Index ranges                    | -7 <= h <= 7, -12 <= k <= 12, -27 <= l <= 27   |                   |
| Reflections collected           | 43148                                          |                   |
| Independent reflections         | 10370 [R(int) = 0.0562]                        |                   |

|                                   |                                             |
|-----------------------------------|---------------------------------------------|
| Completeness to theta = 53.594°   | 99.4 %                                      |
| Absorption correction             | Semi-empirical from equivalents             |
| Max. and min. transmission        | 0.7508 and 0.4930                           |
| Refinement method                 | Full-matrix least-squares on F <sup>2</sup> |
| Data / restraints / parameters    | 10370 / 3 / 685                             |
| Goodness-of-fit on F <sup>2</sup> | 1.029                                       |
| Final R indices [I>2sigma(I)]     | R1 = 0.0322, wR2 = 0.0817                   |
| R indices (all data)              | R1 = 0.0339, wR2 = 0.0831                   |
| Absolute structure parameter      | 0.17(7)                                     |
| Extinction coefficient            | n/a                                         |
| Largest diff. peak and hole       | 0.108 and -0.138 e.Å <sup>-3</sup>          |



## 8. References

- [1] (a) Shim, S. Y.; Cho, S. M.; Venkateswarlu, A.; Ryu, D. H. *Angew. Chem. Int. Ed.* **2017**, *56*, 8585.  
(b) Zha, G.-F.; Han, J.-B.; Hu, X.-Q.; Qin, H.-L.; Fang, W.-Y.; Zhang, C.-P. *Chem. Commun.* **2016**, *52*, 7458.
- [2] Xu, Y.-Y.; Gao, Z.-H.; Li, C.-B.; Ye, S. *Angew. Chem. Int. Ed.* **2023**, *62*, e202218362.
- [3] Xia, C.; Shen, J.-F.; Liu, D.-L.; Zhang, W.-B. *Org. Lett.* **2017**, *19*, 4251.
- [4] Pisella, G.; Gagnebin, A.; Waser, J. *Org. Lett.* **2020**, *22*, 3884.
- [5] Kimberly M. S.; Michael T. C.; C. Guy. G.; Jeffrey S. J. *J. Am. Chem. Soc.* **2012**, *134*, 20197.

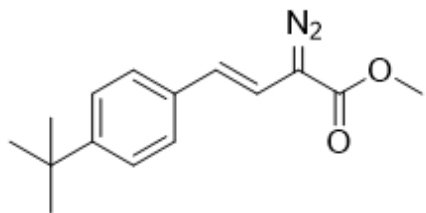

400MHz, CDCl<sub>3</sub>

2f

7.332  
7.327  
7.316  
7.311  
7.306  
7.283  
7.277  
7.267  
7.262

6.440  
6.399  
6.182  
6.141

3.814

1.300

5 9.0 8.5 8.0 7.5 7.0 6.5 6.0 5.5 5.0 4.5 4.0 3.5 3.0 2.5 2.0 1.5 1.0 0.5 0.0 -0

f1 (ppm)  
S32

4.10

1.02

1.04

3.00

9.07

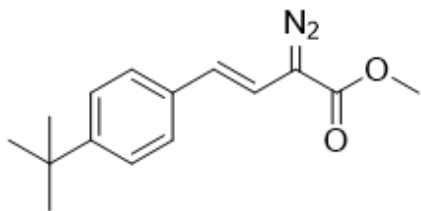

100MHz, CDCl<sub>3</sub>

2f

—165.795

—150.245

—134.091

—125.908

—125.674

—125.491

—123.056

—110.240

—52.335

—34.592

—31.331

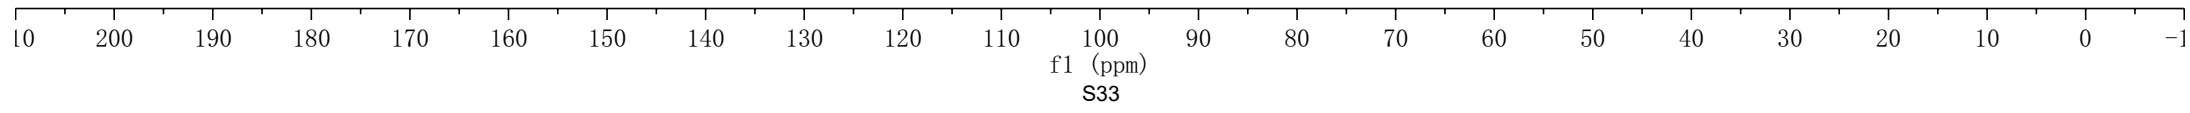

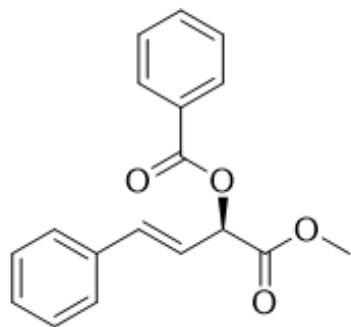

400MHz, CDCl<sub>3</sub>

3aa

8.155  
8.152  
8.148  
8.139  
8.134  
8.130  
7.617  
7.614  
7.611  
7.601  
7.596  
7.591  
7.580  
7.577  
7.574  
7.490  
7.486  
7.473  
7.470  
7.466  
7.456  
7.451  
7.447  
7.438  
7.434  
7.431  
7.370  
7.366  
7.349  
7.345  
7.334  
7.330  
7.310  
7.292  
6.931  
6.928  
6.891  
6.888  
6.432  
6.414  
6.392  
6.374  
5.886  
5.883  
5.868  
5.865  
3.819  
3.807  
3.797

0.000

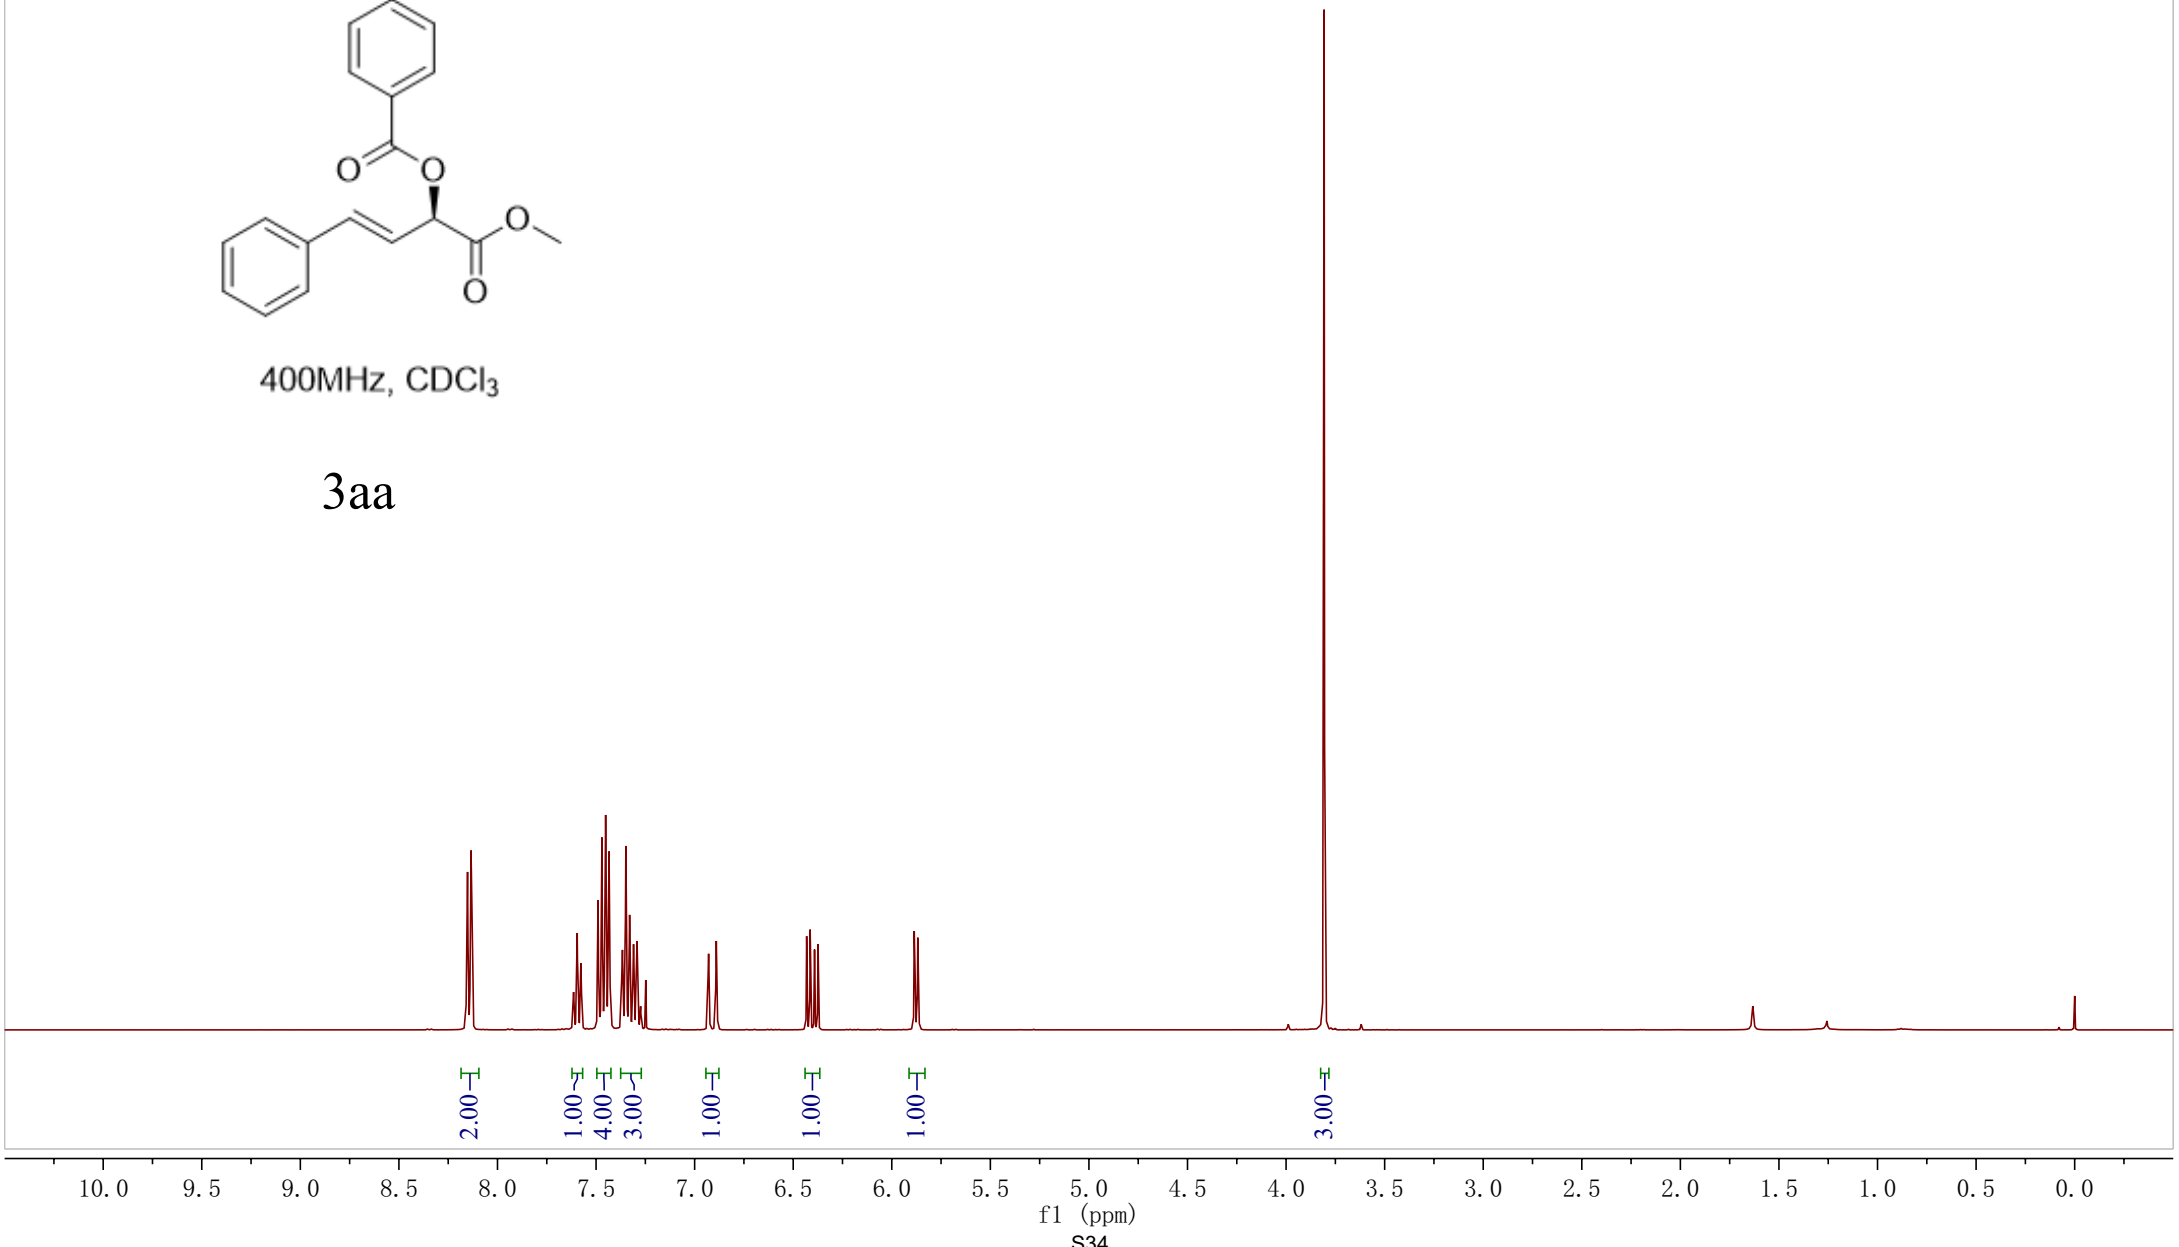

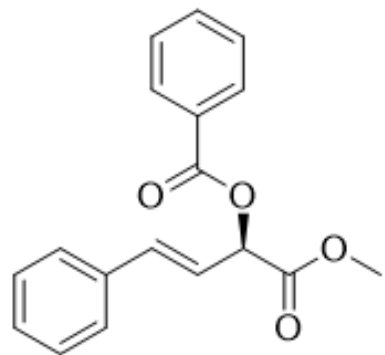

100MHz, CDCl<sub>3</sub>

3aa

— 169.188  
— 165.726

135.575  
135.508  
133.536  
130.007  
129.293  
128.739  
128.660  
128.519  
126.916  
120.928

— 73.616

— 52.774

10 200 190 180 170 160 150 140 130 120 110 100 90 80 70 60 50 40 30 20 10 0 -1  
f1 (ppm)  
S35

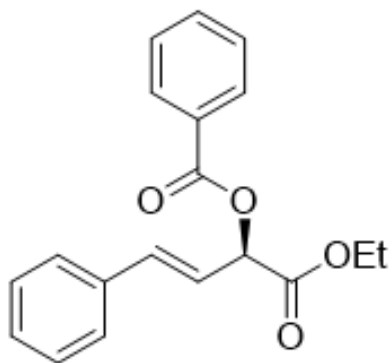

400MHz, CDCl<sub>3</sub>

3ab

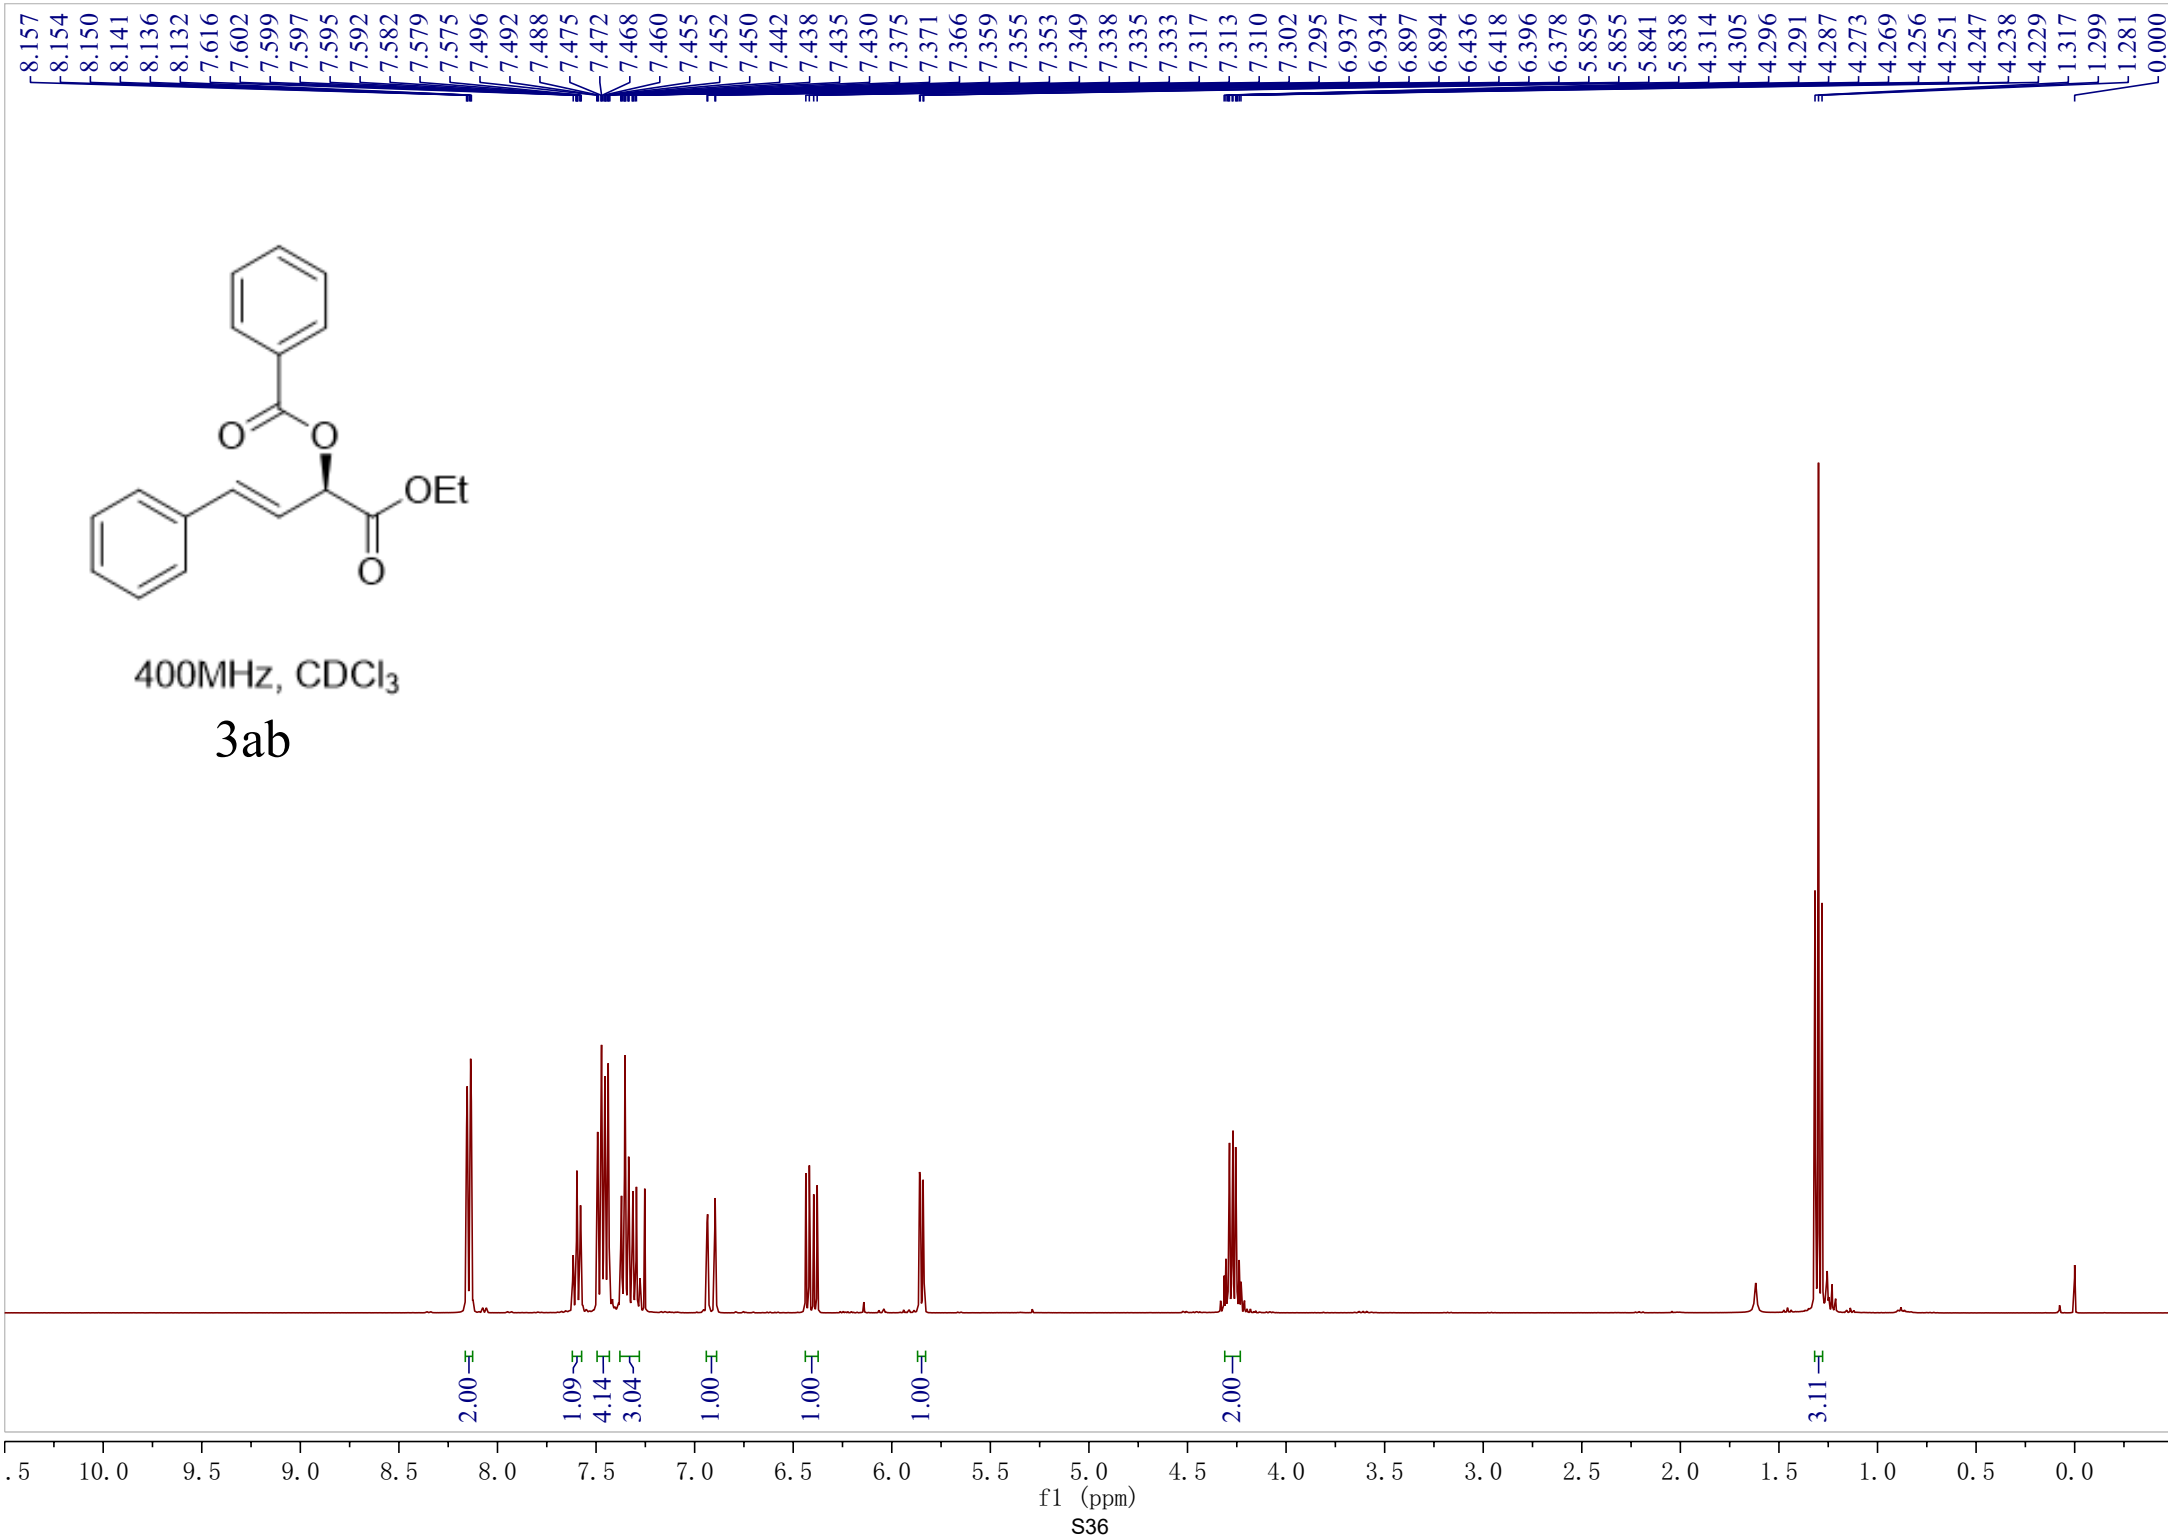

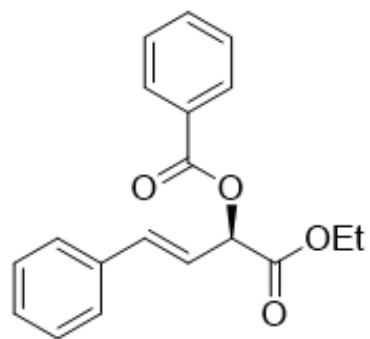

100MHz, CDCl<sub>3</sub>

3ab

— 168.697  
— 165.756

— 135.663  
— 135.325  
— 133.486  
— 129.985  
— 129.364  
— 128.729  
— 128.604  
— 128.501  
— 126.898  
— 121.076

— 73.726

— 61.900

— 14.158

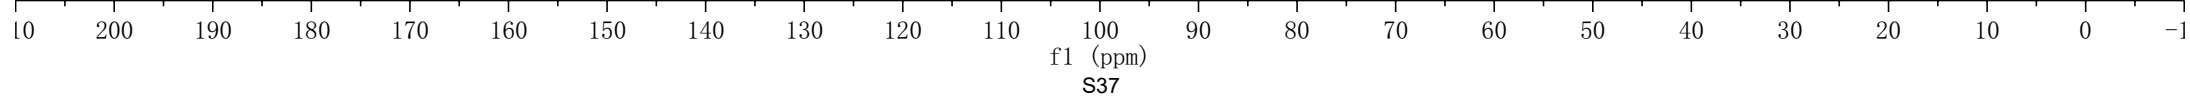

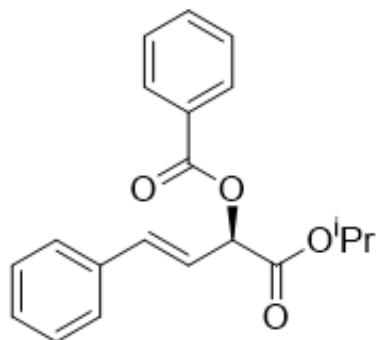

400MHz, CDCl<sub>3</sub>

3ac

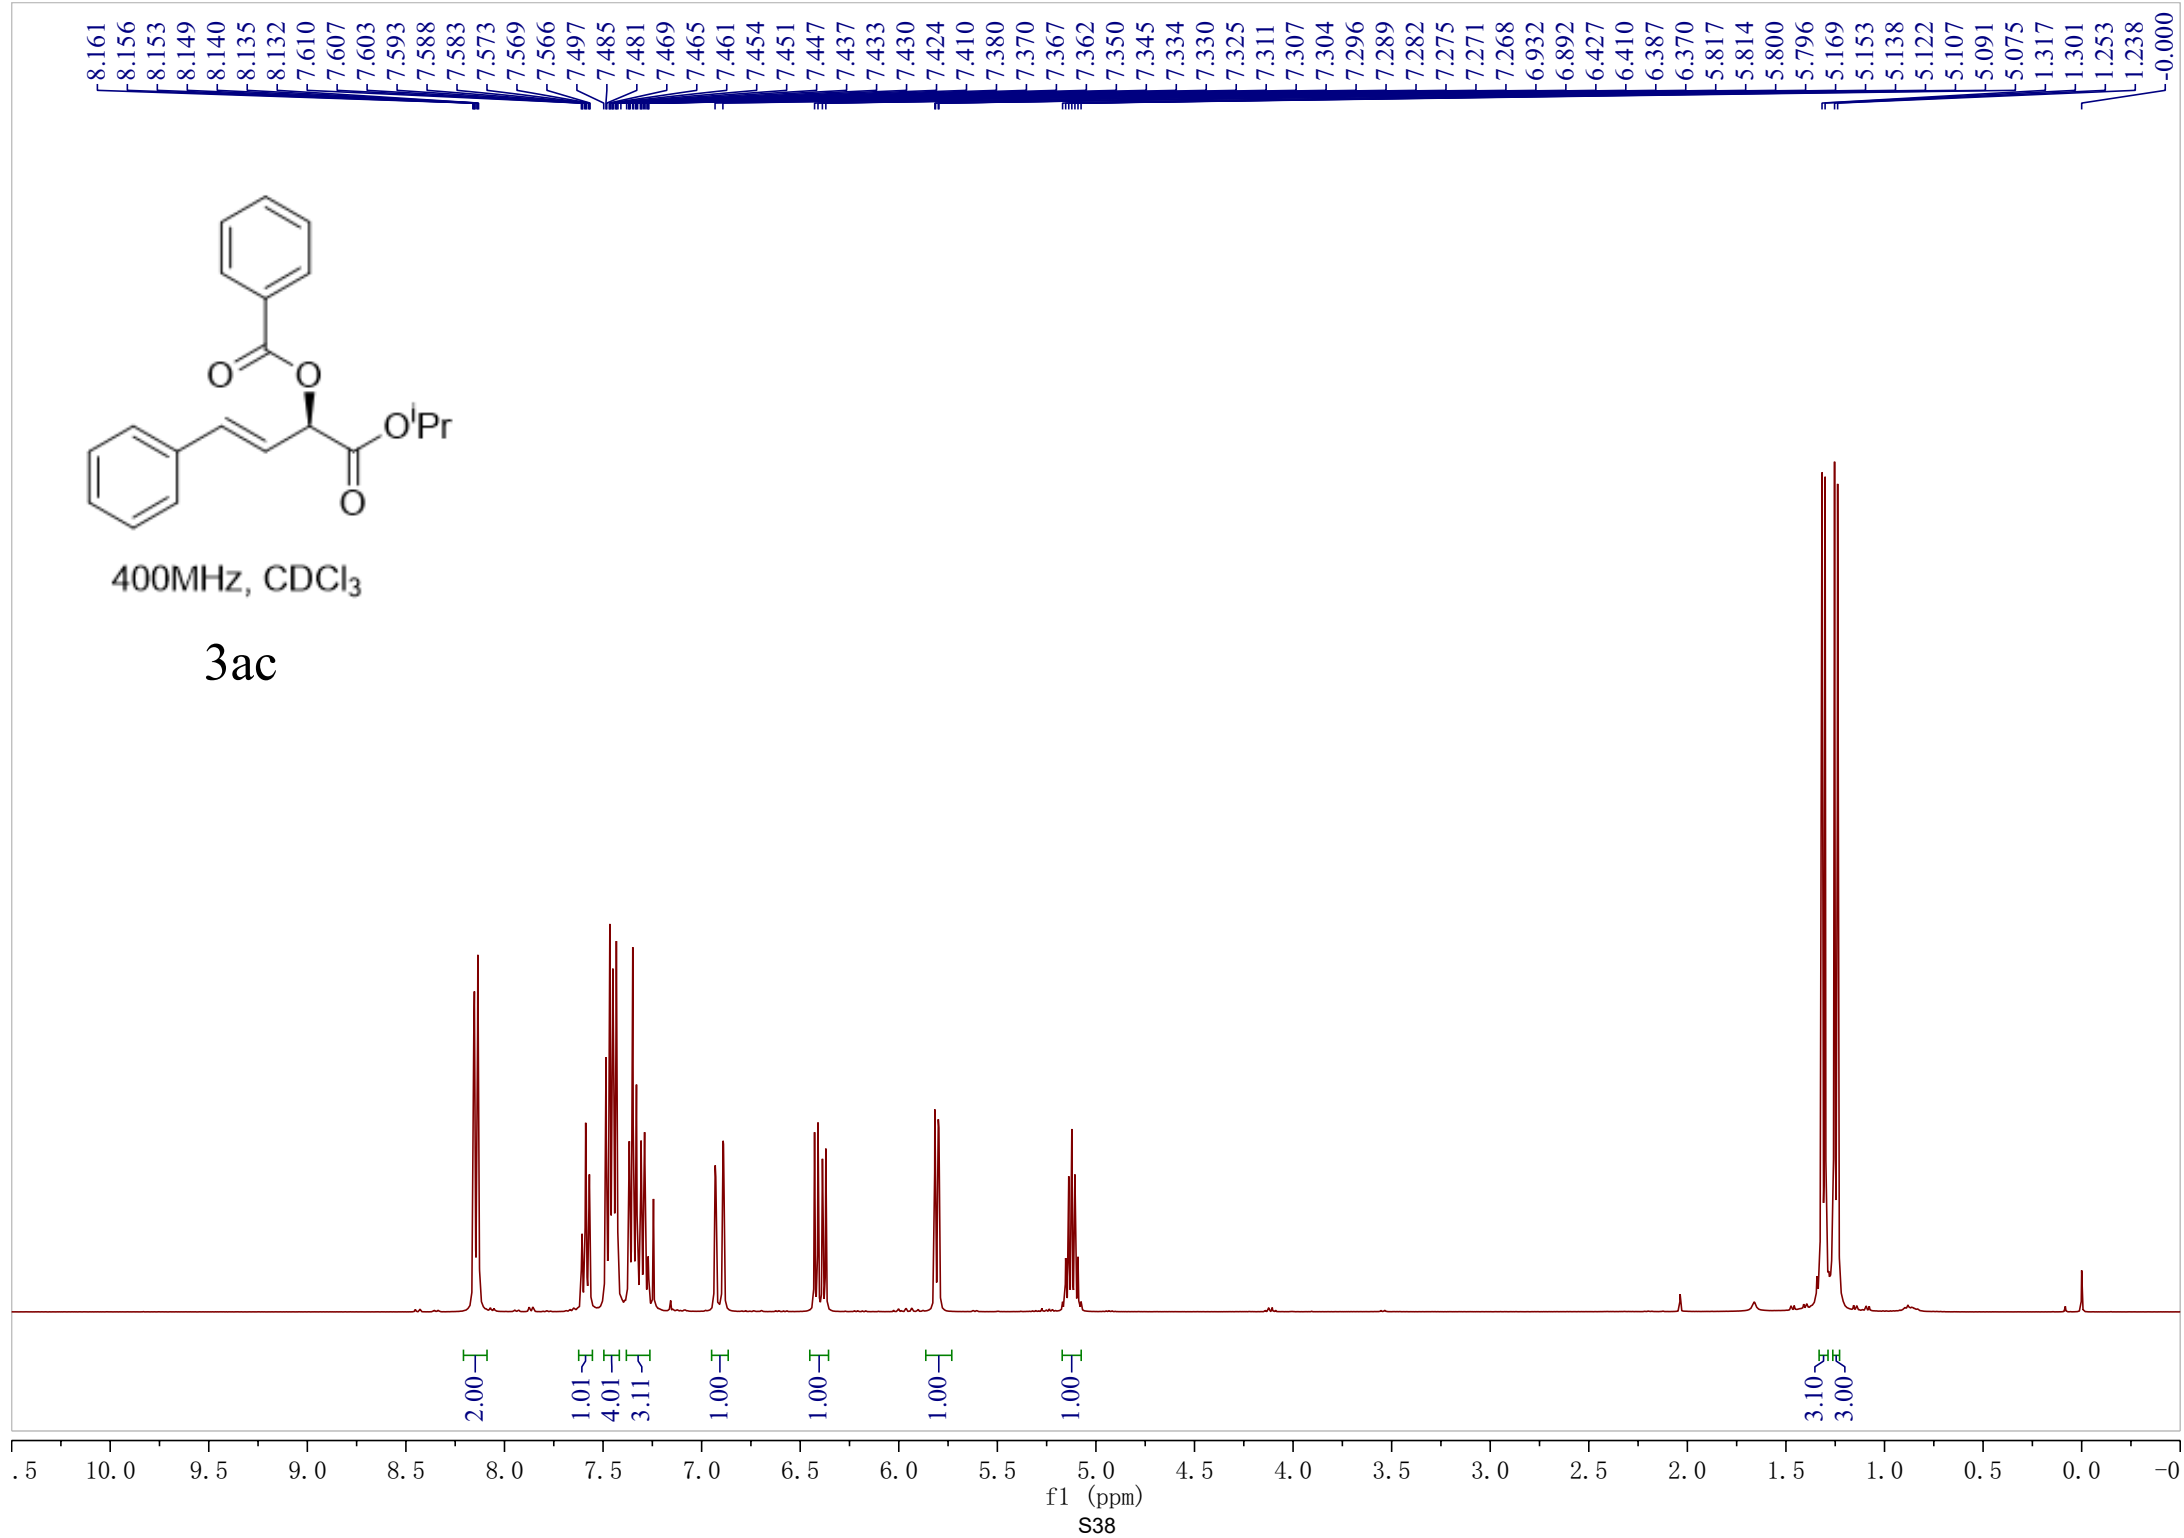



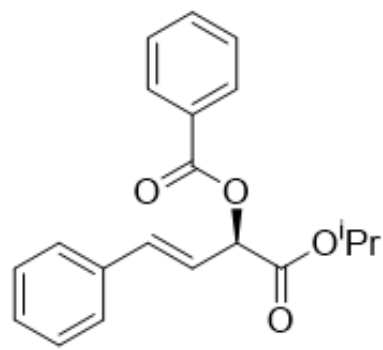

100MHz, CDCl<sub>3</sub>

3ac

168.261  
165.831

135.830  
135.223  
133.509  
130.029  
129.524  
128.795  
128.624  
128.562  
126.953  
121.271

73.929  
69.741

21.835  
21.752

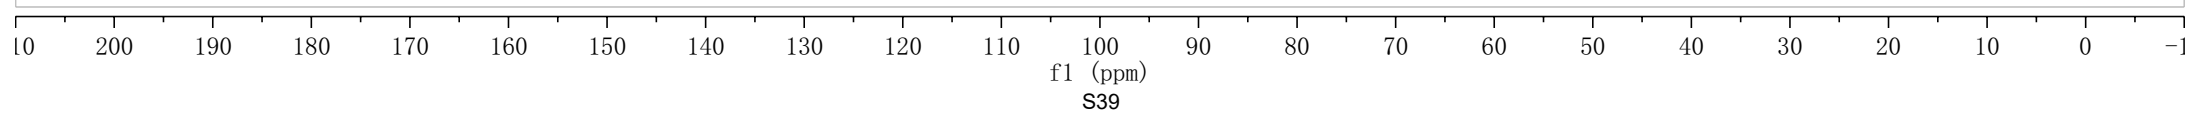

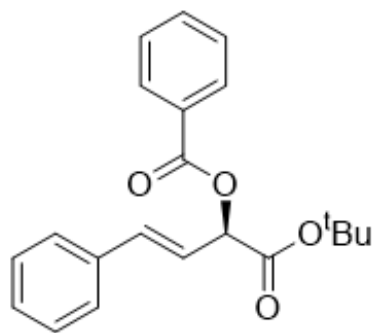

400MHz, CDCl<sub>3</sub>

3ad

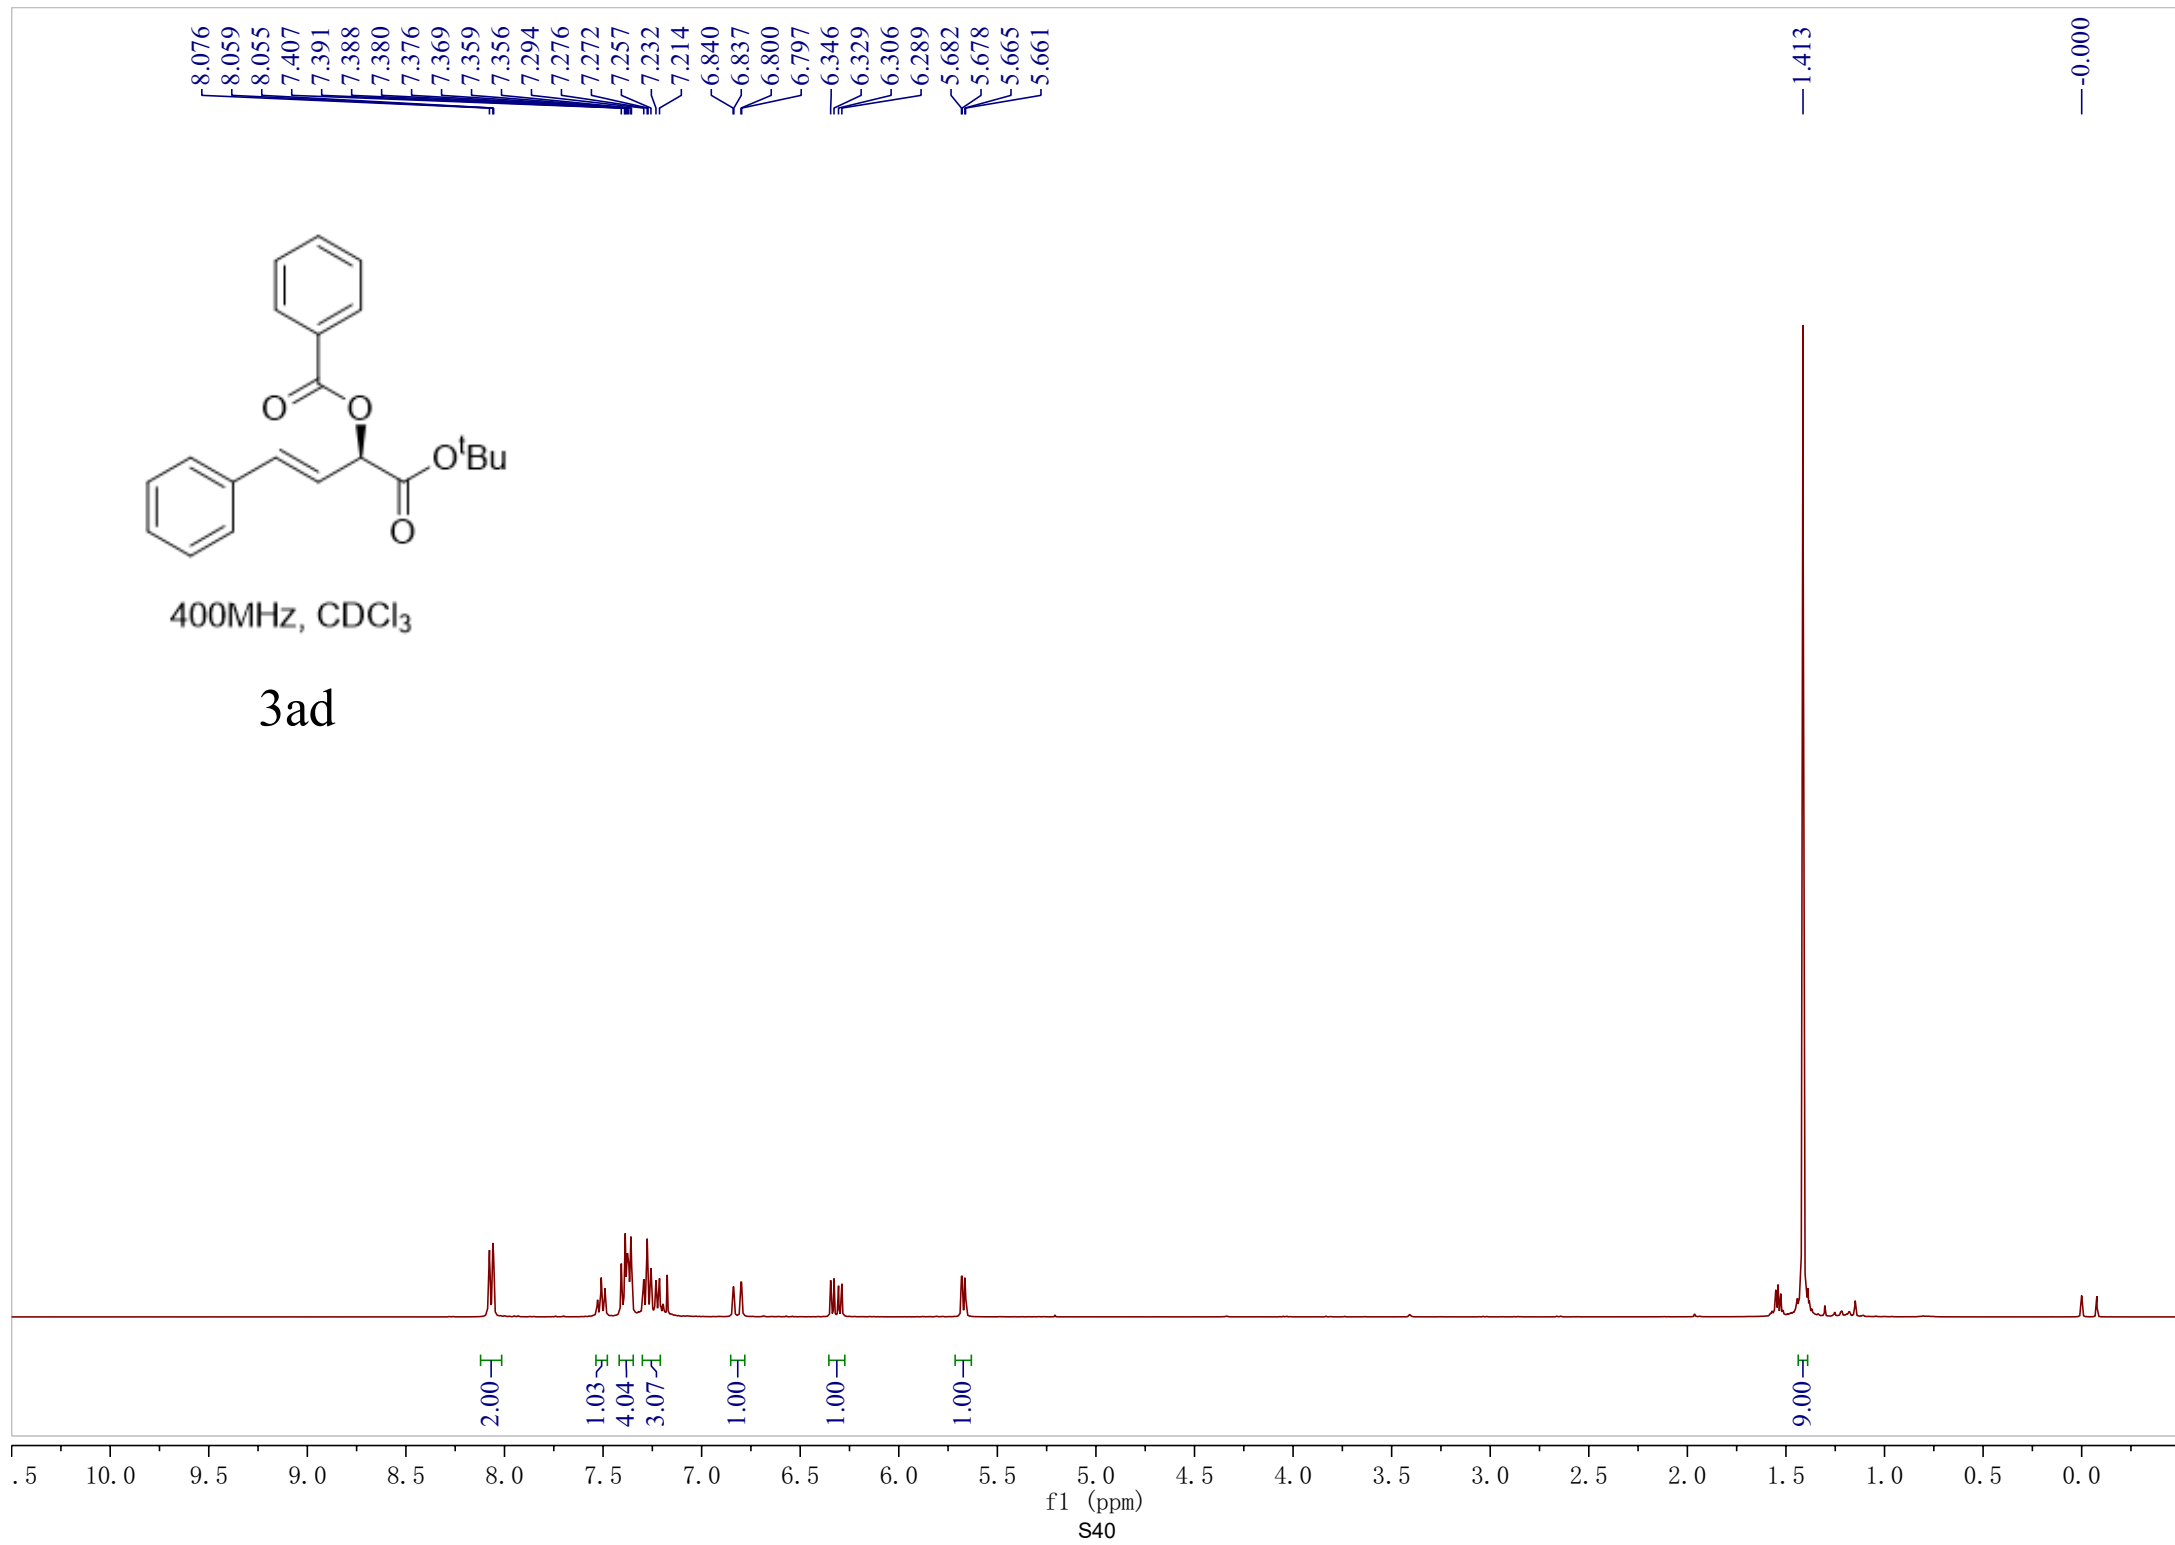

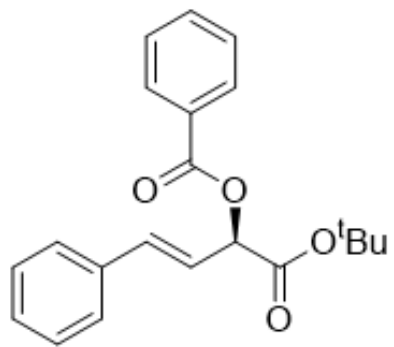

100MHz, CDCl<sub>3</sub>

3ad

~167.687  
~165.752

135.902  
134.753  
133.363  
129.932  
129.584  
128.707  
128.465  
126.851  
121.575

—82.780

—74.029

—28.015

10 200 190 180 170 160 150 140 130 120 110 100 90 80 70 60 50 40 30 20 10 0 -1  
f1 (ppm)  
S41

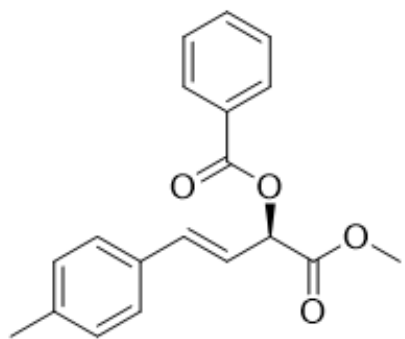

400MHz, CDCl<sub>3</sub>

3ae

8.150  
8.147  
8.143  
8.134  
8.129  
8.125  
7.602  
7.583  
7.578  
7.568  
7.564  
7.561  
7.479  
7.475  
7.462  
7.459  
7.455  
7.444  
7.440  
7.439  
7.344  
7.340  
7.328  
7.323  
7.157  
7.152  
7.137  
6.894  
6.891  
6.855  
6.851  
6.374  
6.356  
6.334  
6.316  
5.861  
5.858  
5.843  
5.840  
3.795

2.339

-0.000

10.0 9.5 9.0 8.5 8.0 7.5 7.0 6.5 6.0 5.5 5.0 4.5 4.0 3.5 3.0 2.5 2.0 1.5 1.0 0.5 0.0 -0

f1 (ppm)  
S42

1.98

1.00

2.00

2.00

2.00

1.00

1.00

1.00

3.00

3.00

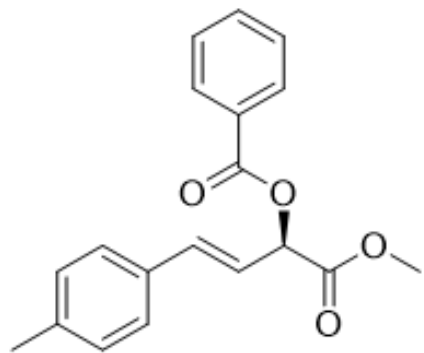

100MHz, CDCl<sub>3</sub>

3ae

—169.319  
—165.773

—138.679  
—135.564  
—133.520  
—132.803  
—130.010  
—129.447  
—129.333  
—128.515  
—126.851  
—119.806

—73.801

—52.747

—21.326

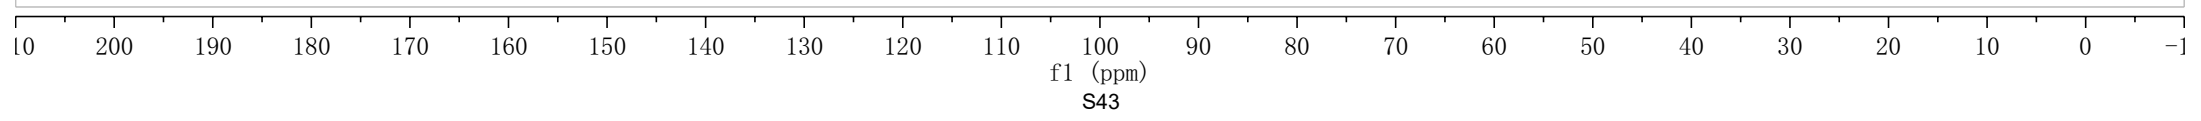

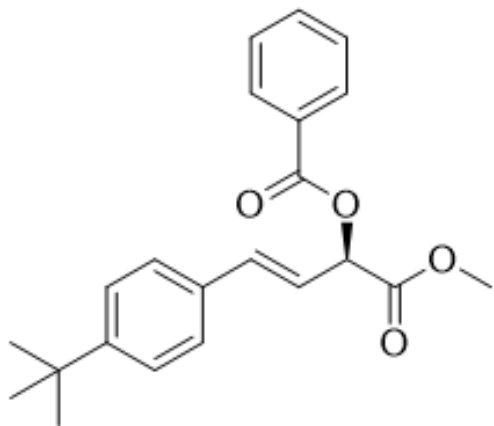

400MHz, CDCl<sub>3</sub>

3af

8.070  
8.067  
8.050  
8.046  
7.532  
7.514  
7.499  
7.495  
7.492  
7.409  
7.389  
7.375  
7.370  
7.302  
6.834  
6.794  
6.311  
6.293  
6.271  
6.253  
5.778  
5.763

3.718

1.238

0.000

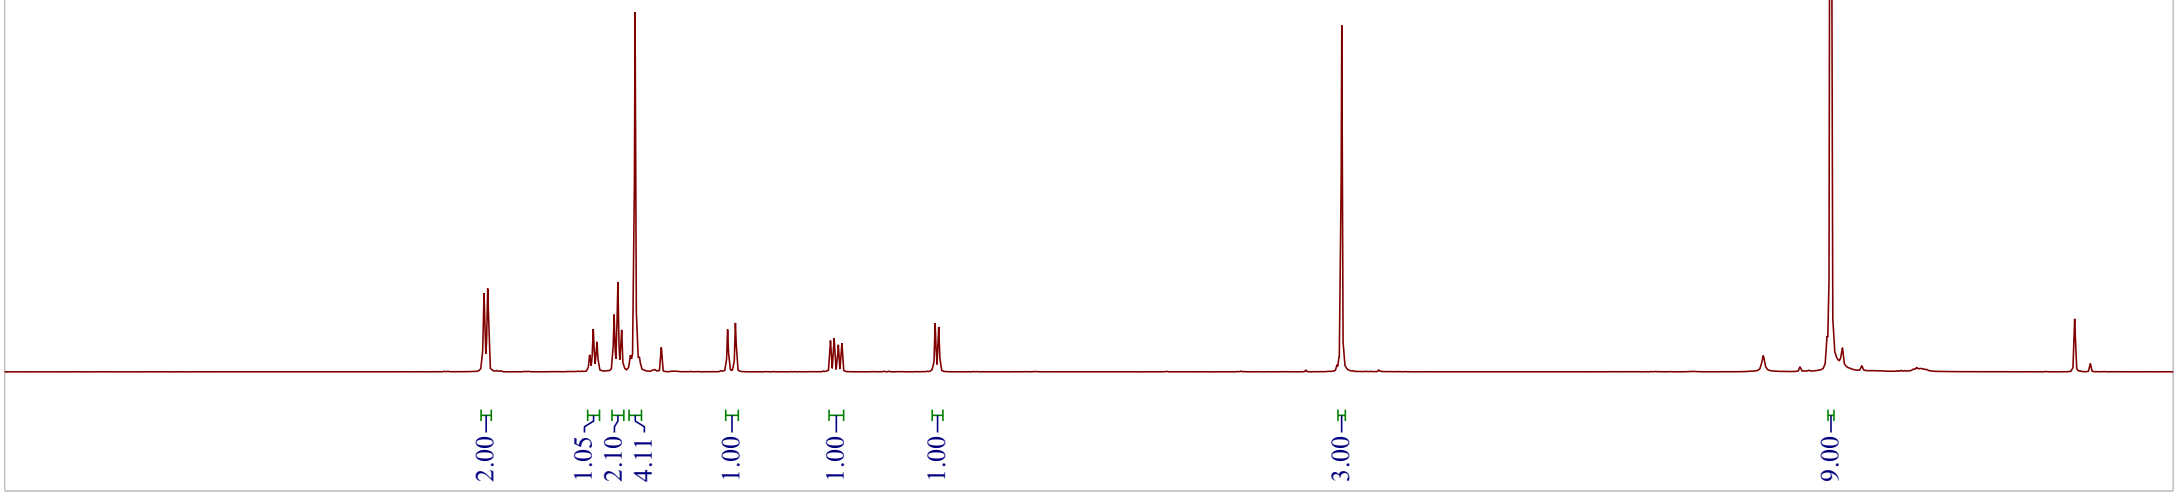

2.00

1.05

2.10

4.11

1.00

1.00

1.00

3.00

9.00

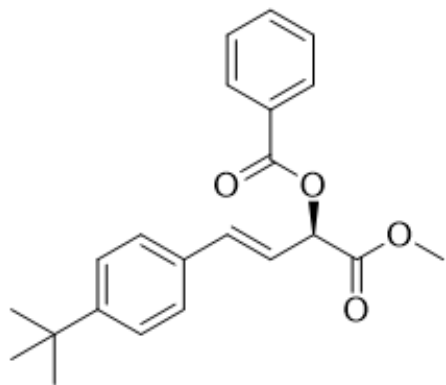

100MHz, CDCl<sub>3</sub>

3af

— 169.399  
— 165.856  
  
— 152.008  
  
— 135.550  
— 133.589  
— 132.867  
— 130.080  
— 129.389  
— 128.583  
— 126.734  
— 125.760  
— 120.128

— 73.885

— 52.822

— 34.792

— 31.349

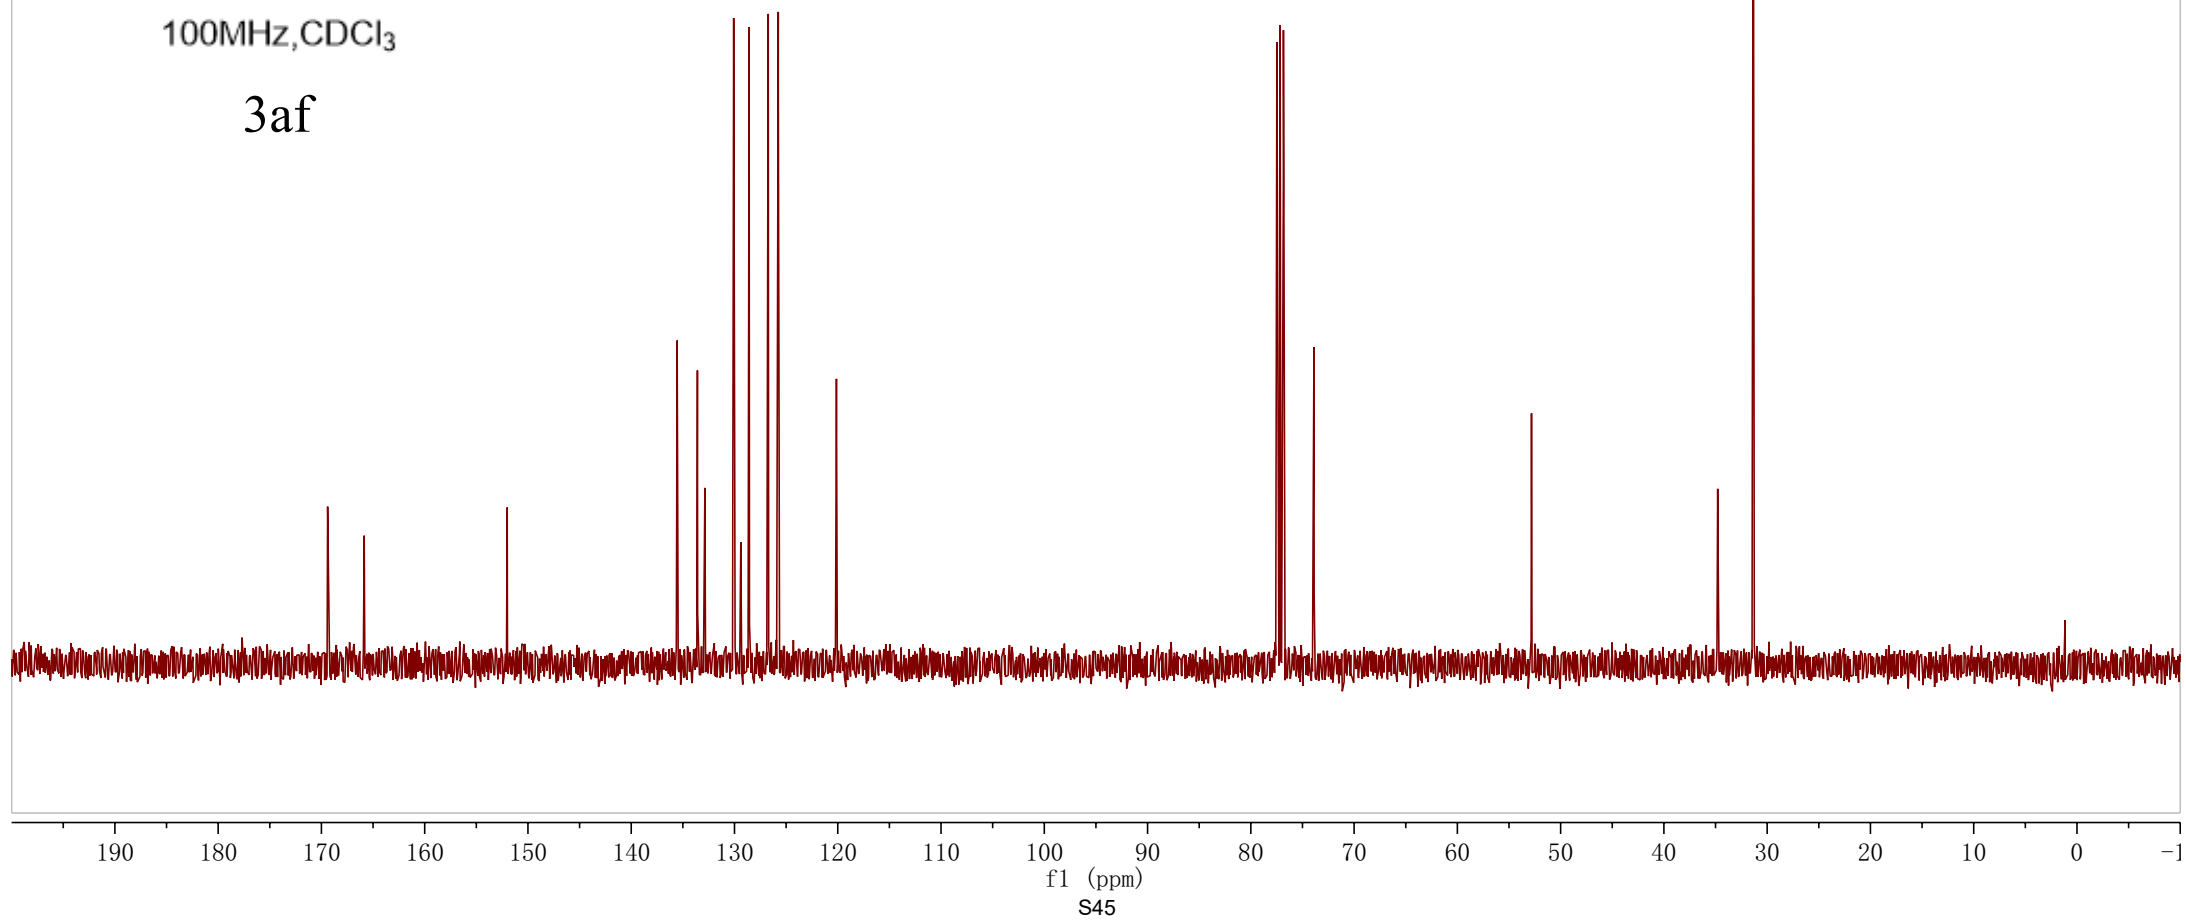

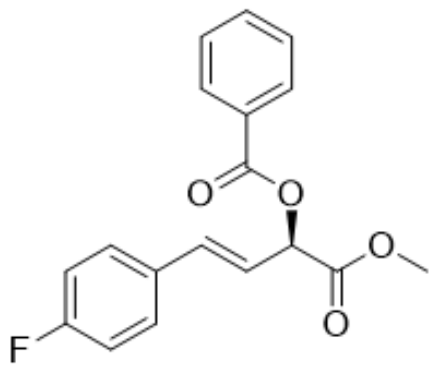

400MHz, CDCl<sub>3</sub>

3ag

8.152  
8.149  
8.146  
8.136  
8.132  
8.128  
7.620  
7.606  
7.602  
7.597  
7.586  
7.583  
7.580  
7.494  
7.490  
7.477  
7.474  
7.459  
7.455  
7.433  
7.428  
7.419  
7.411  
7.403  
7.398  
7.068  
7.061  
7.055  
7.044  
7.039  
7.033  
7.022  
7.017  
7.009  
6.892  
6.889  
6.852  
6.849  
6.353  
6.335  
6.313  
6.295  
5.875  
5.872  
5.857  
5.854  
3.812

0.000

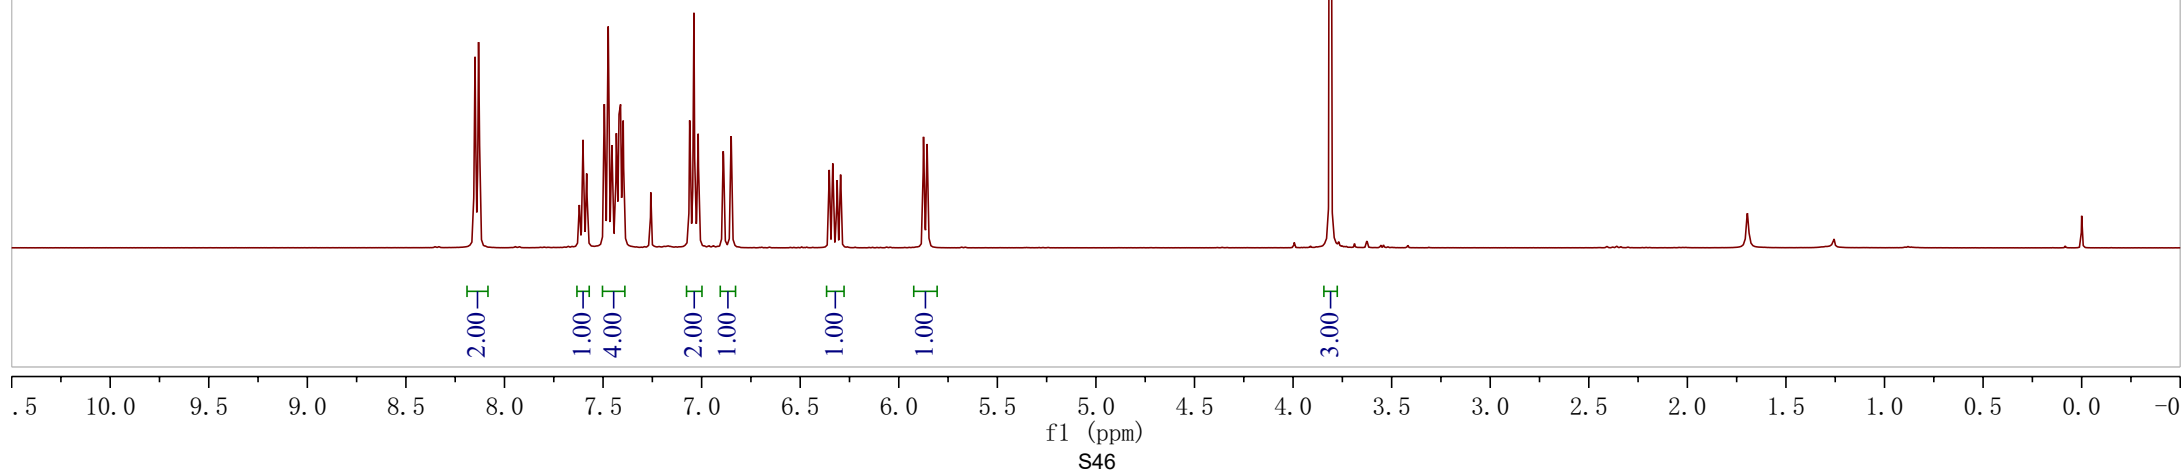



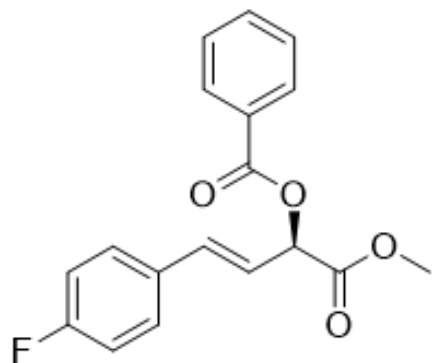

100MHz, CDCl<sub>3</sub>

3ag

169.160  
165.715  
164.145  
161.678

134.331  
133.602  
131.779  
131.745  
130.008  
129.221  
128.630  
128.549  
120.694  
120.671  
115.847  
115.631

73.527

52.837

200 190 180 170 160 150 140 130 120 110 100 90 80 70 60 50 40 30 20 10 0 -1

f1 (ppm)

S47

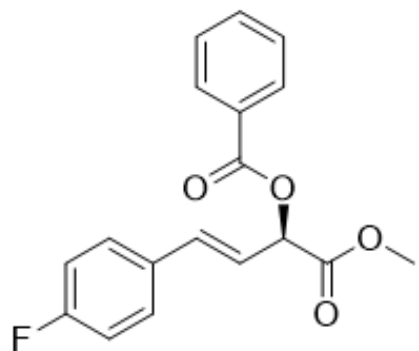

282MHz, CDCl<sub>3</sub>

3ag

-112.698

10 0 -10 -20 -30 -40 -50 -60 -70 -80 -90 -100 -110 -120 -130 -140 -150 -160 -170 -180 -190 -200 -210

f1 (ppm)

S48

8.156  
8.138  
7.652  
7.632  
7.623  
7.609  
7.605  
7.572  
7.542  
7.522  
7.511  
7.492  
7.473  
6.944  
6.905  
6.576  
6.560  
6.536  
6.520  
5.954  
5.935

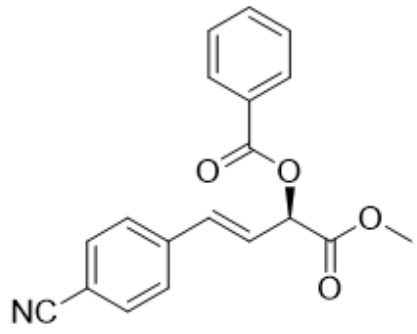

400MHz, CDCl<sub>3</sub>

3ah

3.828

-0.000

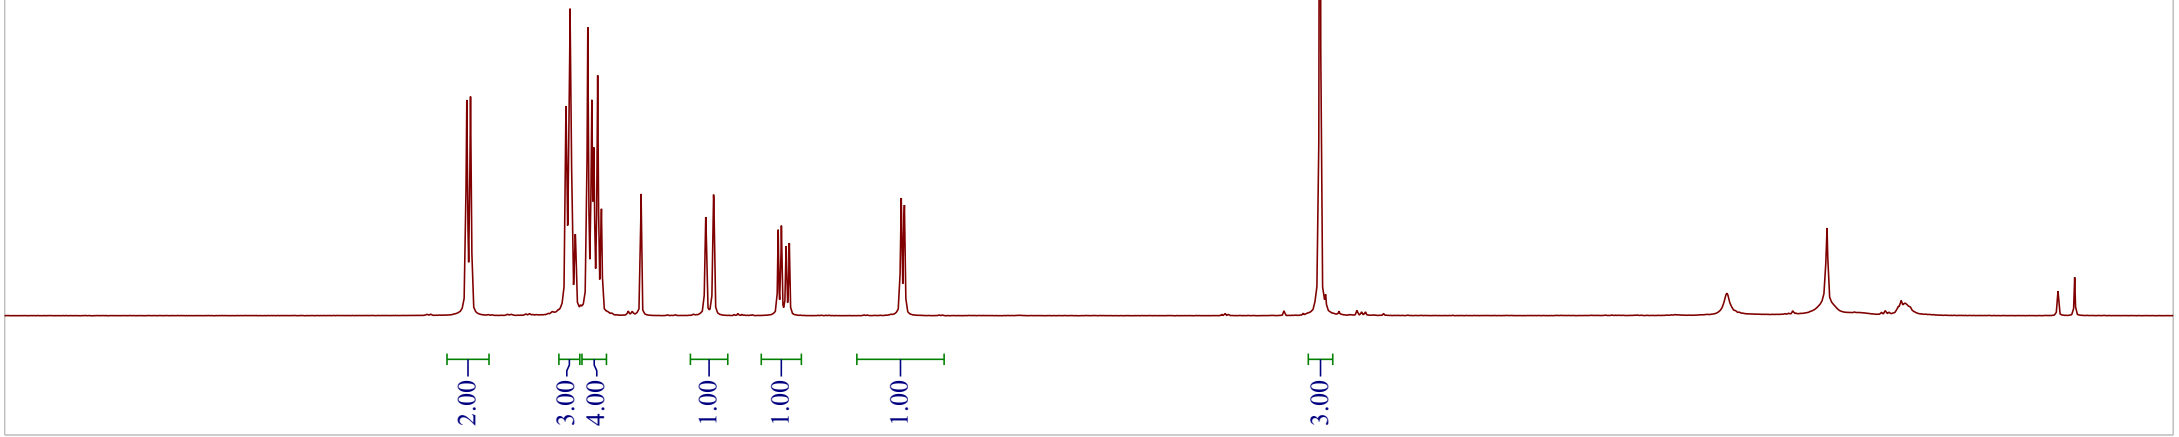

10.5 10.0 9.5 9.0 8.5 8.0 7.5 7.0 6.5 6.0 5.5 5.0 4.5 4.0 3.5 3.0 2.5 2.0 1.5 1.0 0.5 0.0 -0.5  
f1 (ppm)  
S49

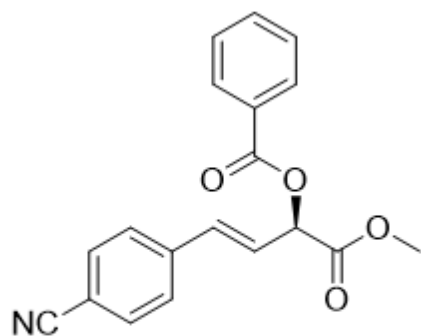

100MHz, CDCl<sub>3</sub>

3ah

—168.613  
—165.524

—139.997  
—133.761  
—133.034  
—132.563  
—130.011  
—129.001  
—128.616  
—127.413  
—124.973  
—118.733

—111.837

—72.905

—53.007

200 190 180 170 160 150 140 130 120 110 100 90 80 70 60 50 40 30 20 10 0 -1

f1 (ppm)  
S50

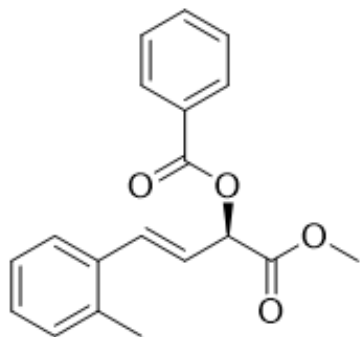

400MHz, CDCl<sub>3</sub>

3ai

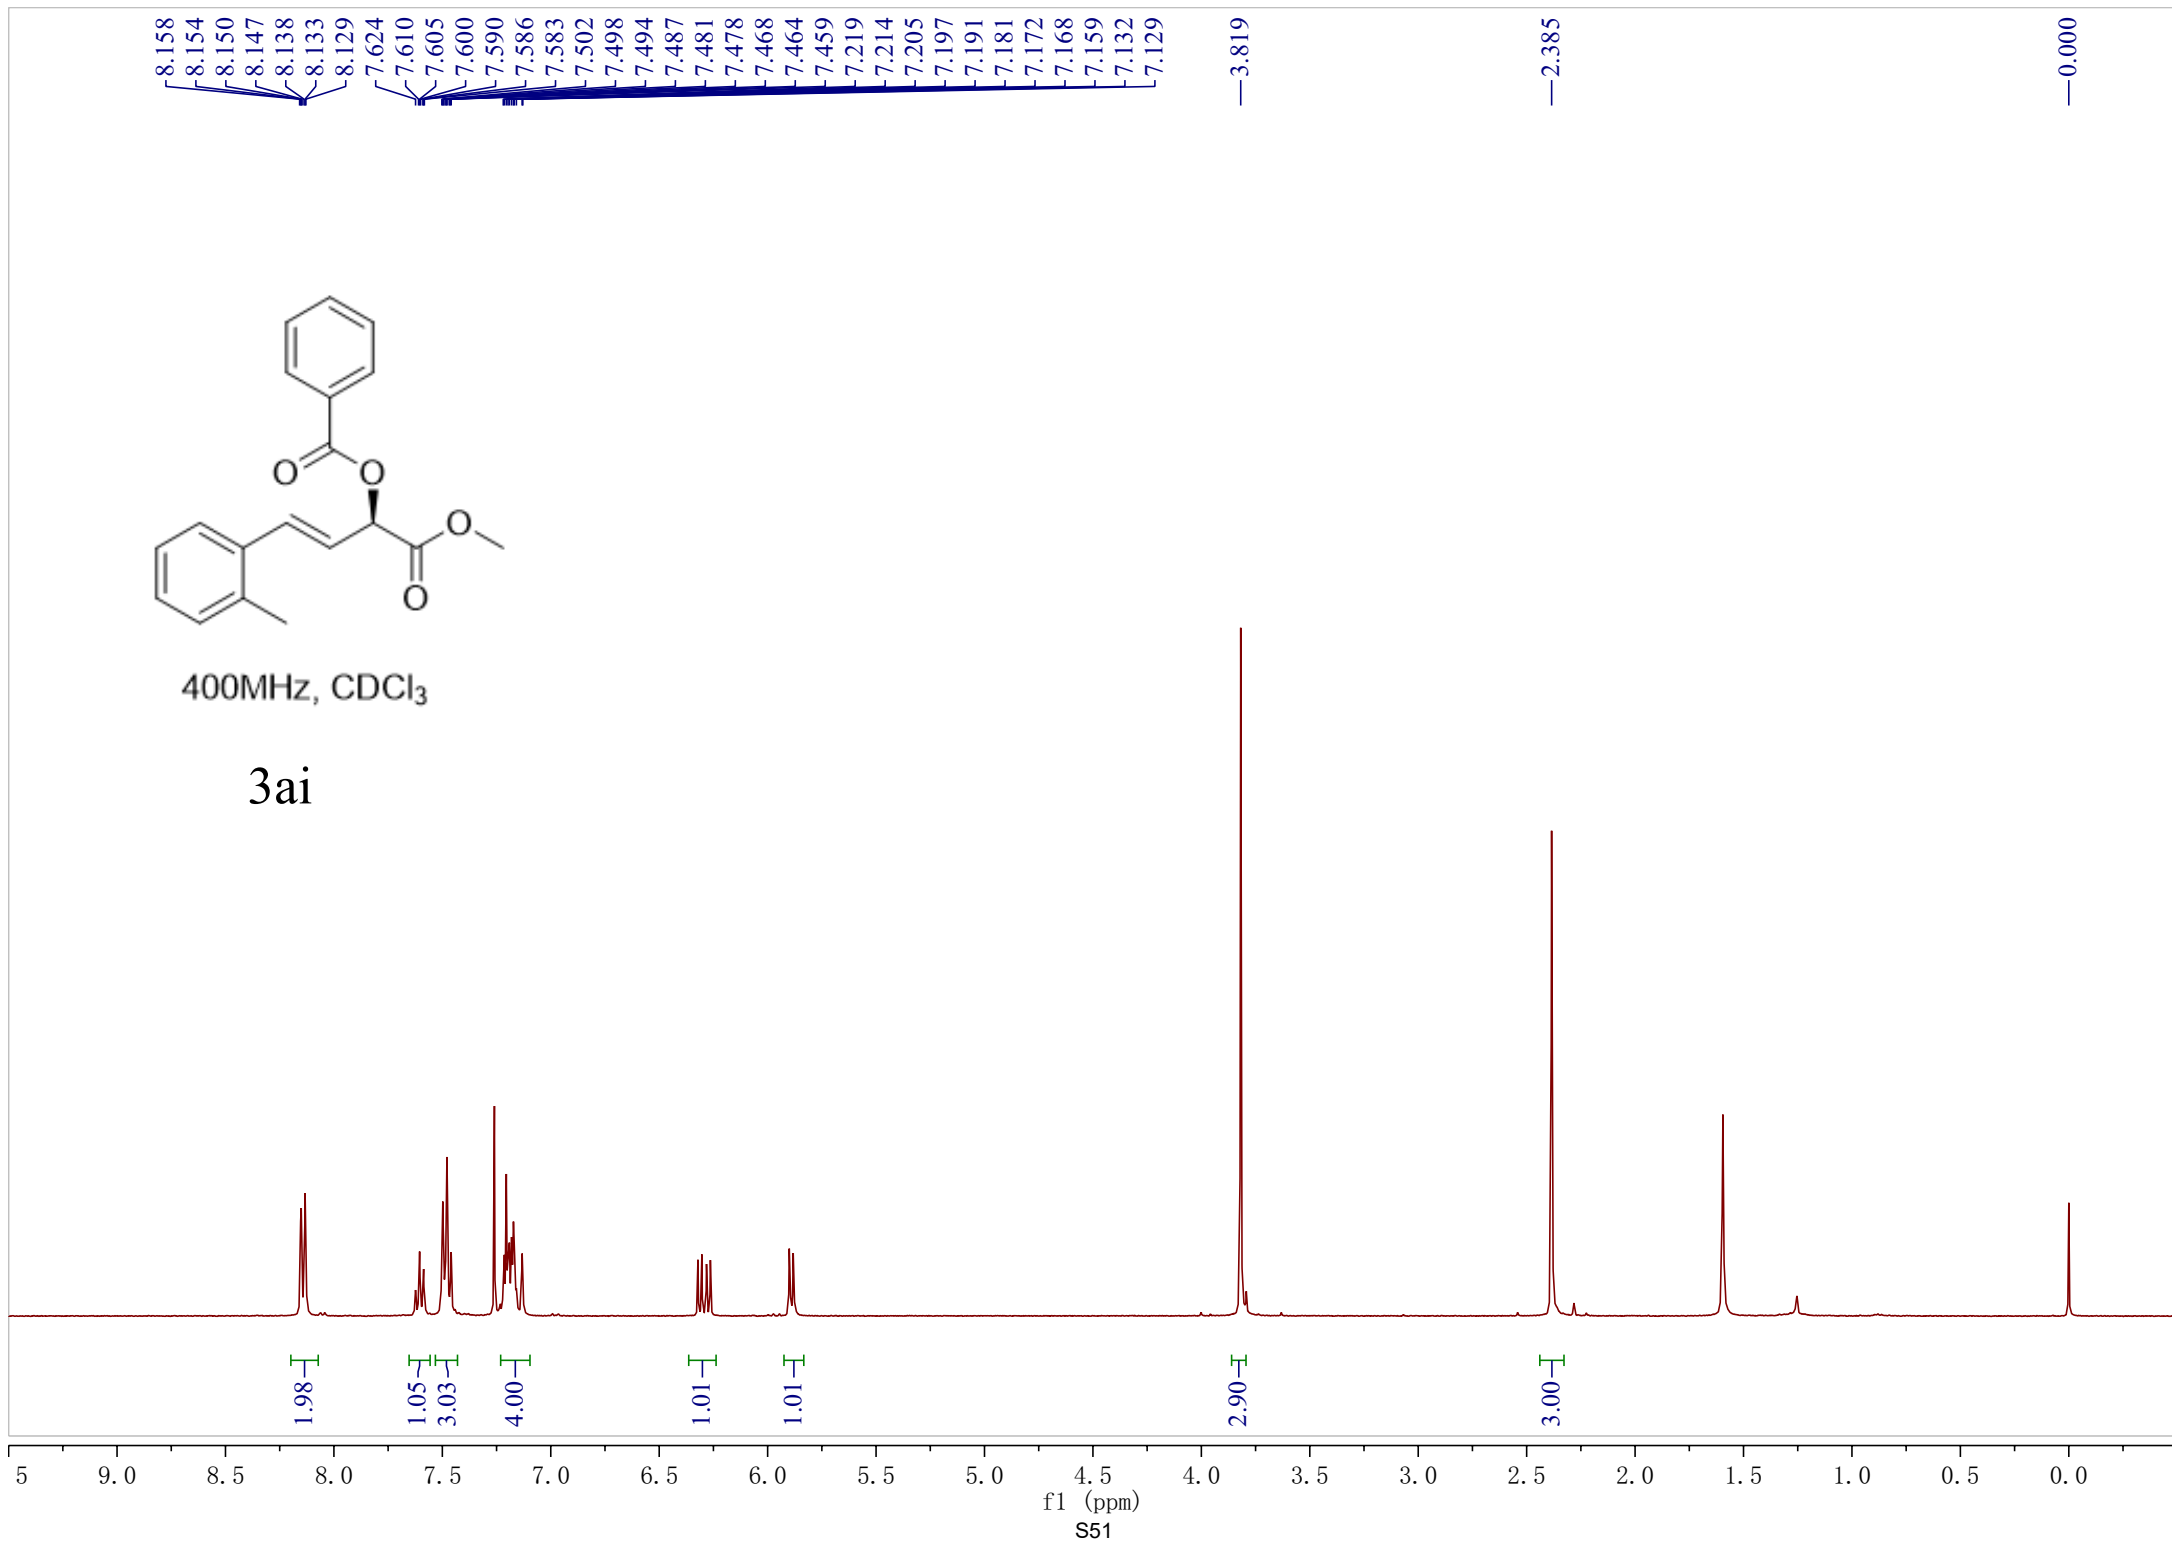

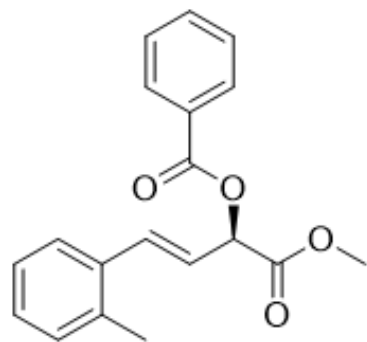

100MHz, CDCl<sub>3</sub>

3ai

—169.262  
—165.752

—136.034  
—134.662  
—133.529  
—133.486  
—130.545  
—130.497  
—129.985  
—129.308  
—128.521  
—126.254  
—125.870  
—122.116

—73.870

—52.783

—19.787

200 190 180 170 160 150 140 130 120 110 100 90 80 70 60 50 40 30 20 10 0 -1

f1 (ppm)  
S52

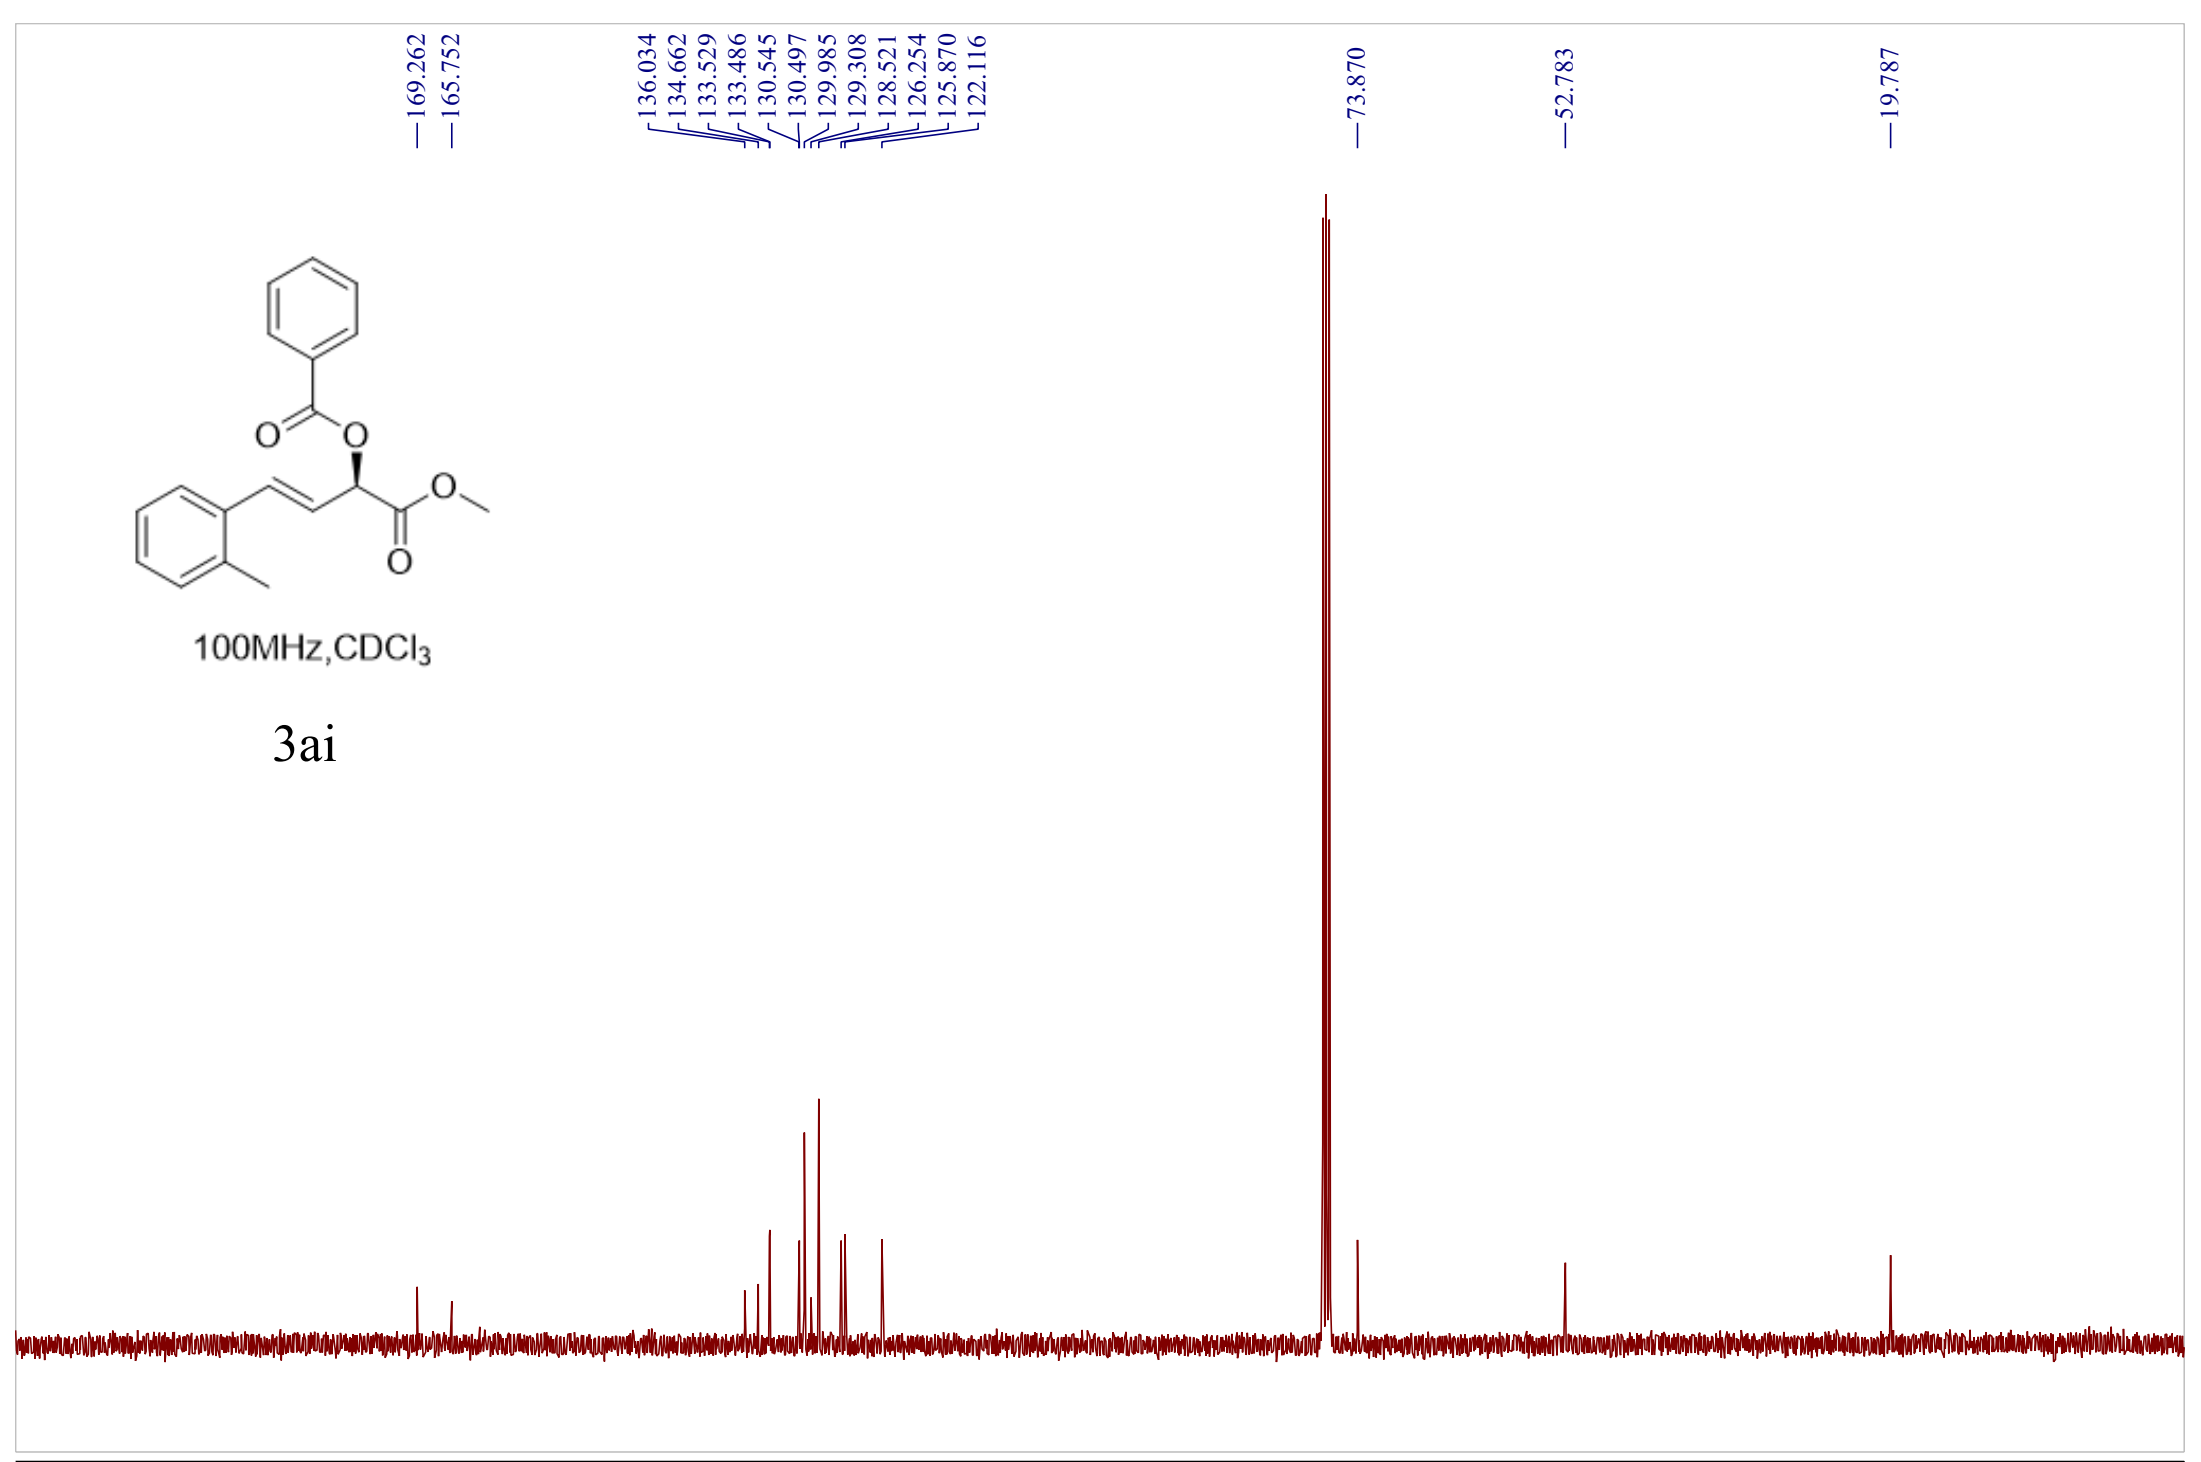

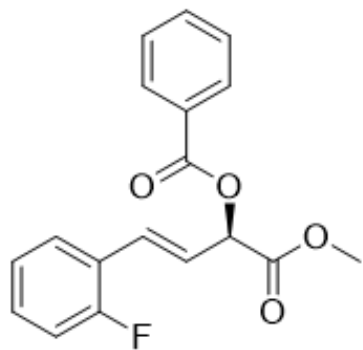

400MHz, CDCl<sub>3</sub>

3aj

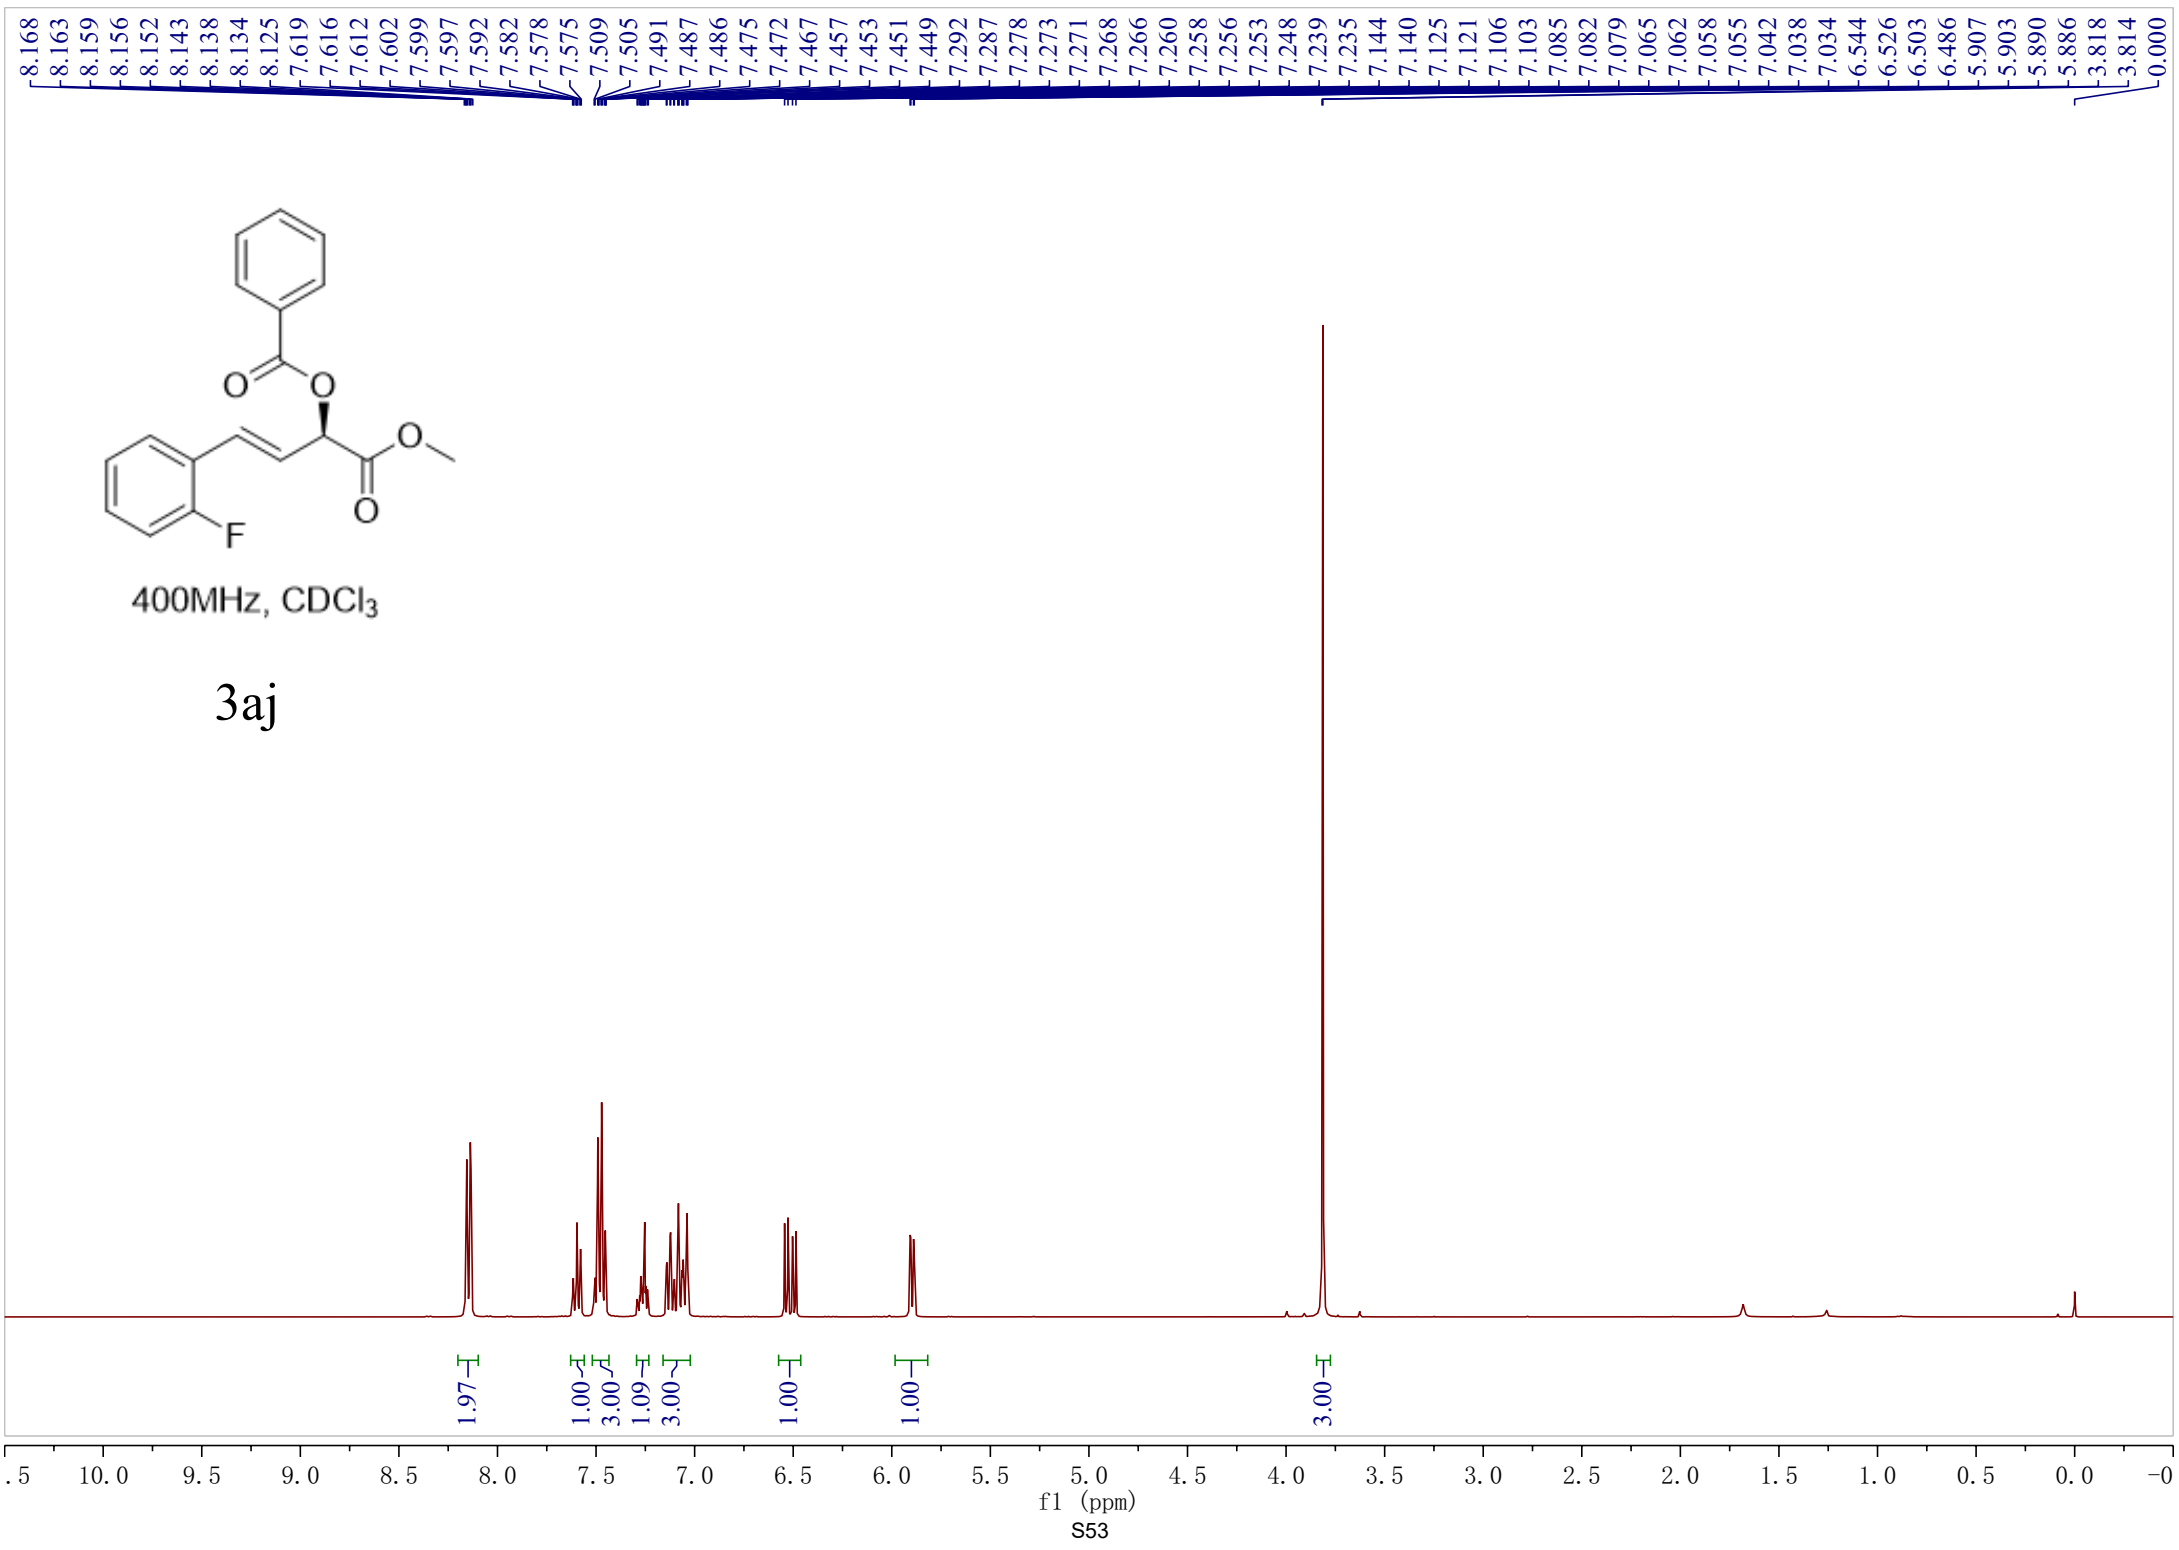

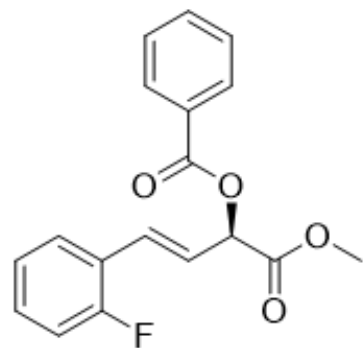

100MHz, CDCl<sub>3</sub>

3aj

169.001  
165.657  
161.776  
159.283  
133.564  
130.042  
130.013  
129.957  
129.227  
128.530  
127.977  
127.943  
124.294  
124.258  
123.577  
123.520  
123.495  
123.376  
116.061  
115.841

73.642

52.818

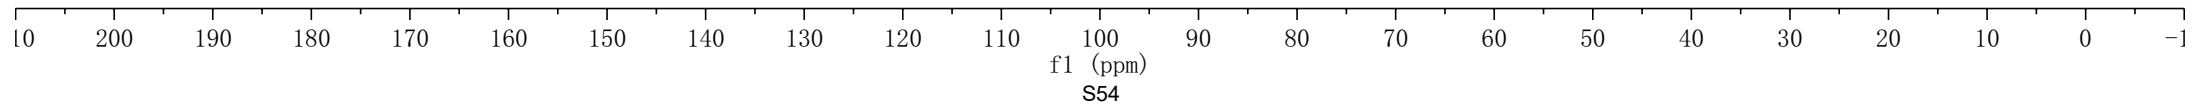



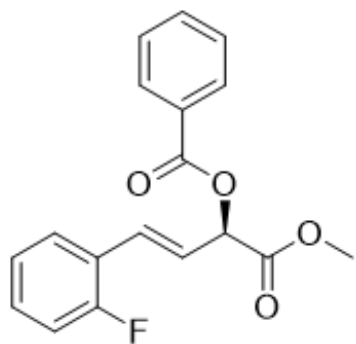

282MHz, CDCl<sub>3</sub>

3aj

---116.893

10 0 -10 -20 -30 -40 -50 -60 -70 -80 -90 -100 -110 -120 -130 -140 -150 -160 -170 -180 -190 -200 -210

f1 (ppm)

S55

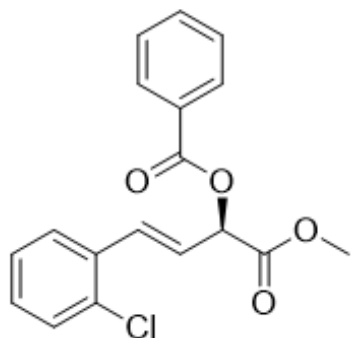

400MHz, CDCl<sub>3</sub>

3ak

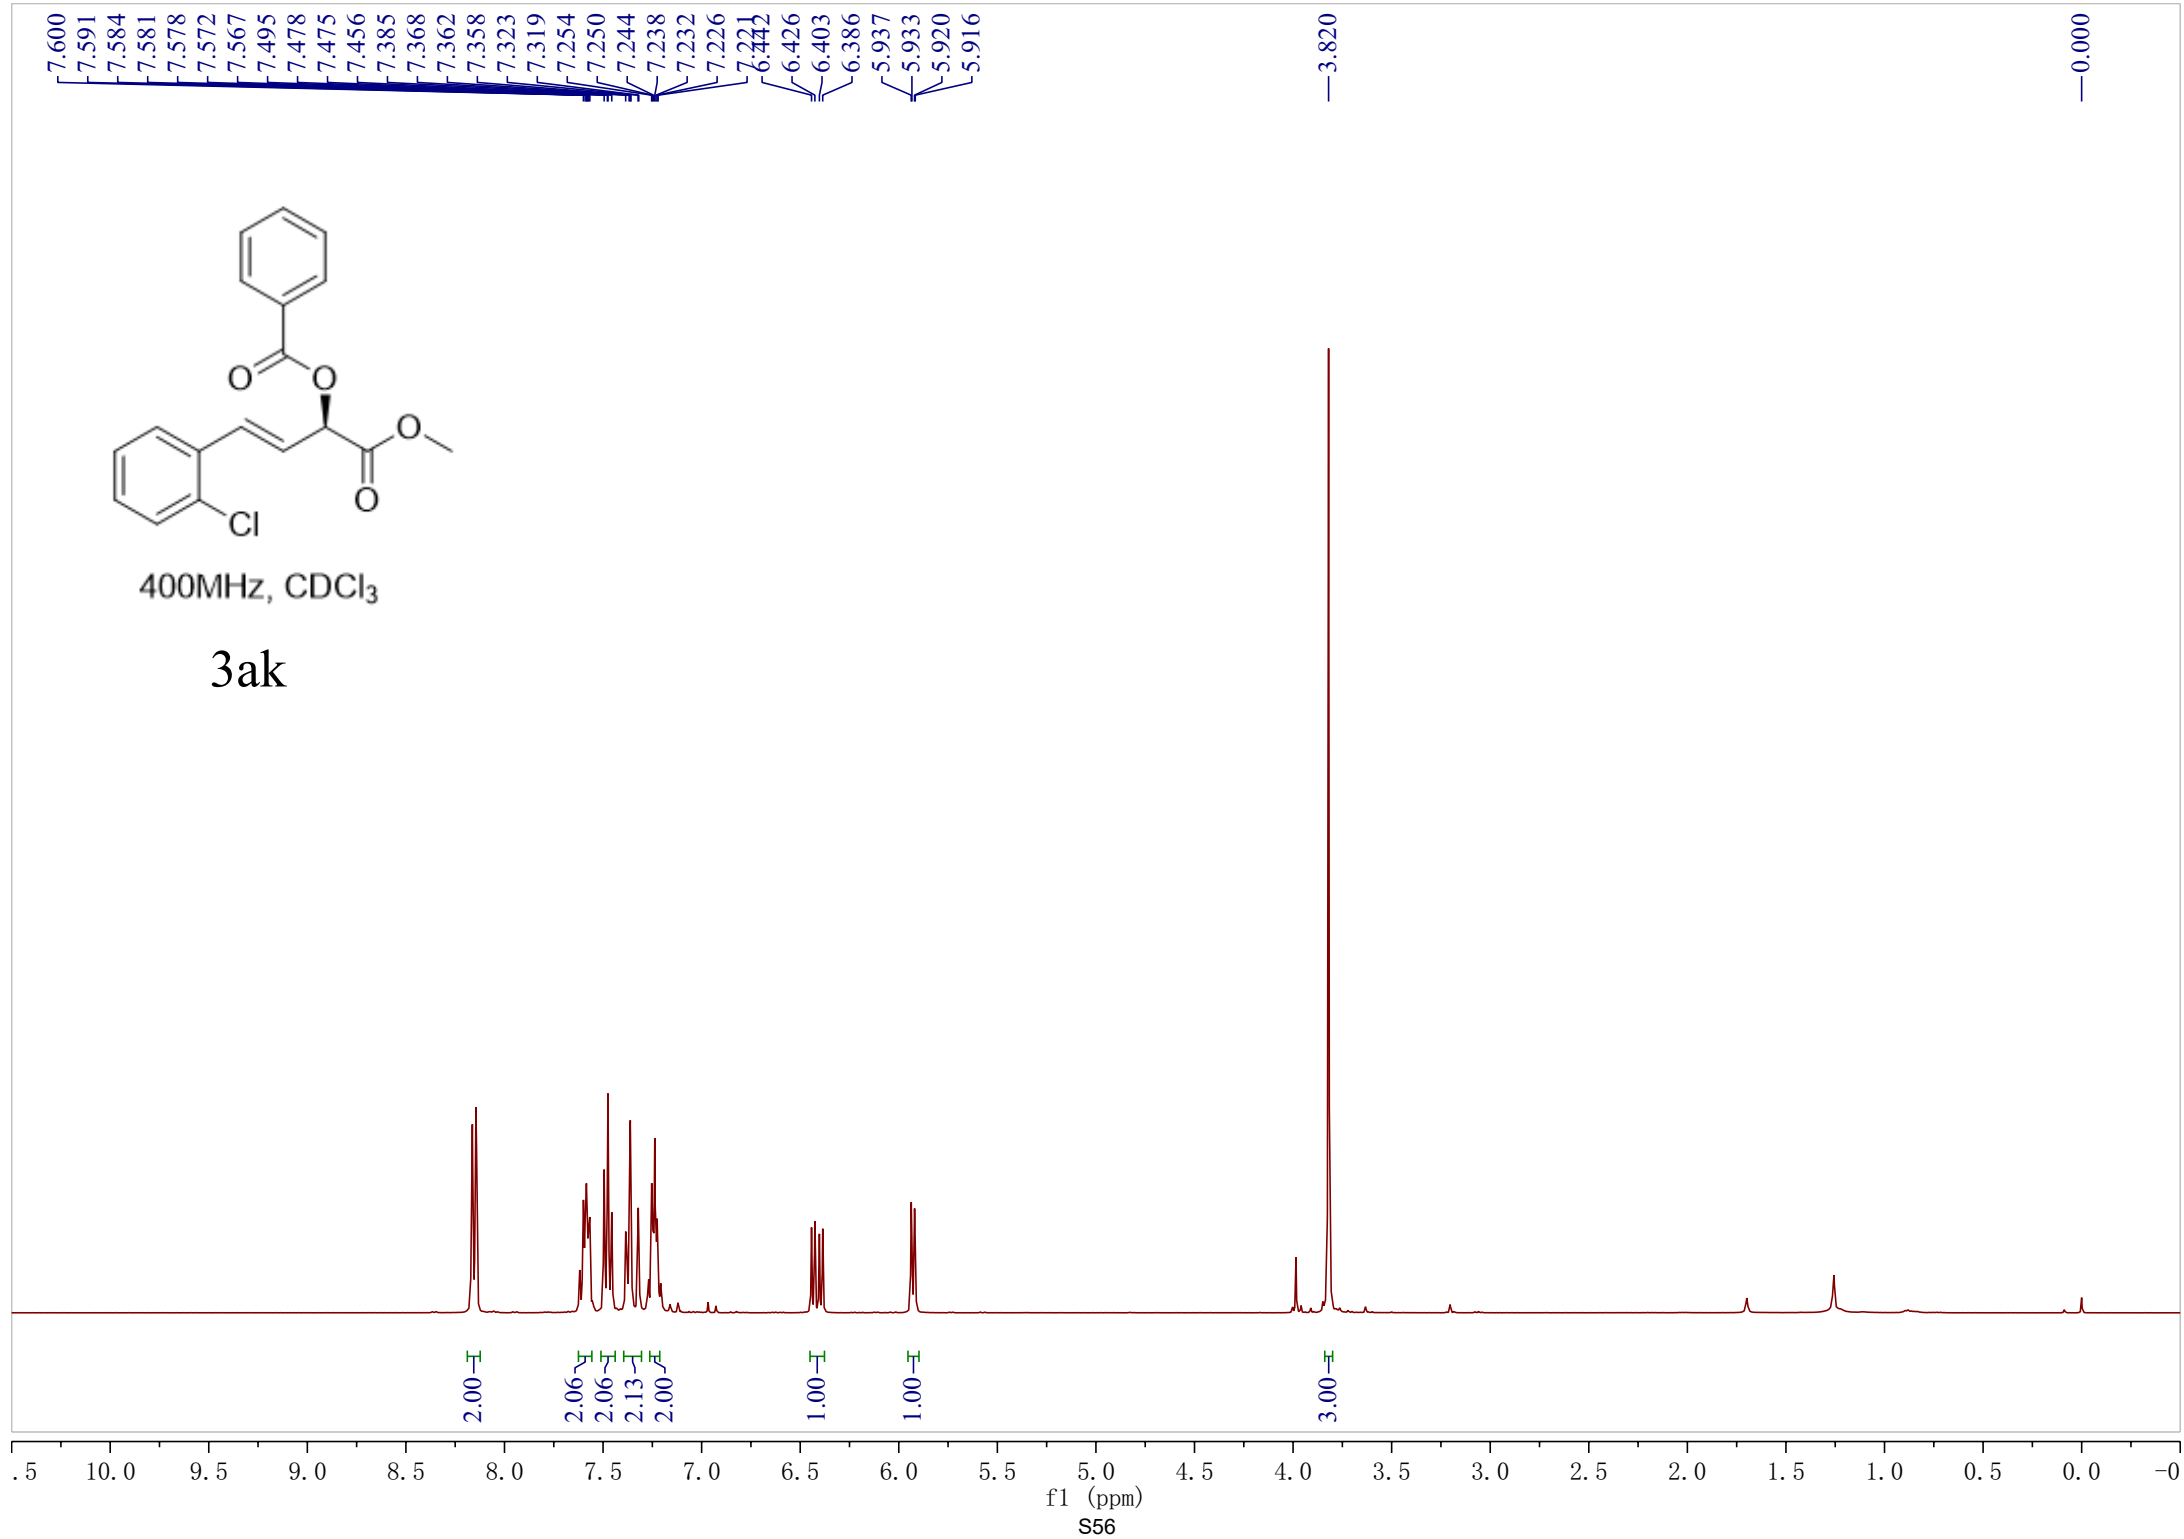

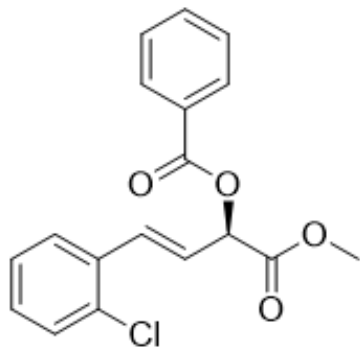

100MHz, CDCl<sub>3</sub>

3ak

— 168.961  
— 165.651

133.741  
133.621  
131.303  
130.036  
129.907  
129.637  
129.192  
128.573  
127.077  
127.033  
123.623

— 73.418

— 52.896

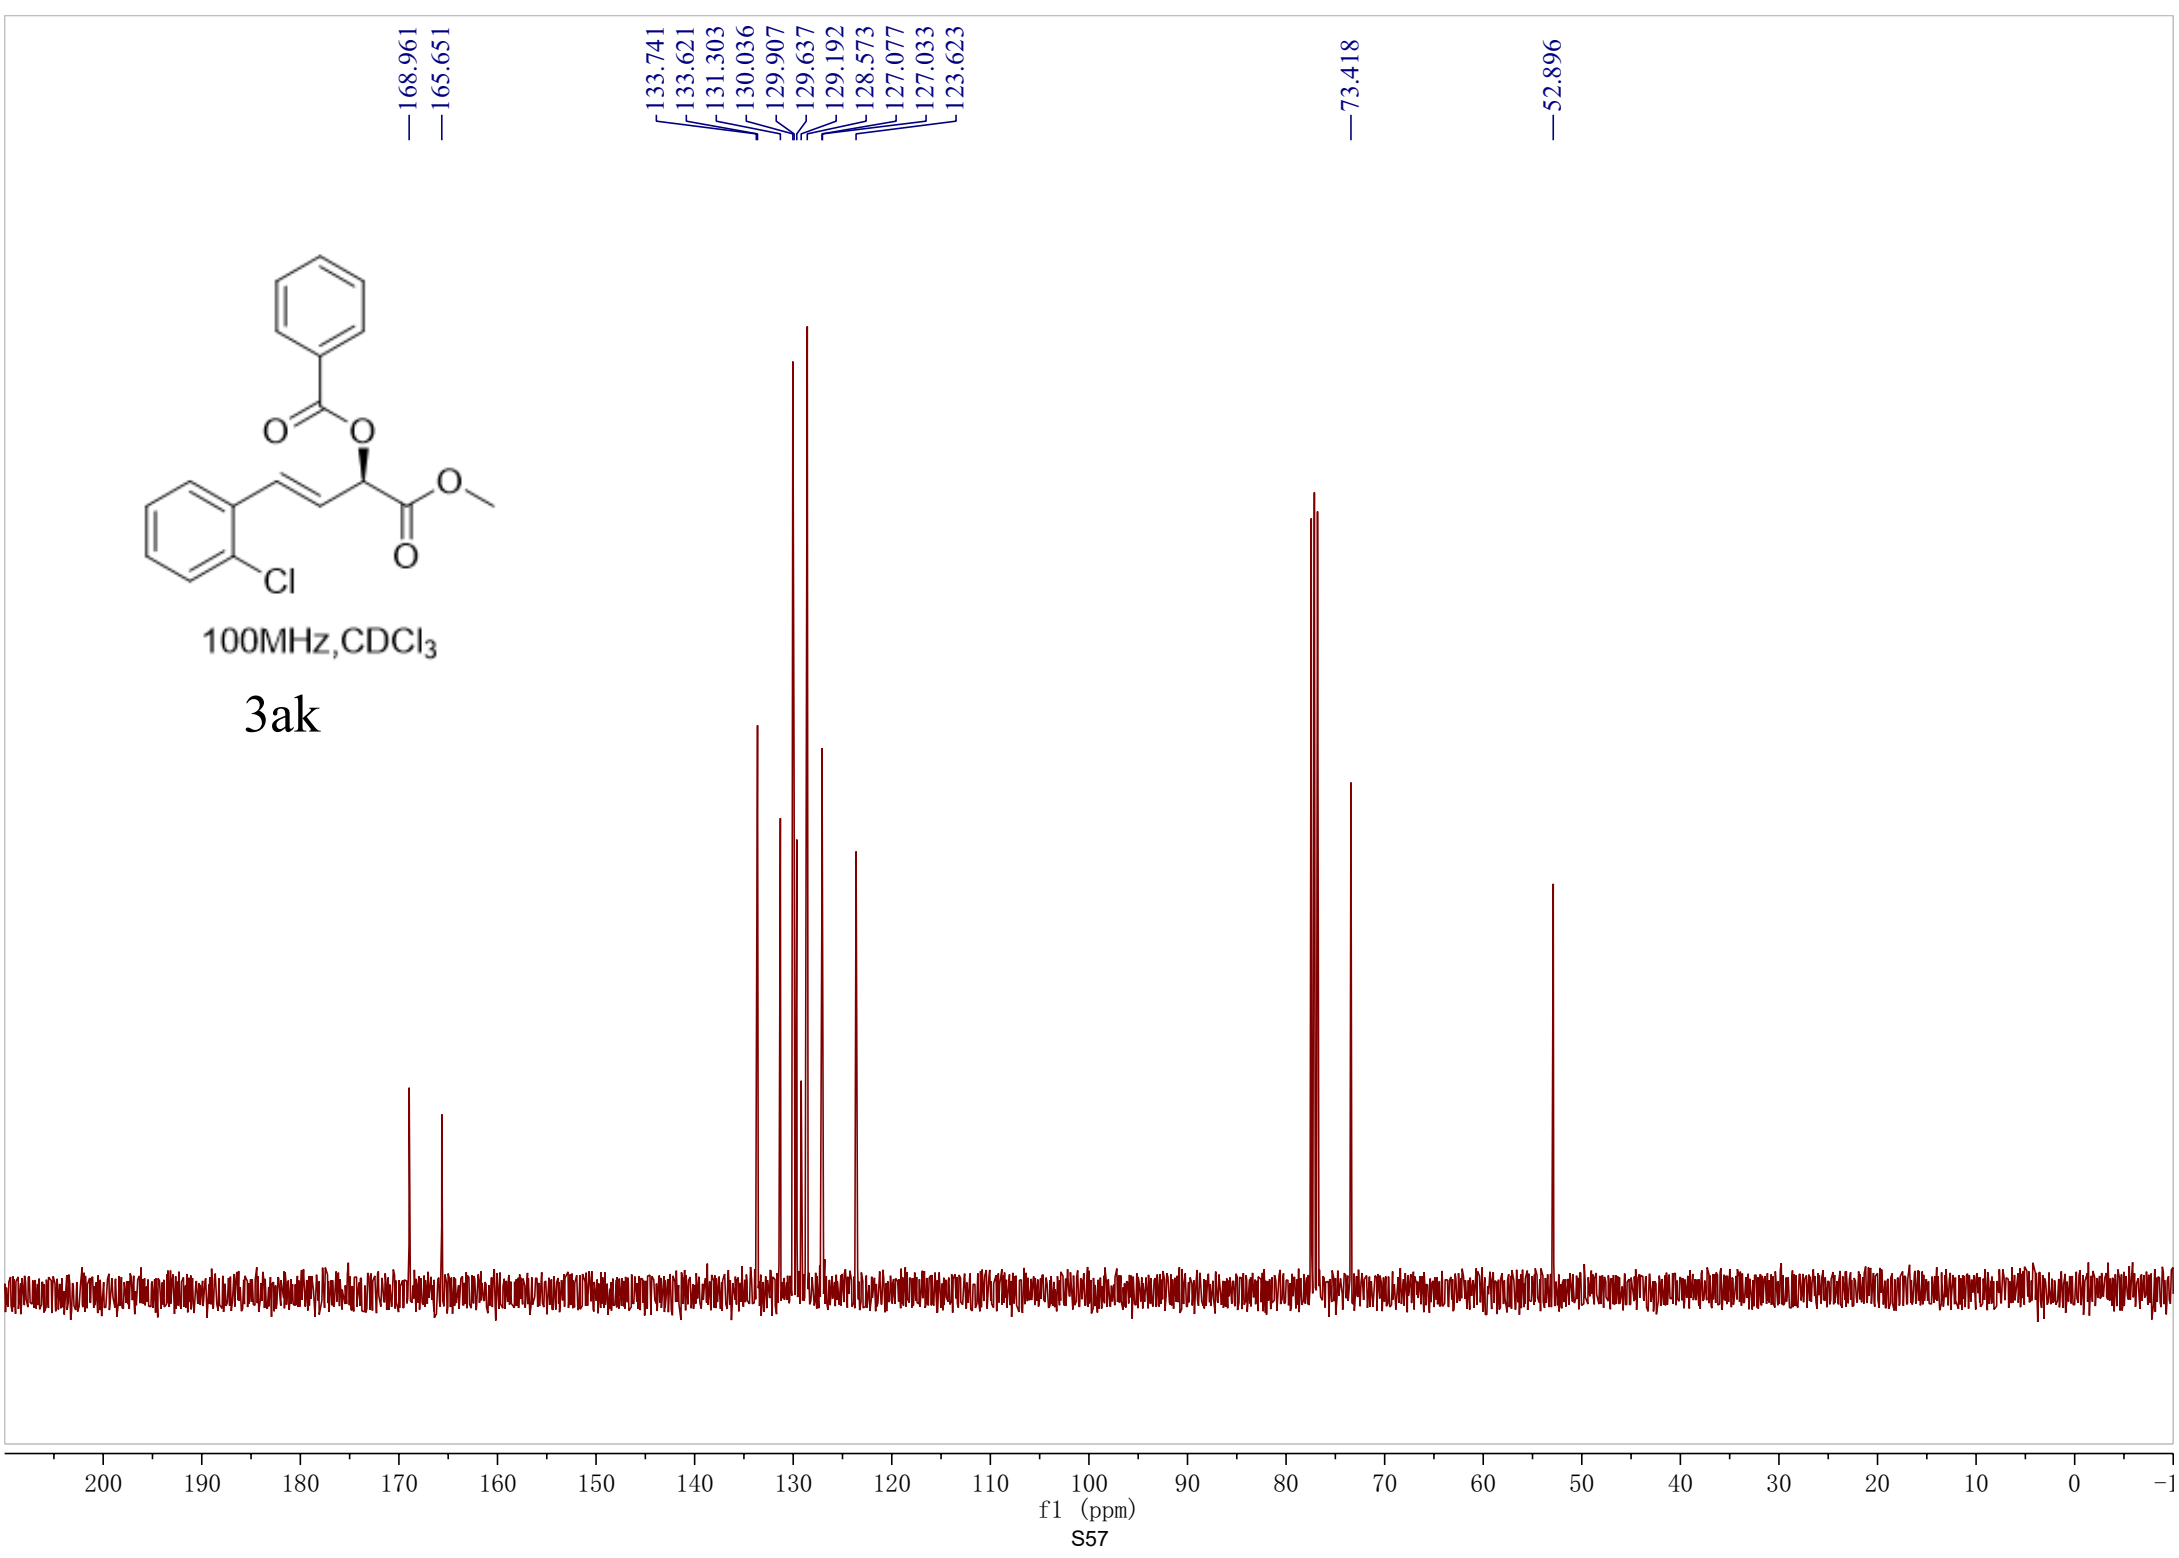

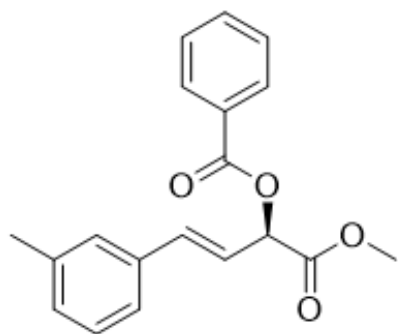

100MHz, CDCl<sub>3</sub>

3a1

169.26  
165.77

138.36  
135.67  
135.52  
133.56  
130.03  
129.49  
129.32  
128.67  
128.54  
127.60  
124.14  
120.69

73.72

52.79

21.43

200 190 180 170 160 150 140 130 120 110 100 90 80 70 60 50 40 30 20 10 0 -10

f1 (ppm)

S58

1100  
1000  
900  
800  
700  
600  
500  
400  
300  
200  
100  
0  
-100

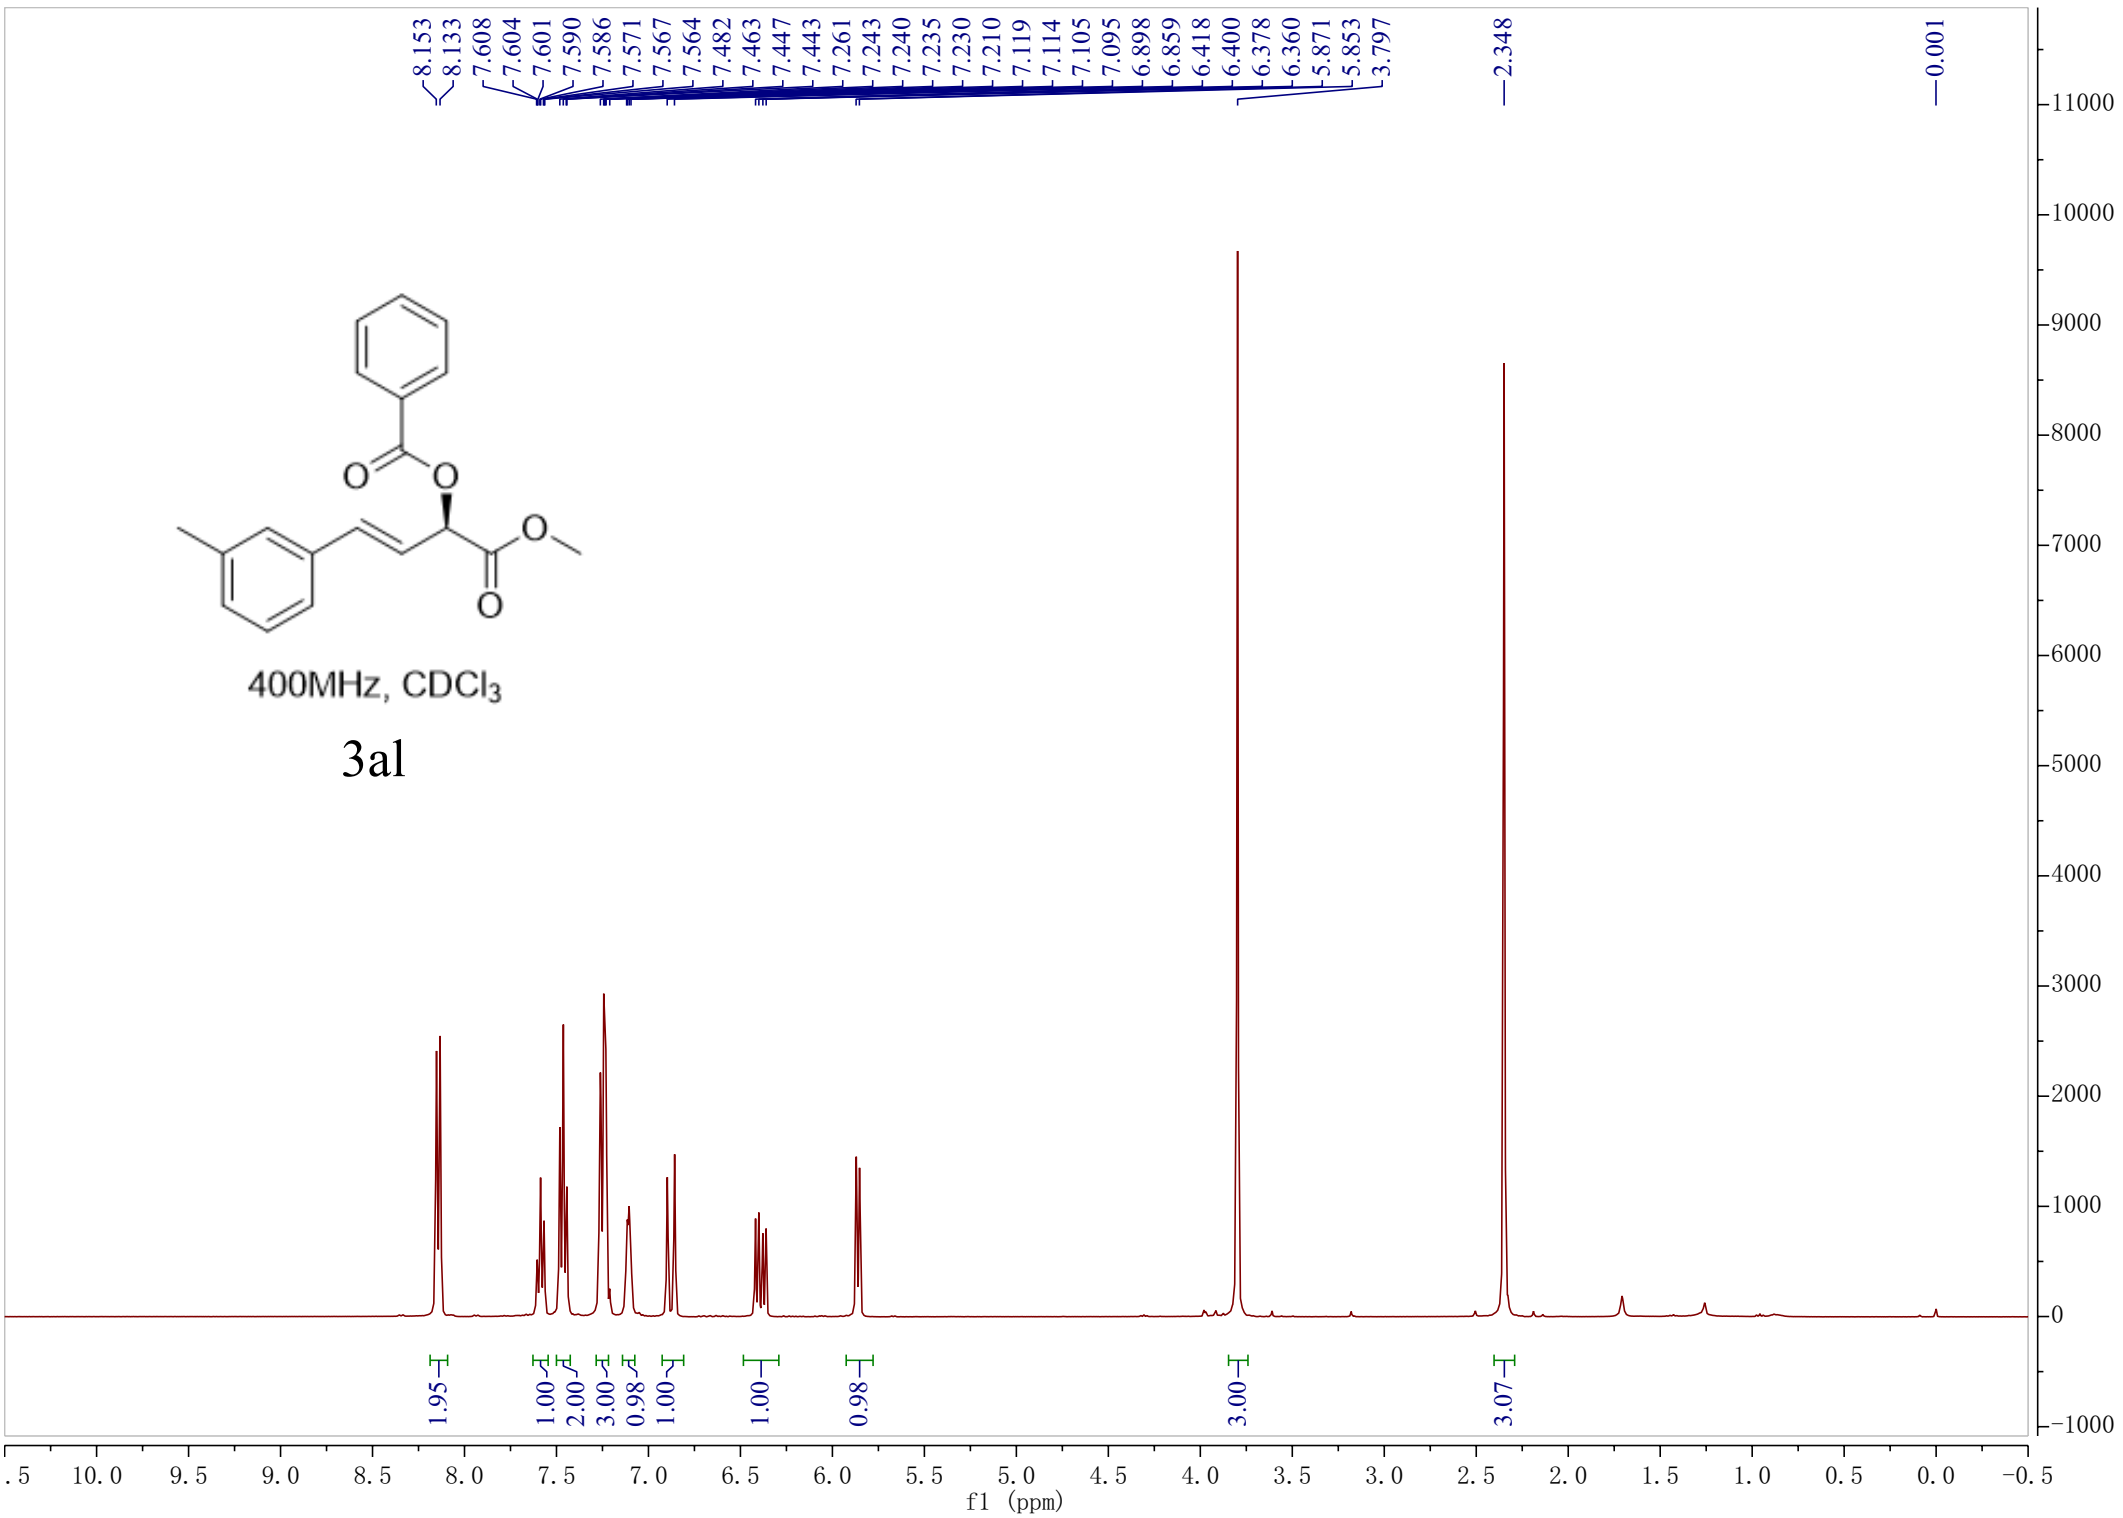

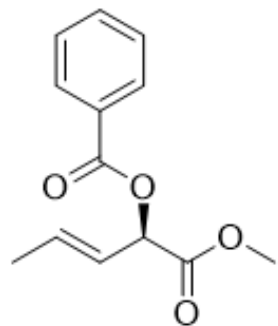

400MHz, CDCl<sub>3</sub>

3am

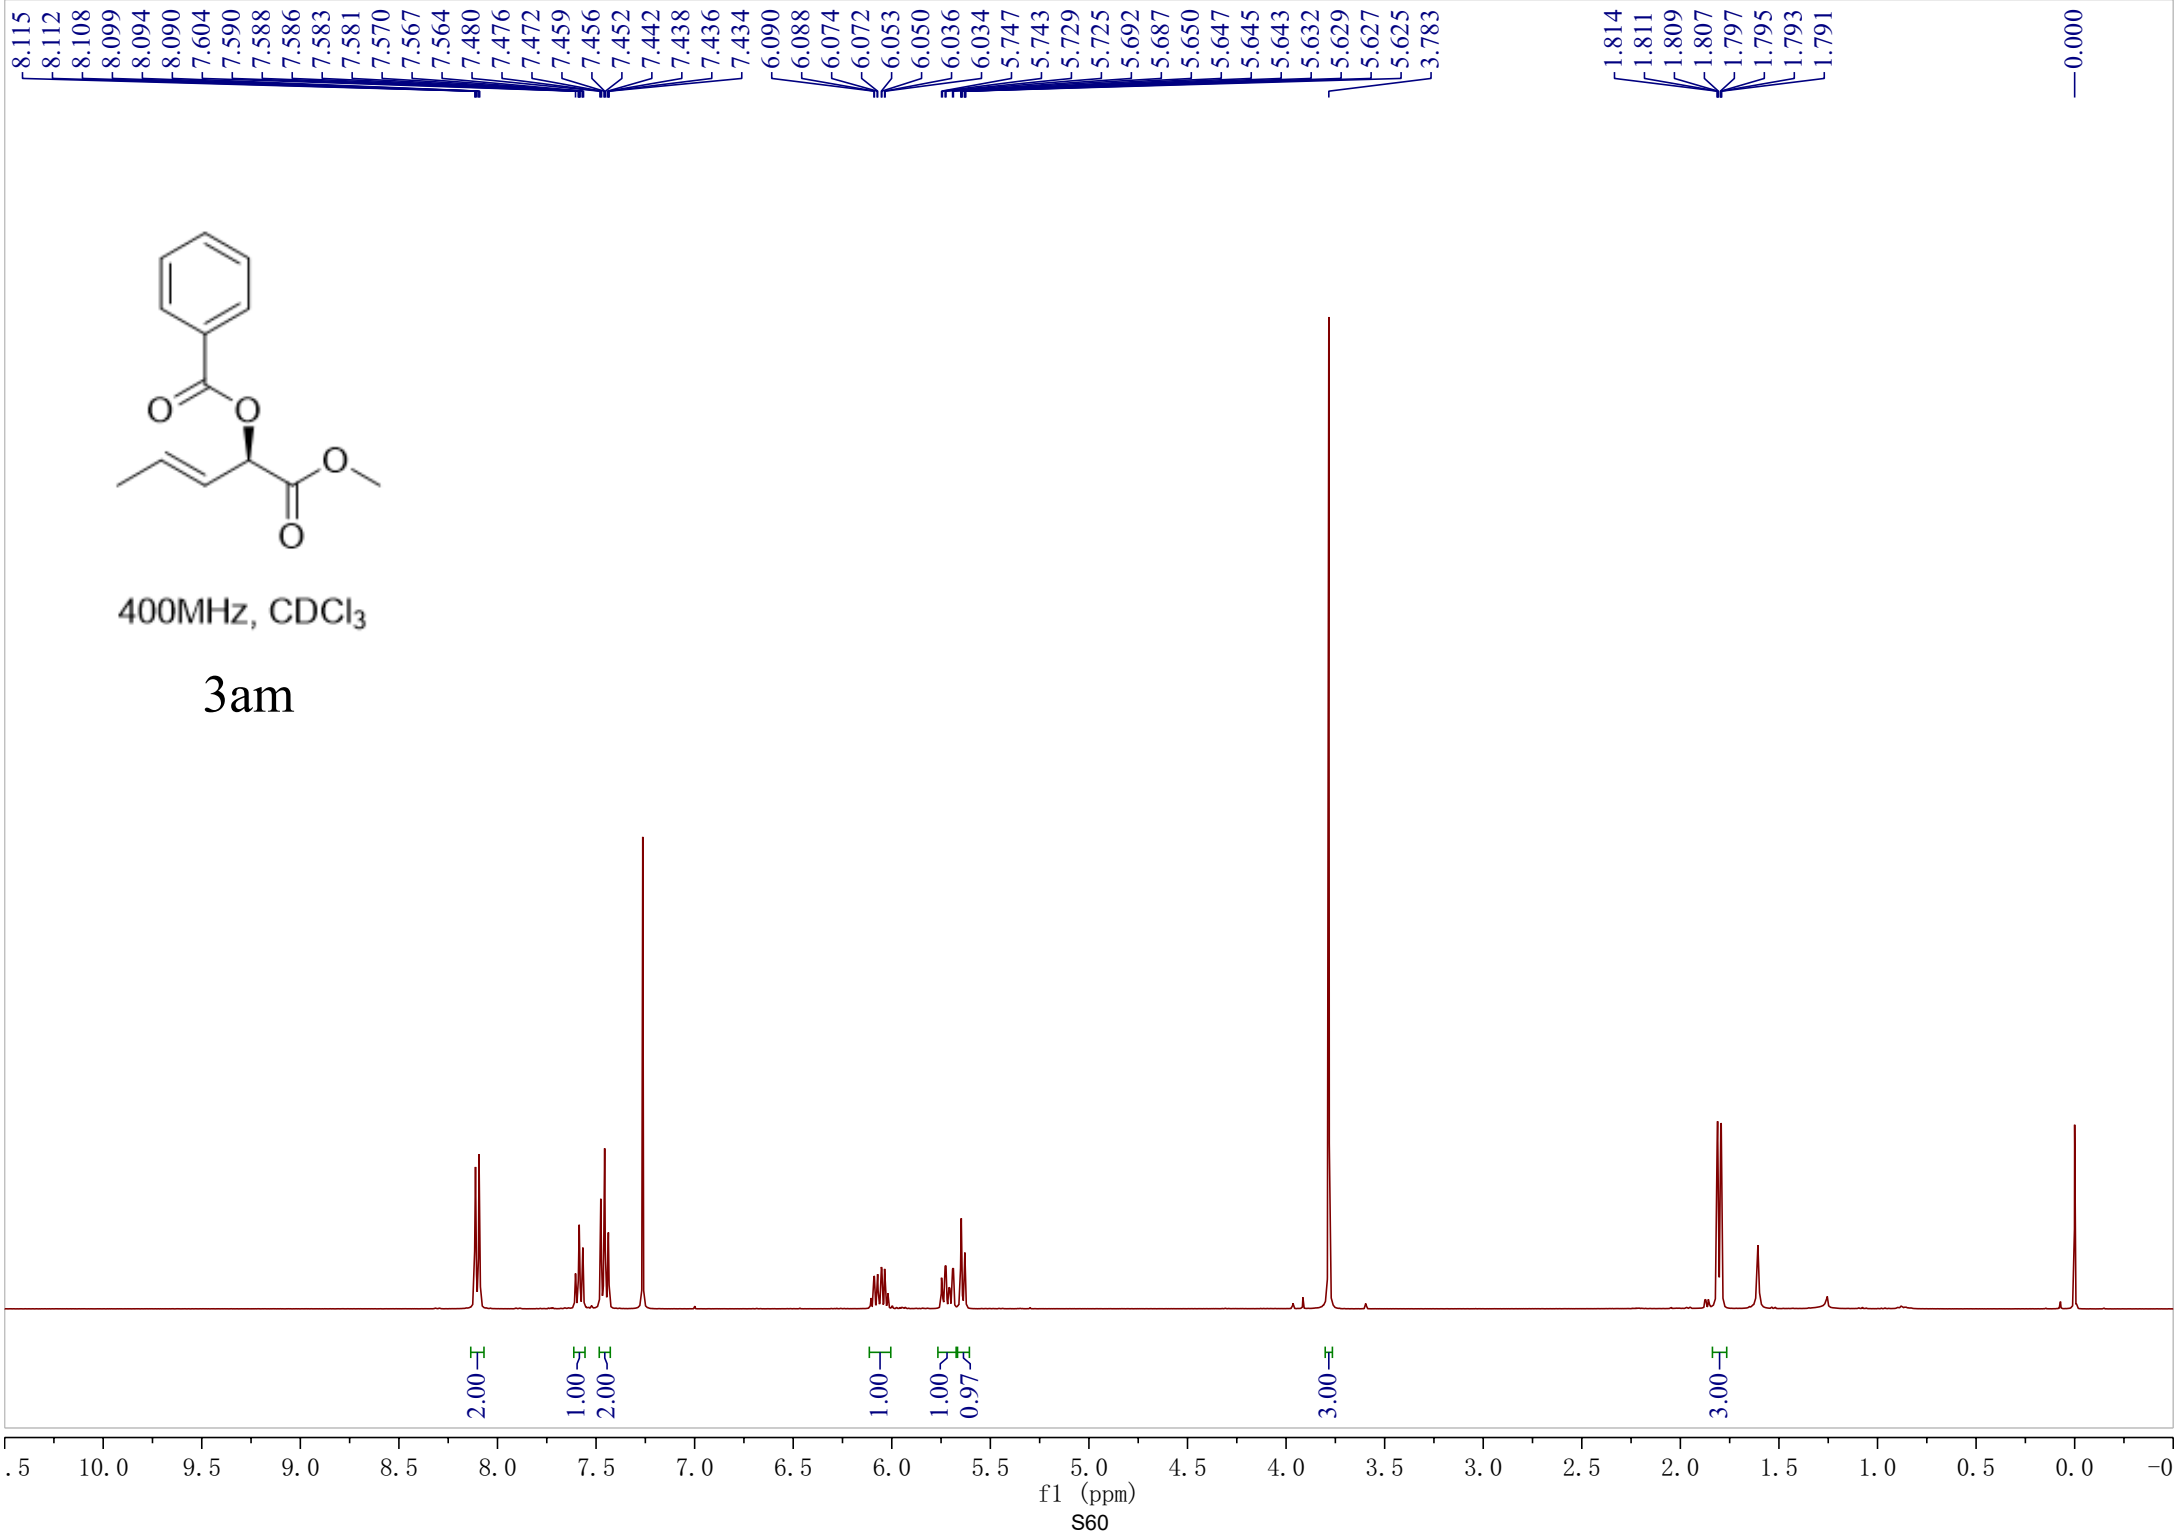

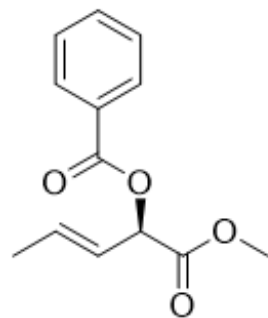

100MHz, CDCl<sub>3</sub>

3am

— 169.575  
— 165.769

— 133.394  
— 133.130  
— 129.934  
— 129.395  
— 128.434  
— 123.183

— 73.654

— 52.570

— 17.989

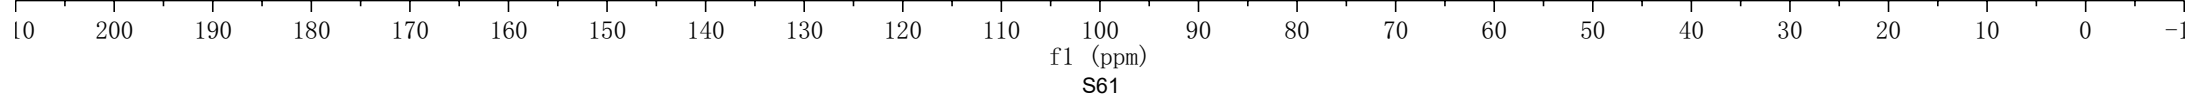

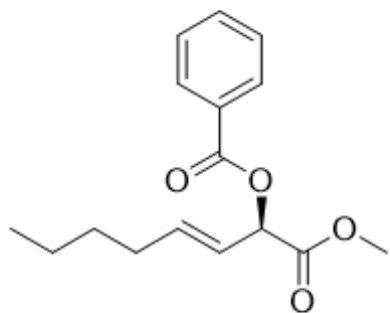

400MHz, CDCl<sub>3</sub>

3an

8.118  
8.114  
8.097  
8.093  
7.608  
7.604  
7.601  
7.586  
7.571  
7.567  
7.564  
7.478  
7.459  
7.444  
7.439  
6.079  
6.063  
6.044  
6.026  
6.009  
5.717  
5.699  
5.680  
5.662  
5.647  
5.629

3.780

2.155  
2.138  
2.120  
2.103  
1.434  
1.413  
1.396  
1.378  
1.360  
1.342  
1.323  
1.305  
0.925  
0.907  
0.889

0.000

2.00

1.03  
2.09

1.00

1.98

3.00

2.00

4.19

3.11

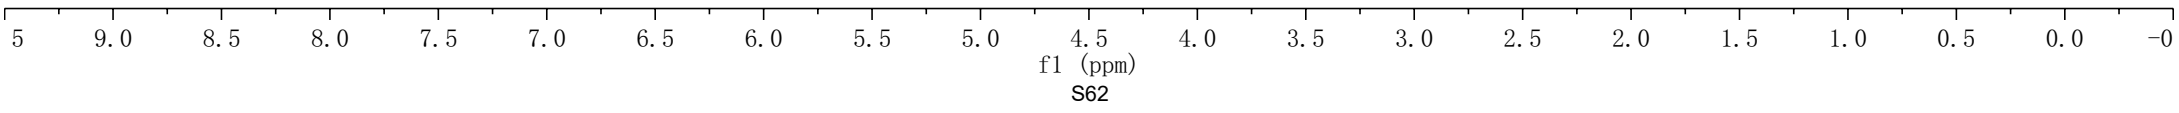



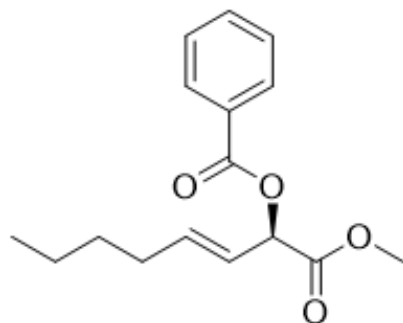

100MHz, CDCl<sub>3</sub>

3an

— 169.659  
— 165.807

— 138.305  
— 133.412  
— 129.953  
— 129.410  
— 128.452

— 121.752

— 73.773

— 52.591

— 32.082  
— 30.749

— 22.237

— 13.943

200 190 180 170 160 150 140 130 120 110 100 90 80 70 60 50 40 30 20 10 0 -1

f1 (ppm)

S63

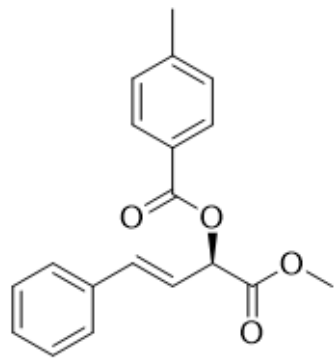

400MHz, CDCl<sub>3</sub>

3ba

8.042  
8.036  
8.032  
8.021  
8.016  
8.011  
7.451  
7.446  
7.441  
7.433  
7.429  
7.426  
7.366  
7.362  
7.357  
7.350  
7.345  
7.340  
7.329  
7.326  
7.309  
7.305  
7.302  
7.288  
7.274  
7.269  
7.254  
7.250  
6.920  
6.880  
6.425  
6.408  
6.385  
6.368  
5.869  
5.865  
5.851  
5.848  
3.801

2.418

0.000

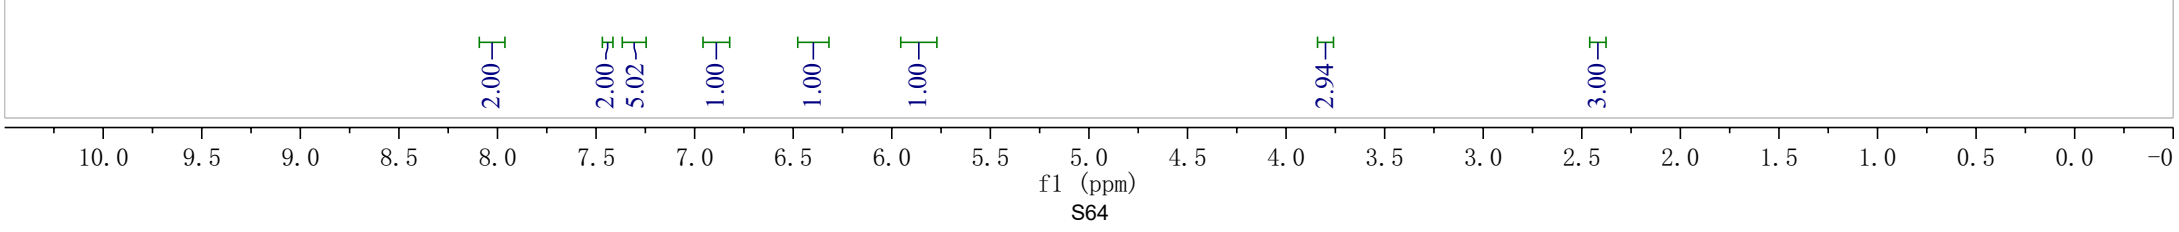

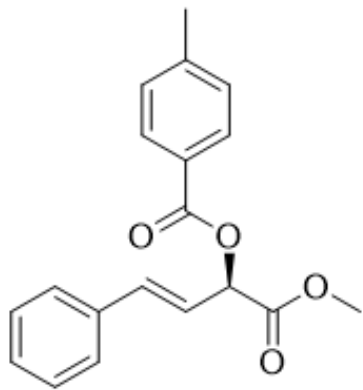

100MHz, CDCl<sub>3</sub>

3ba

—169.279  
—165.773

—144.310  
—135.631  
—135.367  
—130.038  
—129.219  
—128.714  
—128.603  
—126.898  
—126.547  
—121.084

—73.460

—52.715

—21.758

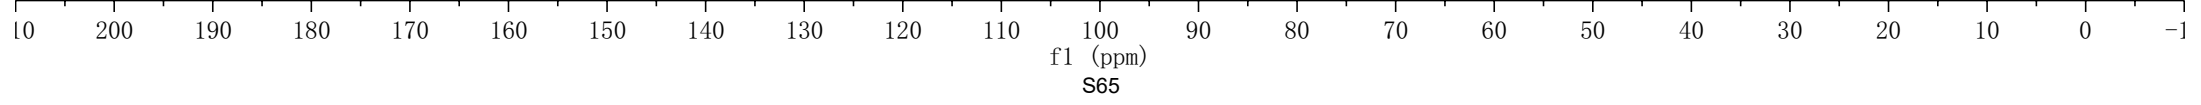

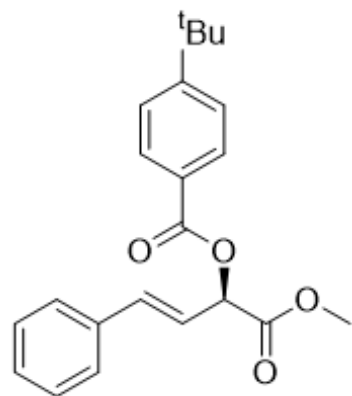

400MHz, CDCl<sub>3</sub>

3ca

8.084  
8.079  
8.067  
8.062  
7.498  
7.493  
7.481  
7.476  
7.452  
7.448  
7.434  
7.430  
7.427  
7.362  
7.345  
7.341  
7.326  
7.304  
7.287  
6.920  
6.880  
6.433  
6.416  
6.393  
6.376  
5.883  
5.879  
5.865  
5.862

3.797

1.343

-0.000

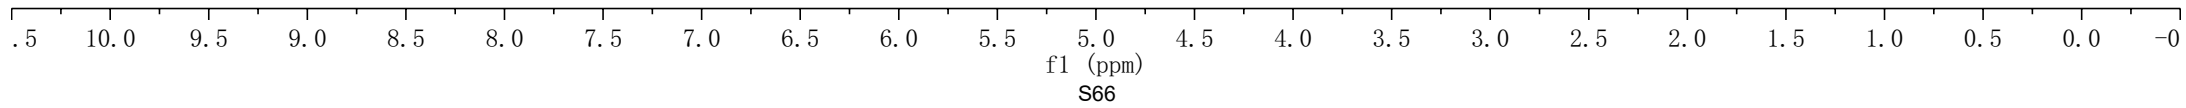

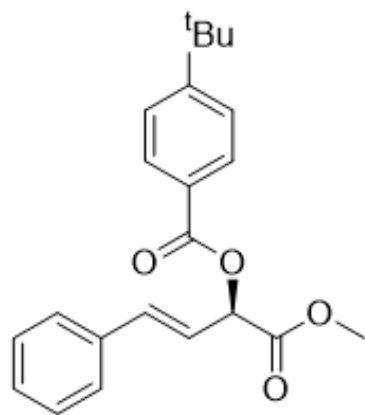

100MHz, CDCl<sub>3</sub>

3ca

— 169.261

— 165.723

— 157.276

— 135.648

— 135.239

— 129.902

— 128.725

— 128.597

— 126.901

— 126.505

— 125.510

— 121.113

— 73.401

— 52.726

— 35.190

— 31.134

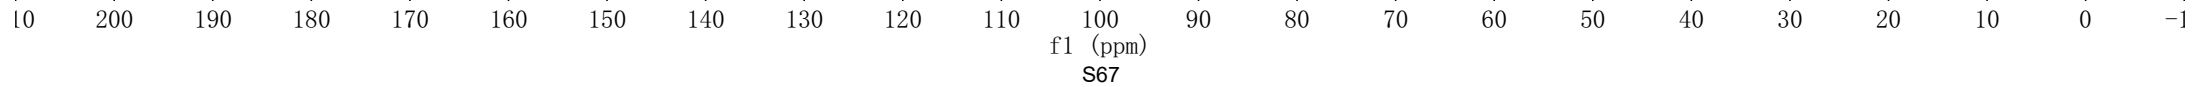

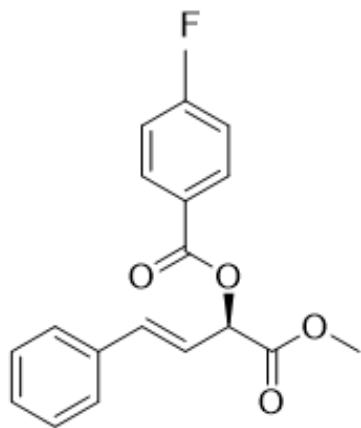

400MHz, CDCl<sub>3</sub>

3da

8.184  
8.176  
8.171  
8.163  
8.159  
8.154  
8.146  
8.141  
8.133  
7.458  
7.454  
7.448  
7.441  
7.437  
7.433  
7.379  
7.375  
7.370  
7.358  
7.353  
7.342  
7.338  
7.325  
7.321  
7.317  
7.303  
7.258  
7.168  
7.163  
7.152  
7.146  
7.130  
7.125  
6.920  
6.880  
6.416  
6.398  
6.377  
6.359  
5.865  
5.862  
5.847  
5.844  
3.814

0.000

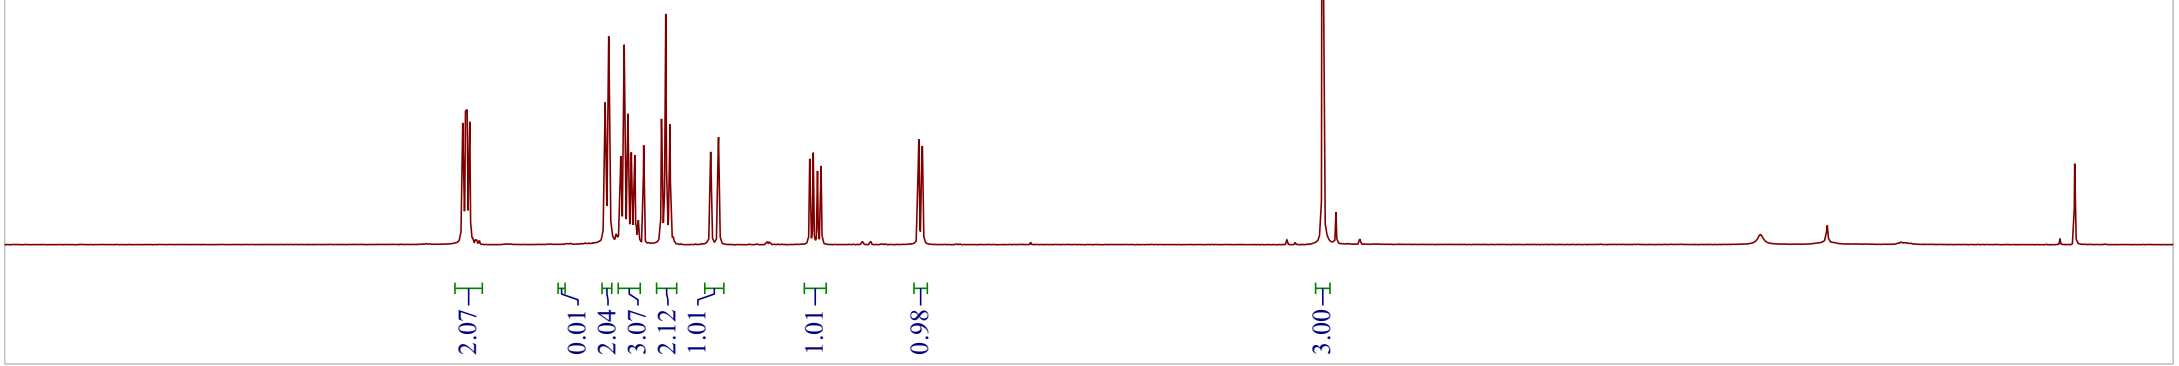

f1 (ppm)  
S68

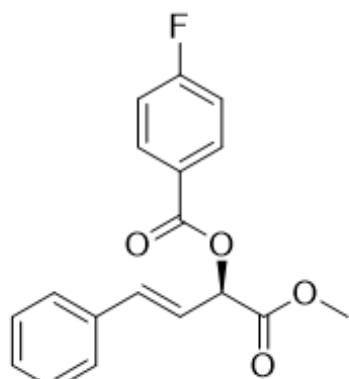

100MHz, CDCl<sub>3</sub>

3da

169.095  
167.394  
164.860  
164.744

135.712  
135.487  
132.660  
132.566  
128.744  
128.714  
126.904  
125.554  
125.525  
120.752  
115.830  
115.610

73.716

52.794

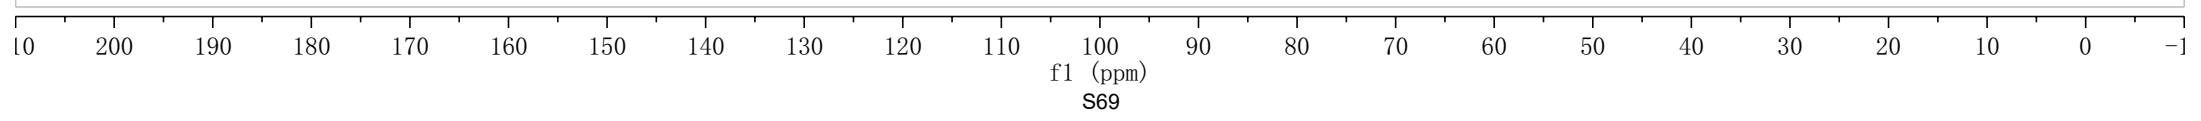

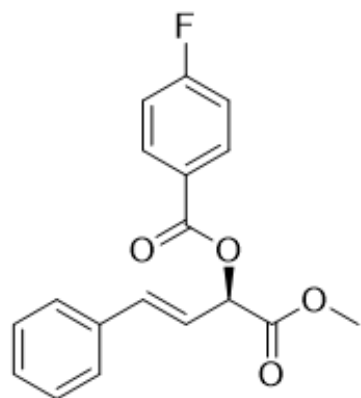

282MHz, CDCl<sub>3</sub>

3da

— -104.611

10 0 -10 -20 -30 -40 -50 -60 -70 -80 -90 -100 -110 -120 -130 -140 -150 -160 -170 -180 -190 -200 -210

f1 (ppm)

S70



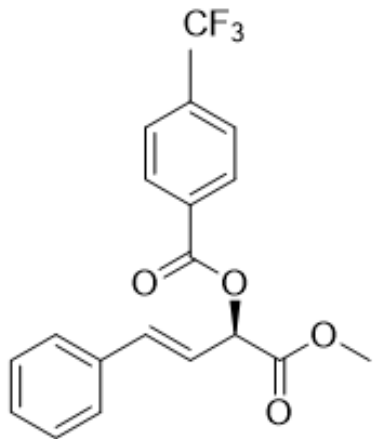

400MHz, CDCl<sub>3</sub>

3ea

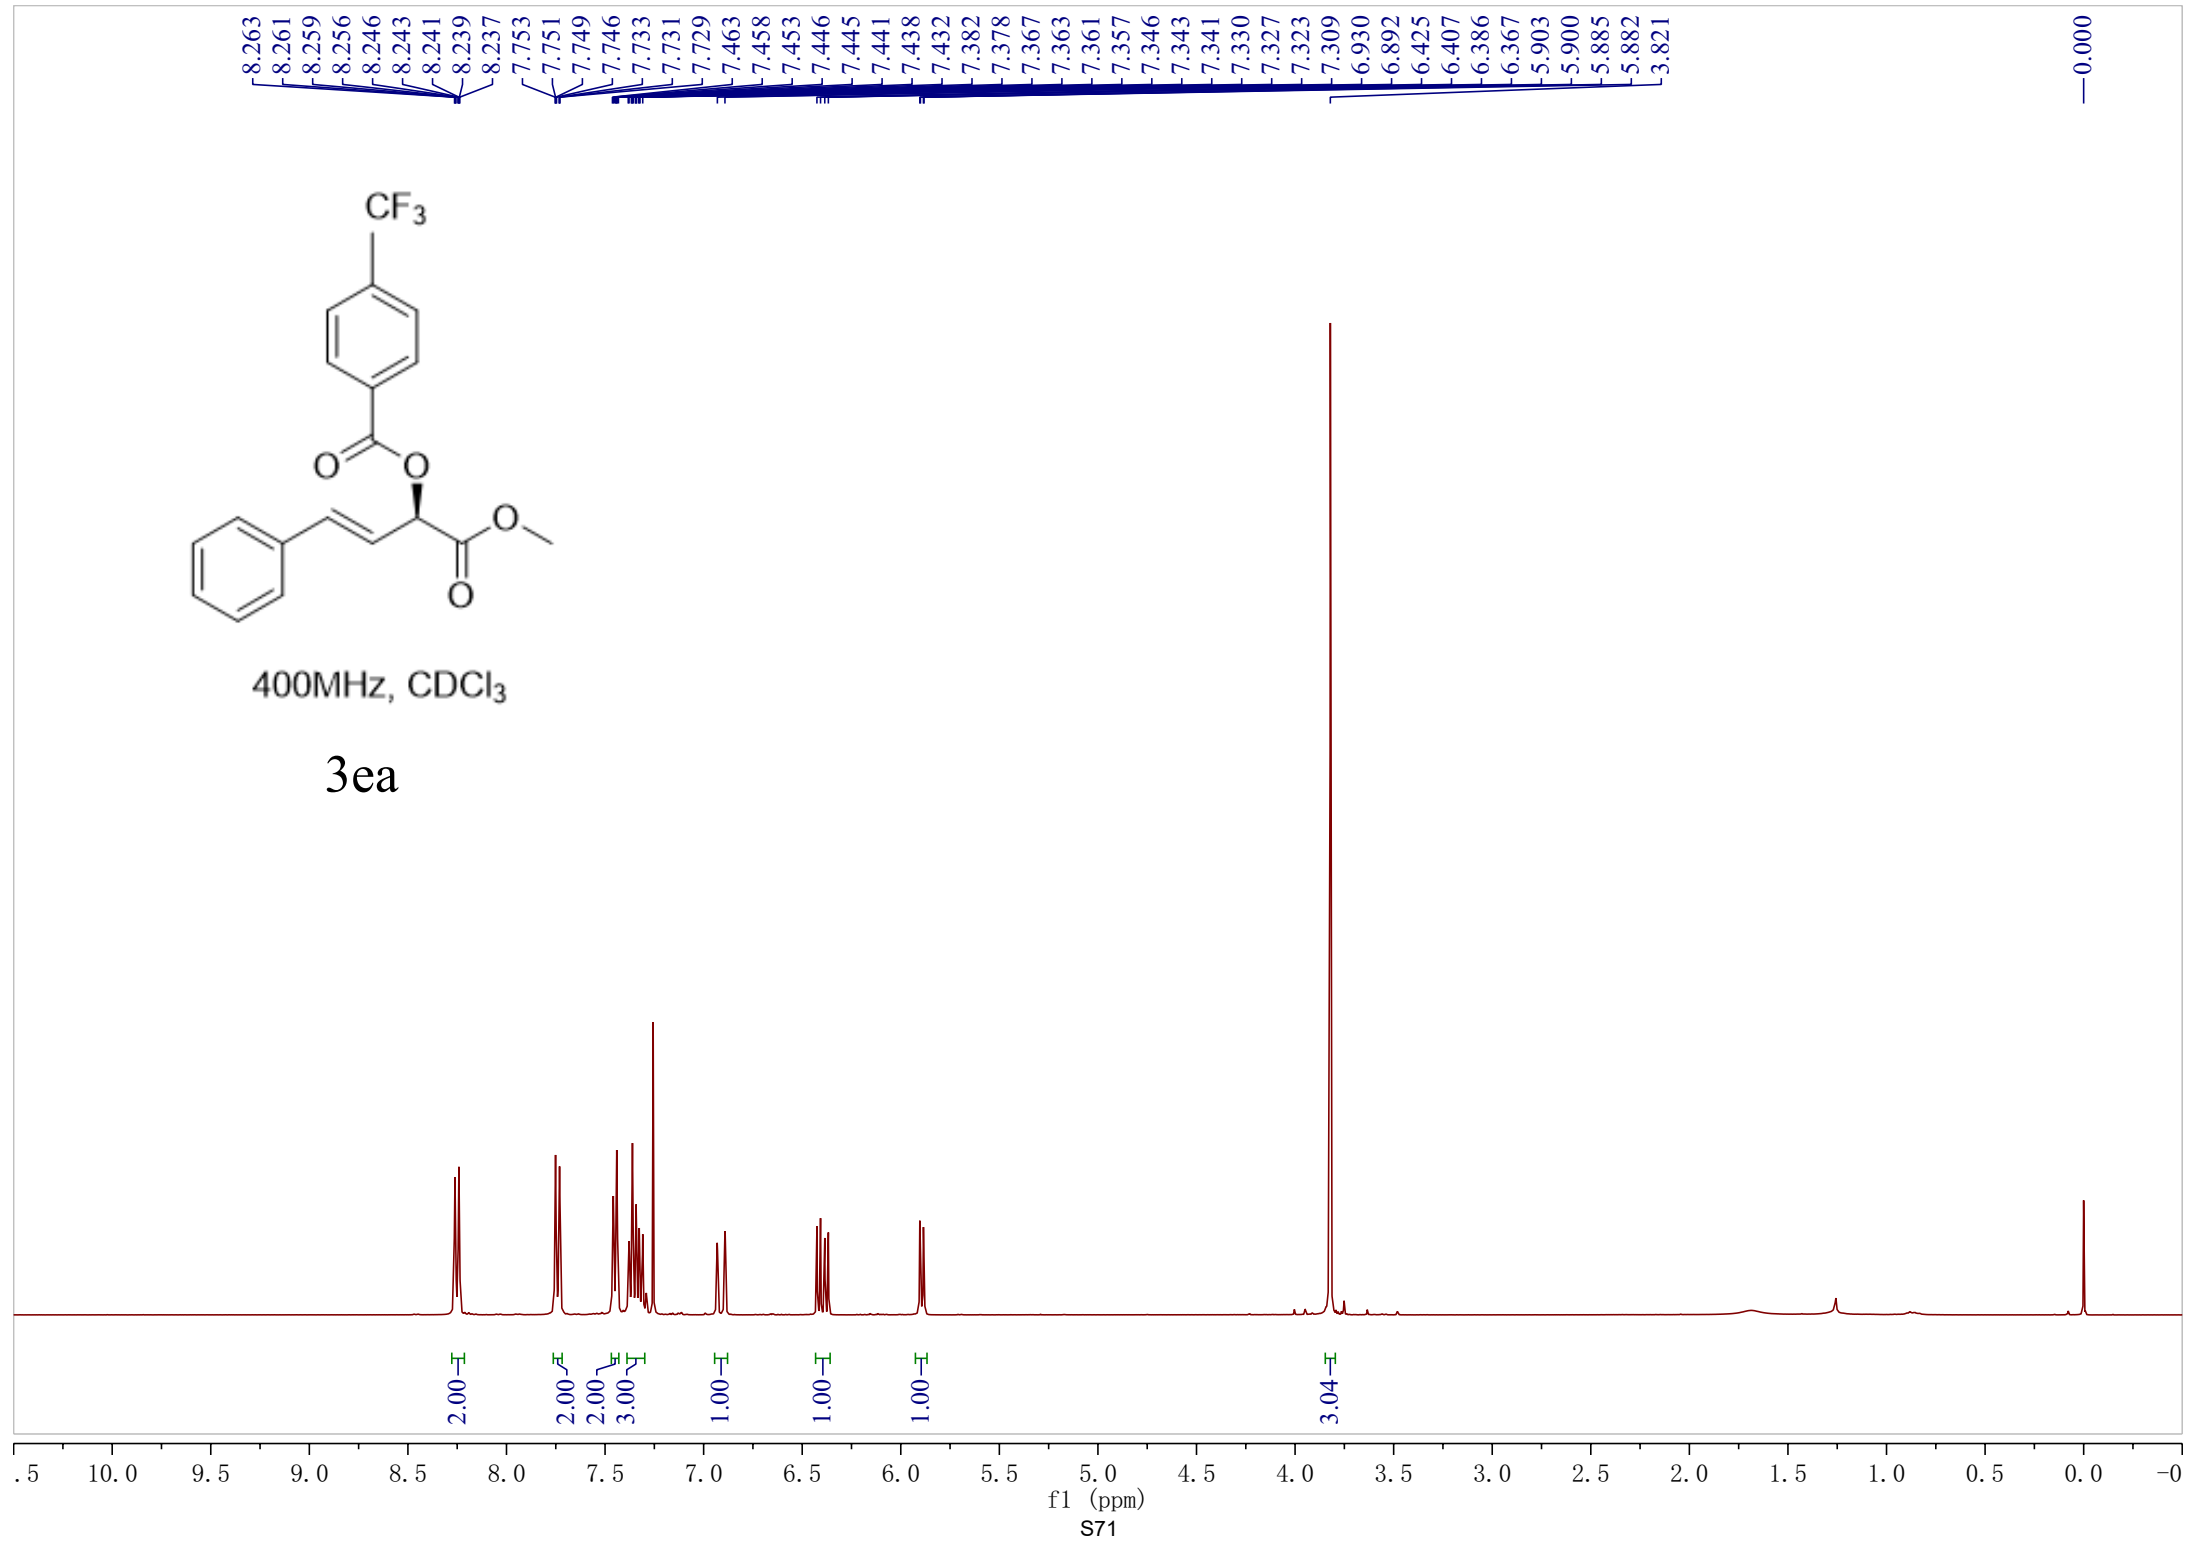

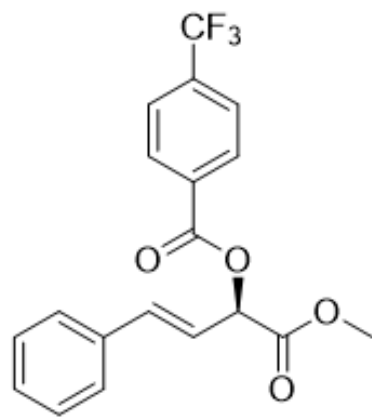

100MHz, CDCl<sub>3</sub>

3ea

- 168.862
- 164.552
- 136.051
- 135.377
- 135.105
- 134.780
- 132.536
- 130.397
- 128.816
- 128.775
- 126.931
- 125.612
- 125.575
- 125.538
- 125.500
- 124.938
- 122.228
- 120.424
- 74.066
- 52.876

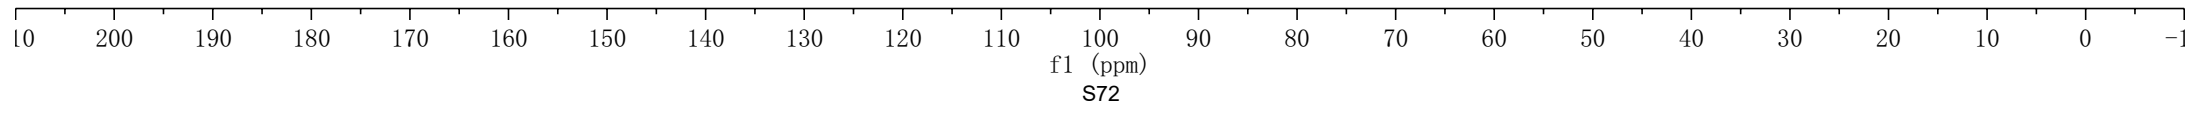

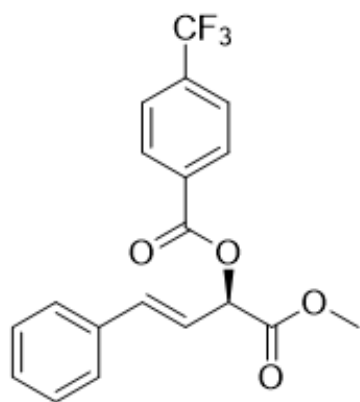

282MHz, CDCl<sub>3</sub>

3ea

-63.163

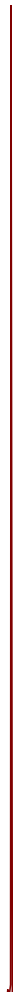

10 0 -10 -20 -30 -40 -50 -60 -70 -80 -90 -100 -110 -120 -130 -140 -150 -160 -170 -180 -190 -200 -210

f1 (ppm)

S73

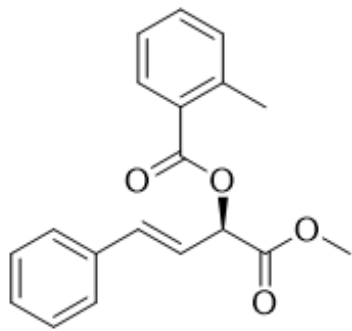

400MHz, CDCl<sub>3</sub>

3fa

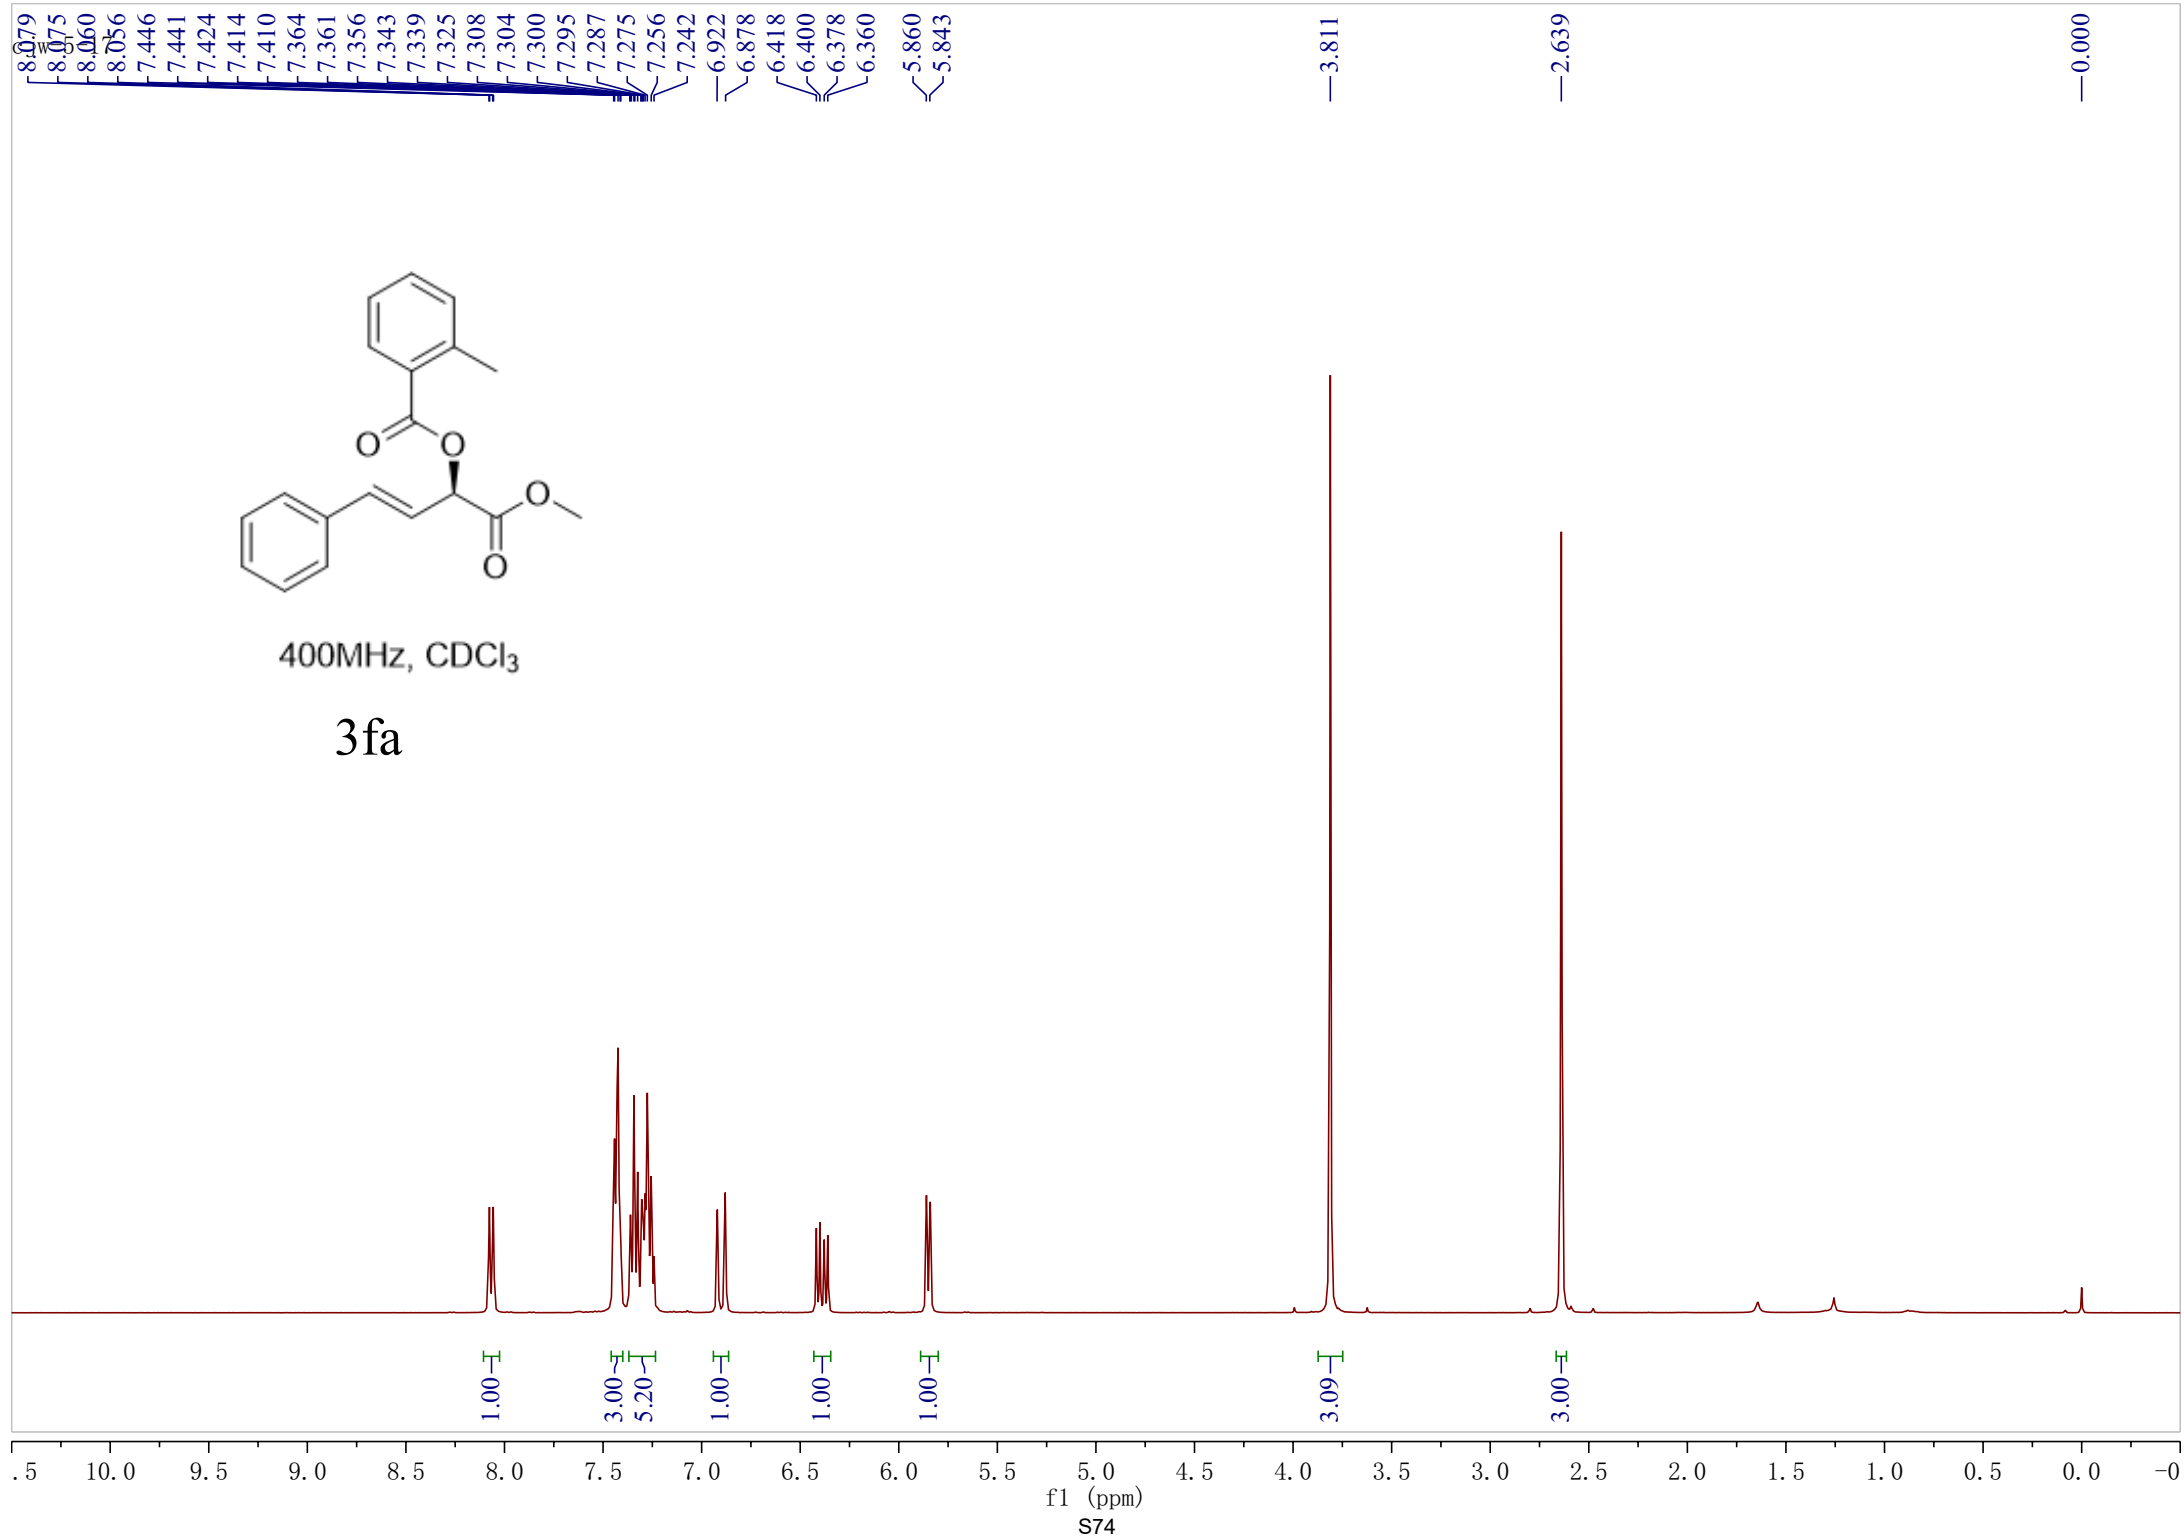

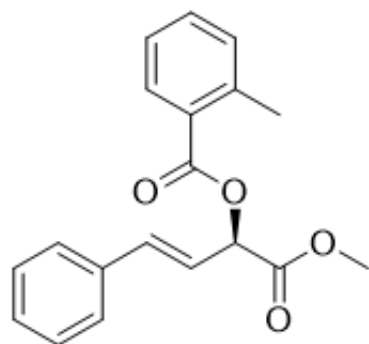

100MHz, CDCl<sub>3</sub>

3fa

169.400  
166.662

140.841  
135.644  
135.488  
132.613  
131.842  
131.062  
128.799  
128.701  
128.668  
126.961  
125.930  
120.988

73.588

52.843

21.848

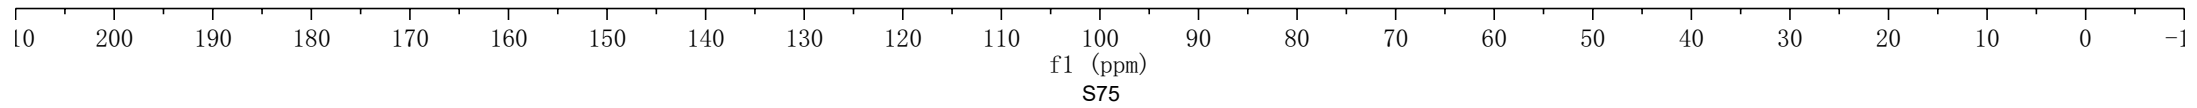

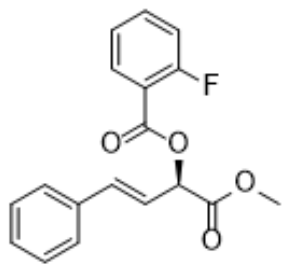

400MHz, CDCl<sub>3</sub>

3ga

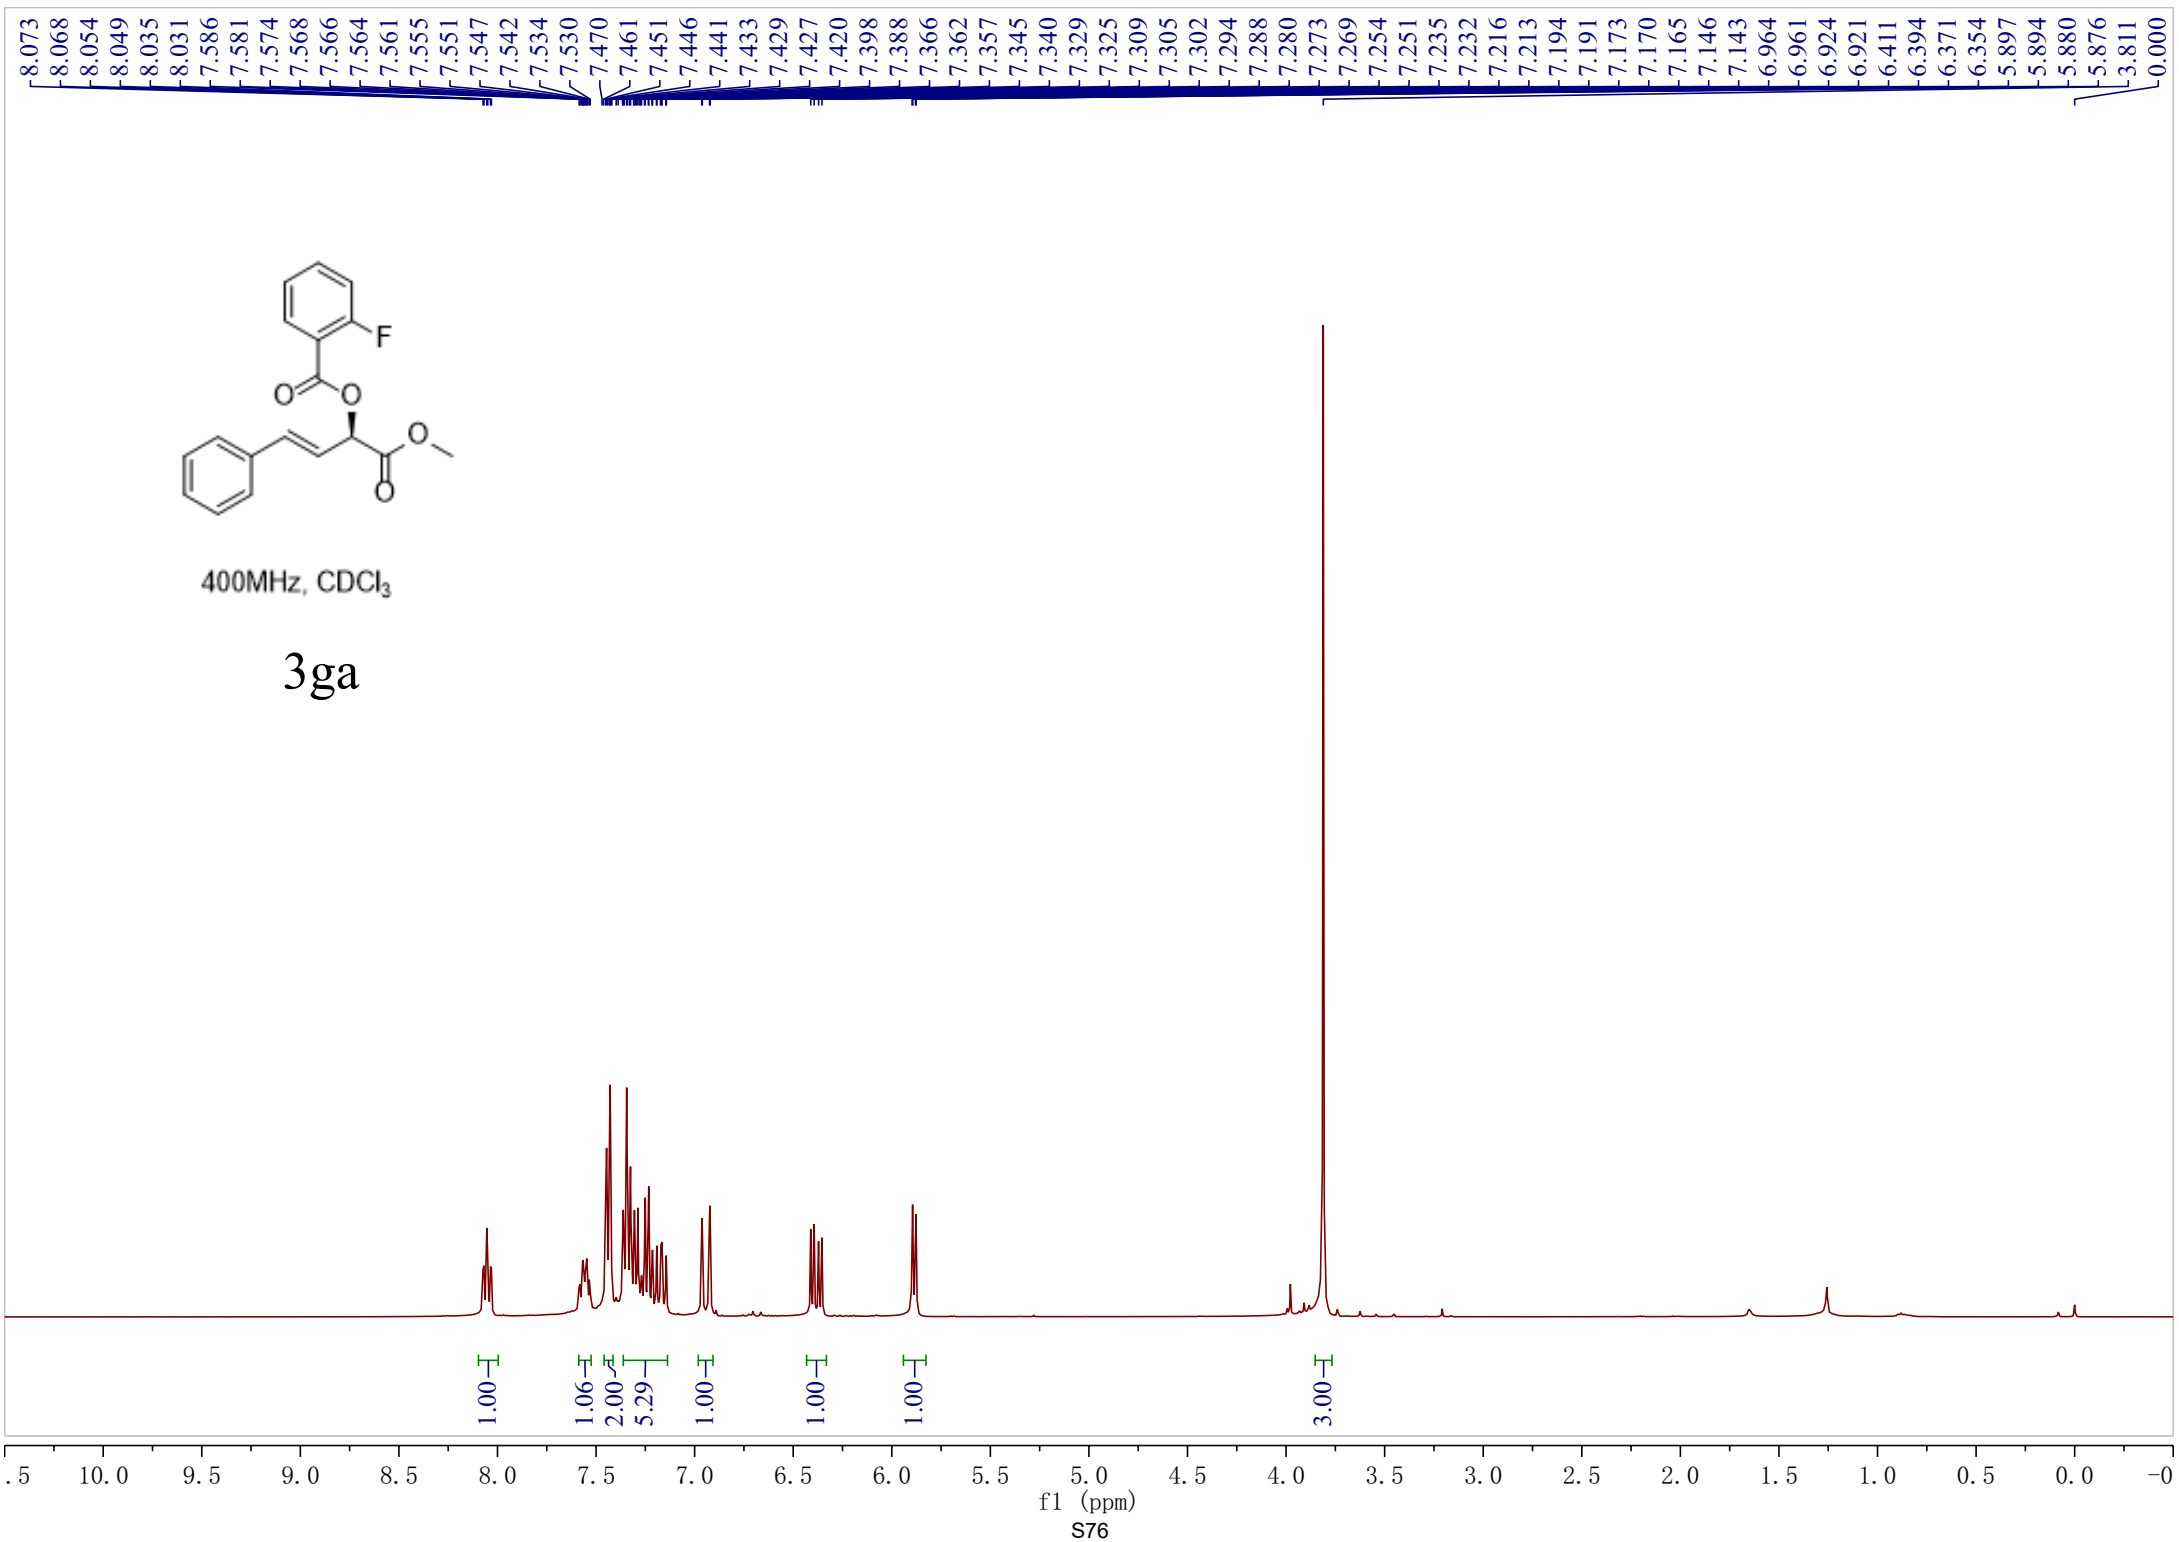

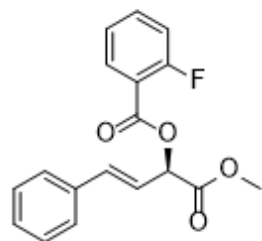

100MHz, CDCl<sub>3</sub>

3ga

168.940  
163.615  
163.386  
163.350  
161.017  
135.596  
135.409  
135.217  
135.127  
132.455  
128.726  
128.635  
126.930  
124.132  
124.092  
120.546  
117.841  
117.748  
117.261  
117.041

73.763

52.827

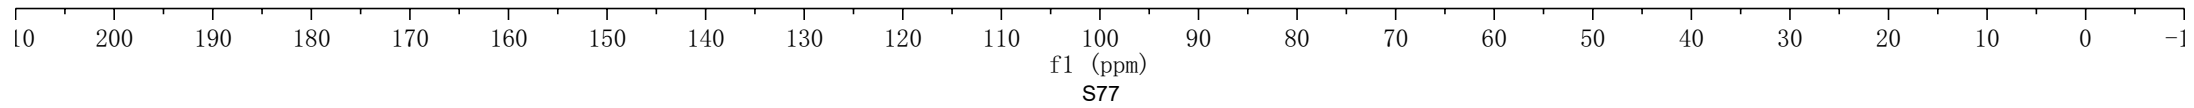

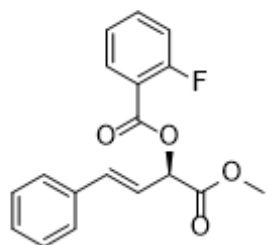

282MHz, CDCl<sub>3</sub>

3ga

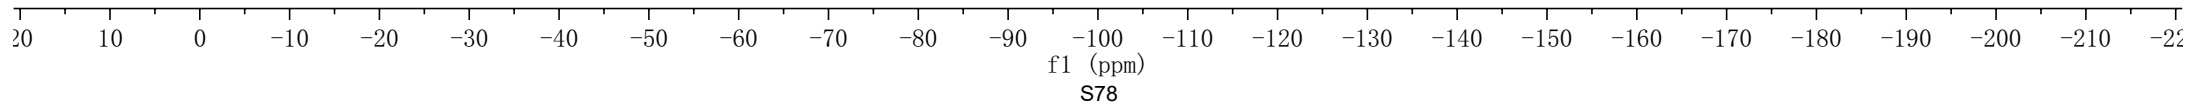



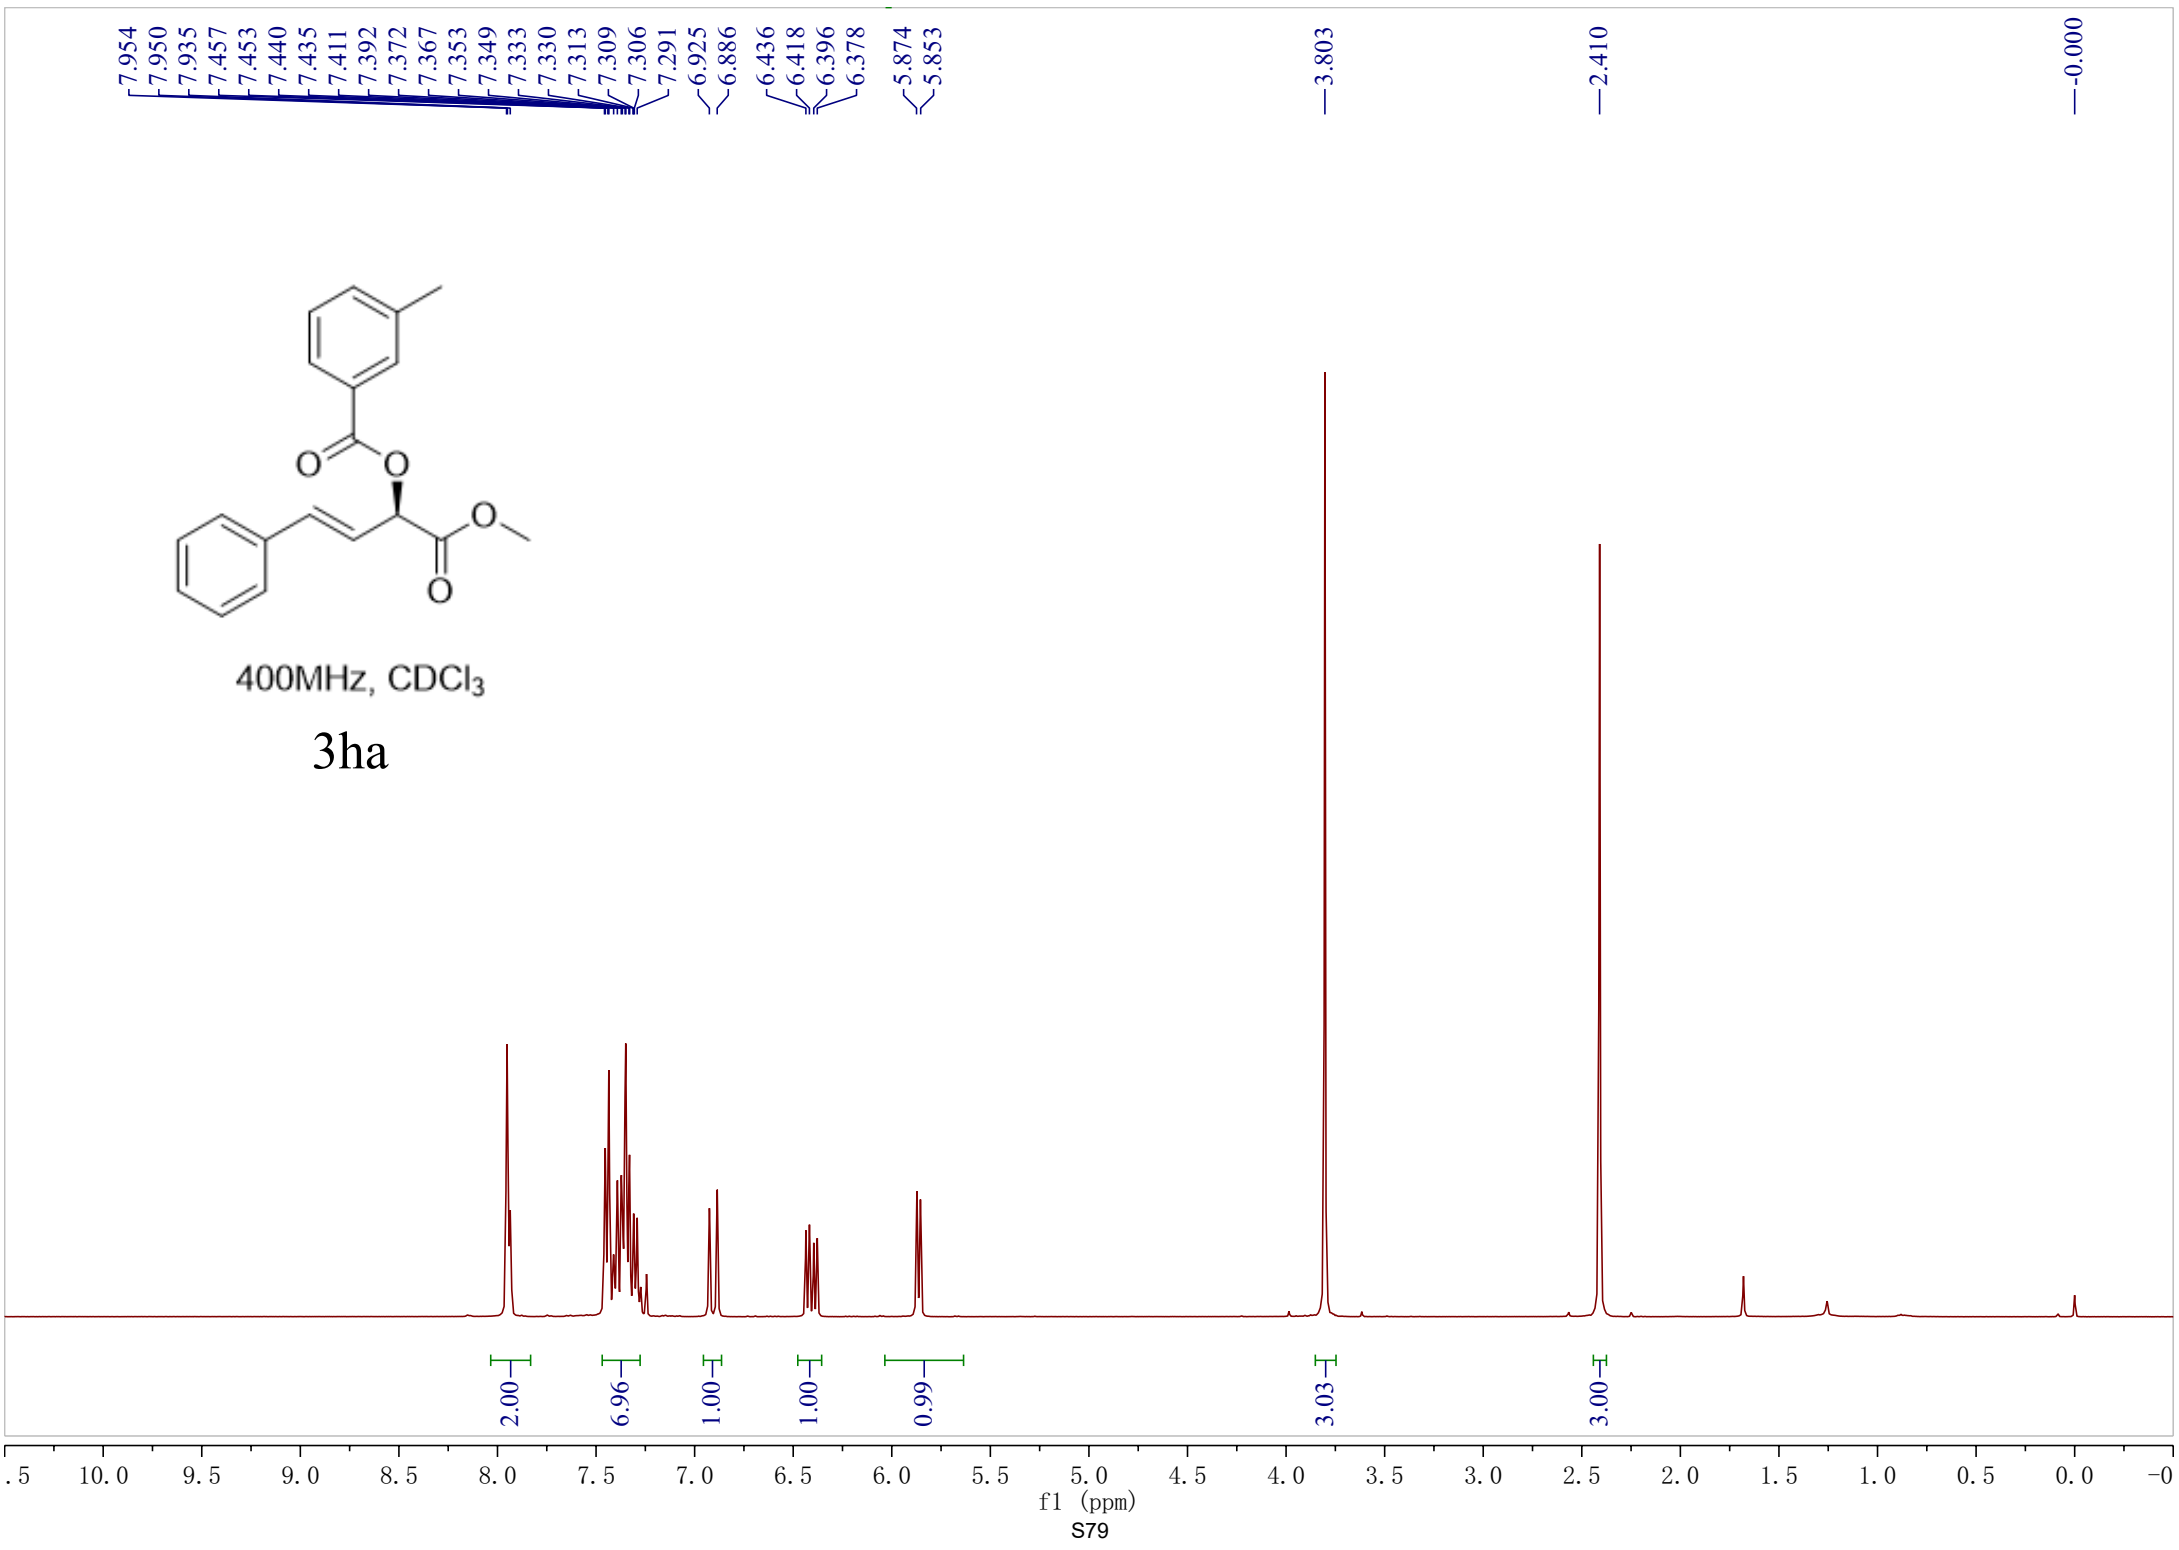

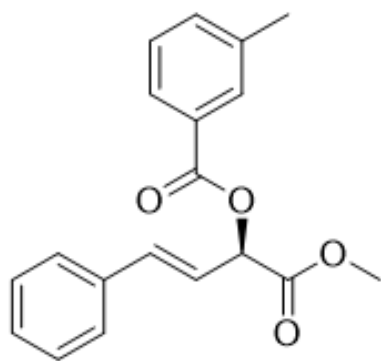

100MHz, CDCl<sub>3</sub>

3ha

—169.316  
—165.971

138.389  
135.609  
135.591  
134.392  
130.542  
129.195  
128.795  
128.718  
128.480  
127.226  
126.970  
120.994

—73.672

—52.843

—21.376

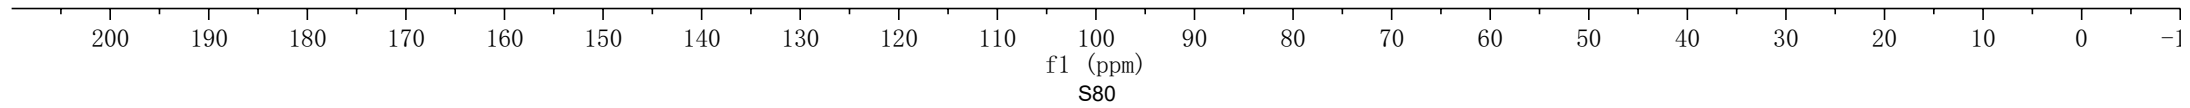

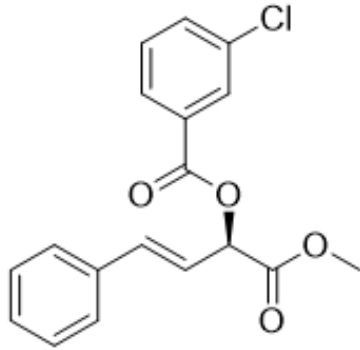

400MHz, CDCl<sub>3</sub>

3ia

8.113  
8.109  
8.104  
8.030  
8.027  
8.024  
8.011  
8.008  
8.004  
7.580  
7.577  
7.575  
7.572  
7.560  
7.557  
7.554  
7.552  
7.460  
7.455  
7.450  
7.442  
7.438  
7.435  
7.431  
7.412  
7.392  
7.377  
7.373  
7.355  
7.351  
7.340  
7.336  
7.323  
7.319  
7.315  
7.301  
6.919  
6.882  
6.417  
6.399  
6.377  
6.359  
5.874  
5.871  
5.856  
5.852  
3.812  
0.000

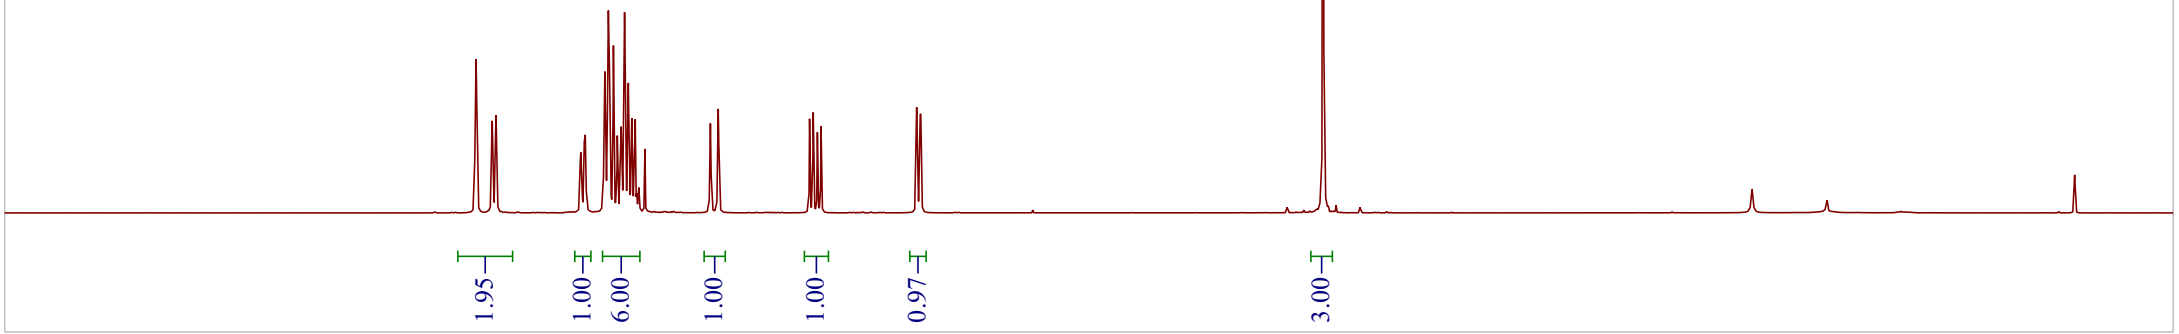

10.0  
9.5  
9.0  
8.5  
8.0  
7.5  
7.0  
6.5  
6.0  
5.5  
5.0  
4.5  
4.0  
3.5  
3.0  
2.5  
2.0  
1.5  
1.0  
0.5  
0.0  
-0.5

f1 (ppm)  
S81

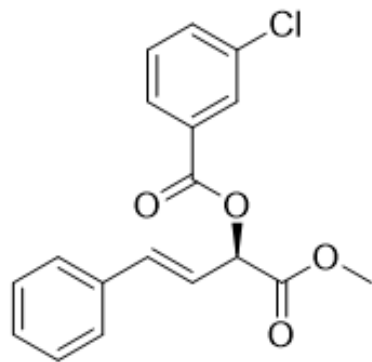

100MHz, CDCl<sub>3</sub>

3ia

— 168.950  
— 164.556  
— 135.961  
— 135.420  
— 134.683  
— 133.574  
— 131.010  
— 130.018  
— 129.866  
— 128.781  
— 128.766  
— 128.140  
— 126.944  
— 120.543

— 73.975

— 52.863

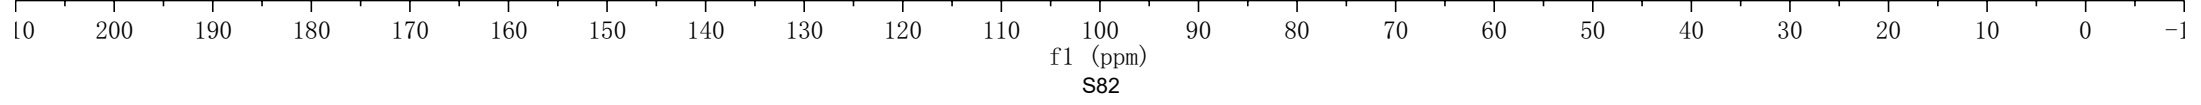

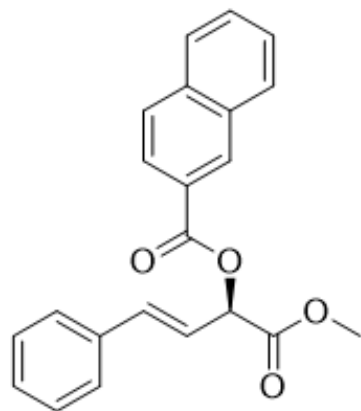

400MHz, CDCl<sub>3</sub>

3ja

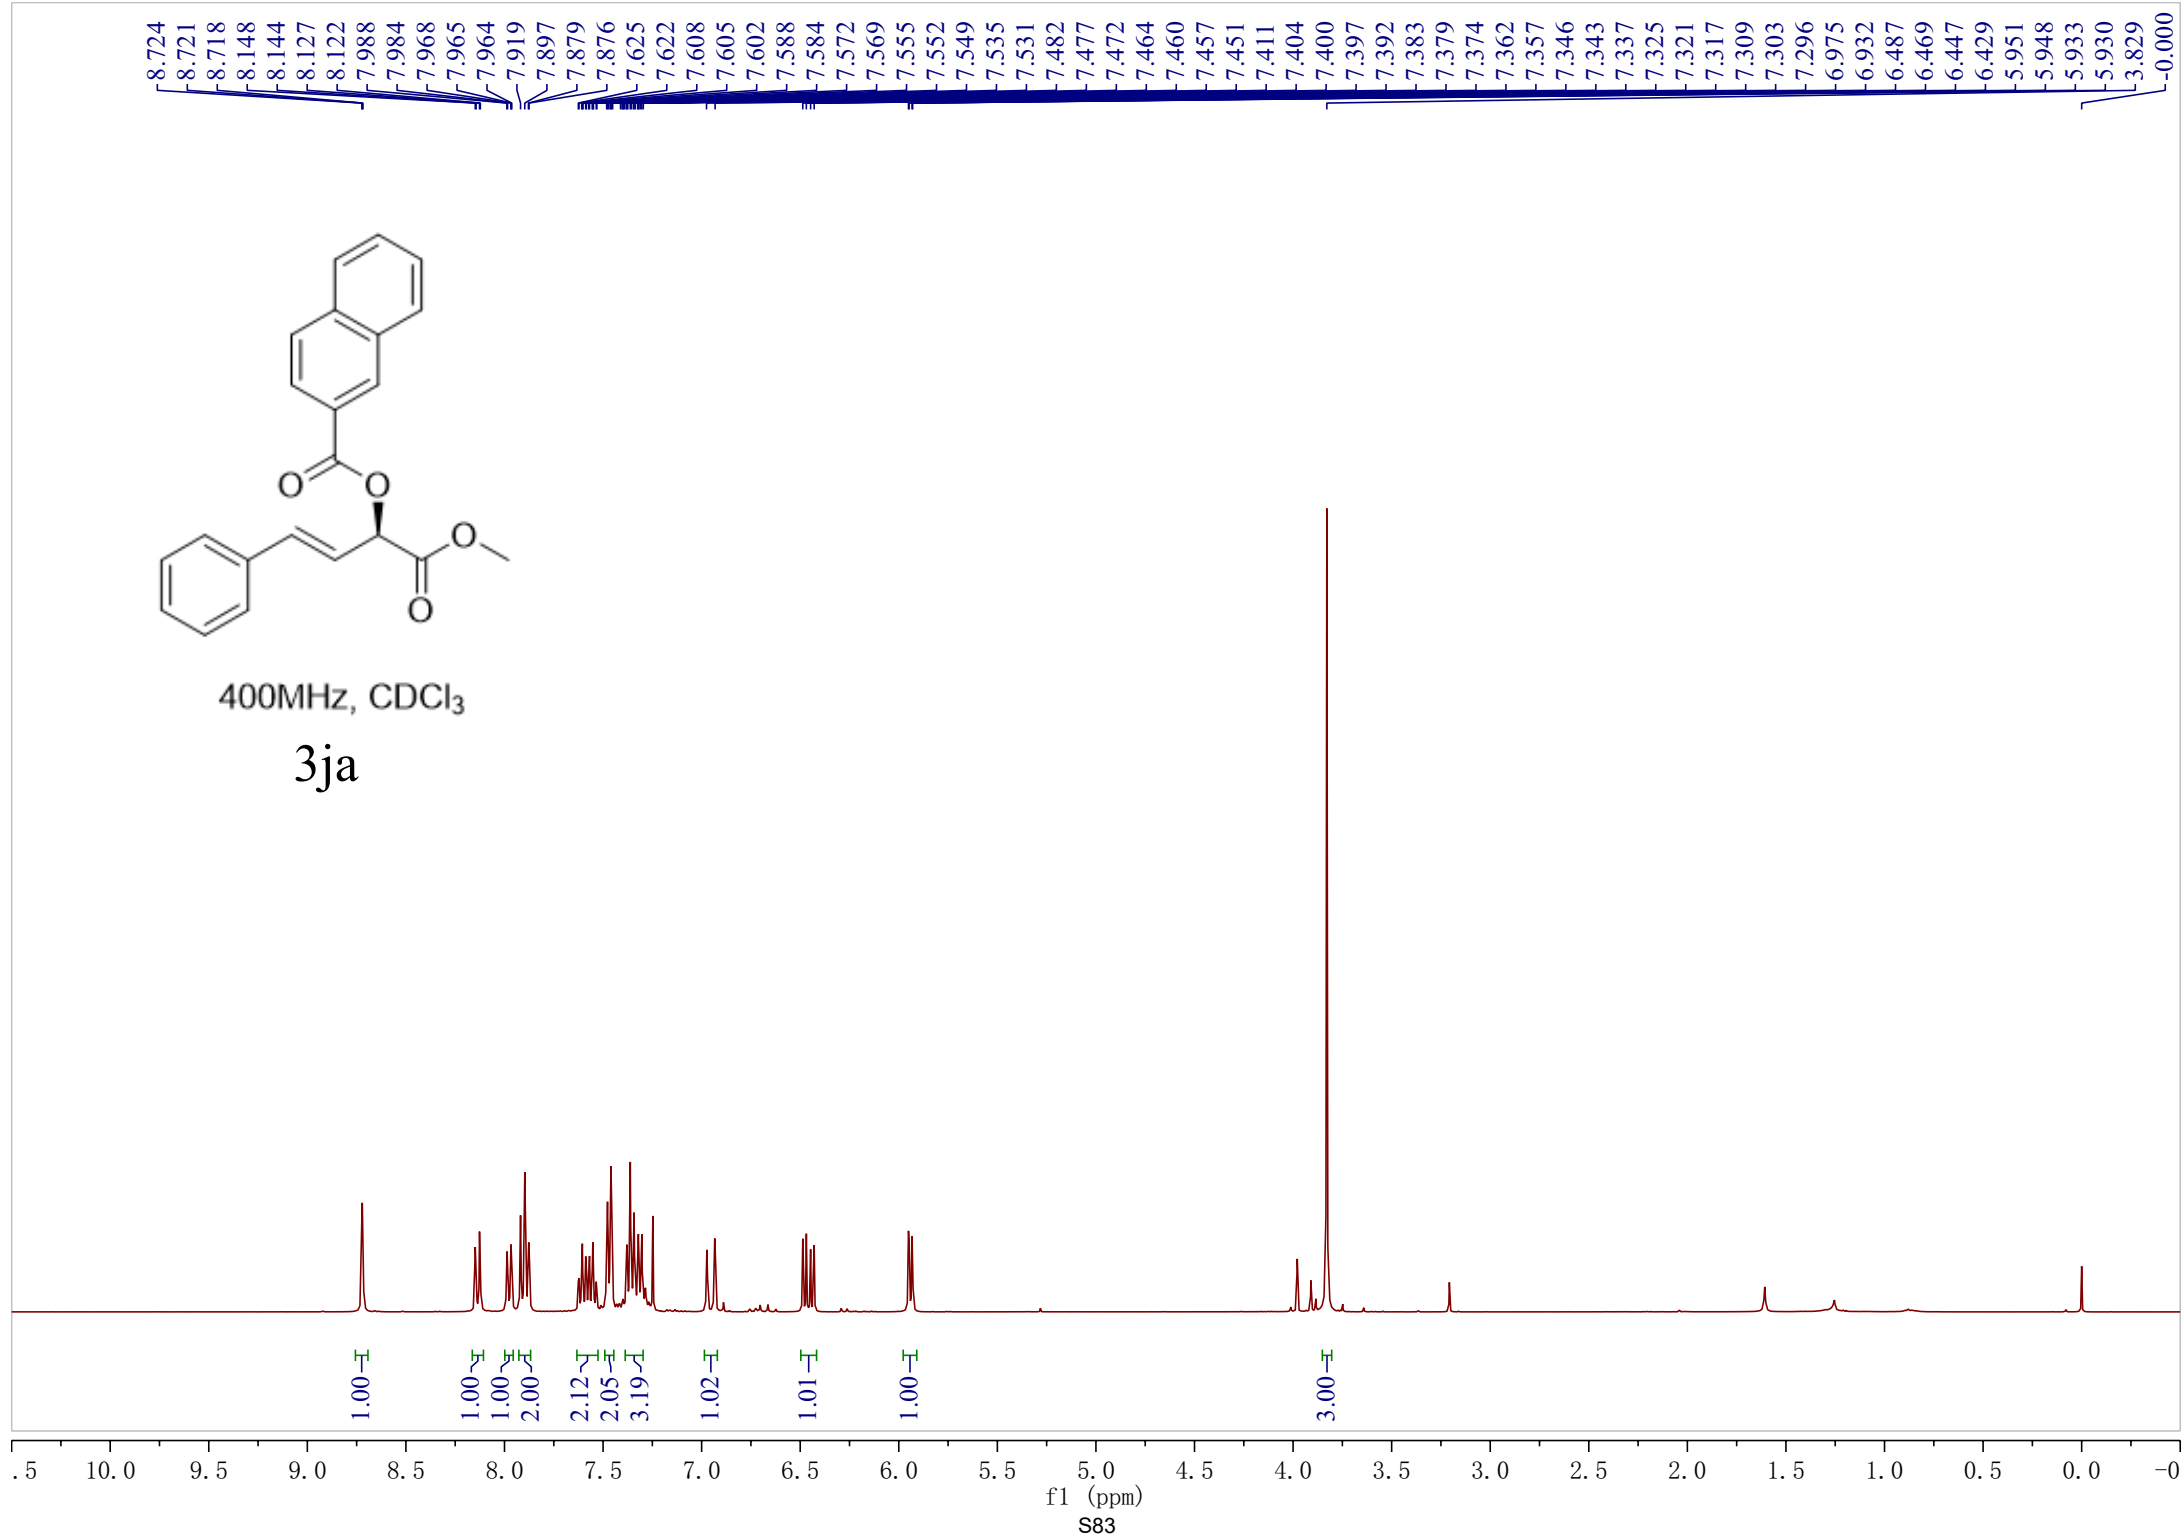

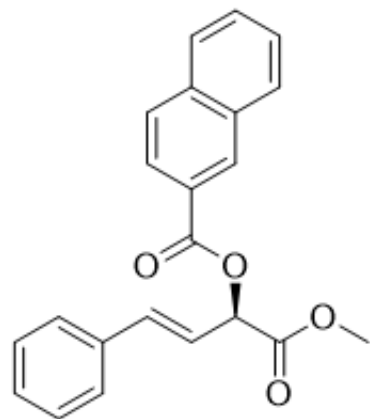

100MHz, CDCl<sub>3</sub>

3ja

—169.279  
—165.913

135.816  
135.701  
135.578  
132.470  
131.737  
129.509  
128.763  
128.700  
128.573  
128.349  
127.847  
126.951  
126.804  
126.478  
125.349  
120.977

—73.806

—52.826

10 200 190 180 170 160 150 140 130 120 110 100 90 80 70 60 50 40 30 20 10 0 -1  
f1 (ppm)  
S84

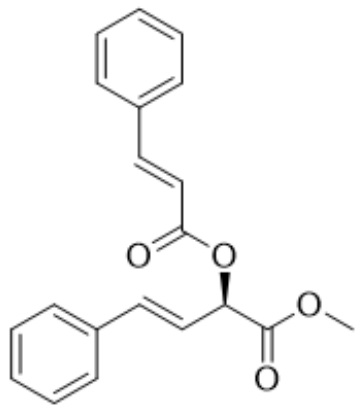

400MHz, CDCl<sub>3</sub>

3ka

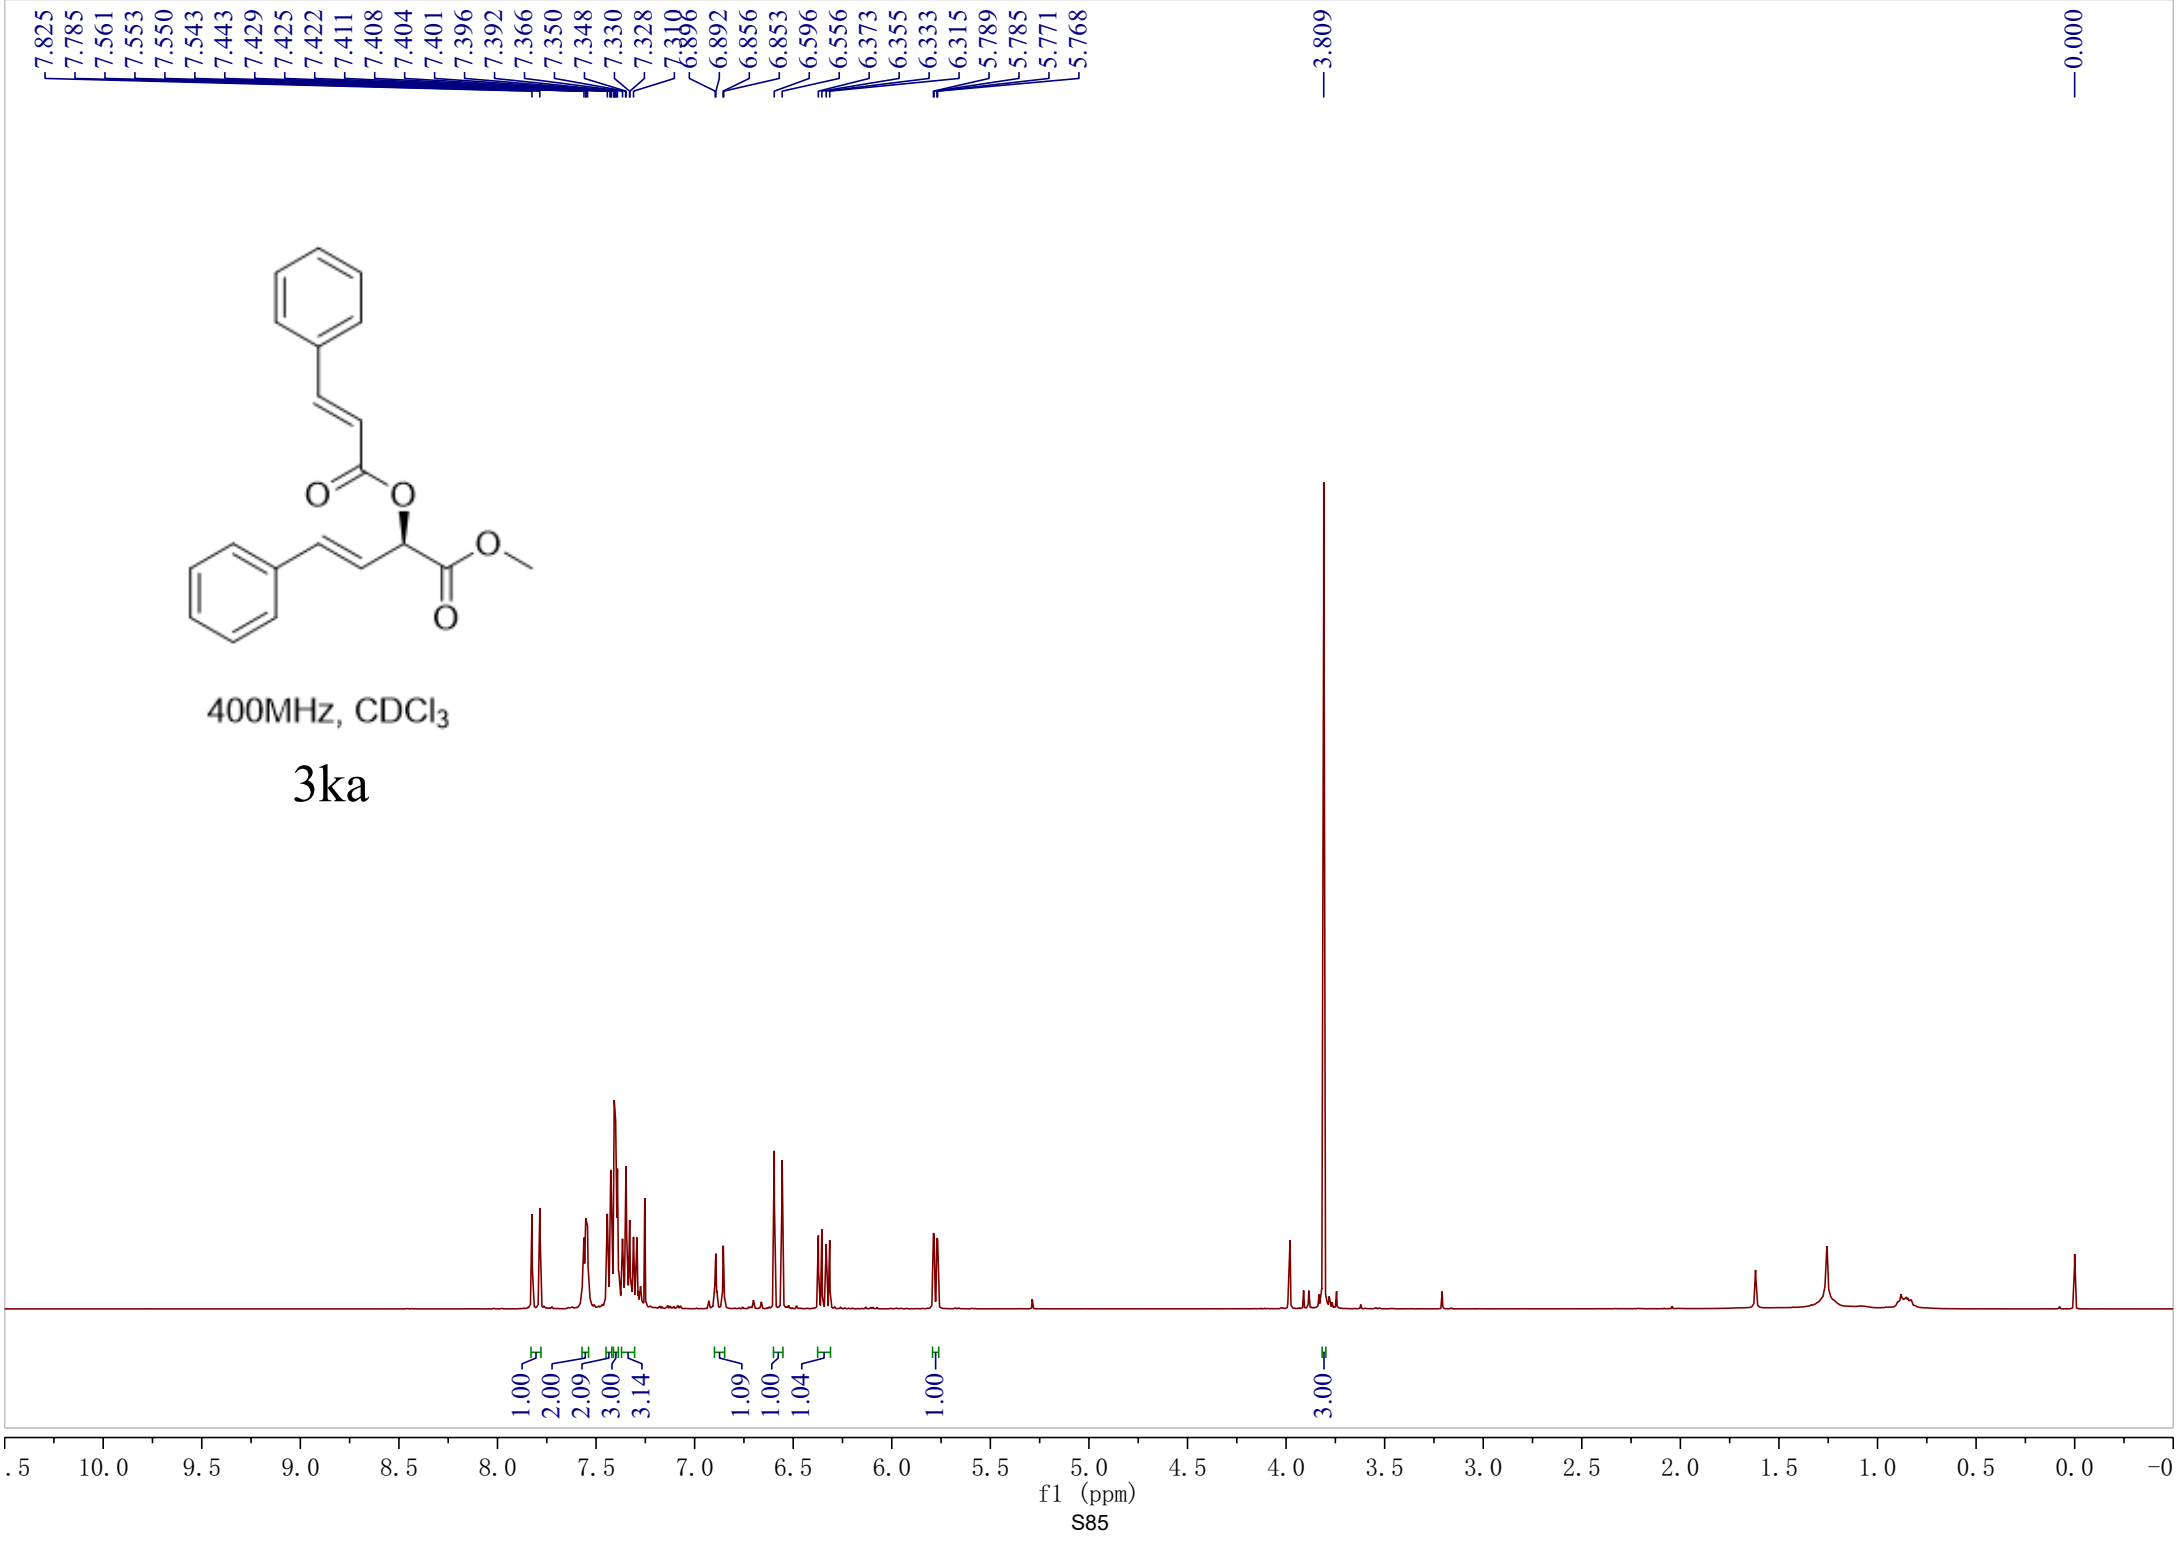

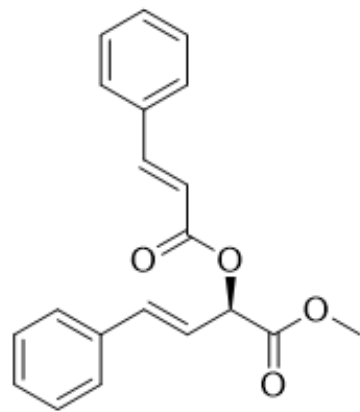

100MHz, CDCl<sub>3</sub>

3ka

—169.304  
—165.981

—146.431  
—135.573  
—135.449  
—134.174  
—130.670  
—128.978  
—128.731  
—128.639  
—128.316  
—126.895  
—120.896  
—116.887

—73.252

—52.780

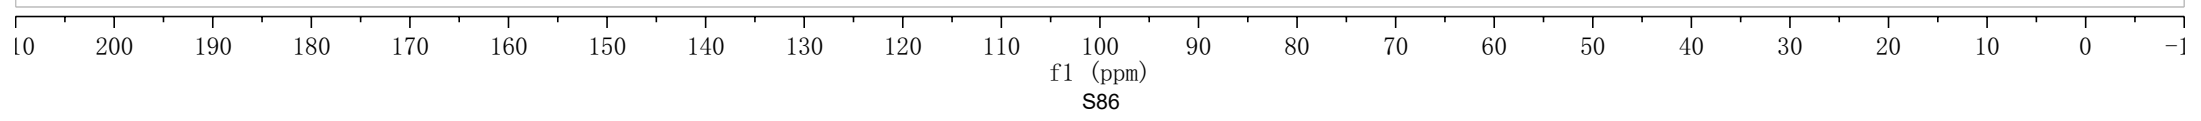



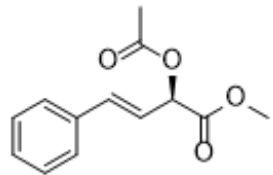

400MHz, CDCl<sub>3</sub>

31a

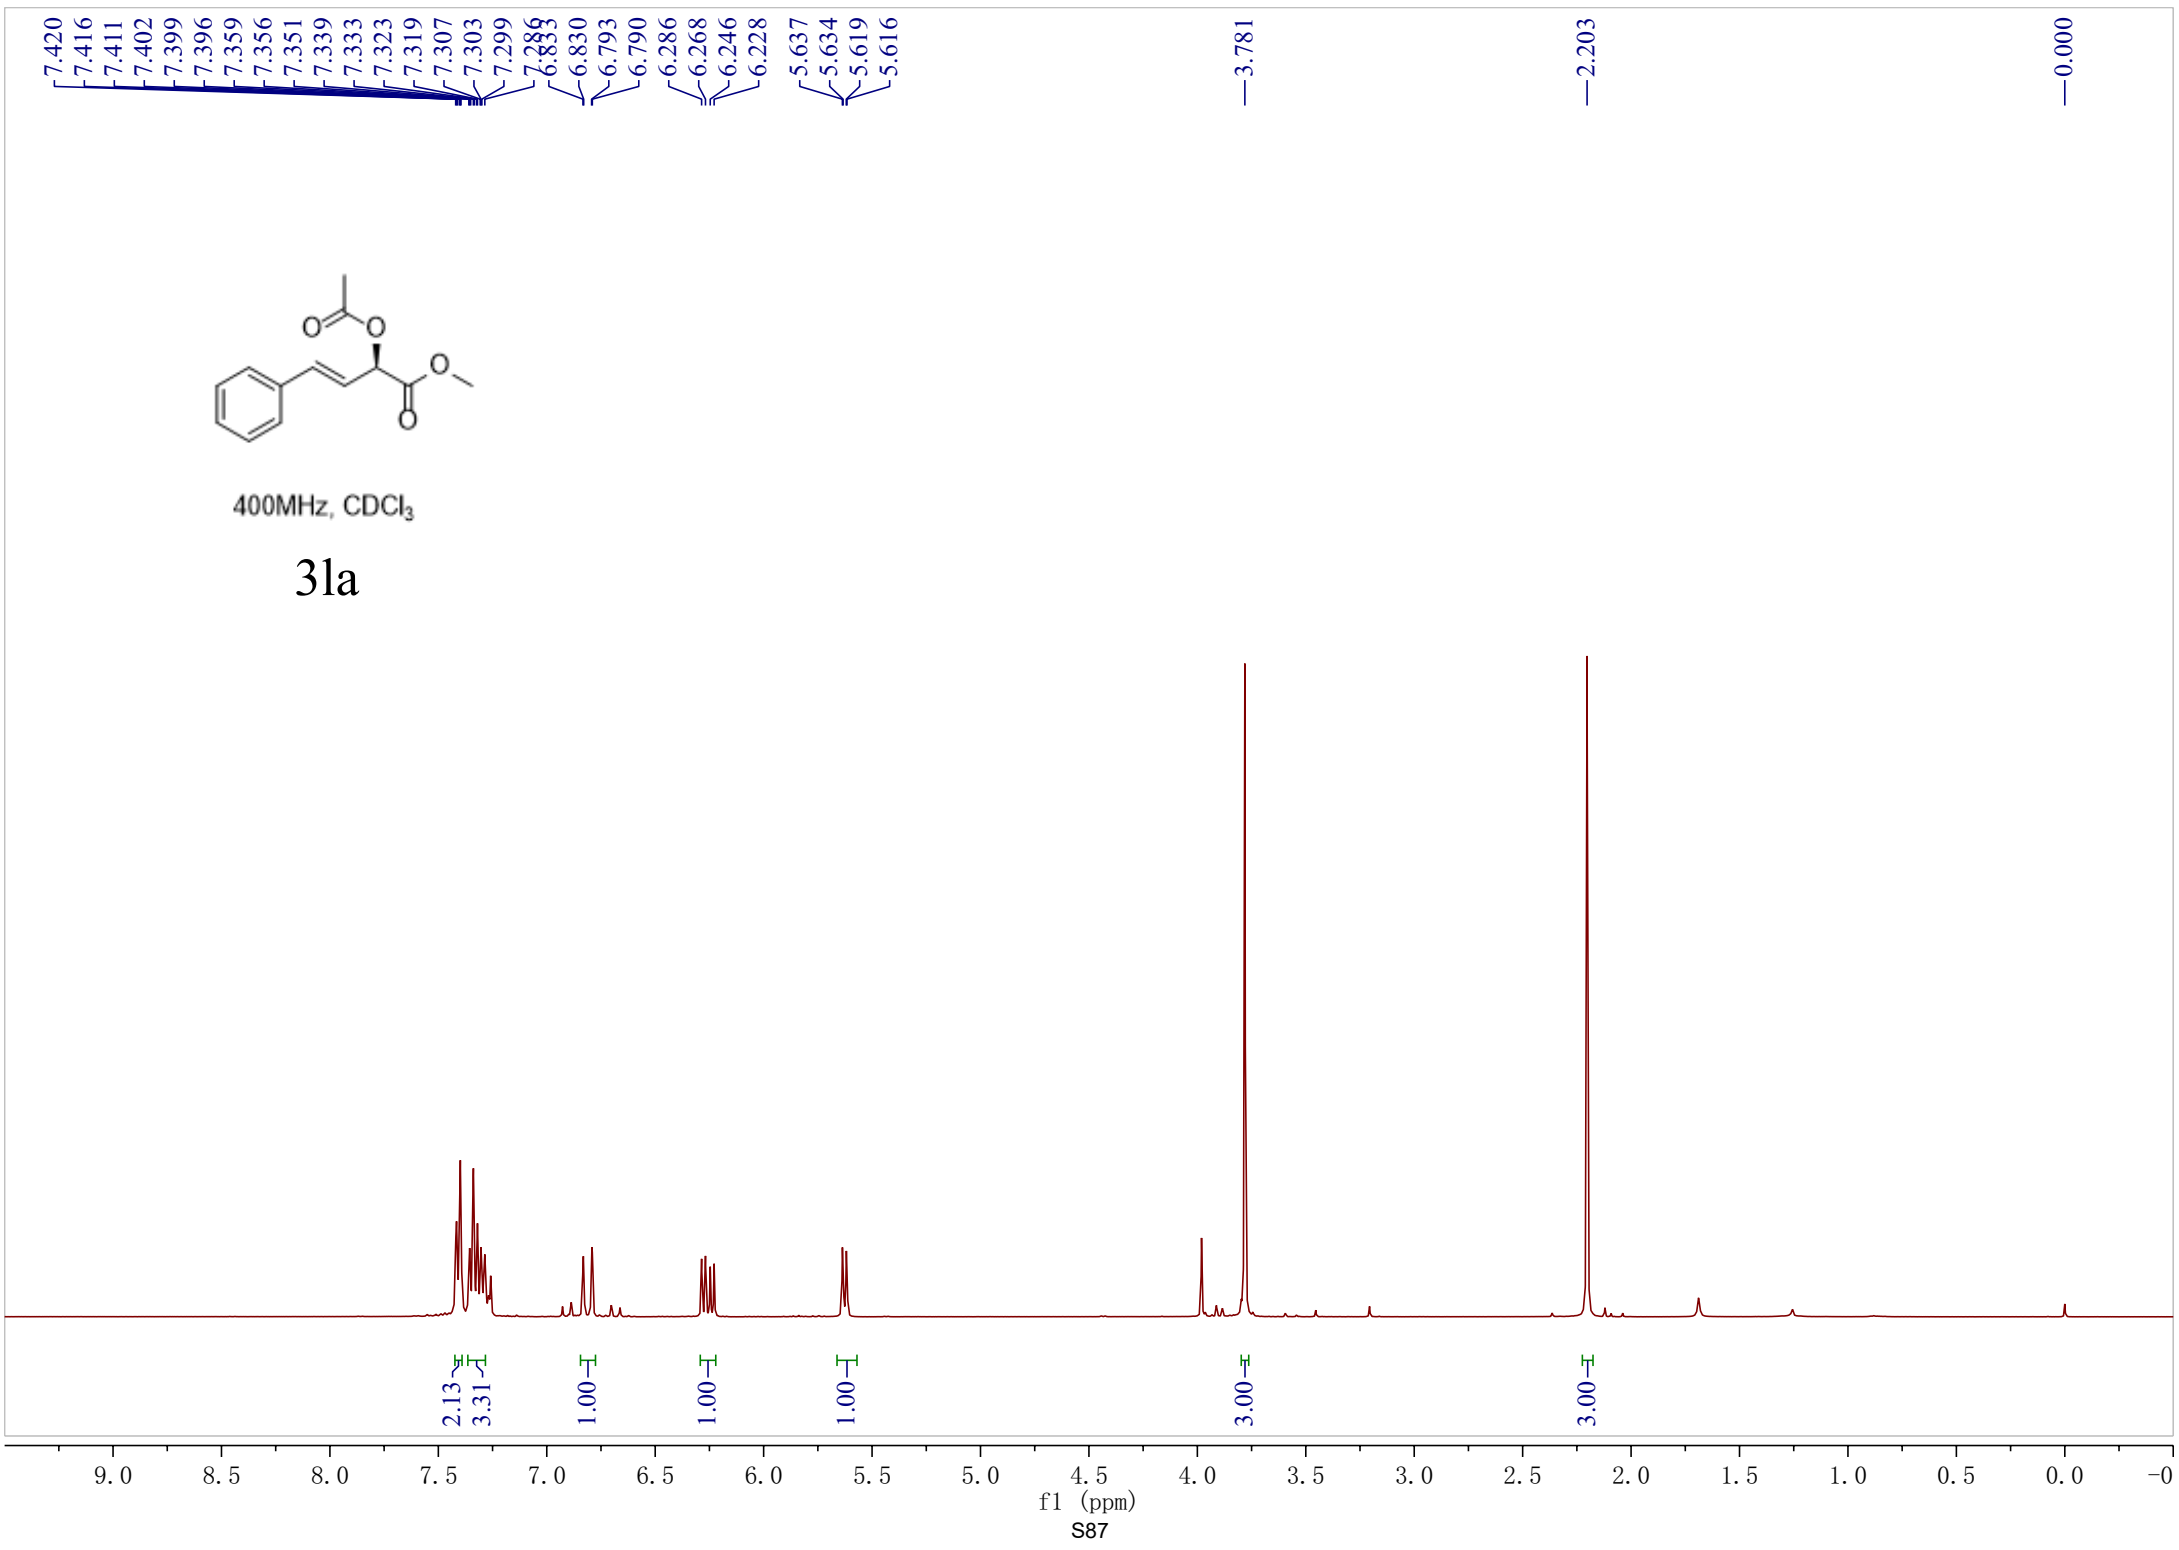

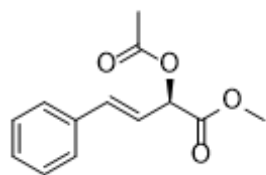

100MHz, CDCl<sub>3</sub>

3la

170.170  
169.226

135.516  
135.389  
128.733  
128.650  
126.863  
120.701

73.185

52.751

20.784

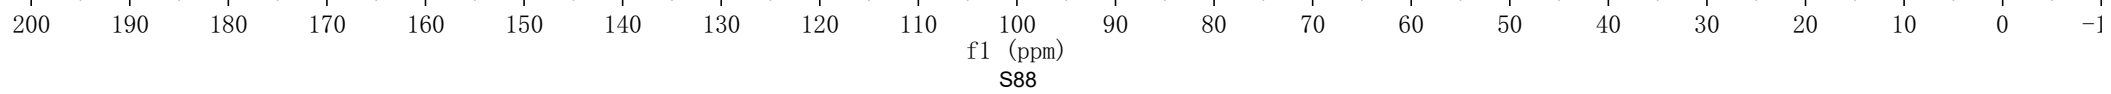

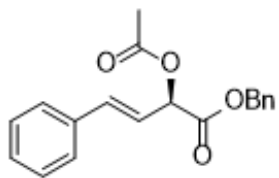

400MHz, CDCl<sub>3</sub>

3lc

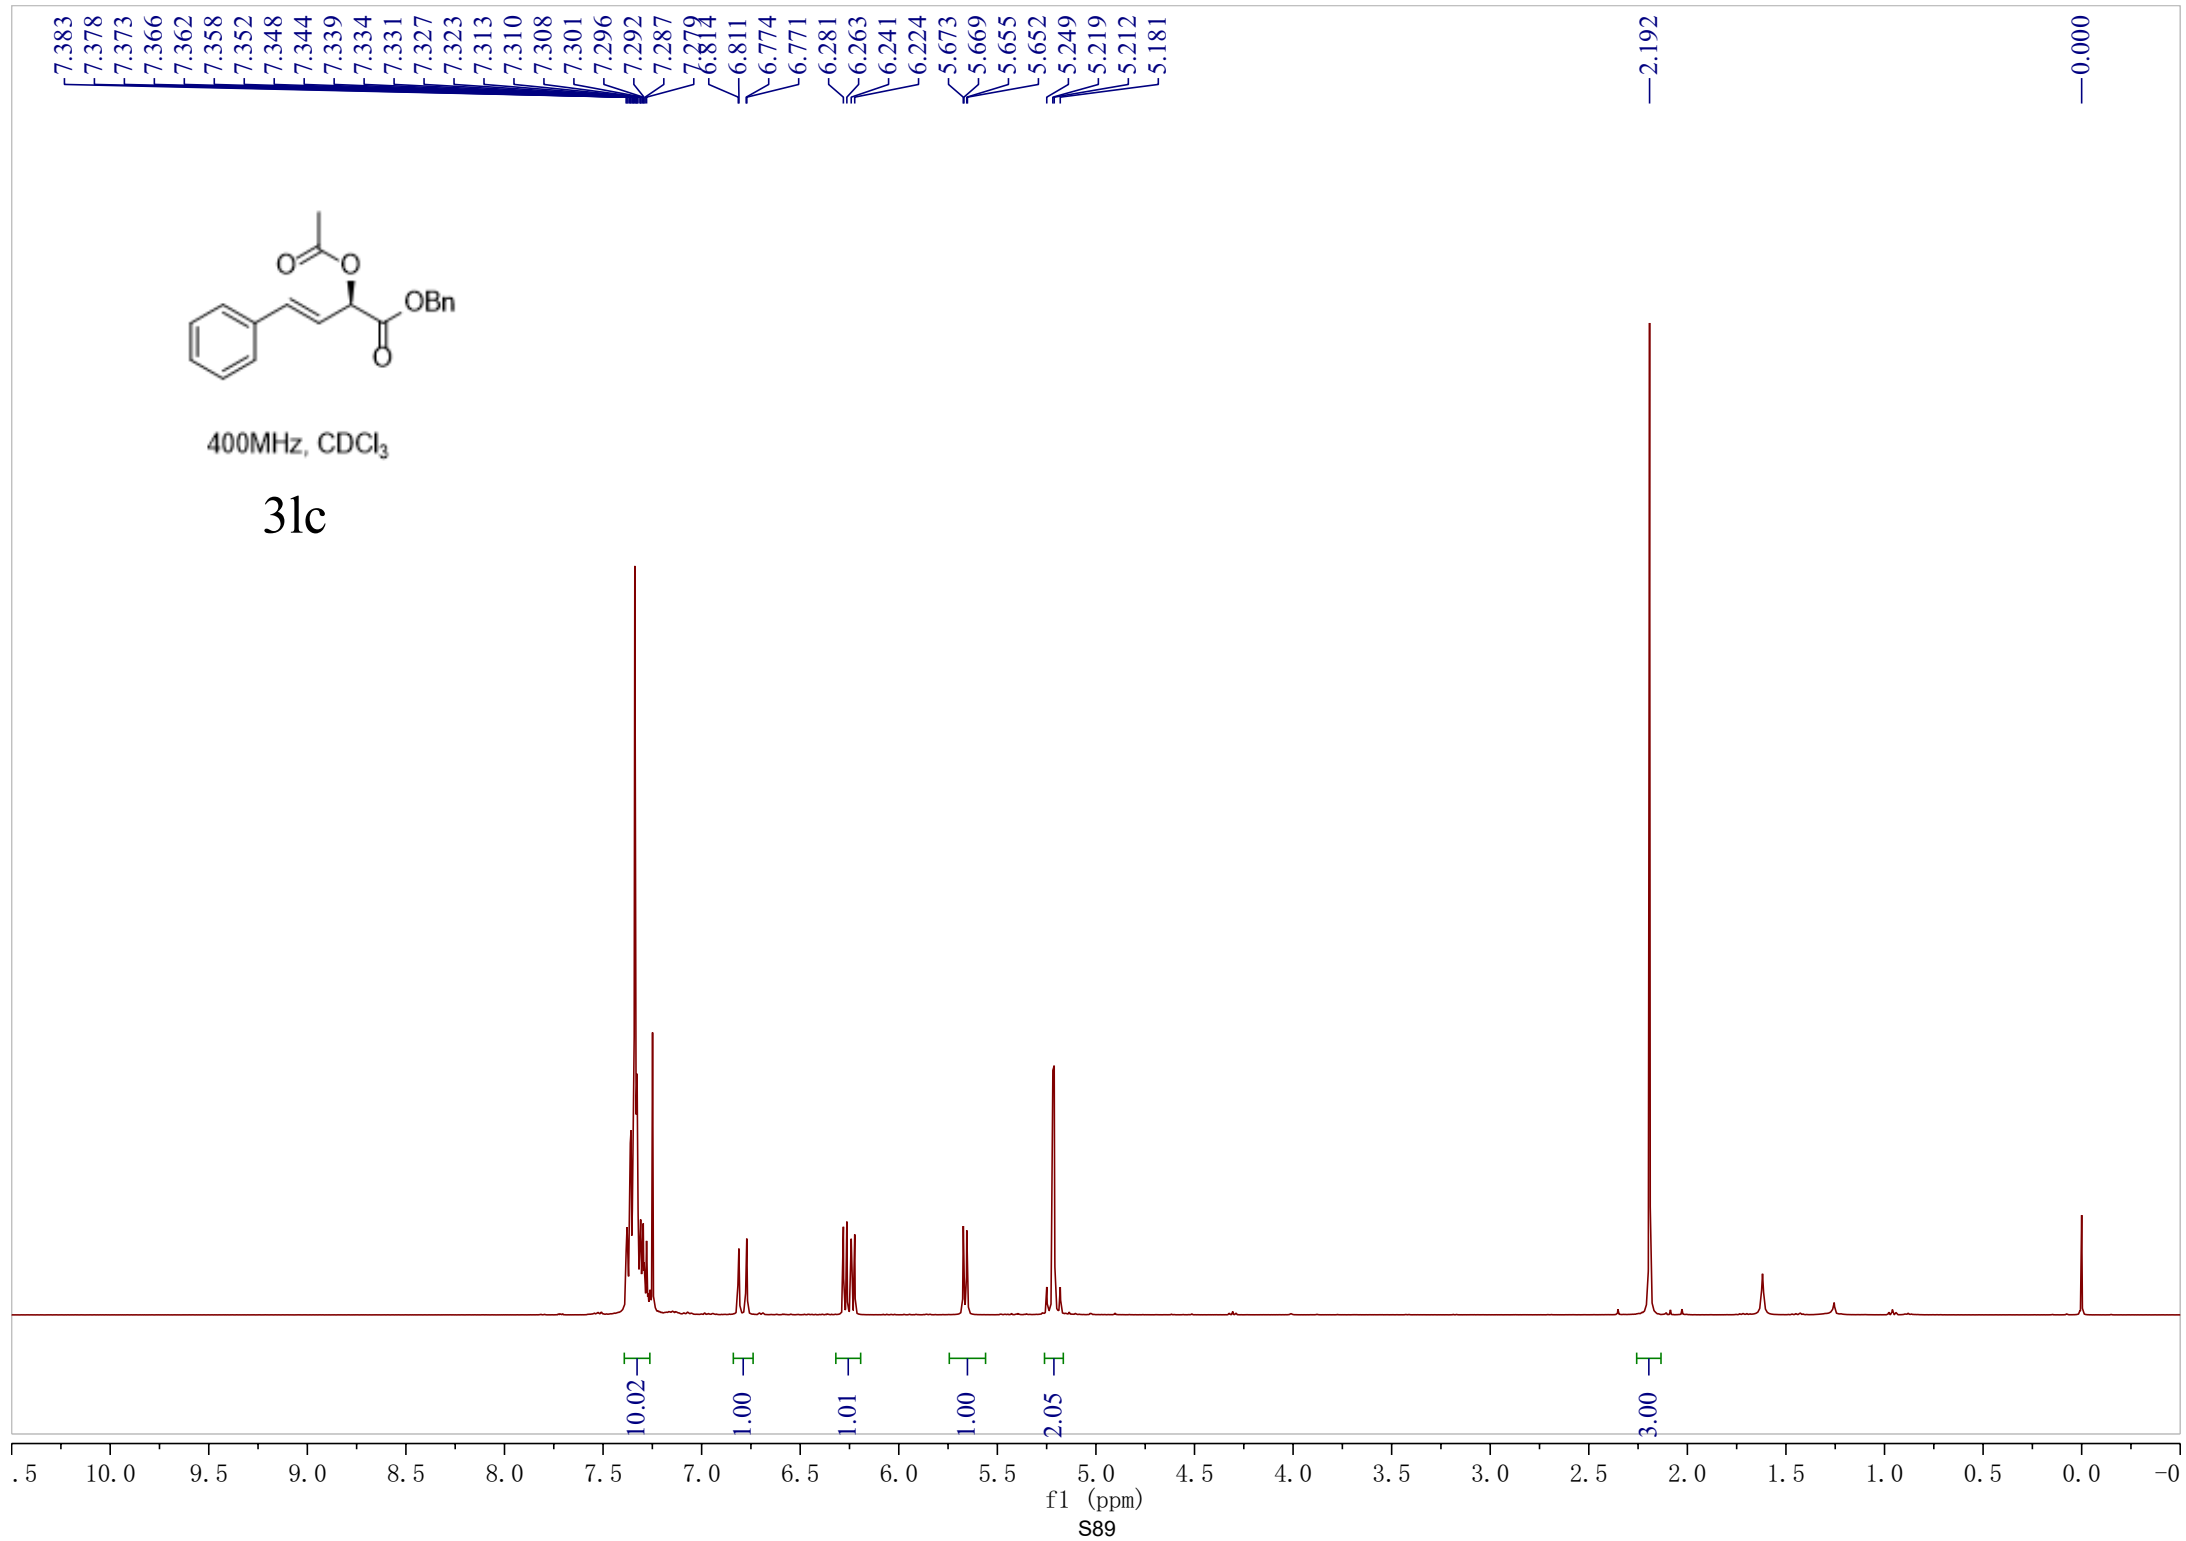

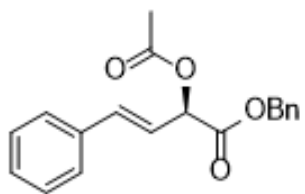

100MHz, CDCl<sub>3</sub>

3lc

~170.169  
~168.611

135.557  
135.436  
135.217  
128.702  
128.635  
128.608  
128.464  
128.172  
126.850  
120.651

73.217  
67.369

20.748

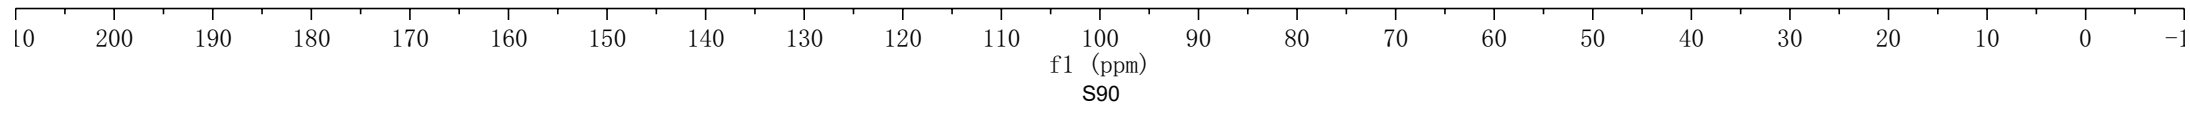

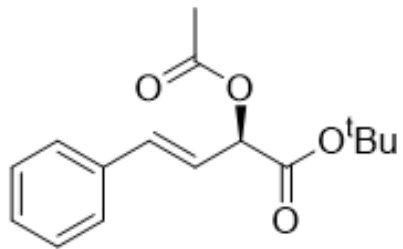

400MHz, CDCl<sub>3</sub>

31d

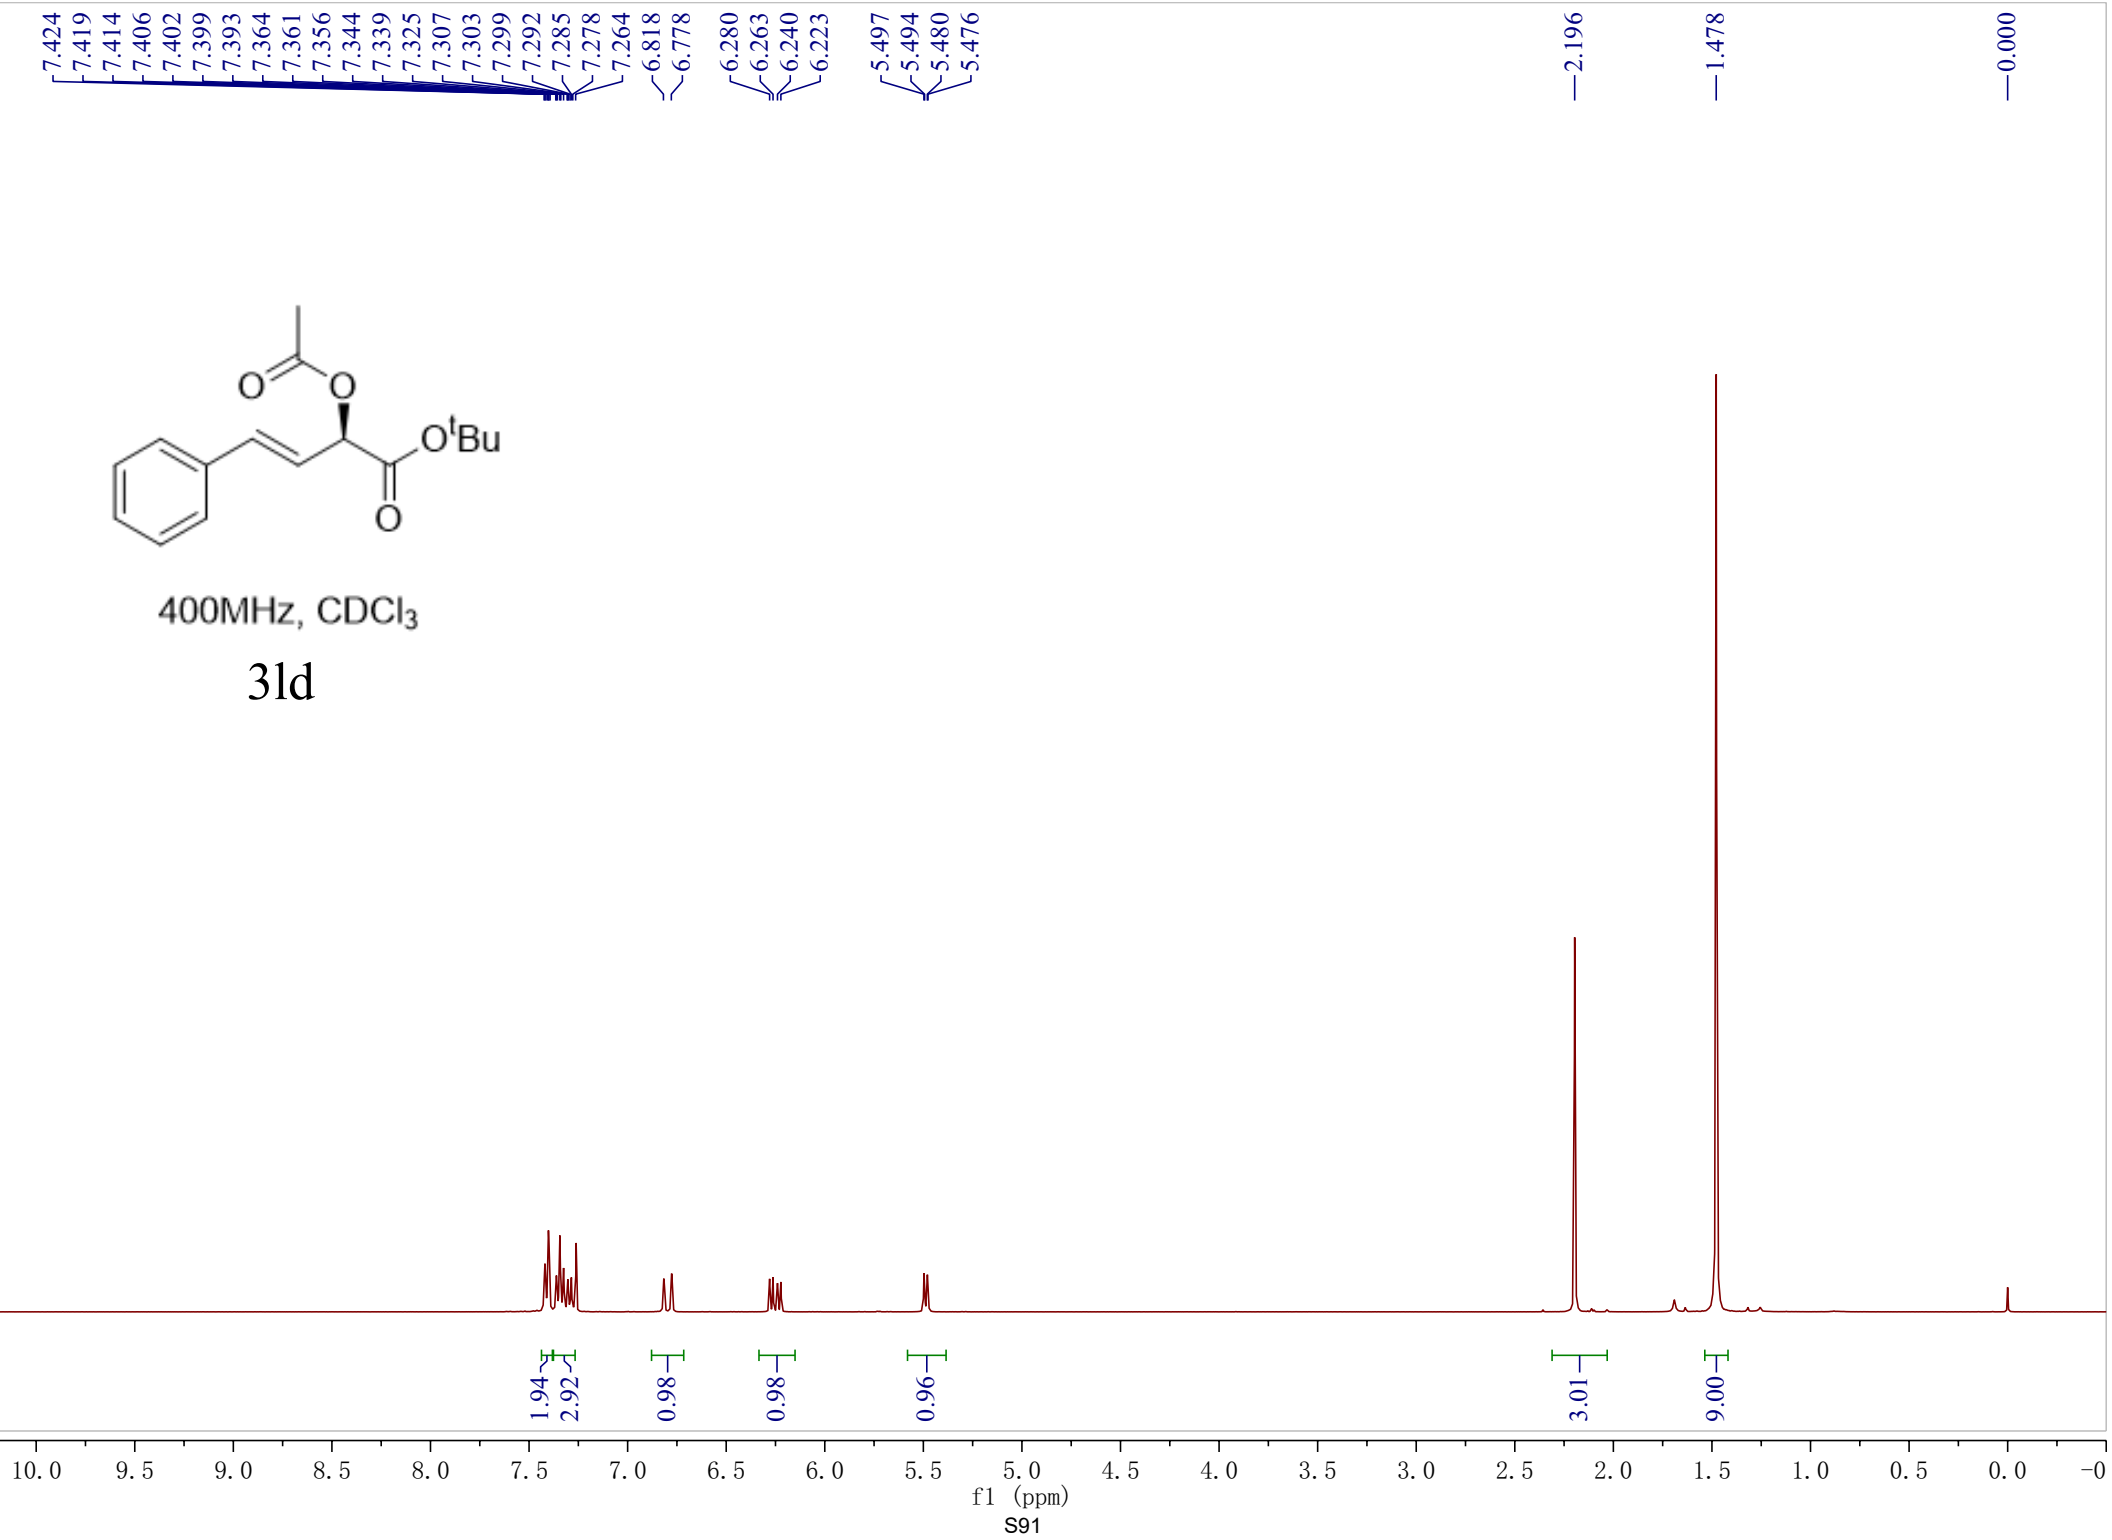

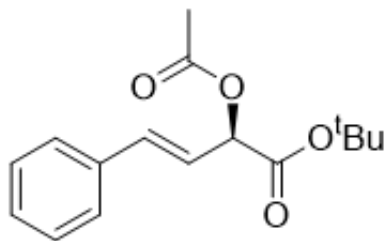

100MHz, CDCl<sub>3</sub>

31d

~170.213  
~167.777

~135.835  
~134.667  
~128.707  
~128.456  
~126.808  
~121.305

—82.755

—73.665

—27.984

—20.838

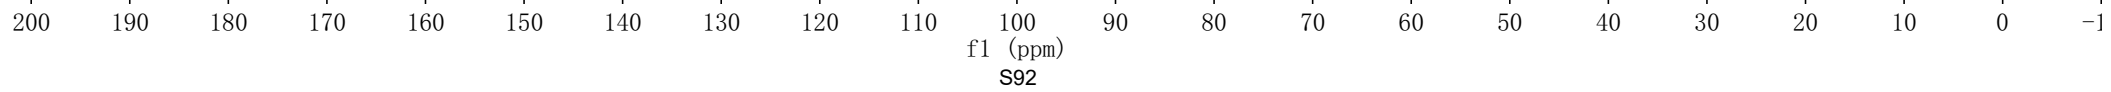

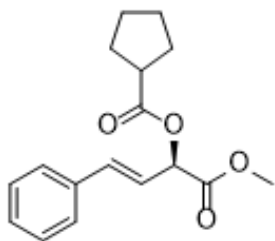

400MHz, CDCl<sub>3</sub>

3ma

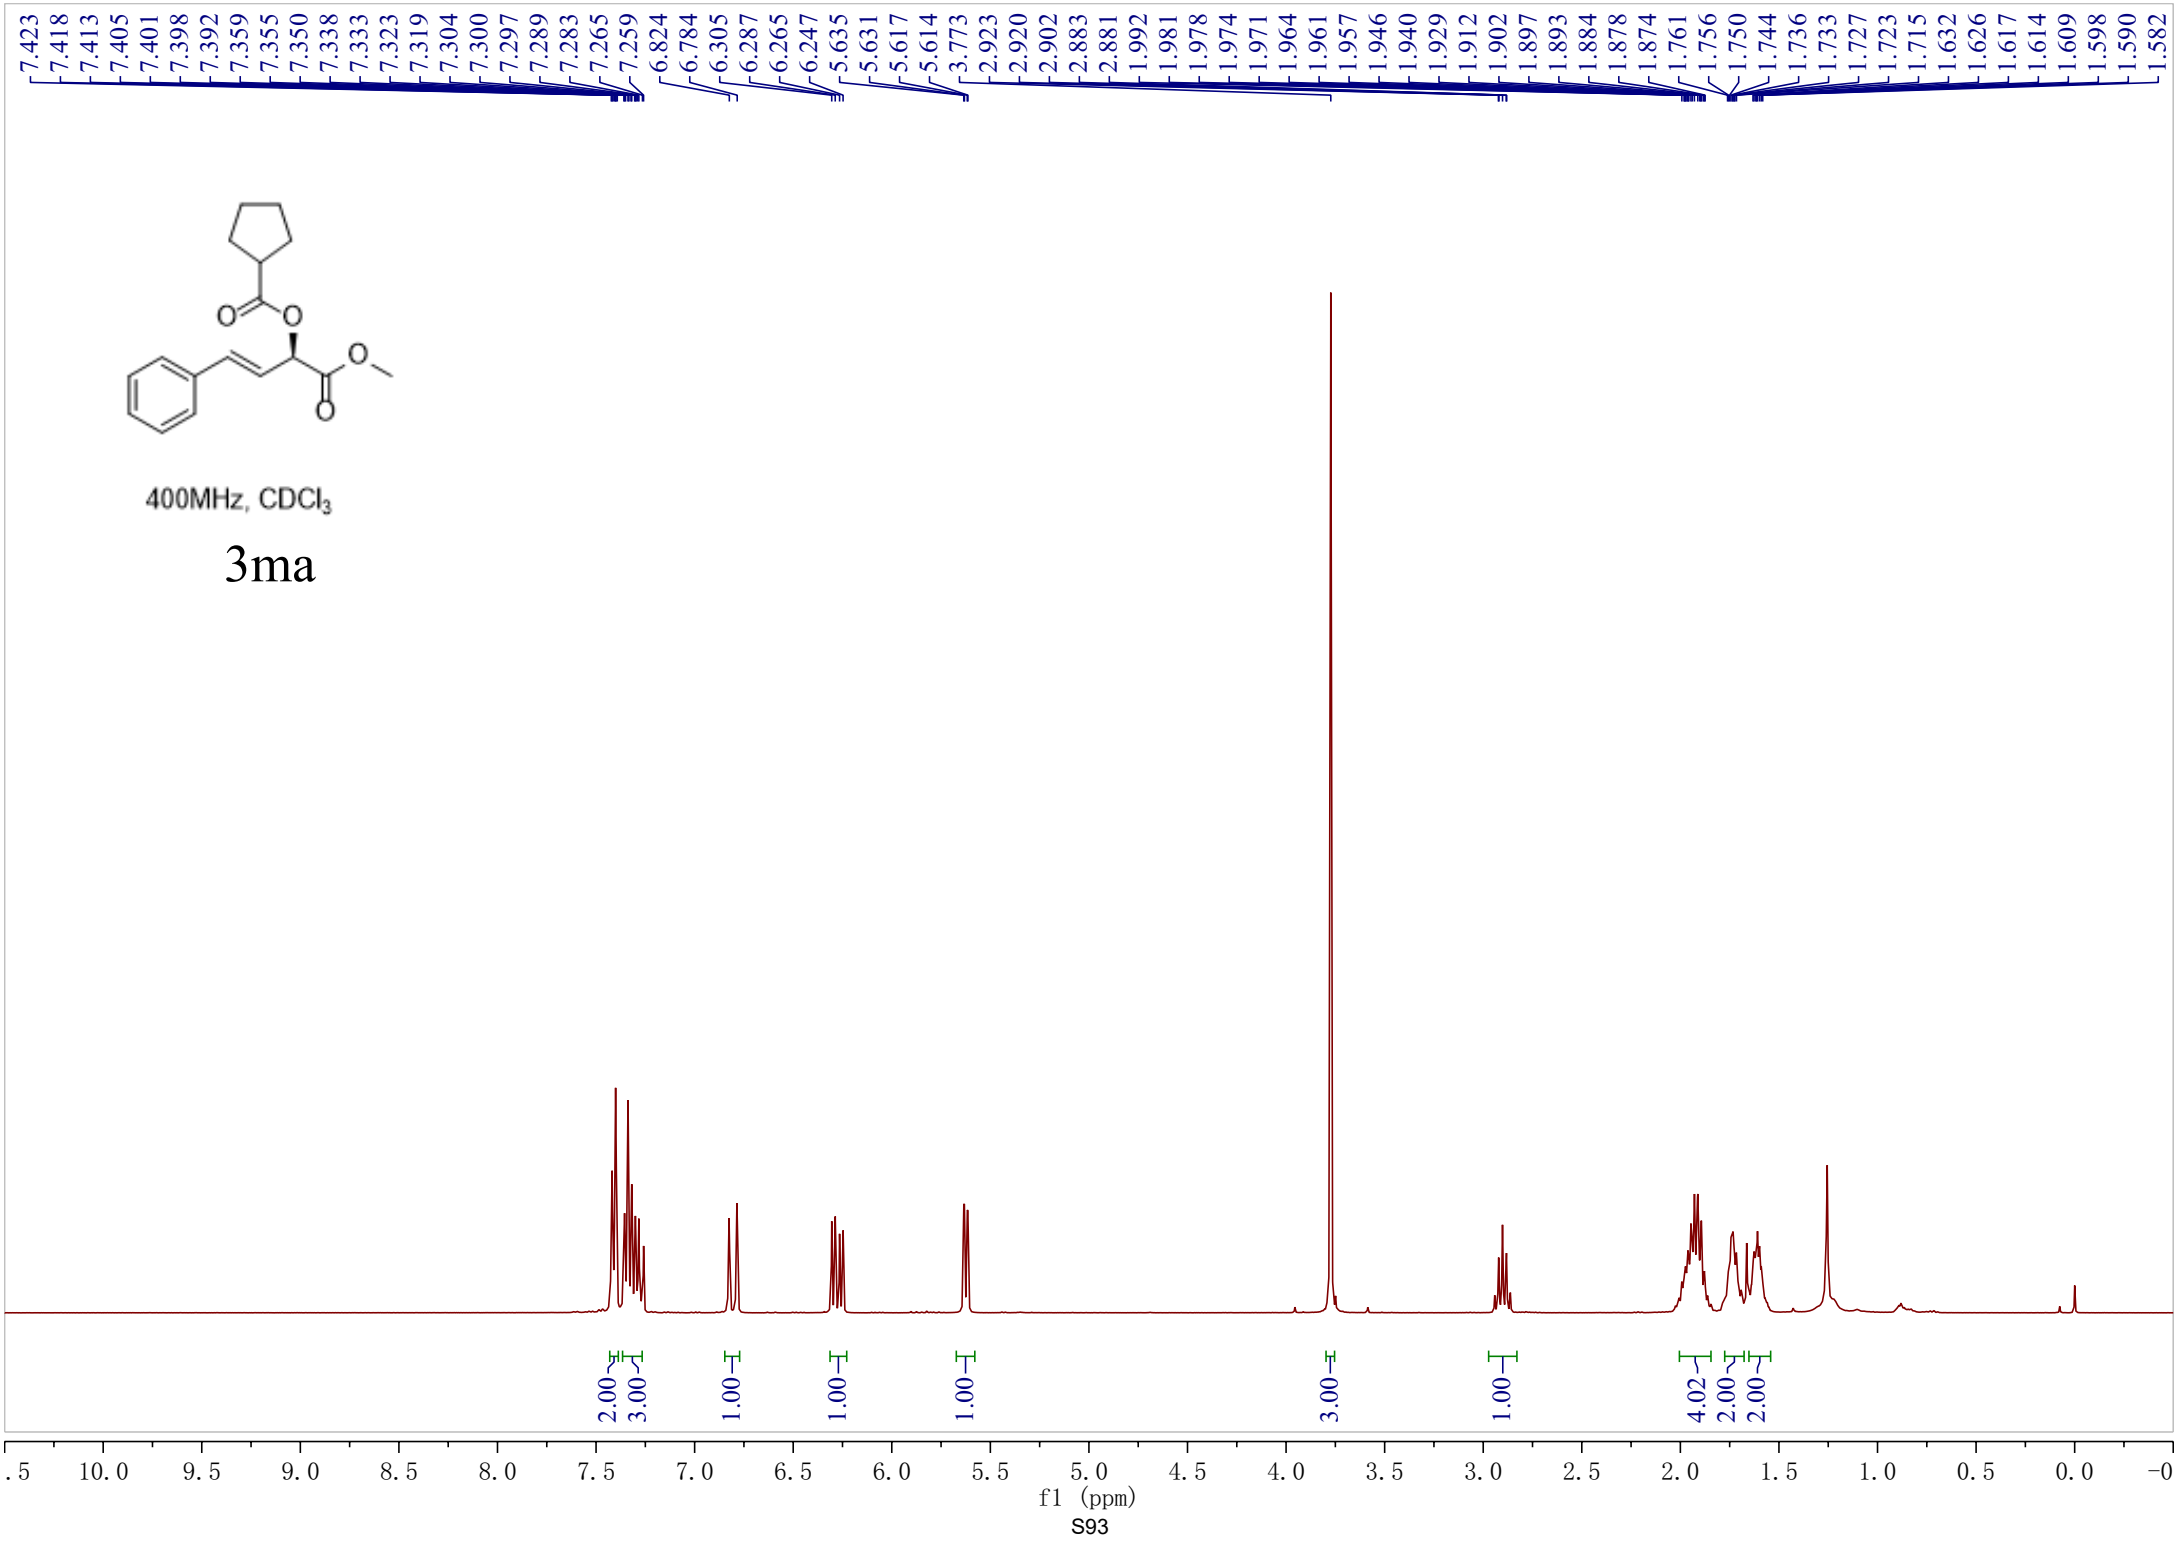

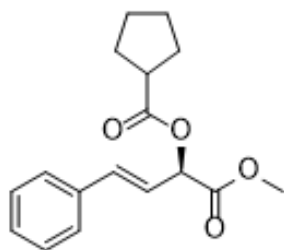

100MHz, CDCl<sub>3</sub>

3ma

—175.961

—169.369

—135.615

—135.100

—128.714

—128.576

—126.855

—120.983

—72.922

—52.672

—43.463

—30.091

—29.829

—25.911

—25.891

200 190 180 170 160 150 140 130 120 110 100 90 80 70 60 50 40 30 20 10 0 -1

f1 (ppm)

S94



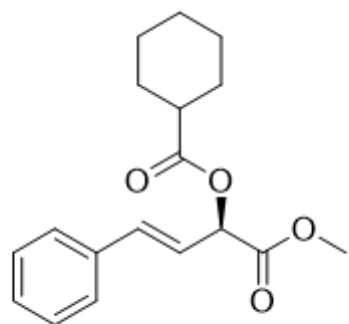

400MHz, CDCl<sub>3</sub>

3na

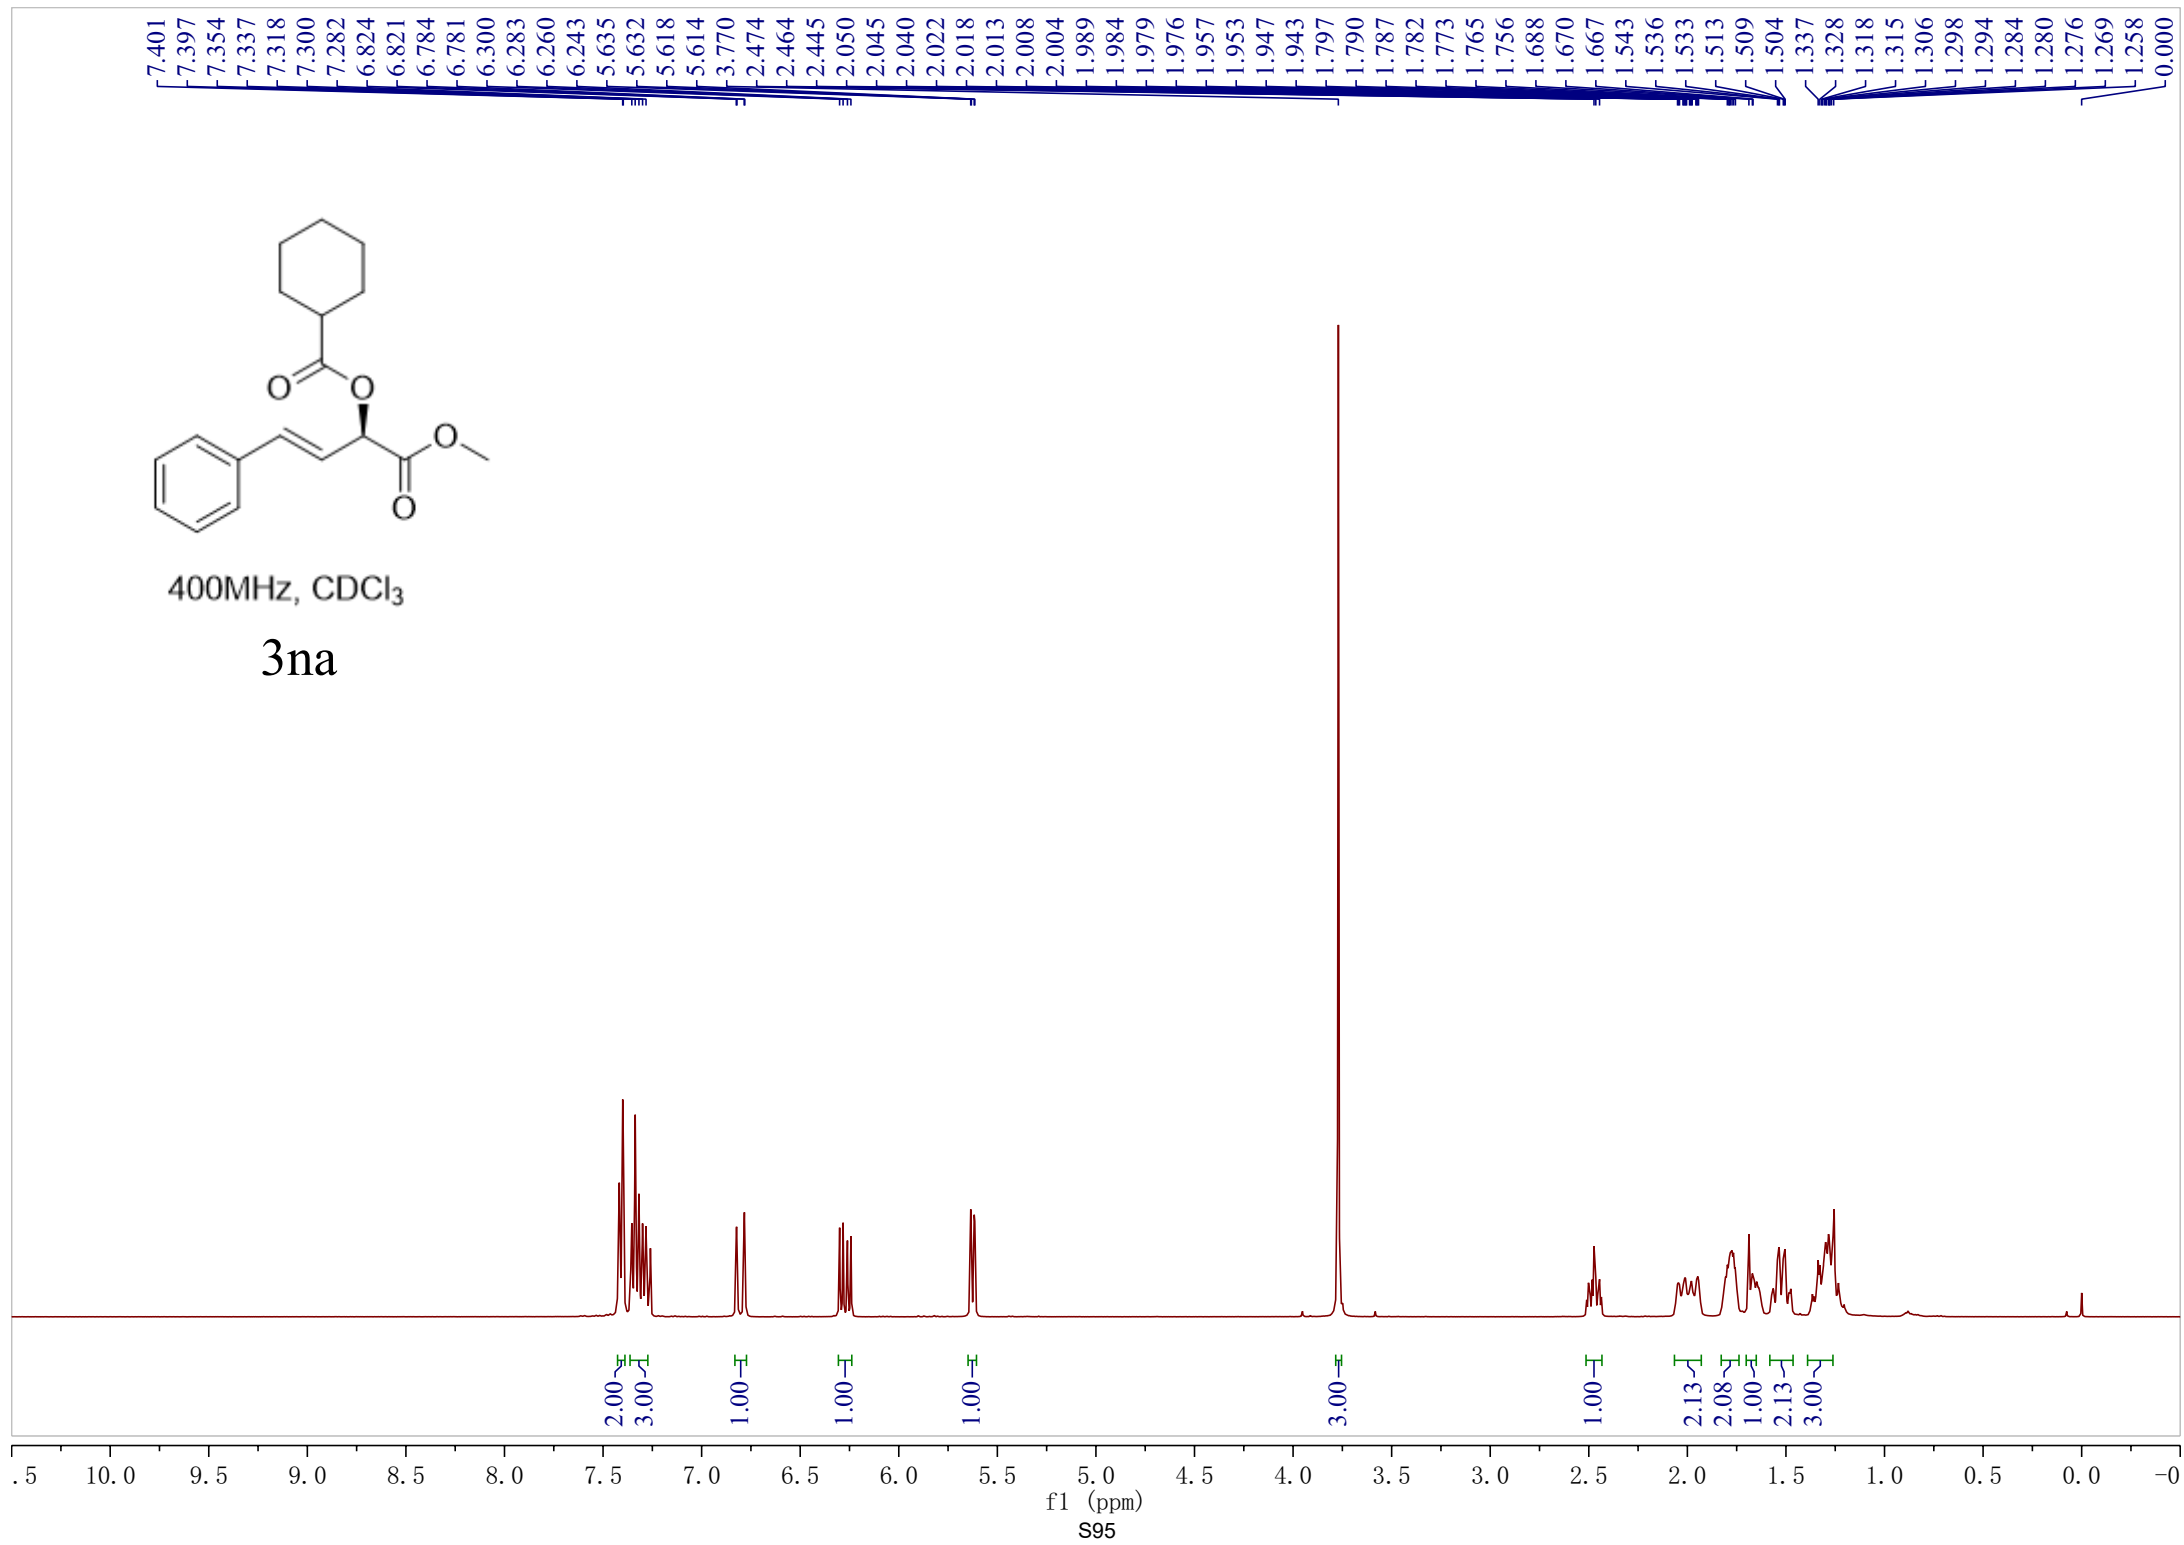

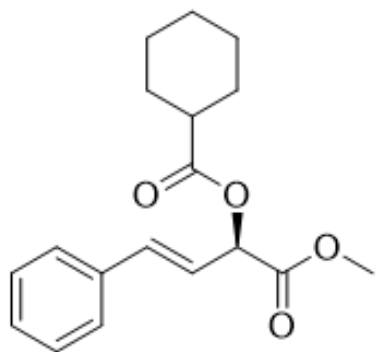

100MHz, CDCl<sub>3</sub>

3na

—175.210

—169.343

↙135.613

↘135.064

↙128.711

↘128.572

↙126.852

↘120.971

—72.746

—52.674

—42.871

↙28.959

↘28.838

↙25.740

↘25.372

↙25.336

210 200 190 180 170 160 150 140 130 120 110 100 90 80 70 60 50 40 30 20 10 0 -10

f1 (ppm)

S96

1.00

2.90

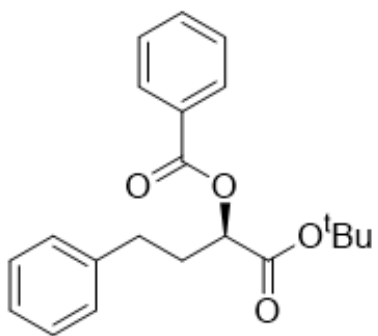

400MHz, CDCl<sub>3</sub>

4ad

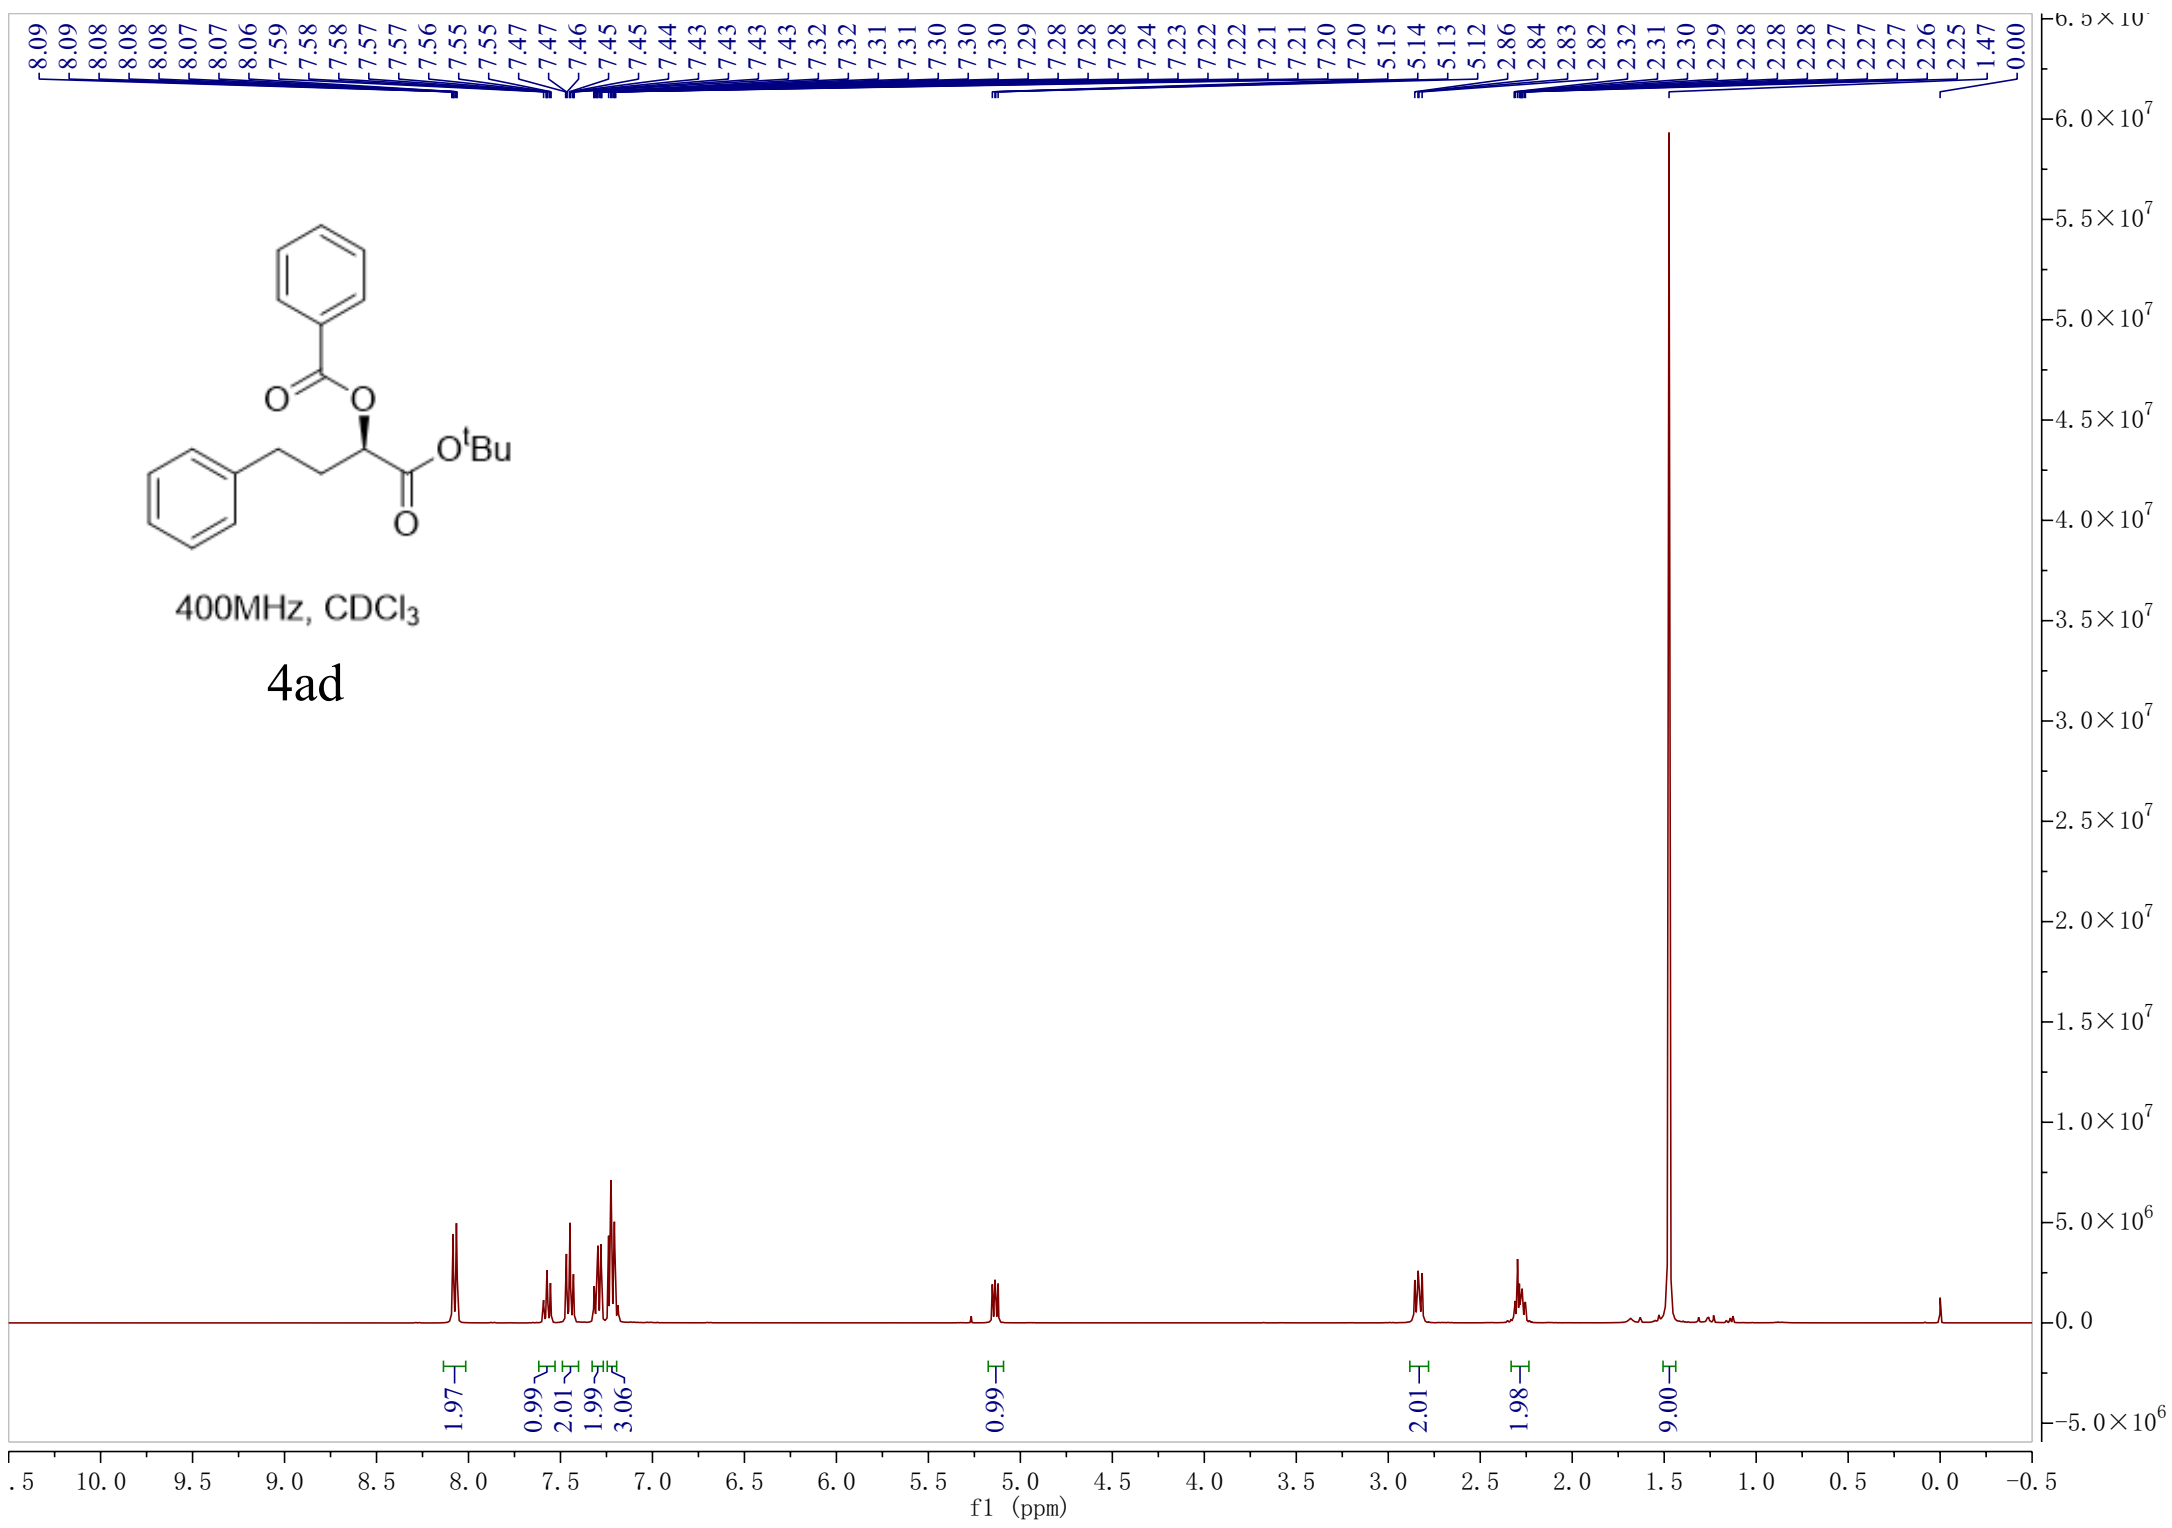

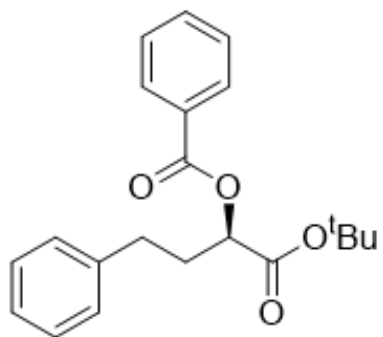

100MHz, CDCl<sub>3</sub>

4ad

169.21  
166.07

140.78  
133.27  
129.86  
129.69  
128.62  
128.48  
128.44  
126.26

82.28

72.69

33.04  
31.61  
28.04

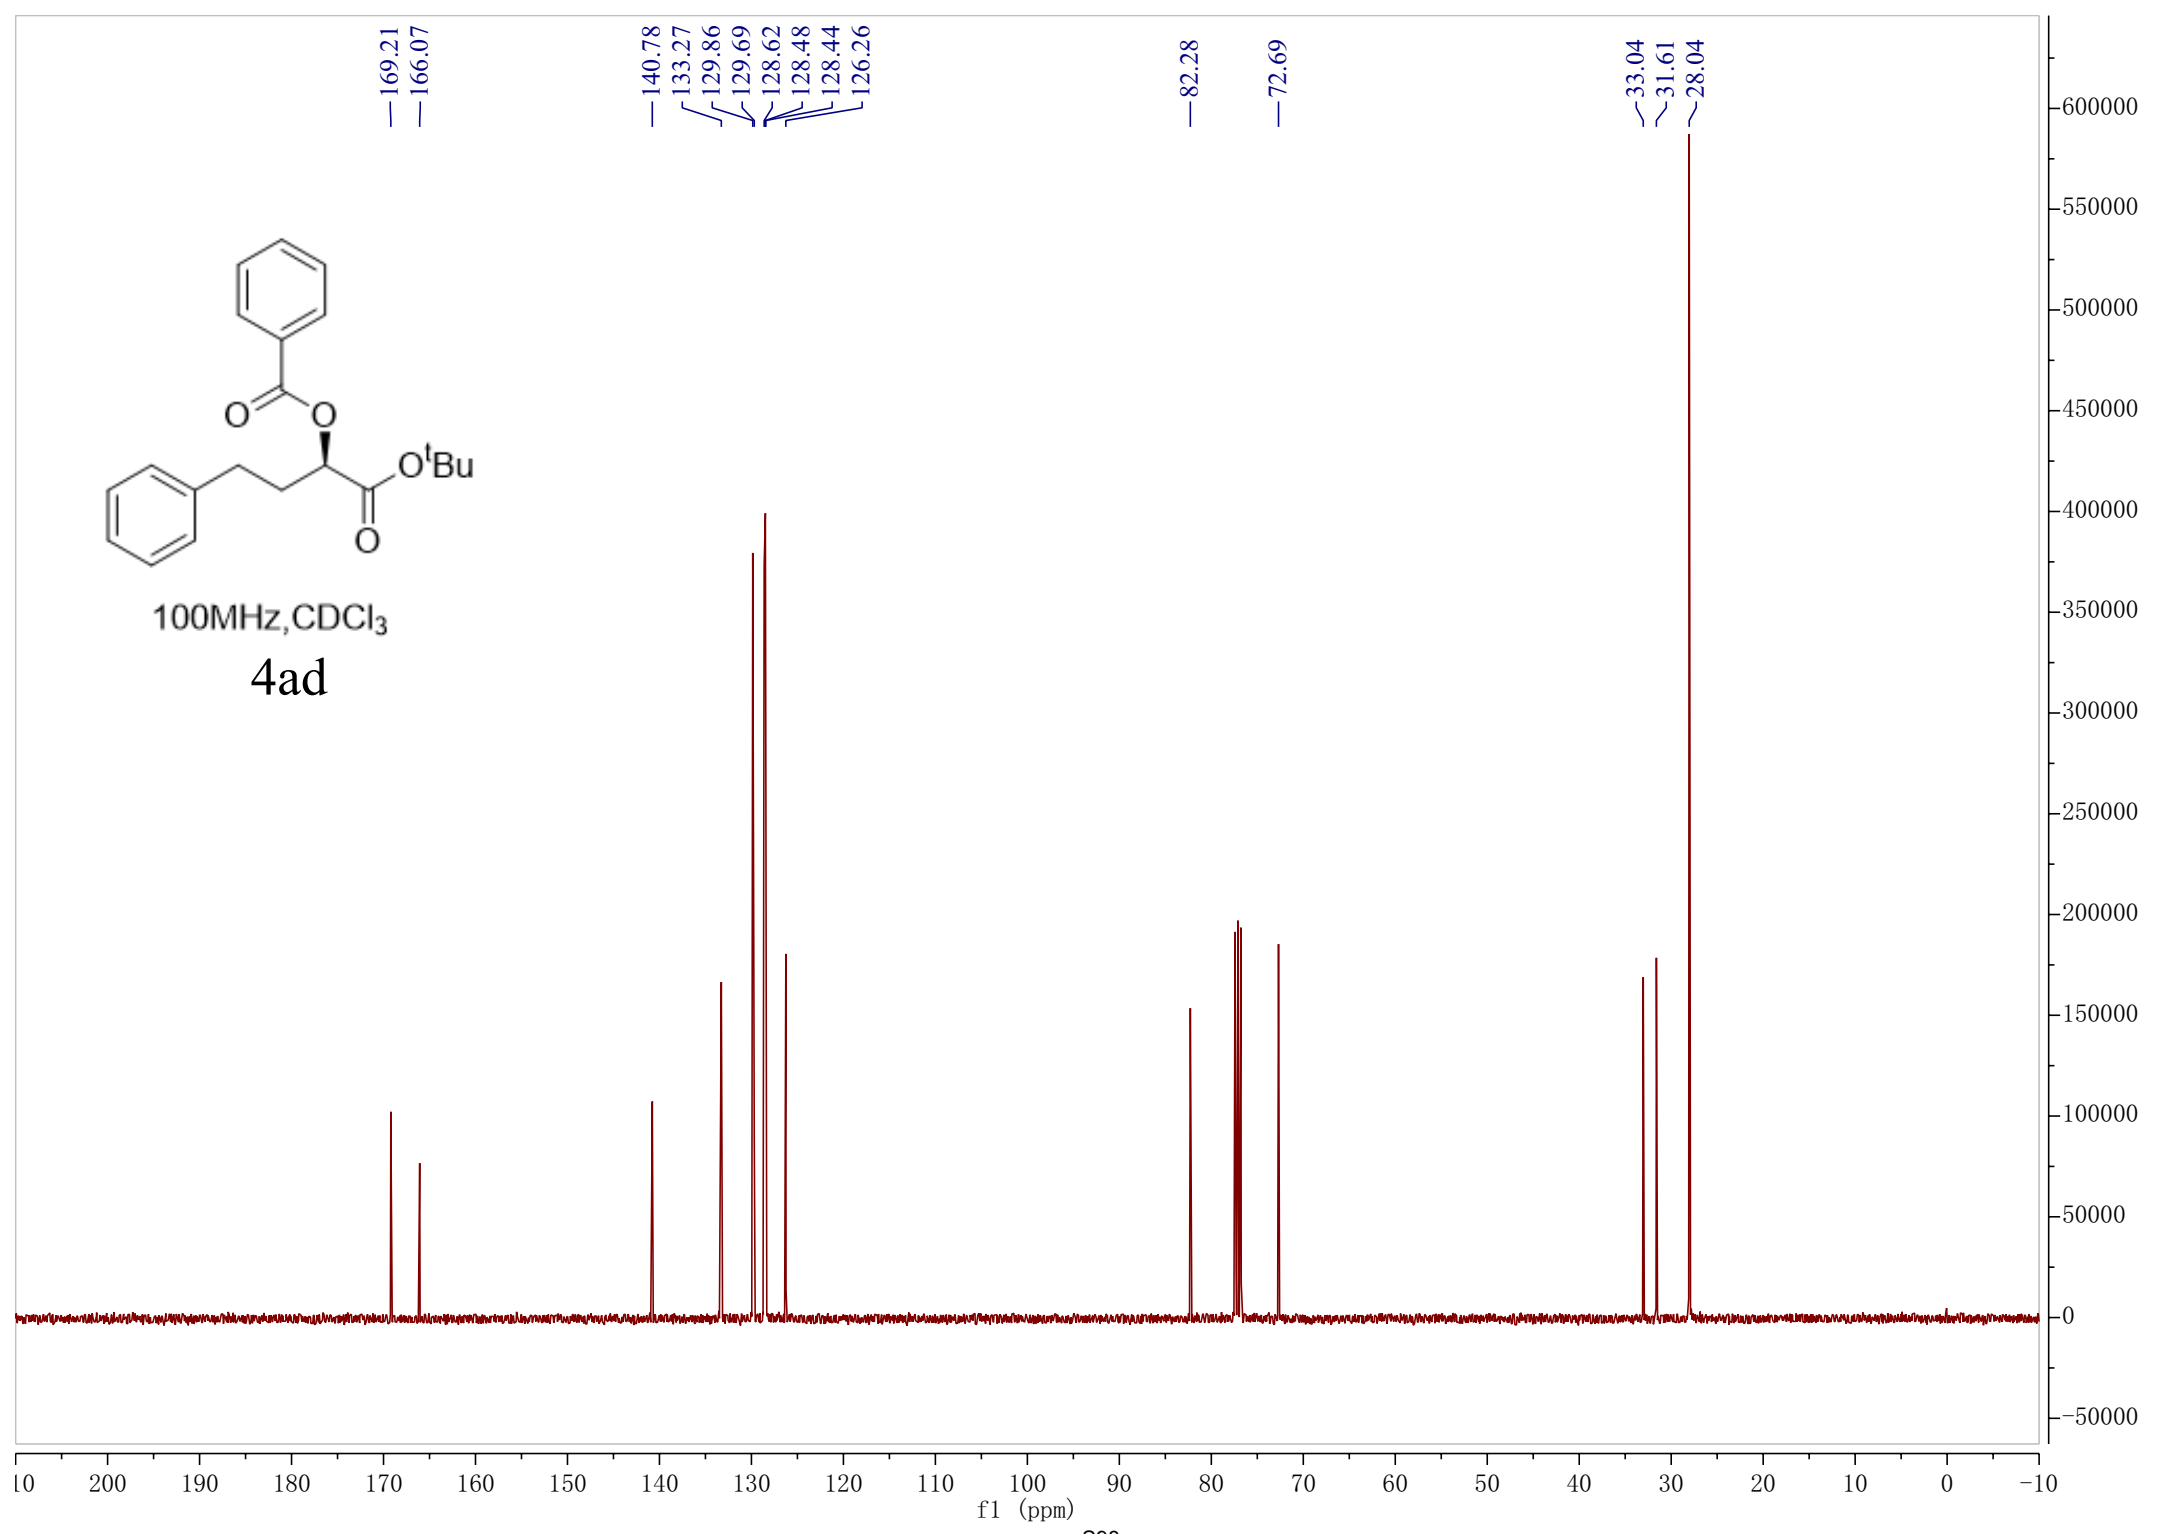

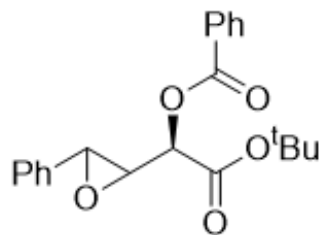

400MHz, CDCl<sub>3</sub>  
dr= 1.8/1

5ad

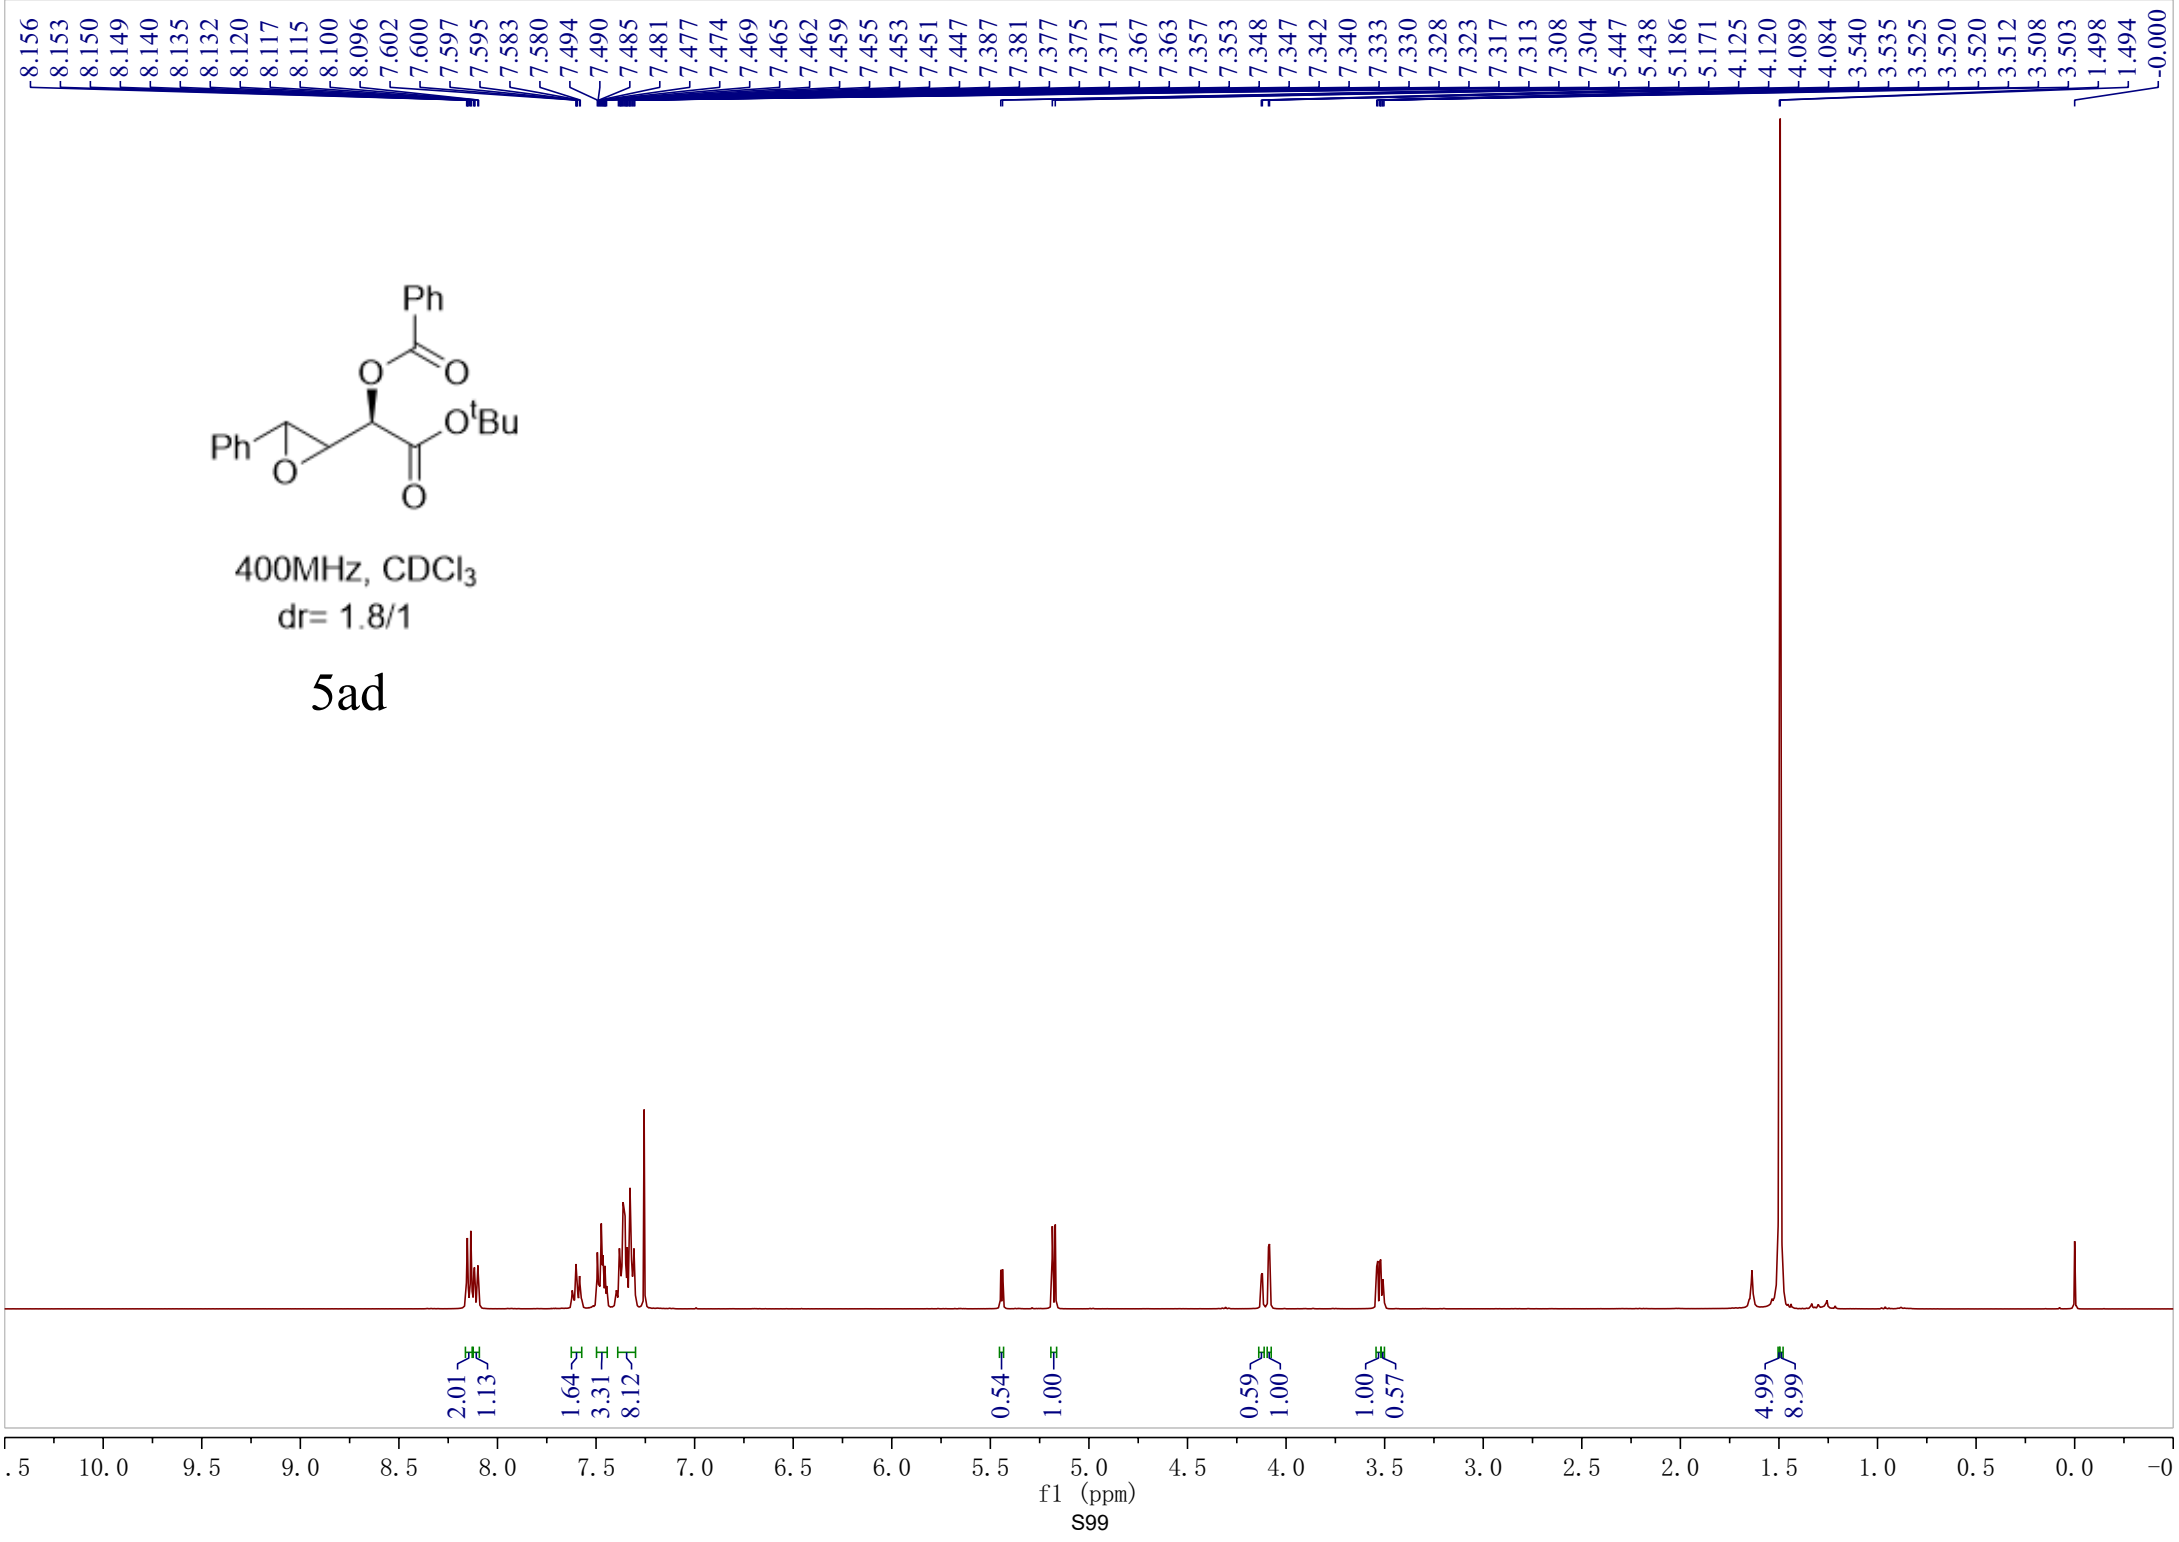

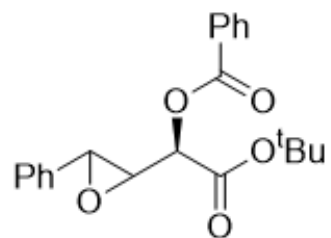

100MHz, CDCl<sub>3</sub>

dr= 1.8/1

5ad

166.033  
165.903  
165.653  
165.508

135.928  
135.745  
133.564  
130.049  
129.976  
129.140  
129.122  
128.678  
128.627  
128.608  
128.518  
128.505  
125.778  
125.688

83.506  
83.417

73.590  
71.495

60.250  
59.706  
56.312  
55.611

28.057  
28.035

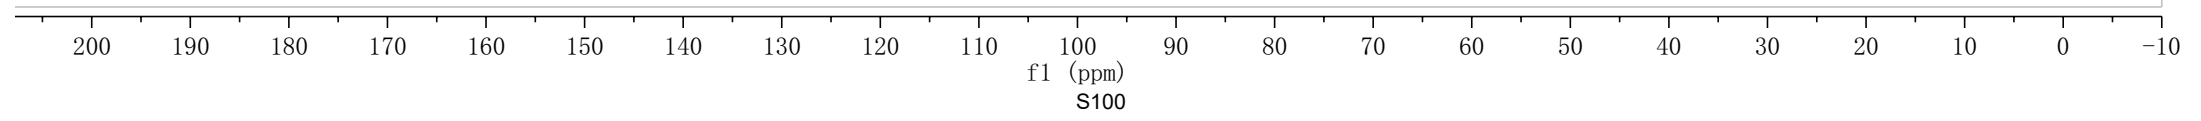

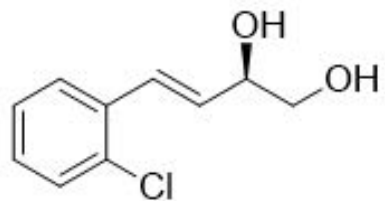

400MHz, CDCl<sub>3</sub>

6ak

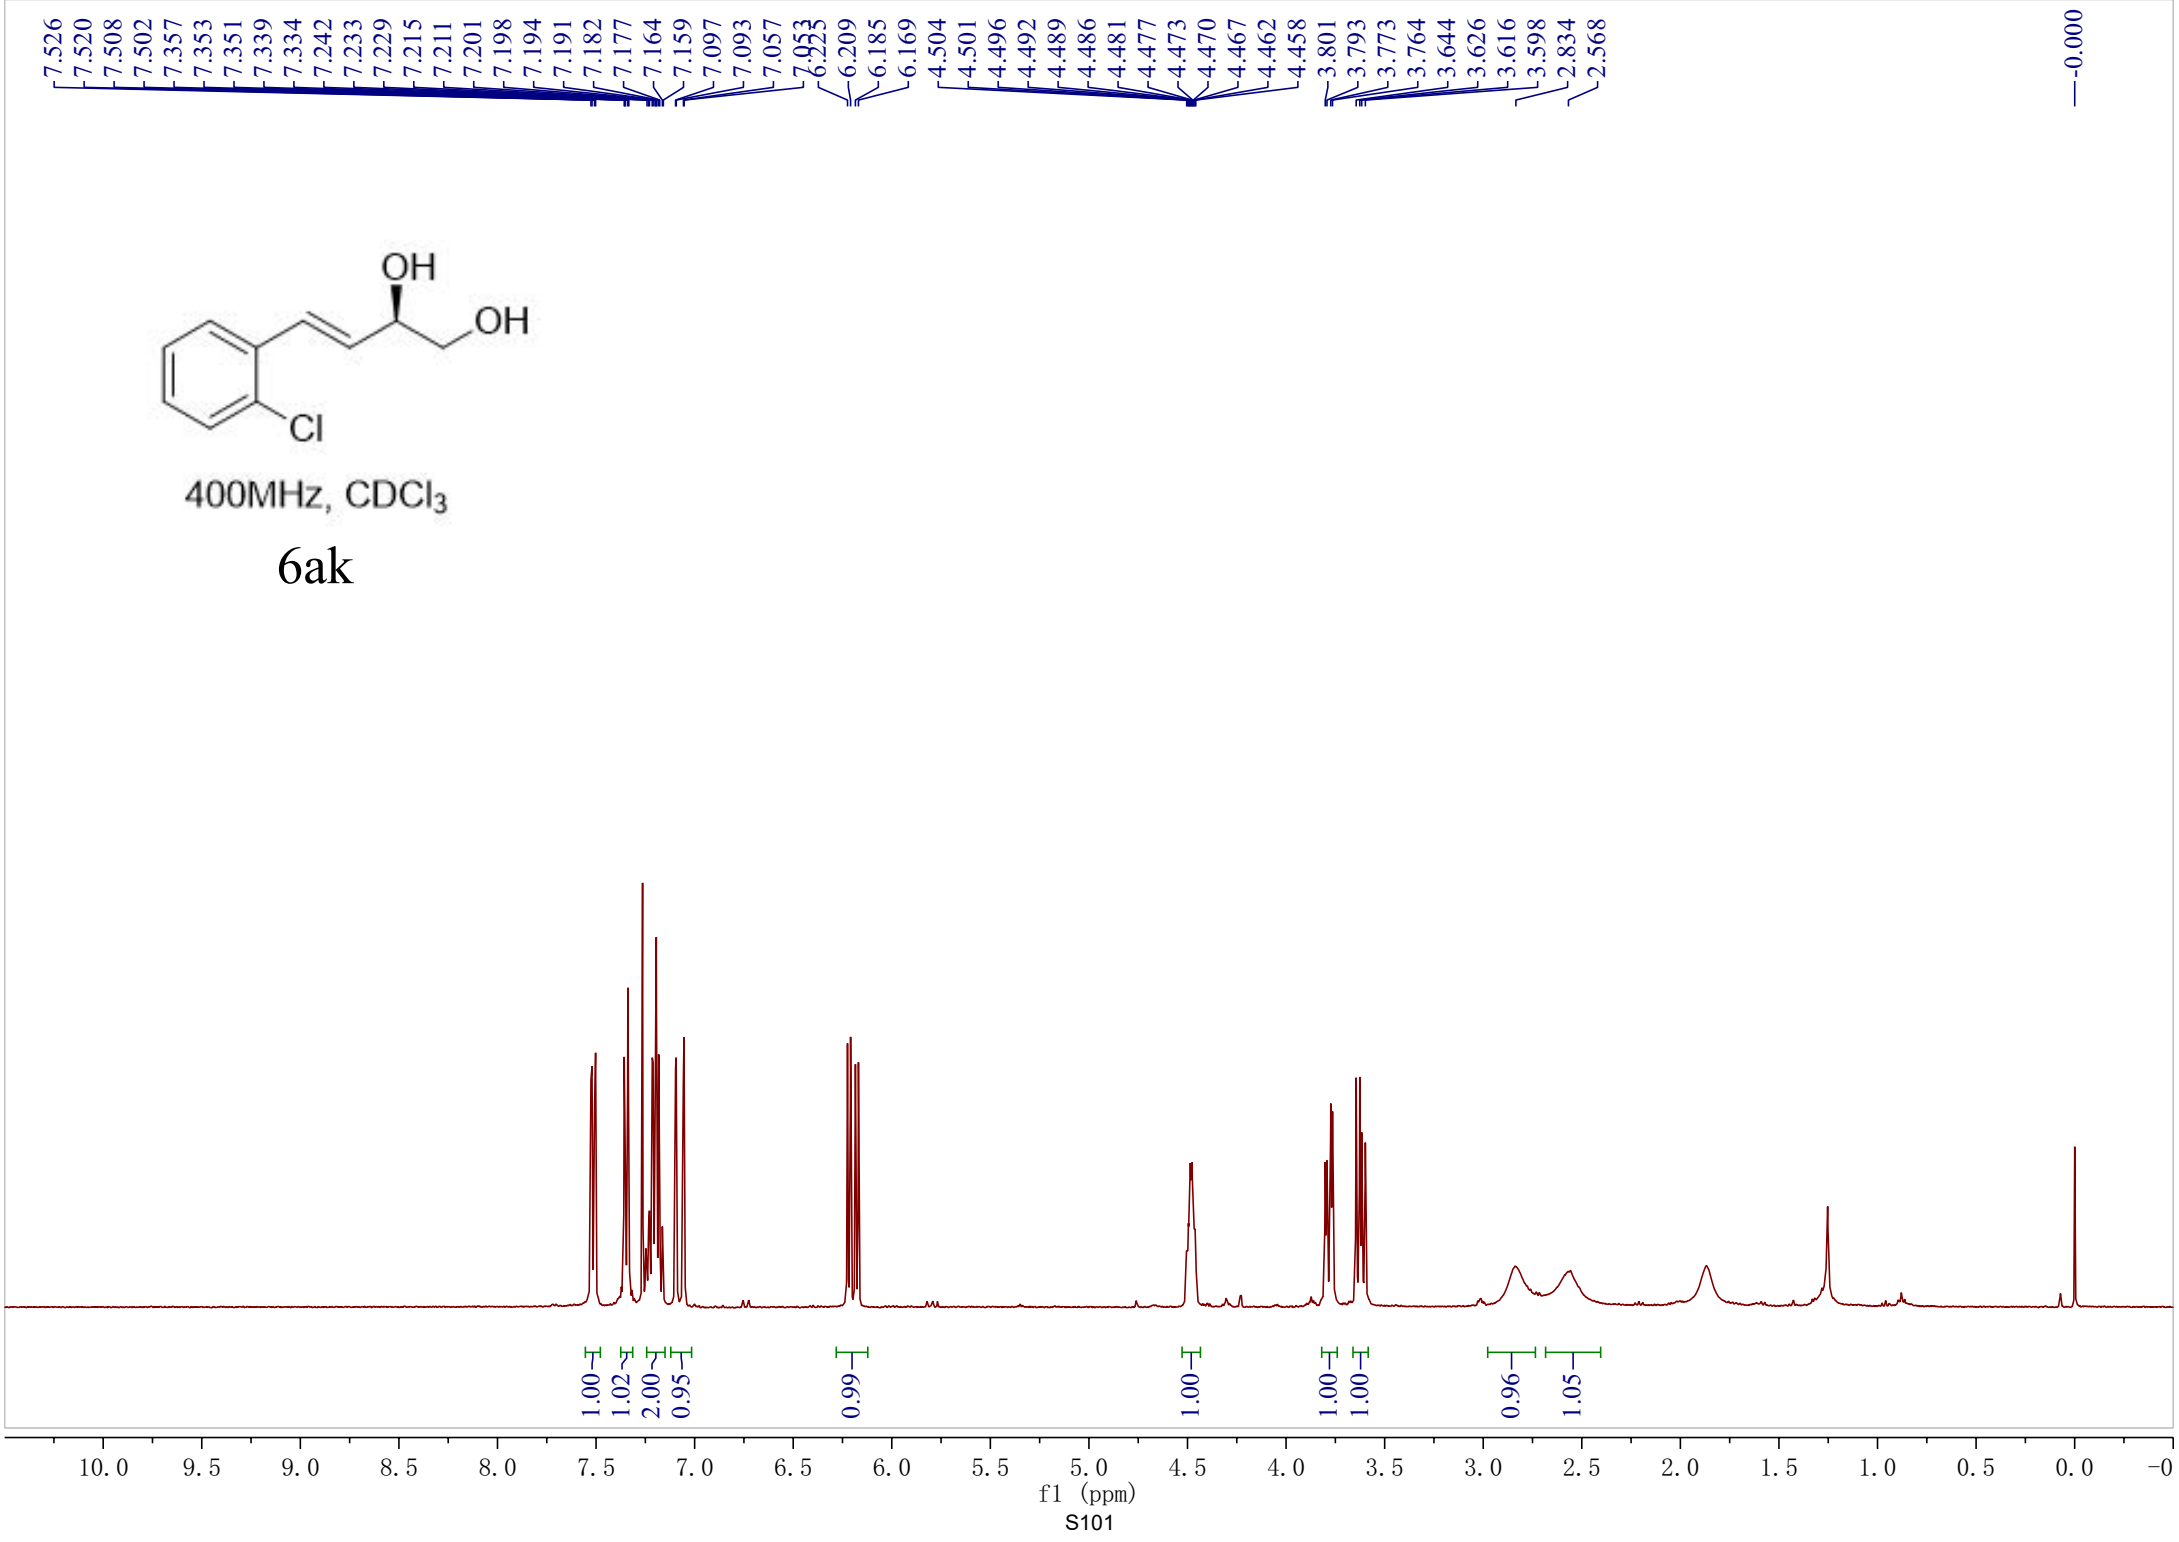

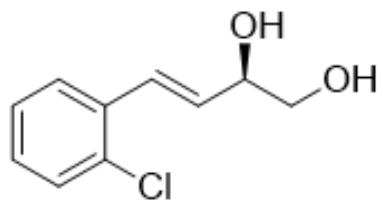

100MHz, CDCl<sub>3</sub>

6ak

134.506  
133.212  
130.718  
129.754  
128.927  
128.274  
126.930  
126.902

73.188  
66.400

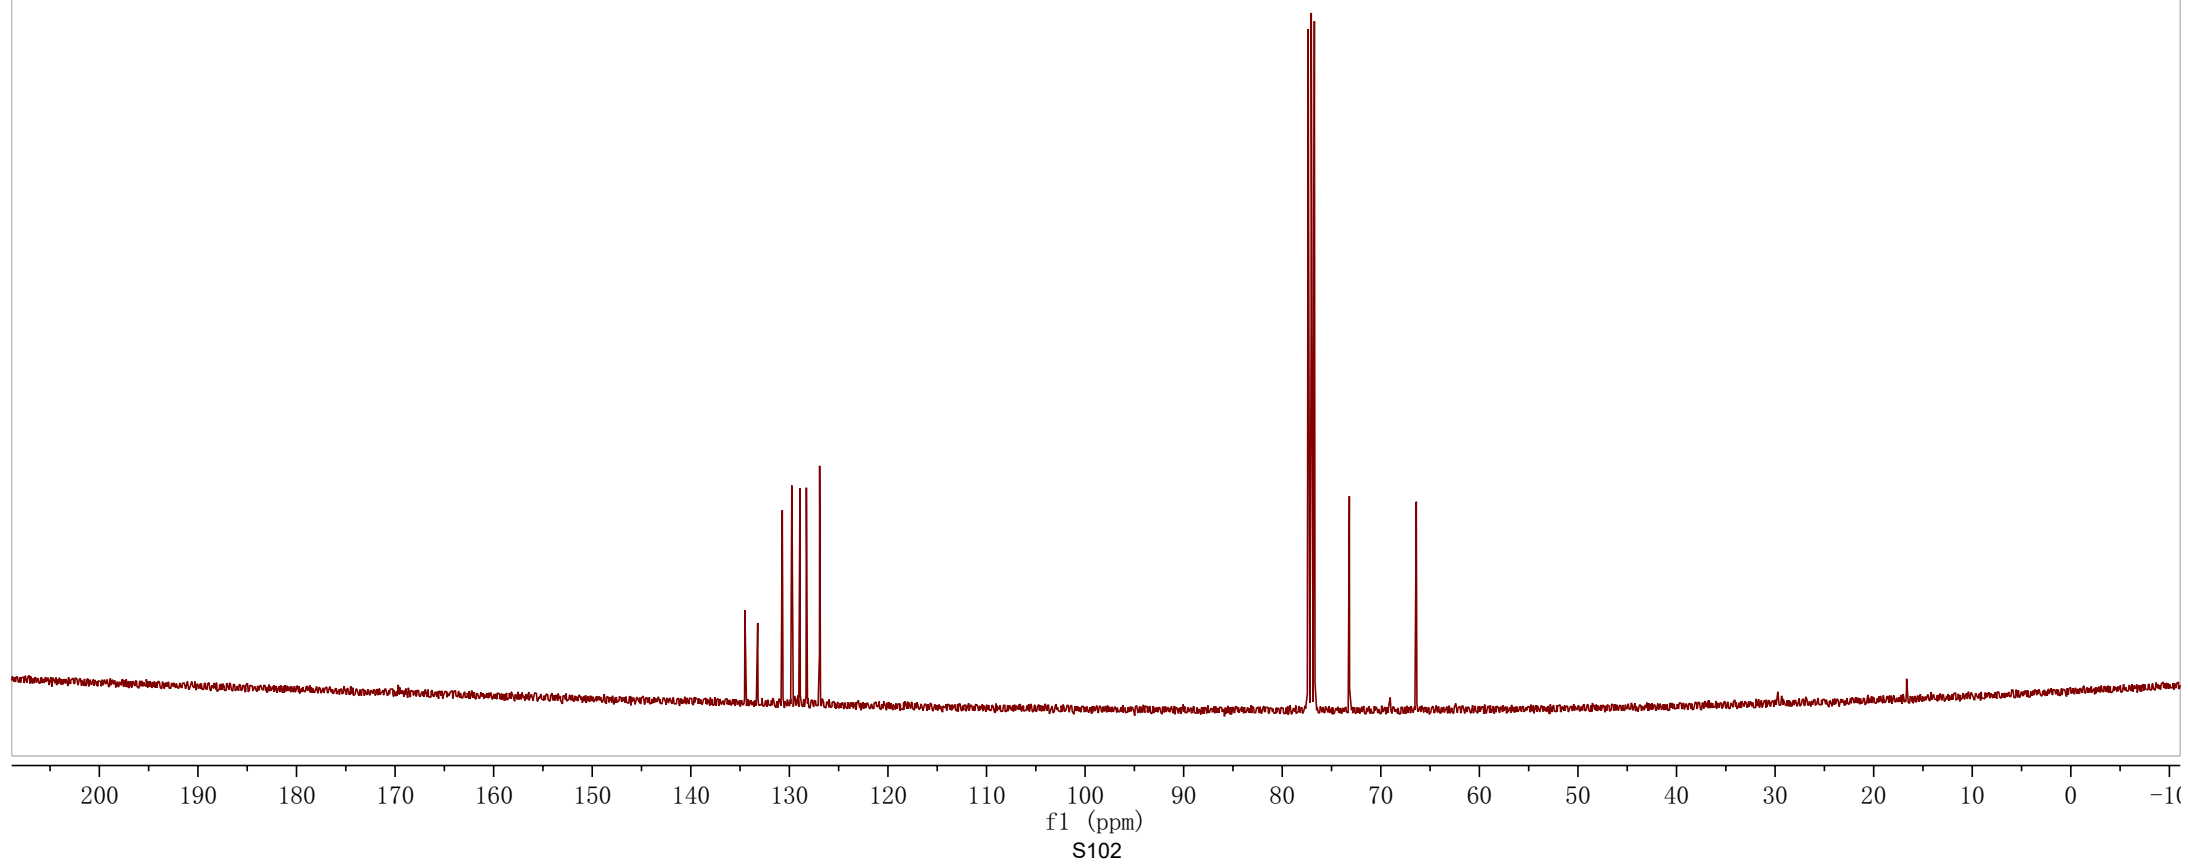



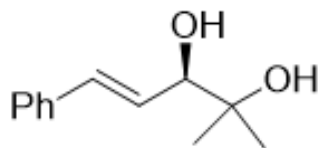

400MHz, CDCl<sub>3</sub>

7ad

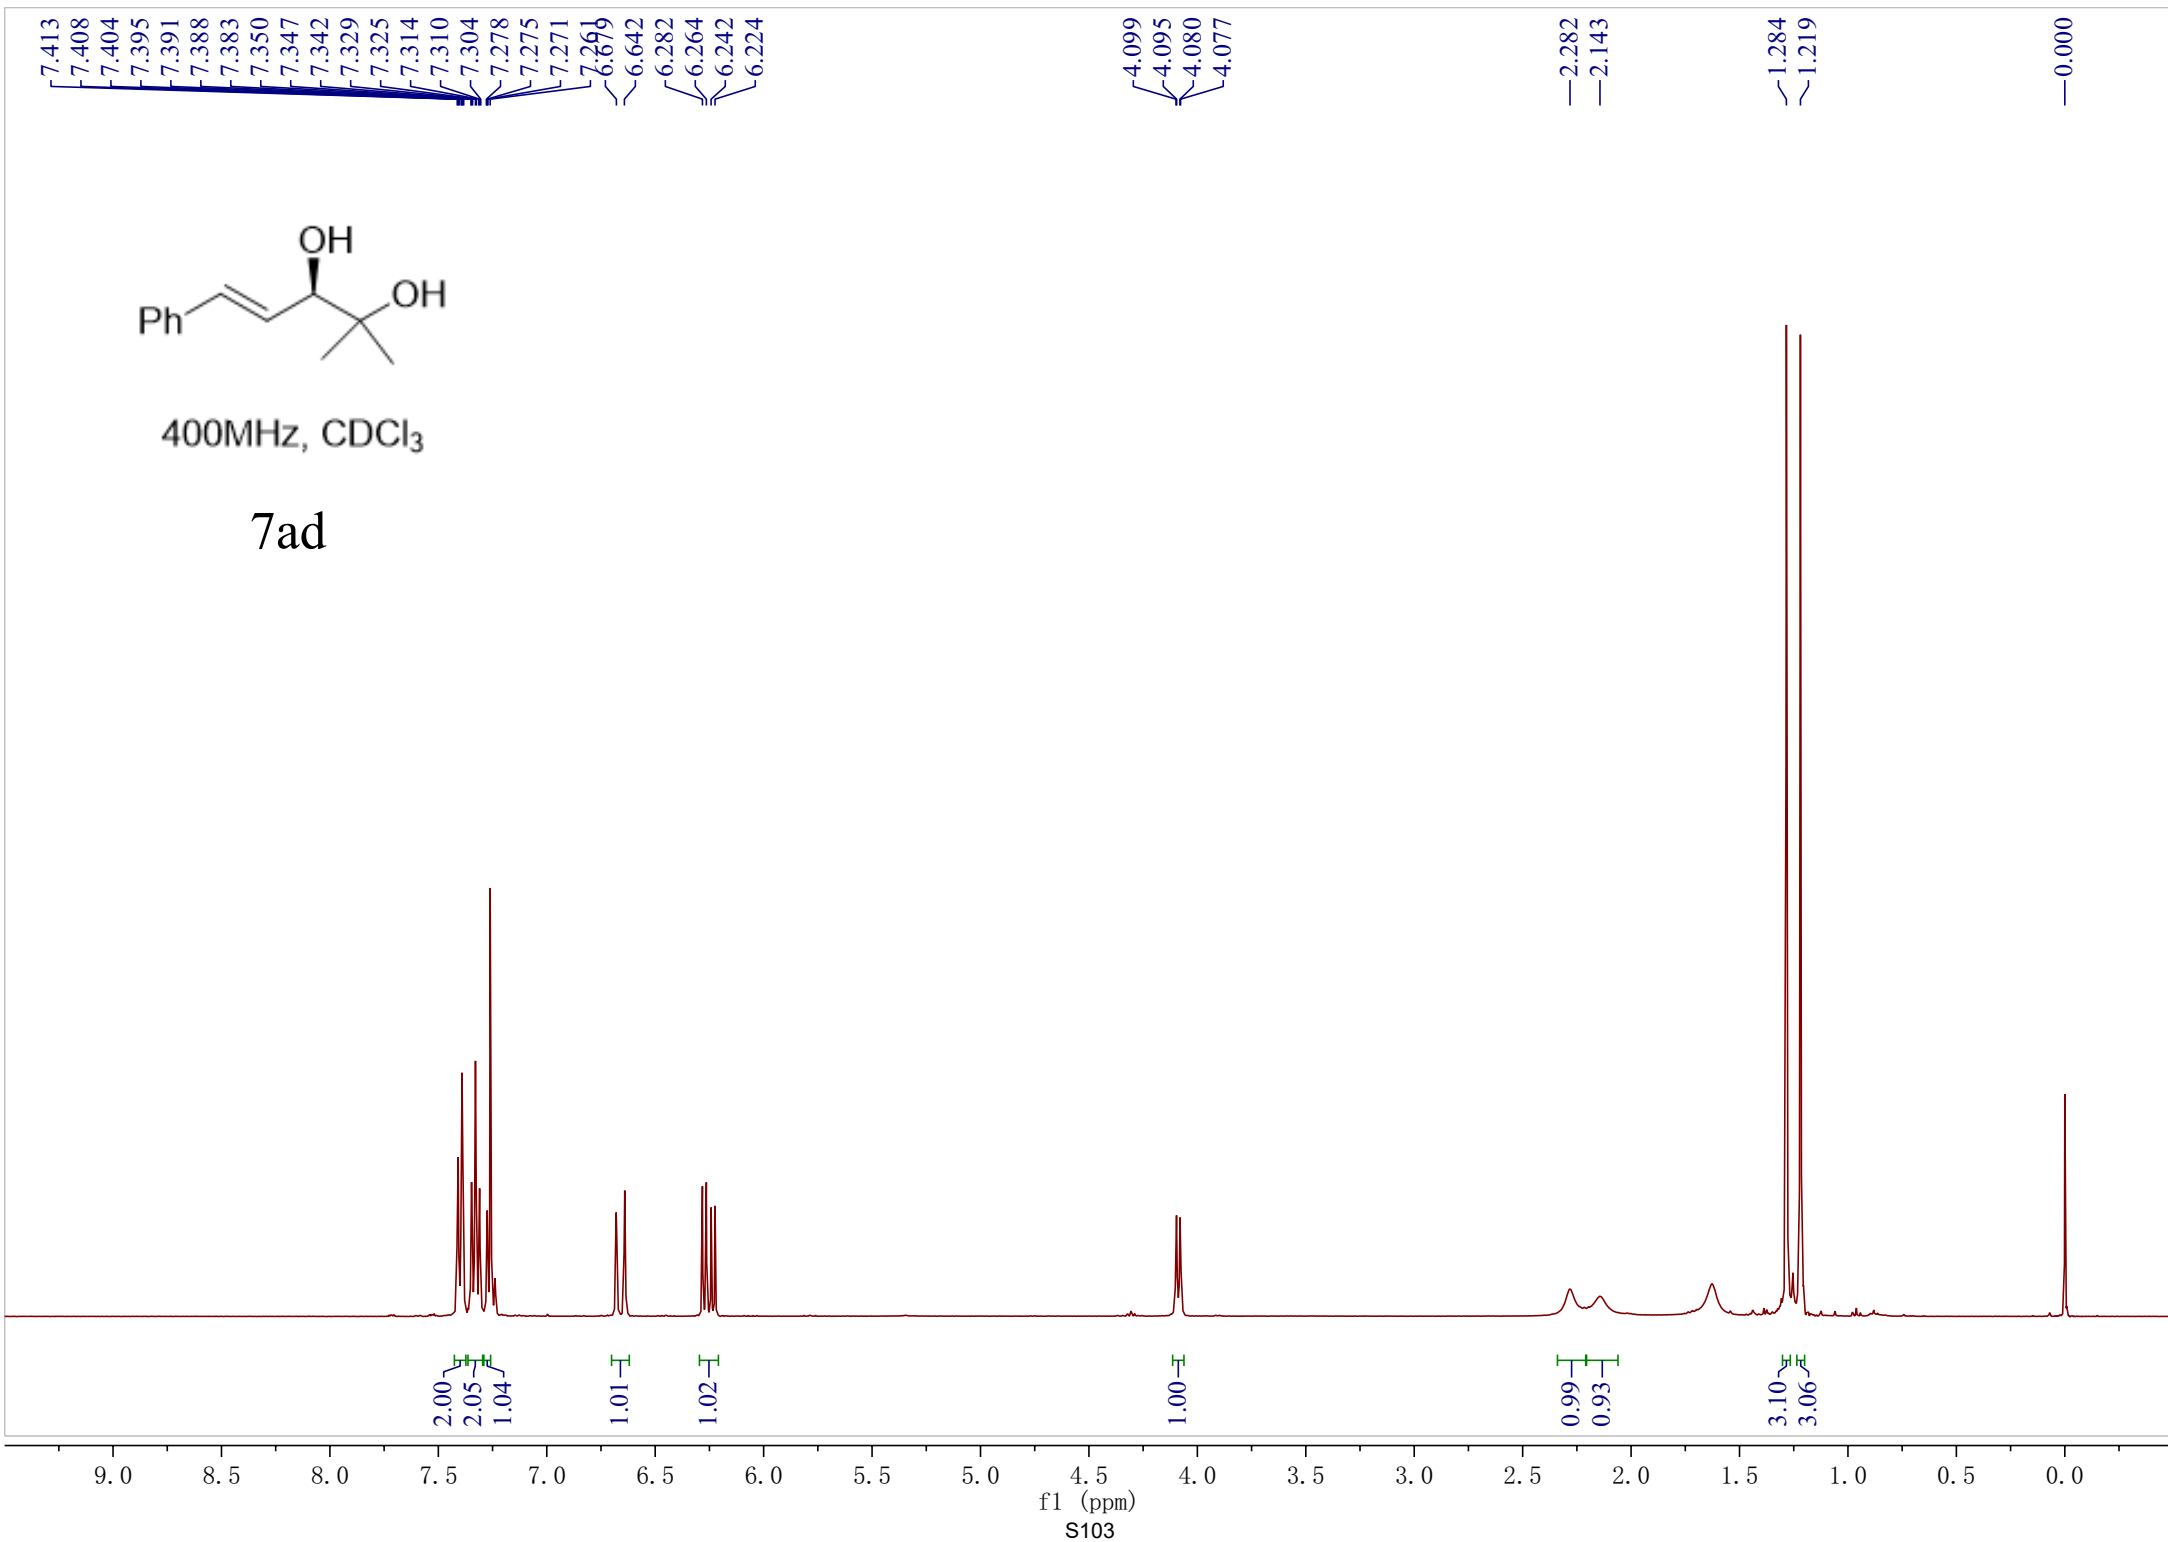

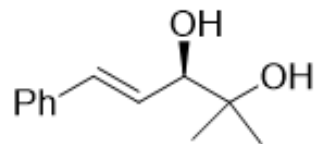

100MHz, CDCl<sub>3</sub>

7ad

136.489  
133.011  
128.642  
127.912  
127.757  
126.562

79.761  
73.087

26.485  
23.943

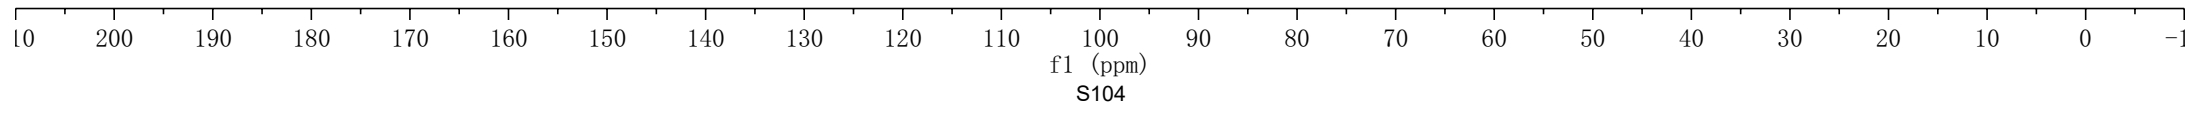

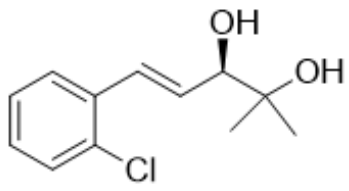

400MHz, CDCl<sub>3</sub>

7ak

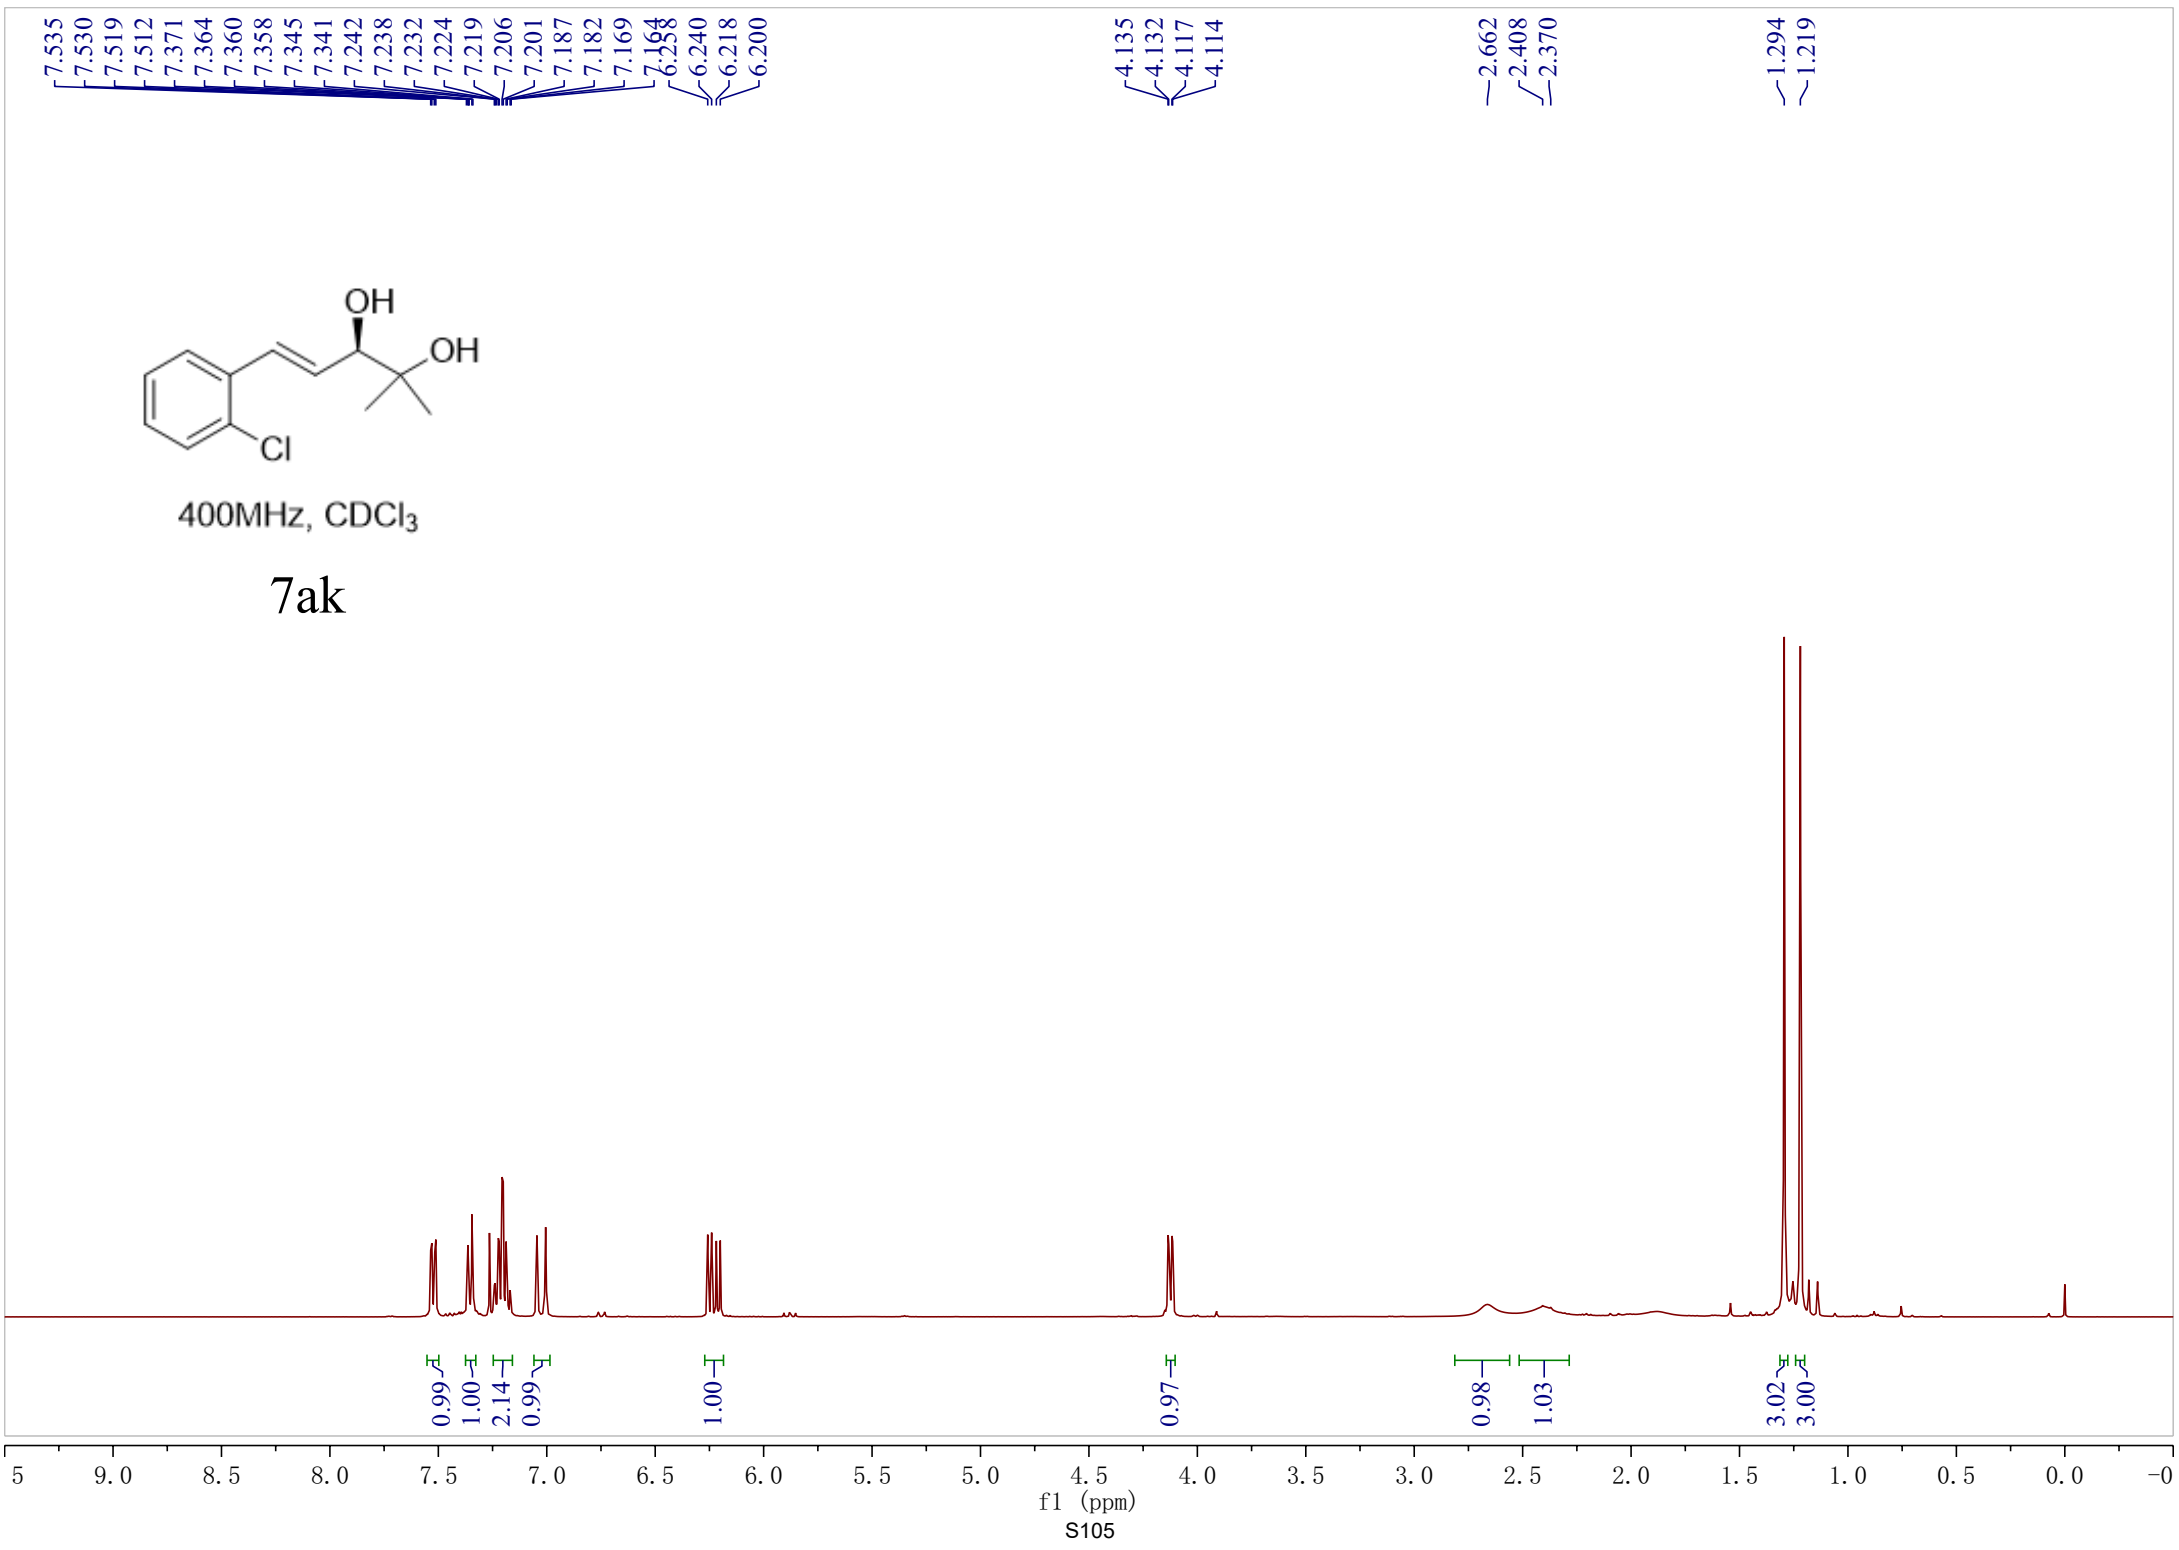

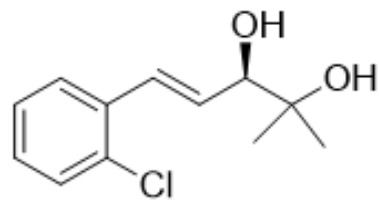

100MHz, CDCl<sub>3</sub>

7ak

134.776  
133.168  
130.938  
129.736  
129.140  
128.858  
127.034  
126.901

79.617  
73.066

26.500  
23.983

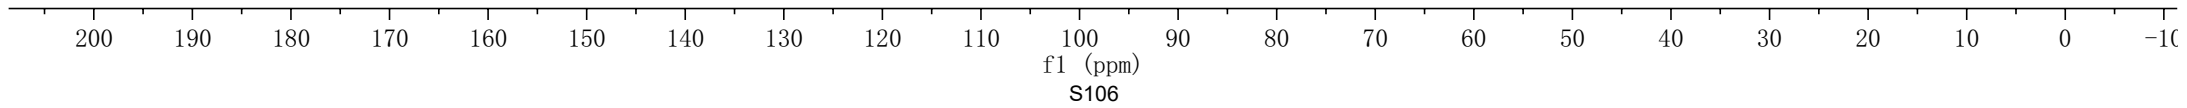

Daicel Chiralpak IA column, n-hexane/i-PrOH= 90/10, flow rate= 1ml/min, l= 225 nm

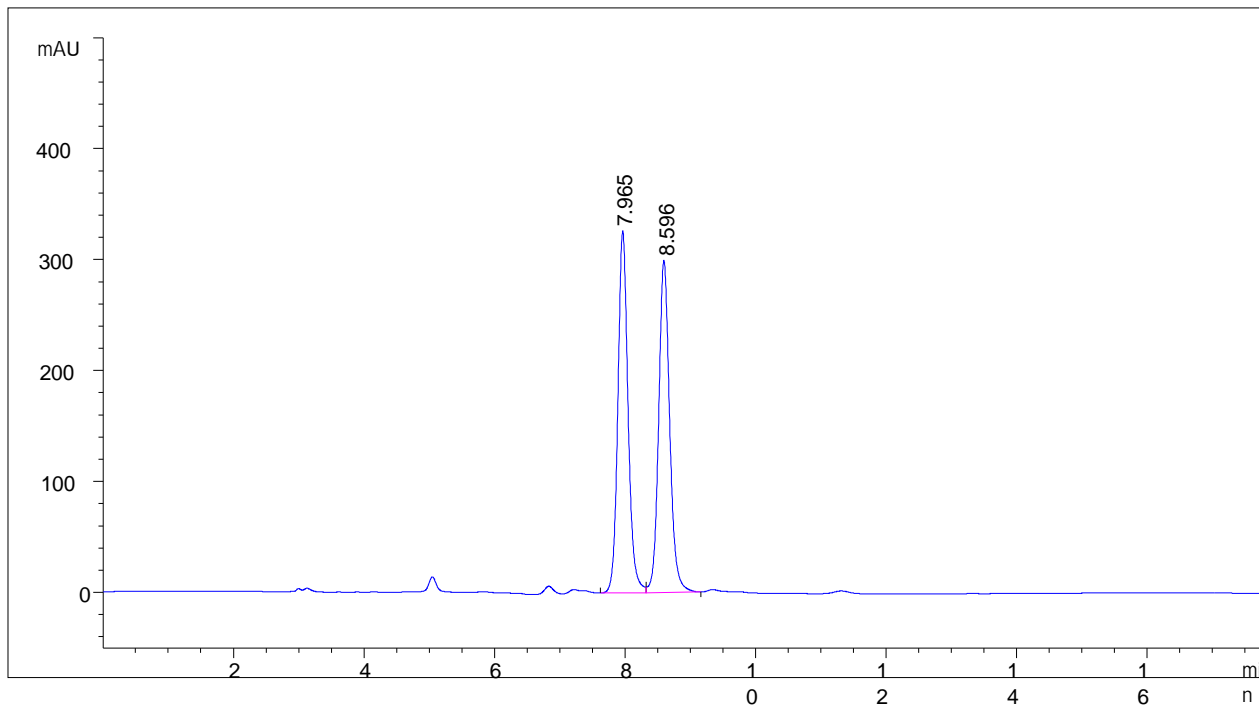

DYU\_FYhH]aY HndY`K] Xh\`5fYU`<Y] [\h`5fYU

| # | [min] | [min] | [mAU*s] | [mAU]      | %         |         |
|---|-------|-------|---------|------------|-----------|---------|
| 1 | 7.965 | BV    | 0.1646  | 3543.10278 | 326.47565 | 50.2250 |
| 2 | 8.596 | VB    | 0.1789  | 3511.35767 | 299.19202 | 49.7750 |

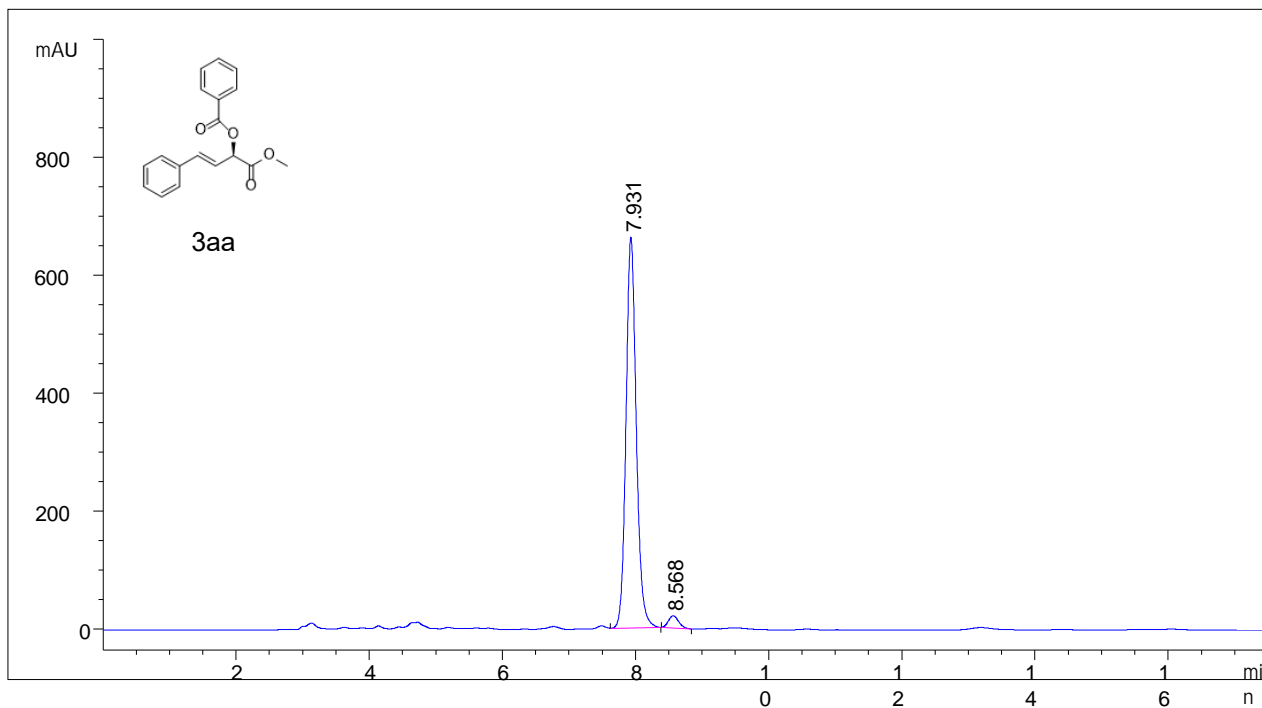

DYU\_FYhH]aY HndY`K] Xh\`5fYU`<Y] [\h`5fYU

| # | [min] | [min] | [mAU*s] | [mAU]      | %         |         |
|---|-------|-------|---------|------------|-----------|---------|
| 1 | 7.931 | MM    | 0.1787  | 7103.59473 | 662.44354 | 96.9323 |
| 2 | 8.568 | MM    | 0.1799  | 224.81451  | 20.83109  | 3.0677  |

Daicel Chiralpak IA column, n-hexane/i-PrOH= 99/1, flow rate= 1ml/min, l= 225 nm

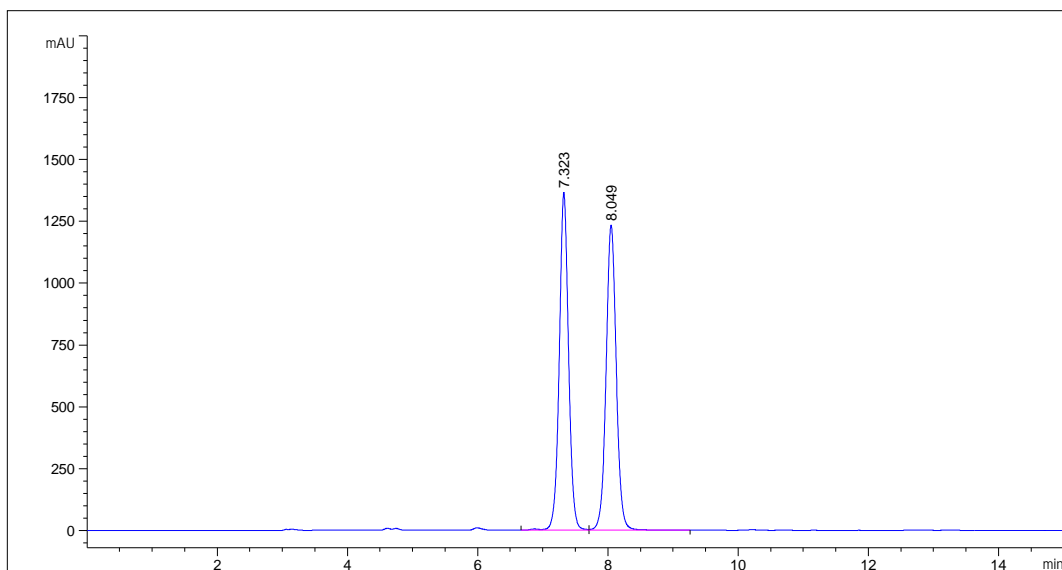

| # | [min] | [min] | [mAU*s]   | [mAU]      | %       |
|---|-------|-------|-----------|------------|---------|
| 1 | 7.323 | 7.323 | 1.35878e4 | 1366.67114 | 50.3647 |
| 2 | 8.049 | 8.049 | 1.33910e4 | 1233.83960 | 49.6353 |

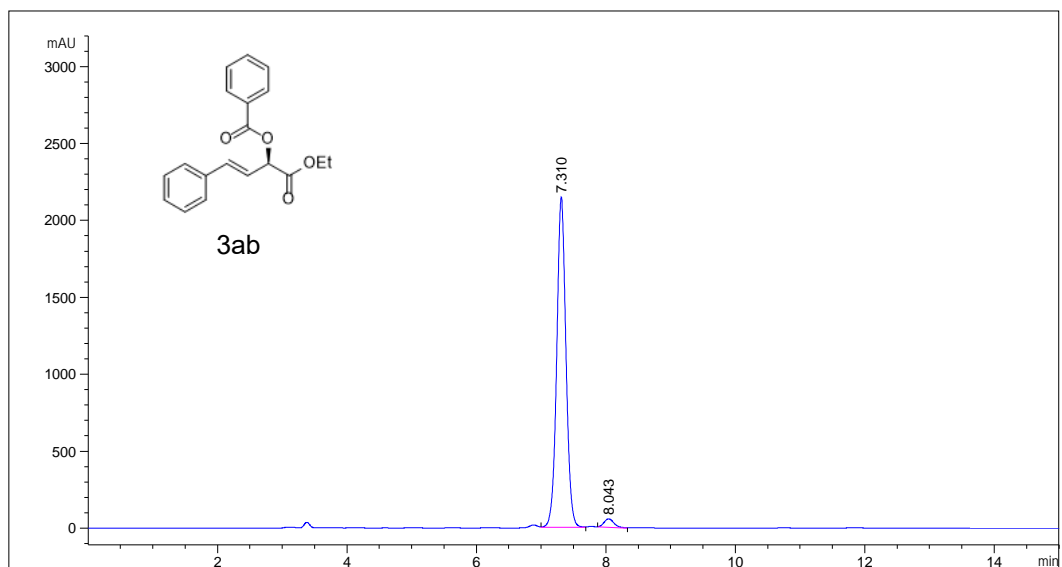

| # | [min] | [min] | [mAU*s]   | [mAU]      | %       |
|---|-------|-------|-----------|------------|---------|
| 1 | 7.310 | 7.310 | 2.13320e4 | 2147.56055 | 97.2864 |
| 2 | 8.043 | 8.043 | 595.00867 | 55.94276   | 2.7136  |

Daicel Chiralpak IA column, n-hexane/i-PrOH= 90/10, flow rate= 1ml/min, l= 225 nm

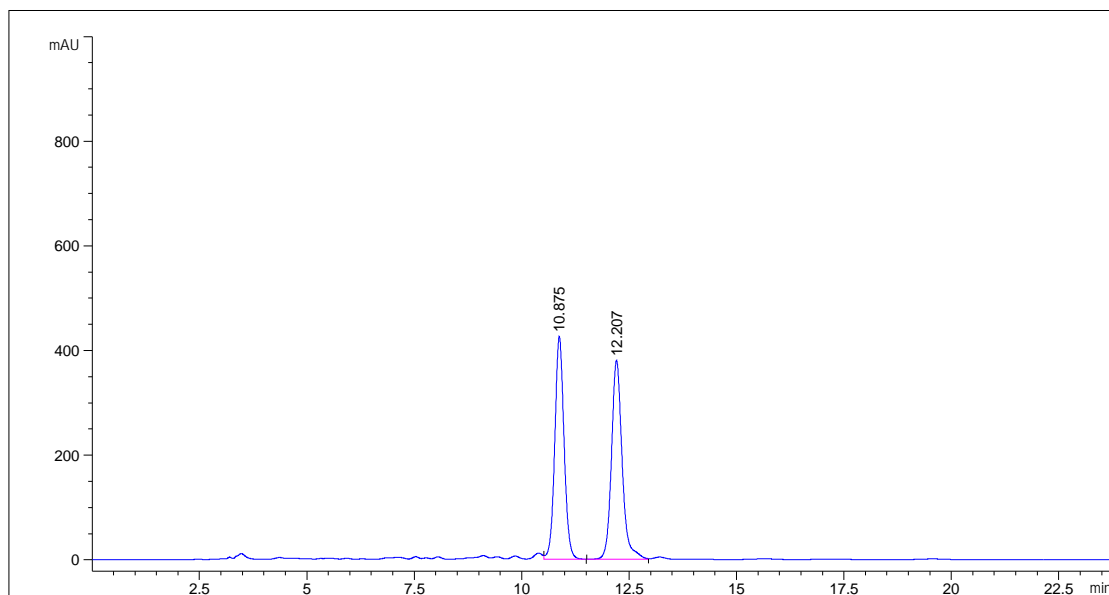

| # | [mi n] | [mi n] | [mAU*s]           | [mAU]     | %       |
|---|--------|--------|-------------------|-----------|---------|
| 1 | 10.875 | FM     | 0.2499 6379.17139 | 425.47589 | 49.2960 |
| 2 | 12.207 | MF     | 0.2878 6561.36865 | 379.94095 | 50.7040 |

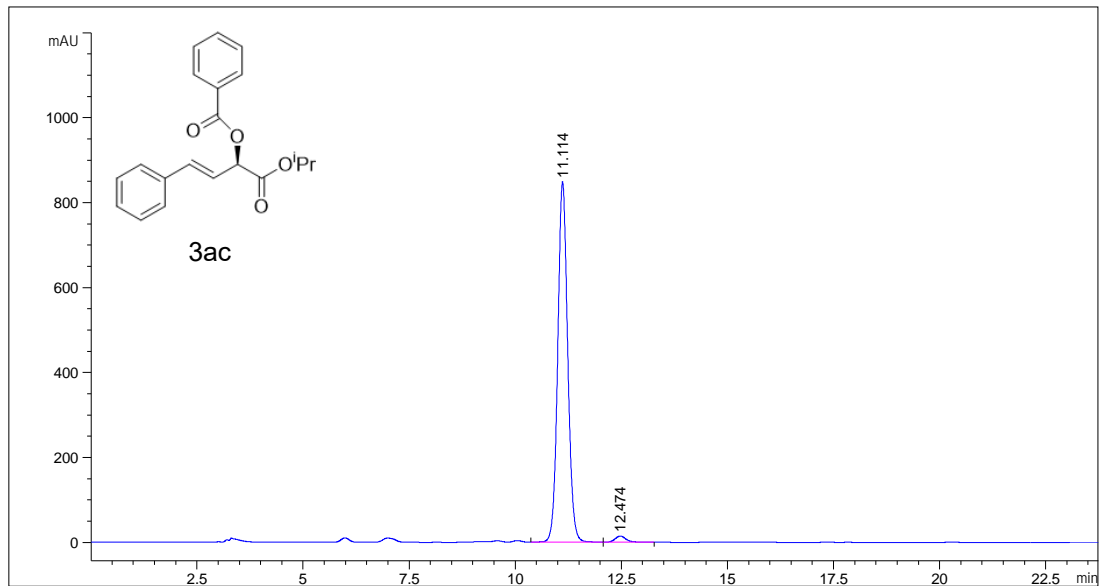

| # | [mi n] | [mi n] | [mAU*s]          | [mAU]     | %       |
|---|--------|--------|------------------|-----------|---------|
| 1 | 11.114 | BB     | 0.2501 1.38259e4 | 848.55725 | 98.0982 |
| 2 | 12.474 | BB     | 0.2754 268.03305 | 14.72089  | 1.9018  |

Daicel Chiralpak IA column, n-hexane/i-PrOH= 90/10, flow rate= 1ml/min, l= 225 nm

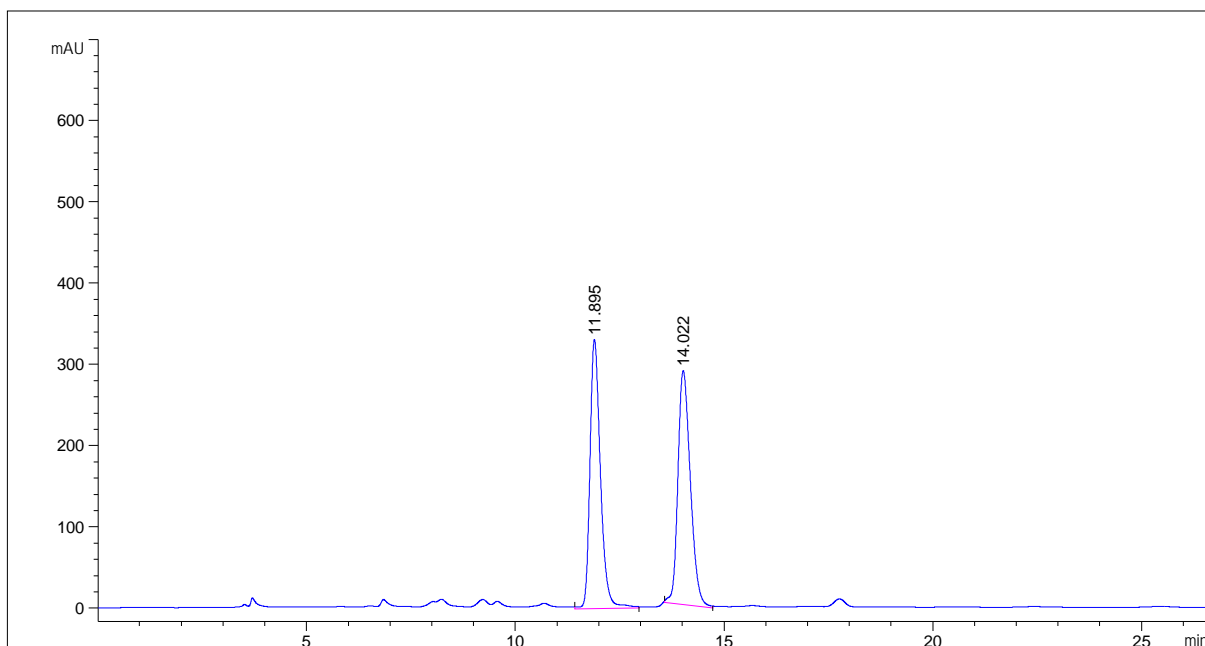

| # | [min]  | [min] | [mAU*s] | [mAU]      | %         |         |
|---|--------|-------|---------|------------|-----------|---------|
| 1 | 11.895 | MM    | 0.2910  | 5782.97168 | 331.26053 | 49.2854 |
| 2 | 14.022 | MM    | 0.3442  | 5950.67627 | 288.10541 | 50.7146 |

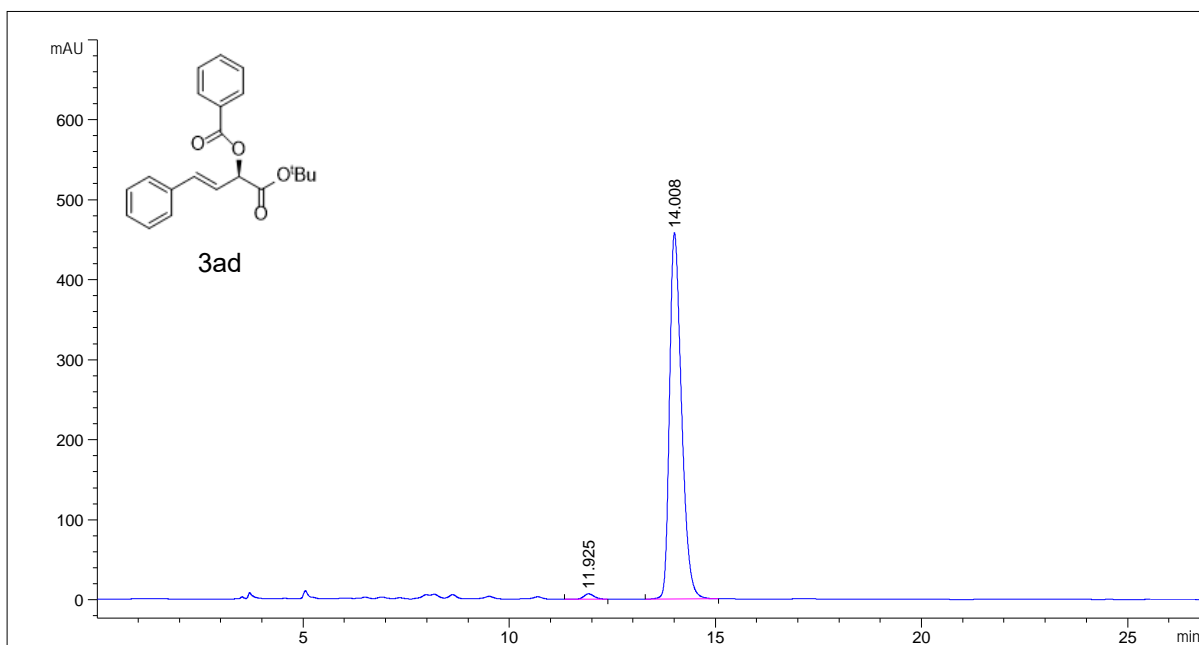

| # | [min]  | [min] | [mAU*s] | [mAU]      | %         |         |
|---|--------|-------|---------|------------|-----------|---------|
| 1 | 11.925 | BB    | 0.2670  | 118.98124  | 6.77290   | 1.2694  |
| 2 | 14.008 | BB    | 0.3121  | 9254.13965 | 457.32693 | 98.7306 |



Daicel Chiralpak IA column, n-hexane/i-PrOH= 99/1, flow rate= 1ml/min, l= 225 nm

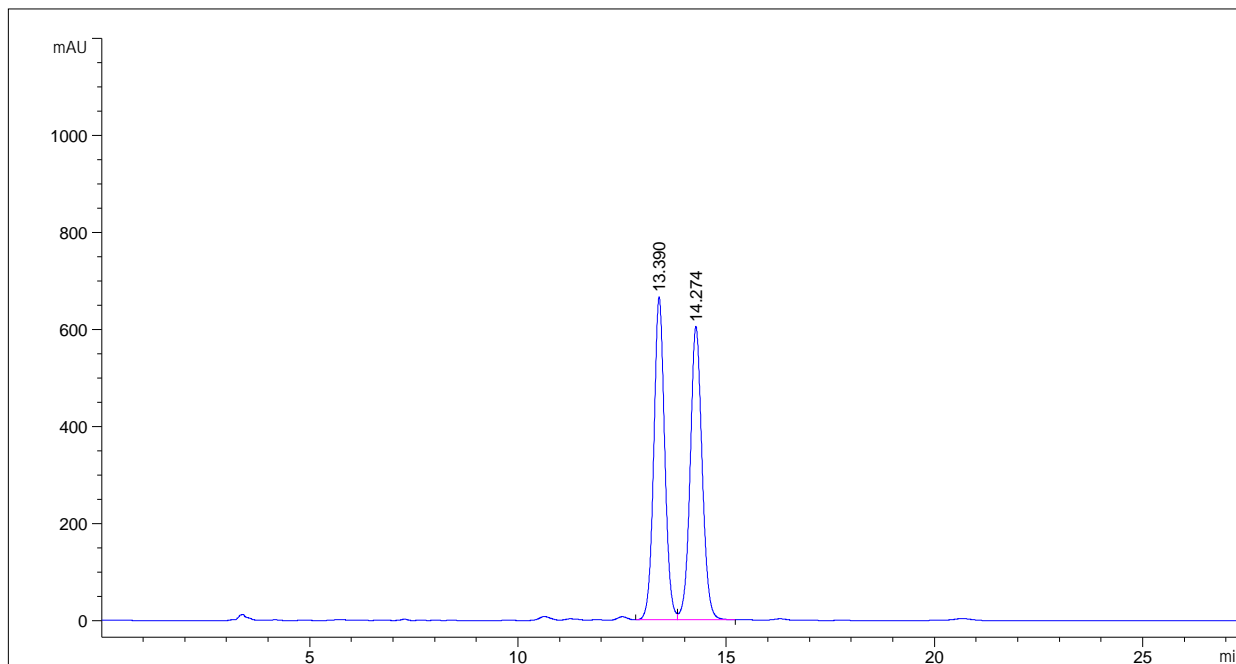

DYU\_FYhH aY HndY K Xh\ 5fYU <Y [\h 5fYU

| # | [mi n]    | [mi n] | [mAU*s]   | [mAU]     | %       |
|---|-----------|--------|-----------|-----------|---------|
| 1 | 13.390 BV | 0.2794 | 1.20995e4 | 664.67523 | 50.1028 |
| 2 | 14.274 VB | 0.3048 | 1.20499e4 | 603.93945 | 49.8972 |

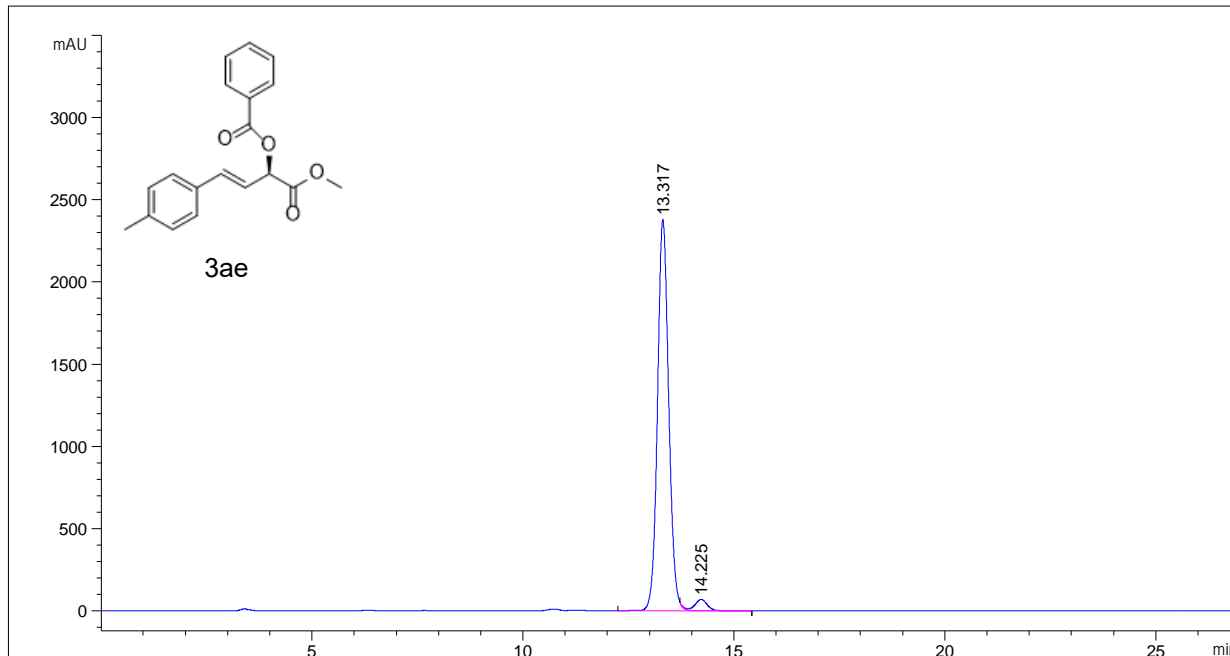

DYU\_FYhH aY HndY K Xh\ 5fYU <Y [\h 5fYU

| # | [mi n]      | [mi n] | [mAU*s]    | [mAU]      | %       |
|---|-------------|--------|------------|------------|---------|
| 1 | 13.317 W R  | 0.2842 | 4.40992e4  | 2376.69922 | 96.7728 |
| 2 | 14.225 VB E | 0.3136 | 1470.61548 | 70.14804   | 3.2272  |

Daicel Chiralpak IA column, n-hexane/i-PrOH= 90/10, flow rate= 1ml/min, l= 225 nm

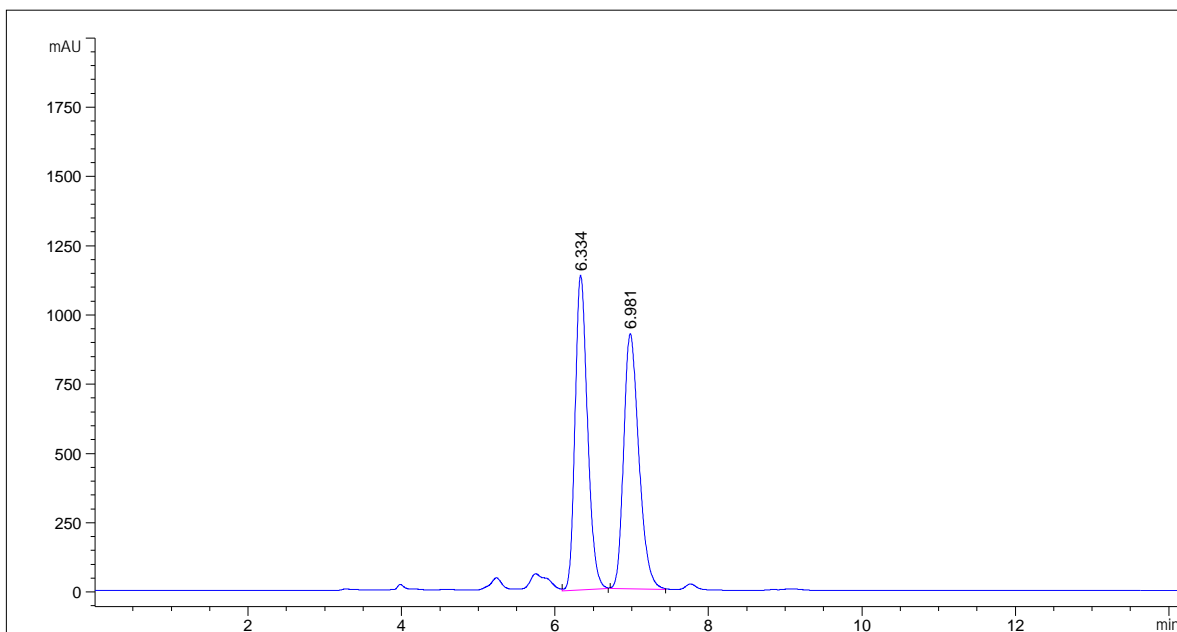

DYU\_FYhH] aY HndY` K] Xh\` . . . 5f YU . . . . . <Y] [\`h . . . . . 5f YU

| # | [mi n]   | [mi n] | [mAU*s]   | [mAU]      | %       |
|---|----------|--------|-----------|------------|---------|
| 1 | 6.334 MM | 0.1875 | 1.27712e4 | 1135.26404 | 50.1998 |
| 2 | 6.981 MM | 0.2292 | 1.26695e4 | 921.13525  | 49.8002 |

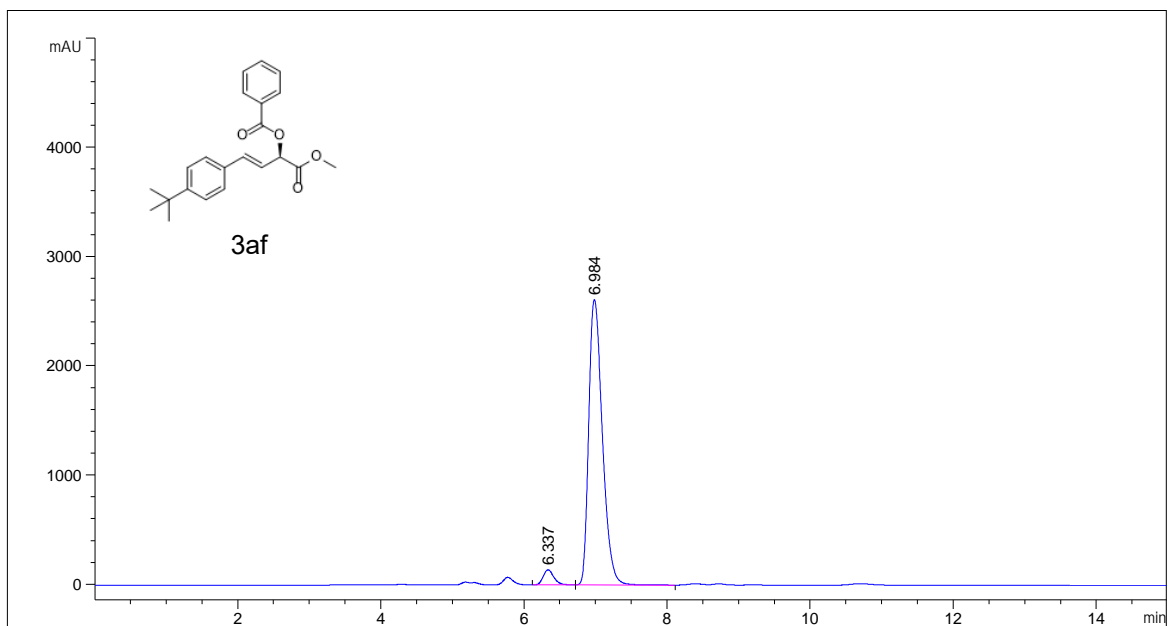

DYU\_FYhH] aY HndY` K] Xh\` . . . 5f YU . . . . . <Y] [\`h . . . . . 5f YU

| # | [mi n]   | [mi n] | [mAU*s]    | [mAU]      | %       |
|---|----------|--------|------------|------------|---------|
| 1 | 6.337 BV | 0.1628 | 1478.91553 | 139.36082  | 4.1059  |
| 2 | 6.984 VB | 0.2042 | 3.45407e4  | 2612.80713 | 95.8941 |

Daicel Chiralpak IA column, n-hexane/i-PrOH= 90/10, flow rate= 1ml/min, l= 225 nm

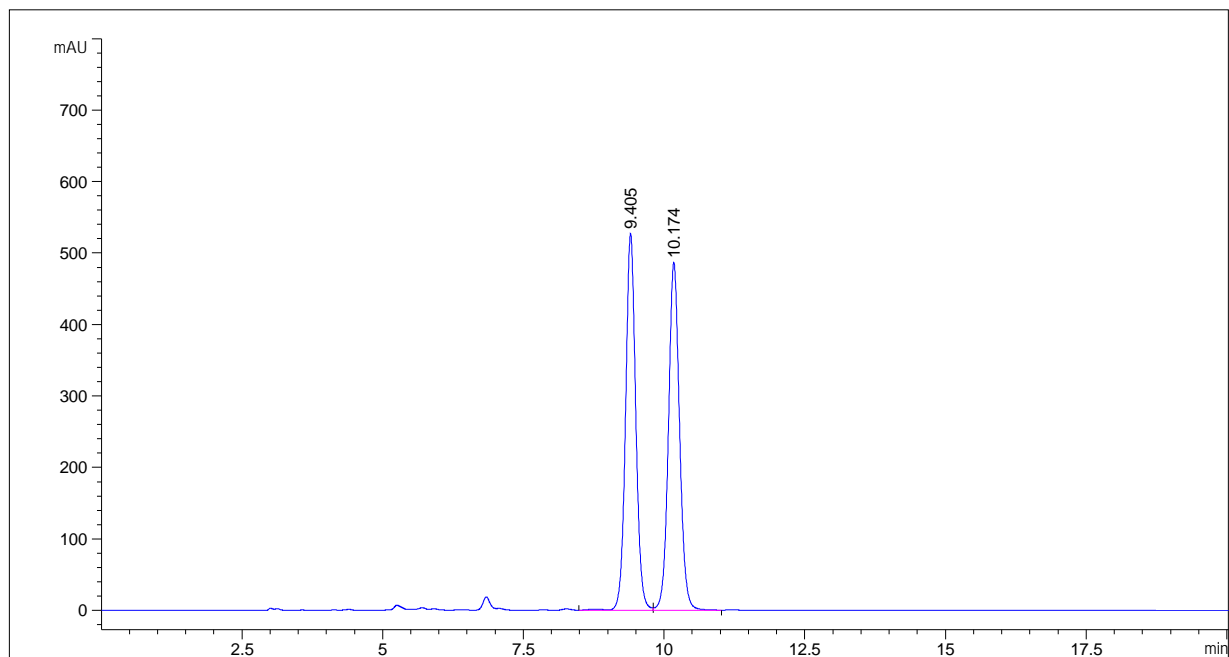

DYU FYhH aY HdY K] Xh\ 5f YU <Y] [\h 5f YU

| # | [min]  | [min] | [mAU*s] | [mAU]      | %         |         |
|---|--------|-------|---------|------------|-----------|---------|
| 1 | 9.405  | VV R  | 0.1918  | 6629.52539 | 526.79810 | 49.8685 |
| 2 | 10.174 | VB    | 0.2088  | 6664.49463 | 486.43228 | 50.1315 |

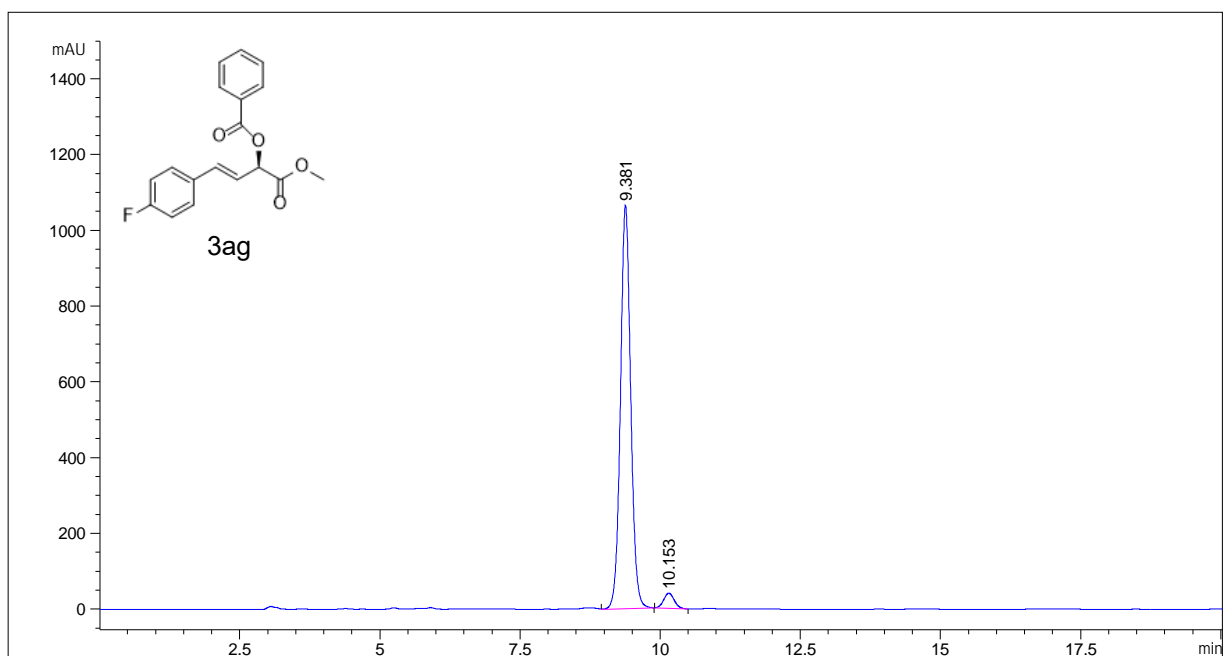

DYU FYhH aY HdY K] Xh\ 5f YU <Y] [\h 5f YU

| # | [min]  | [min] | [mAU*s] | [mAU]     | %          |         |
|---|--------|-------|---------|-----------|------------|---------|
| 1 | 9.381  | MM    | 0.2119  | 1.35429e4 | 1065.27844 | 96.2430 |
| 2 | 10.153 | MM    | 0.2193  | 528.67023 | 40.18607   | 3.7570  |

Daicel Chiralpak IA column, n-hexane/i-PrOH= 80/20, flow rate= 1ml/min, l= 225 nm

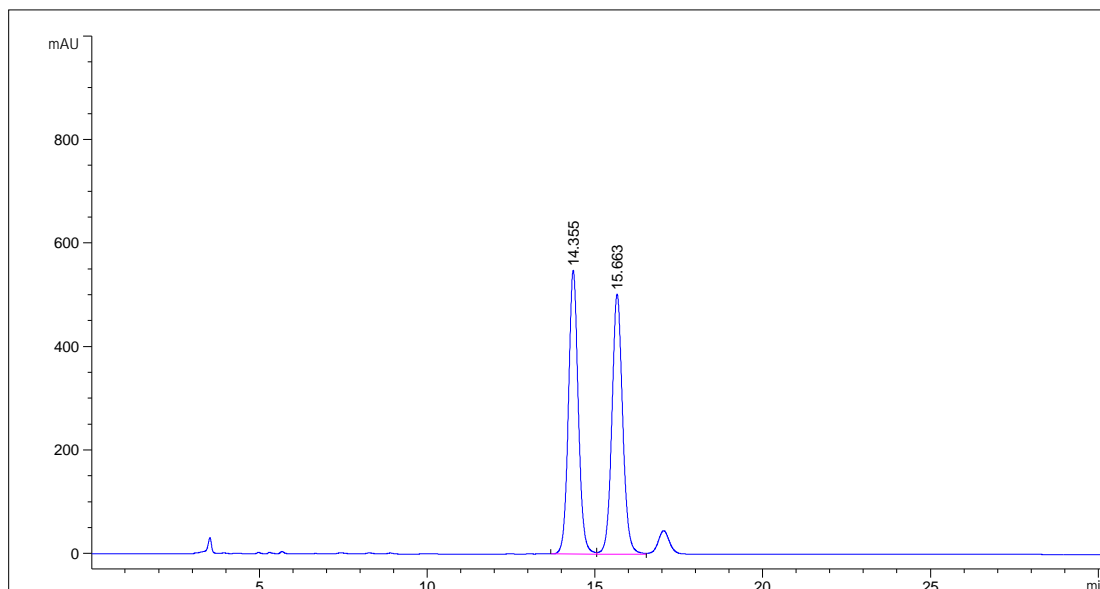

| # | [min]  | [min] | [mAU*s] | [mAU]     | %         |         |
|---|--------|-------|---------|-----------|-----------|---------|
| 1 | 14.355 | BV    | 0.3102  | 1.11456e4 | 548.20746 | 49.8994 |
| 2 | 15.663 | VV    | 0.3399  | 1.11906e4 | 502.26080 | 50.1006 |

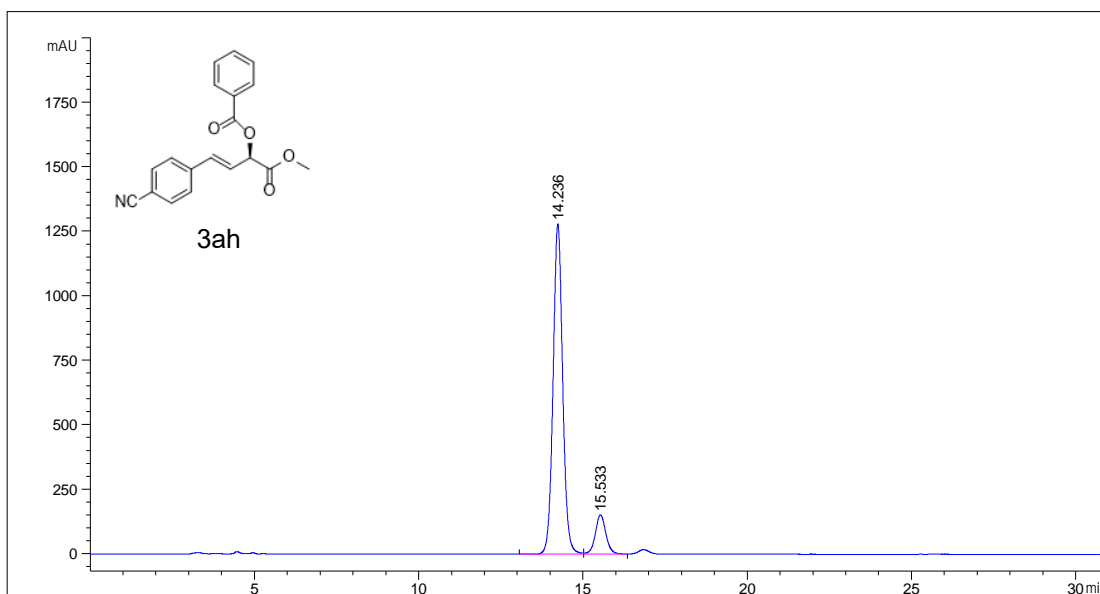

| # | [min]  | [min] | [mAU*s] | [mAU]      | %          |         |
|---|--------|-------|---------|------------|------------|---------|
| 1 | 14.236 | BV    | 0.3106  | 2.59528e4  | 1279.96545 | 88.5136 |
| 2 | 15.533 | VB    | 0.3373  | 3367.88672 | 152.11409  | 11.4864 |

Daicel Chiralpak IA column, n-hexane/i-PrOH= 99/1, flow rate= 1ml/min, l= 225 nm

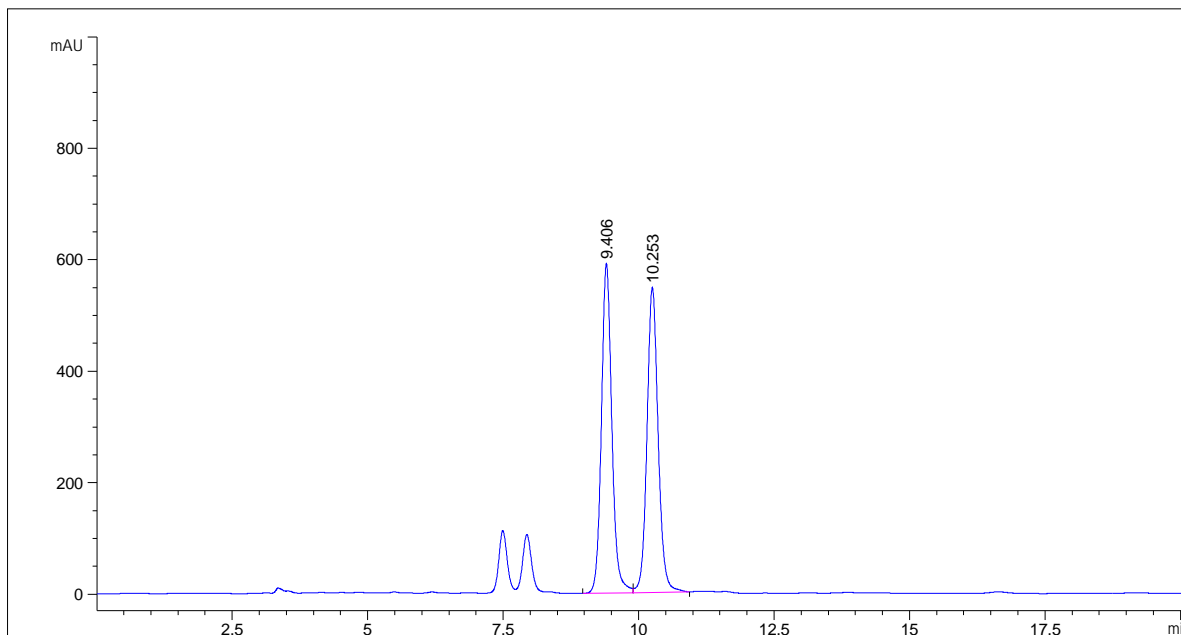

| # | [mi n]    | [mi n] | [mAU*s]    | [mAU]     | %       |
|---|-----------|--------|------------|-----------|---------|
| 1 | 9.406 BV  | 0.2034 | 7918.80811 | 590.81531 | 50.2653 |
| 2 | 10.253 VB | 0.2170 | 7835.20947 | 547.48535 | 49.7347 |

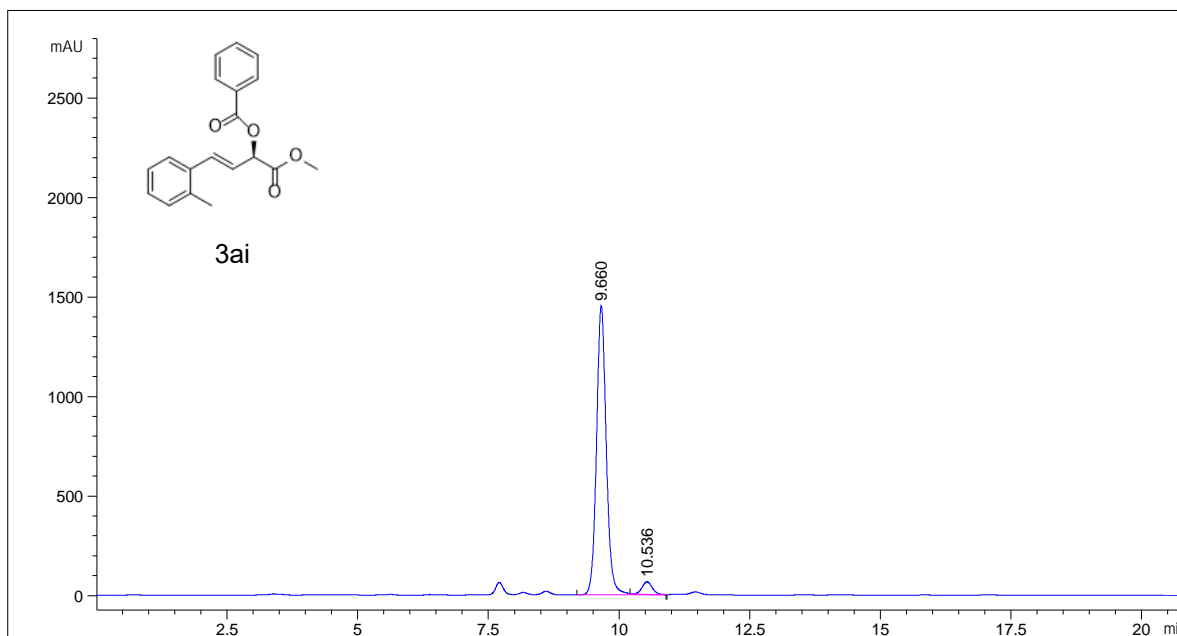

| # | [mi n]      | [mi n] | [mAU*s]   | [mAU]      | %       |
|---|-------------|--------|-----------|------------|---------|
| 1 | 9.660 BV R  | 0.1987 | 1.88809e4 | 1452.40186 | 95.5777 |
| 2 | 10.536 VB E | 0.2080 | 873.60095 | 64.49343   | 4.4223  |

Daicel Chiralpak IA column, n-hexane/i-PrOH= 95/5, flow rate= 1ml/min, l= 225 nm

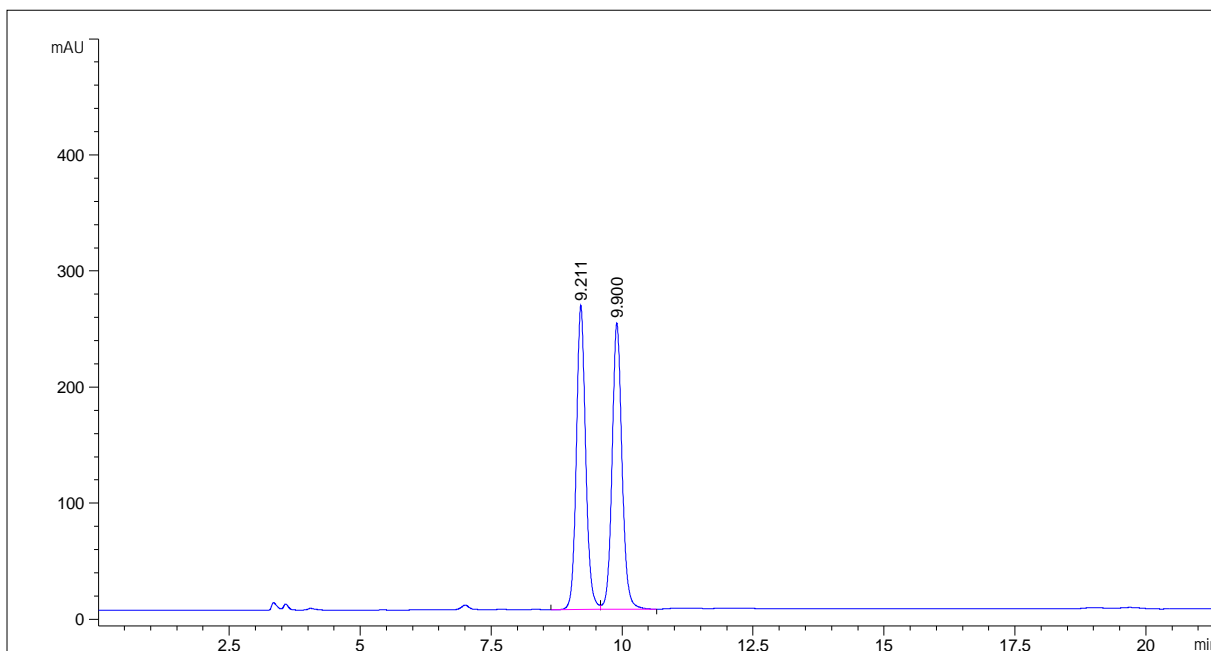

| # | [min]    | [min]  | [mAU*s]    | [mAU]     | %       |
|---|----------|--------|------------|-----------|---------|
| 1 | 9.211 BV | 0.1871 | 3237.52734 | 262.17526 | 49.8969 |
| 2 | 9.900 VB | 0.2007 | 3250.90942 | 246.79601 | 50.1031 |

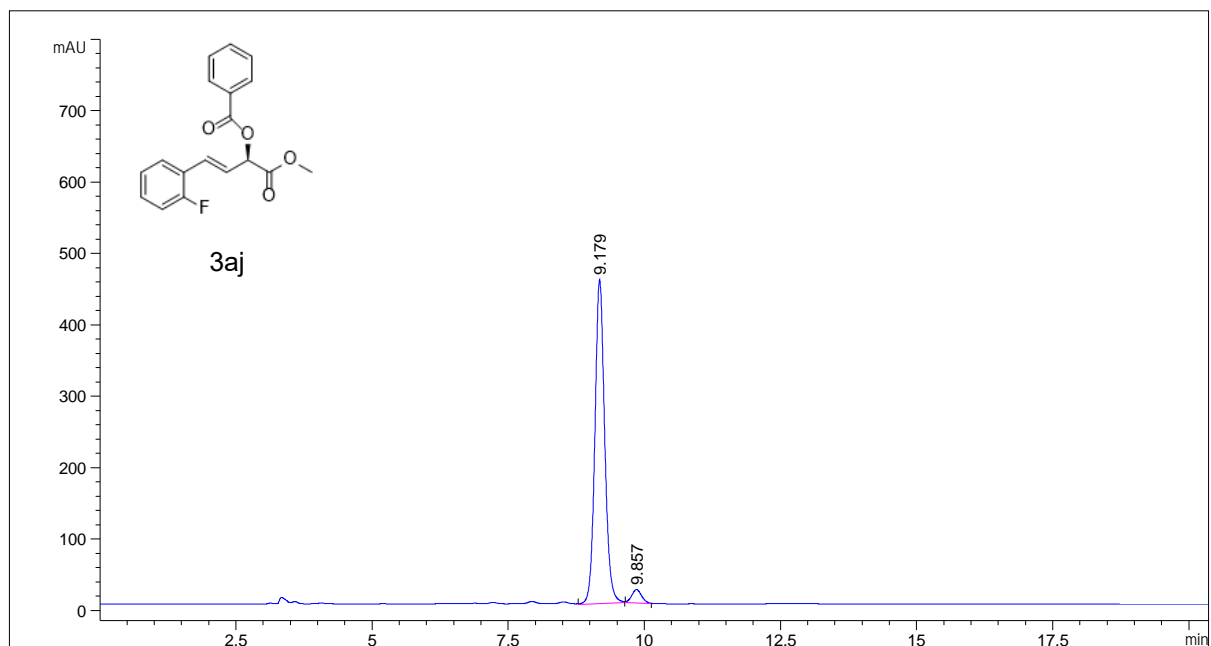

| # | [min]    | [min]  | [mAU*s]    | [mAU]     | %       |
|---|----------|--------|------------|-----------|---------|
| 1 | 9.179 MM | 0.2083 | 5674.10986 | 453.95990 | 95.9659 |
| 2 | 9.857 MM | 0.2102 | 238.52286  | 18.90963  | 4.0341  |

Daicel Chiralpak IA column, n-hexane/i-PrOH= 90/10, flow rate= 1ml/min, I= 225 nm

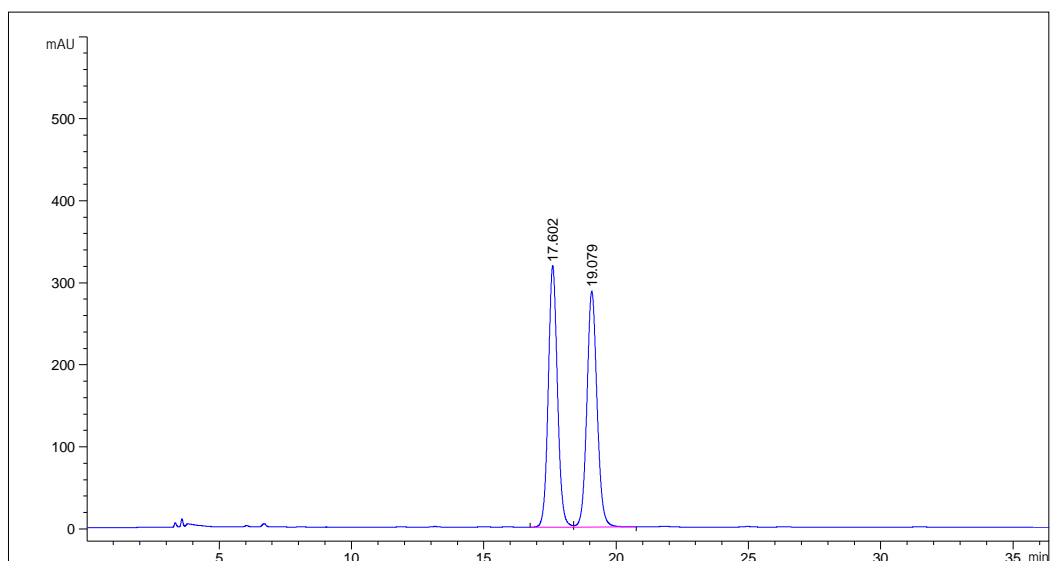

| # | [min]  | [min] | [mAU*s] | [mAU]      | %         |         |
|---|--------|-------|---------|------------|-----------|---------|
| 1 | 17.602 | BV    | 0.3694  | 7685.94385 | 318.66260 | 50.0037 |
| 2 | 19.079 | VB    | 0.4101  | 7684.81689 | 287.27124 | 49.9963 |

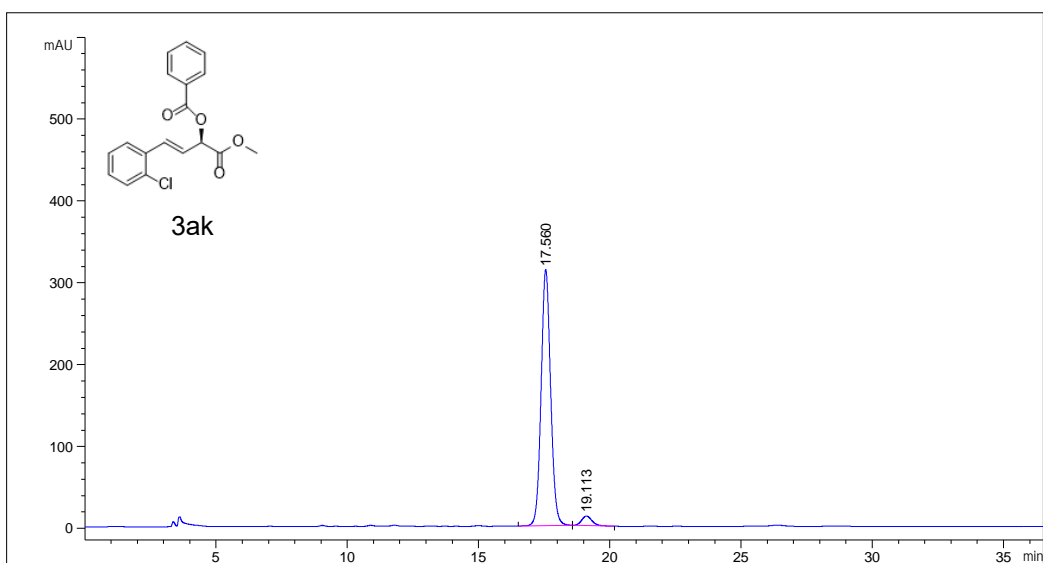

| # | [min]  | [min] | [mAU*s] | [mAU]      | %         |         |
|---|--------|-------|---------|------------|-----------|---------|
| 1 | 17.560 | BB    | 0.3865  | 7873.25342 | 312.92920 | 96.0693 |
| 2 | 19.113 | BB    | 0.4229  | 322.13931  | 11.71307  | 3.9307  |

Daicel Chiralpak IA column, n-hexane/i-PrOH=90/10, flow rate= 1ml/min, l= 225 nm

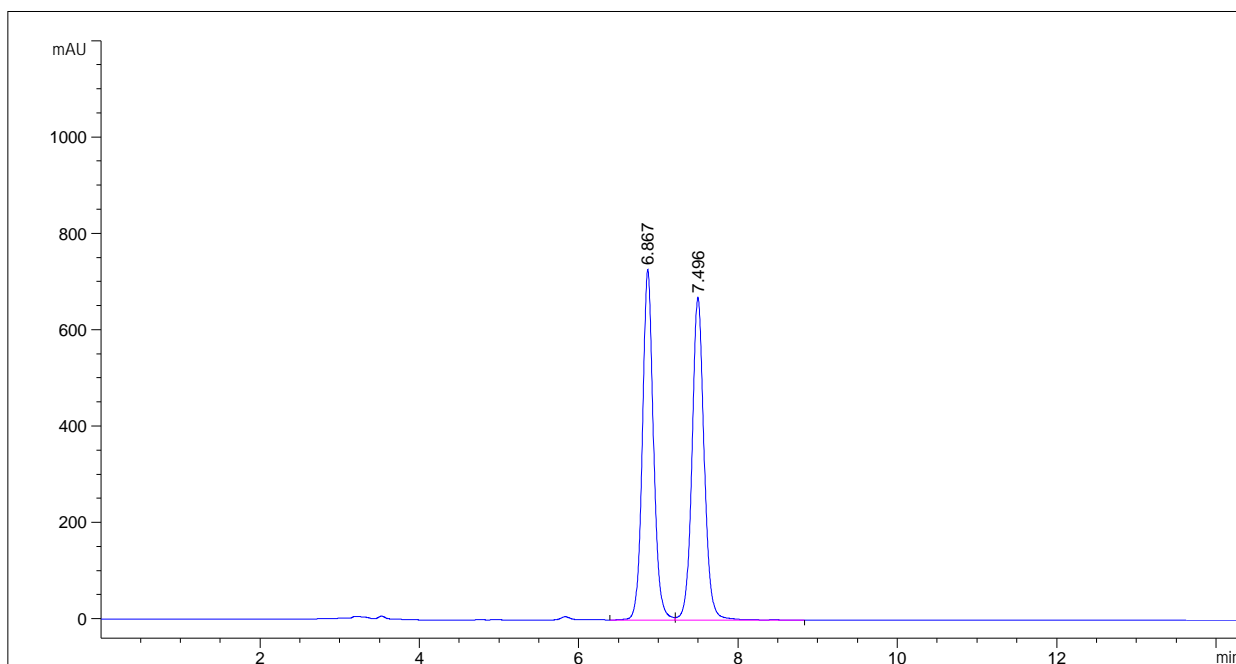

| # | [mi n] | [mi n] | [mAU*s] | [mAU]      | %         |         |
|---|--------|--------|---------|------------|-----------|---------|
| 1 | 6.867  | BV     | 0.1470  | 7040.90918 | 727.20612 | 49.8035 |
| 2 | 7.496  | W R    | 0.1606  | 7096.48096 | 669.72040 | 50.1965 |

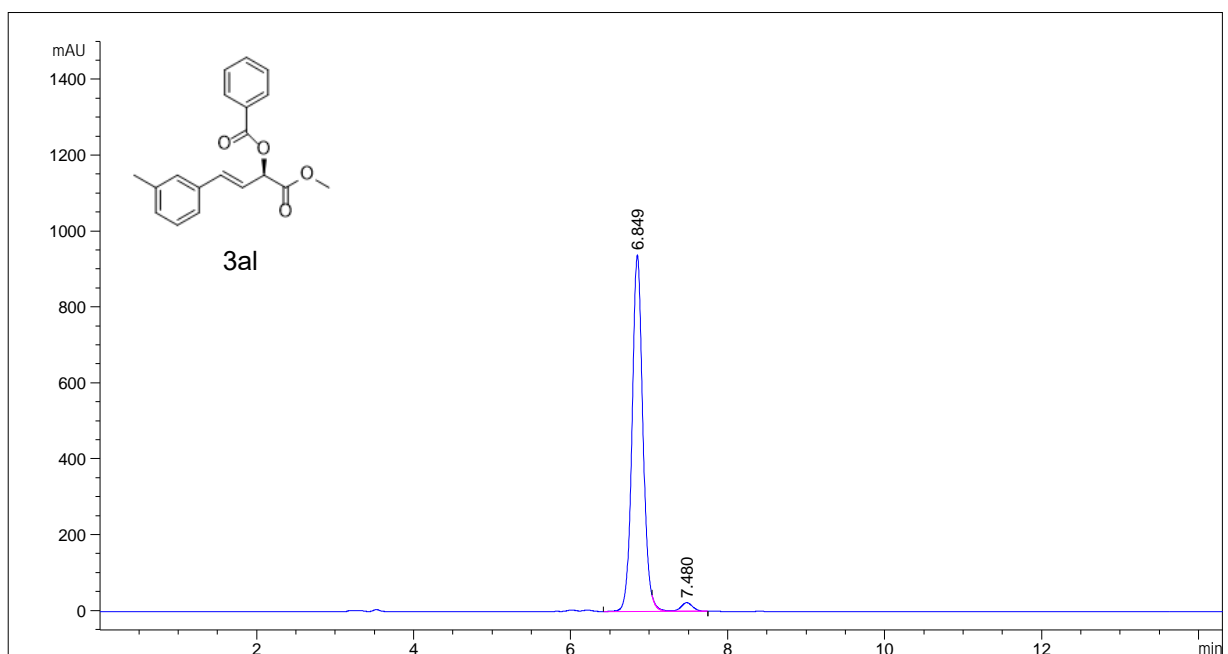

| # | [mi n] | [mi n] | [mAU*s] | [mAU]      | %         |         |
|---|--------|--------|---------|------------|-----------|---------|
| 1 | 6.849  | BV R   | 0.1463  | 9043.94824 | 939.79712 | 97.2482 |
| 2 | 7.480  | VB E   | 0.1678  | 255.90981  | 22.82184  | 2.7518  |



Daicel Chiralpak IC column, n-hexane/i-PrOH= 99/1, flow rate= 1ml/min, l= 225 nm

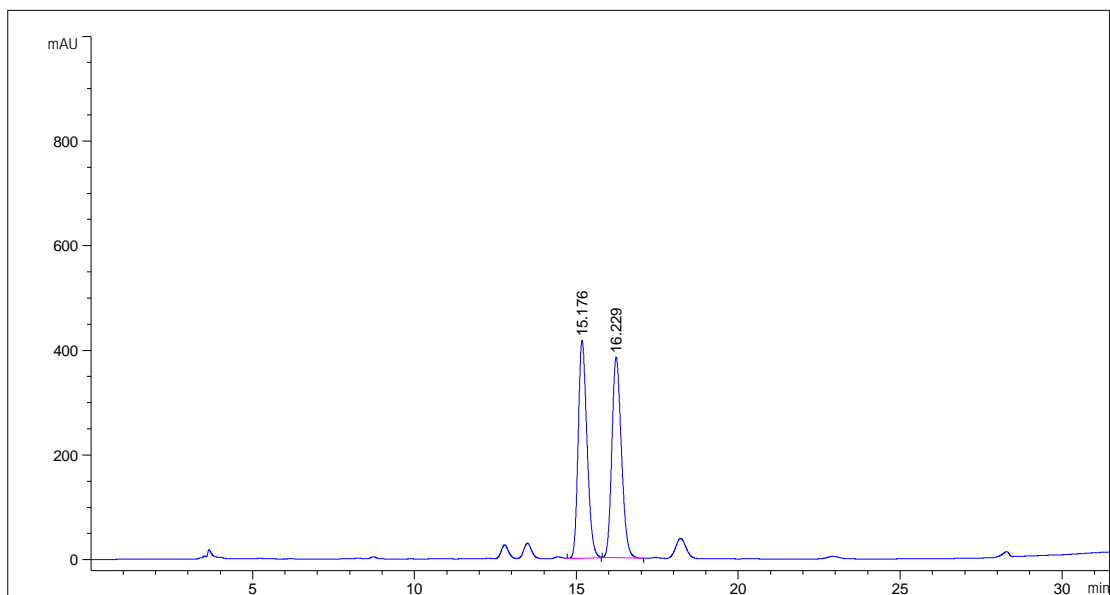

DYU\_ FYhH] aY HndY` K] Xh\` . . . 5fYU` . . . . <Y] [\h` . . . . 5fYU

| # | [mi n]    | [mi n] | [mAU*s]    | [mAU]     | %       |
|---|-----------|--------|------------|-----------|---------|
| 1 | 15.176 MM | 0.3158 | 7889.67188 | 416.38354 | 50.1132 |
| 2 | 16.229 MM | 0.3417 | 7854.03857 | 383.06940 | 49.8868 |

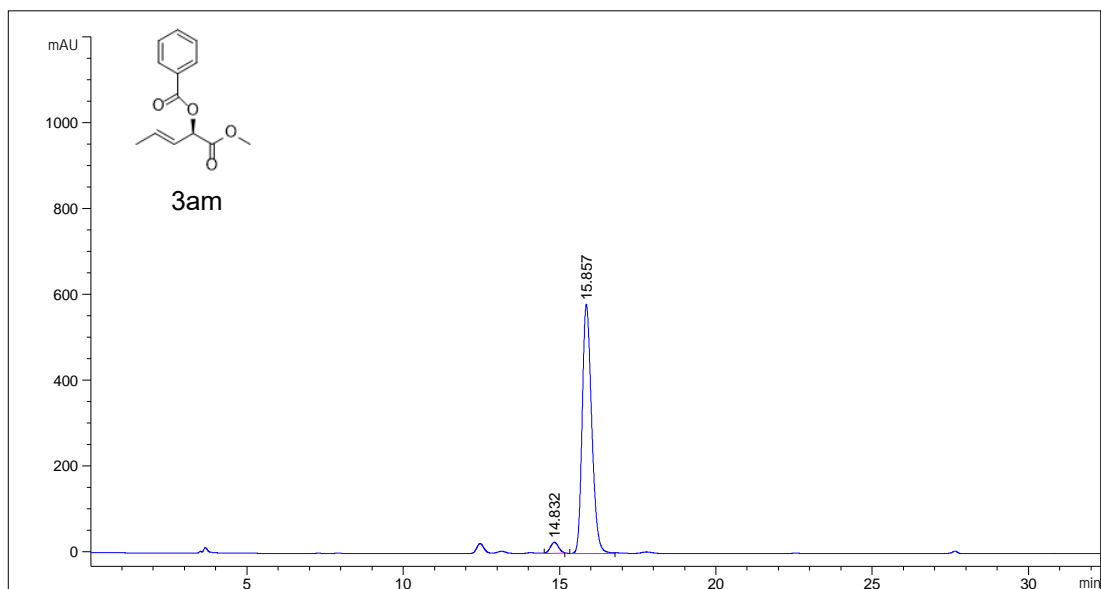

DYU\_ FYhH] aY HndY` K] Xh\` . . . 5fYU` . . . . <Y] [\h` . . . . 5fYU

| # | [mi n]    | [mi n] | [mAU*s]   | [mAU]     | %       |
|---|-----------|--------|-----------|-----------|---------|
| 1 | 14.832 MM | 0.3075 | 480.66867 | 26.05021  | 3.7653  |
| 2 | 15.857 MM | 0.3525 | 1.22849e4 | 580.78302 | 96.2347 |

Daicel Chiralpak IC column, n-hexane/i-PrOH= 99/1, flow rate= 1ml/min, l= 225 nm

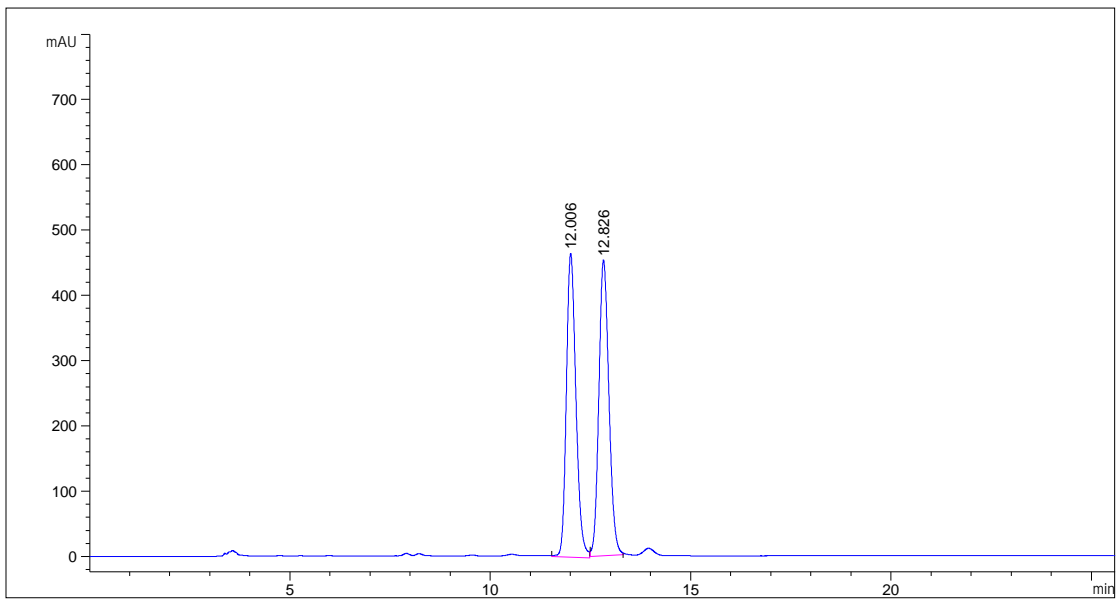

| # | [min]  | [min] | [mAU*s]           | [mAU]     | %       |
|---|--------|-------|-------------------|-----------|---------|
| 1 | 12.006 | MM    | 0.2766 7728.74854 | 465.72897 | 49.4401 |
| 2 | 12.826 | MM    | 0.2909 7903.79980 | 452.78943 | 50.5599 |

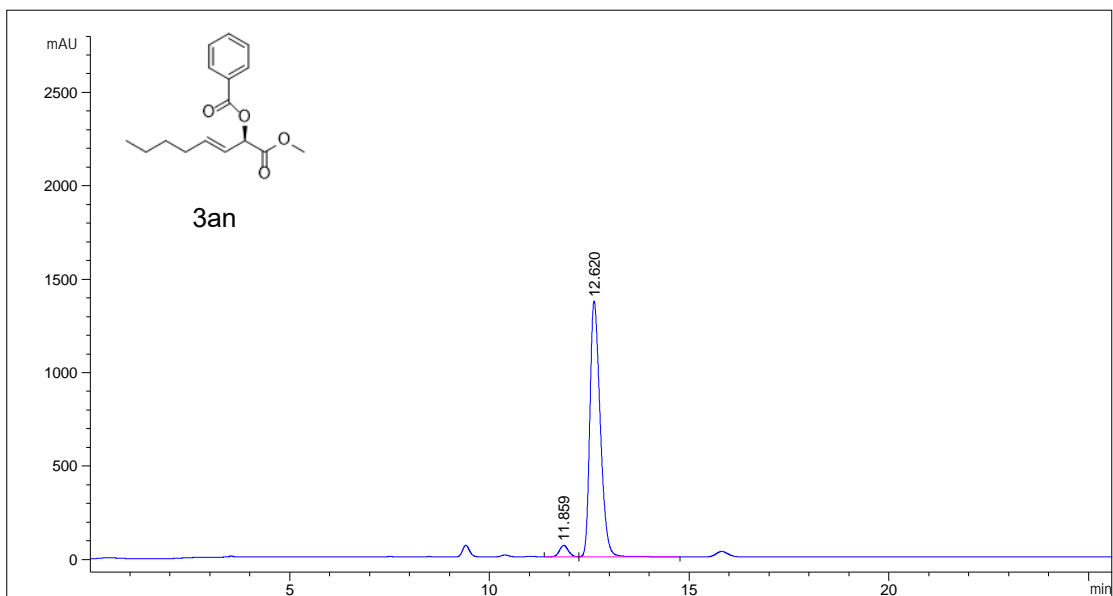

| # | [min]  | [min] | [mAU*s]          | [mAU]      | %       |
|---|--------|-------|------------------|------------|---------|
| 1 | 11.859 | BV    | 0.2405 962.83429 | 61.54699   | 3.7577  |
| 2 | 12.620 | VV R  | 0.2765 2.46604e4 | 1369.83203 | 96.2423 |

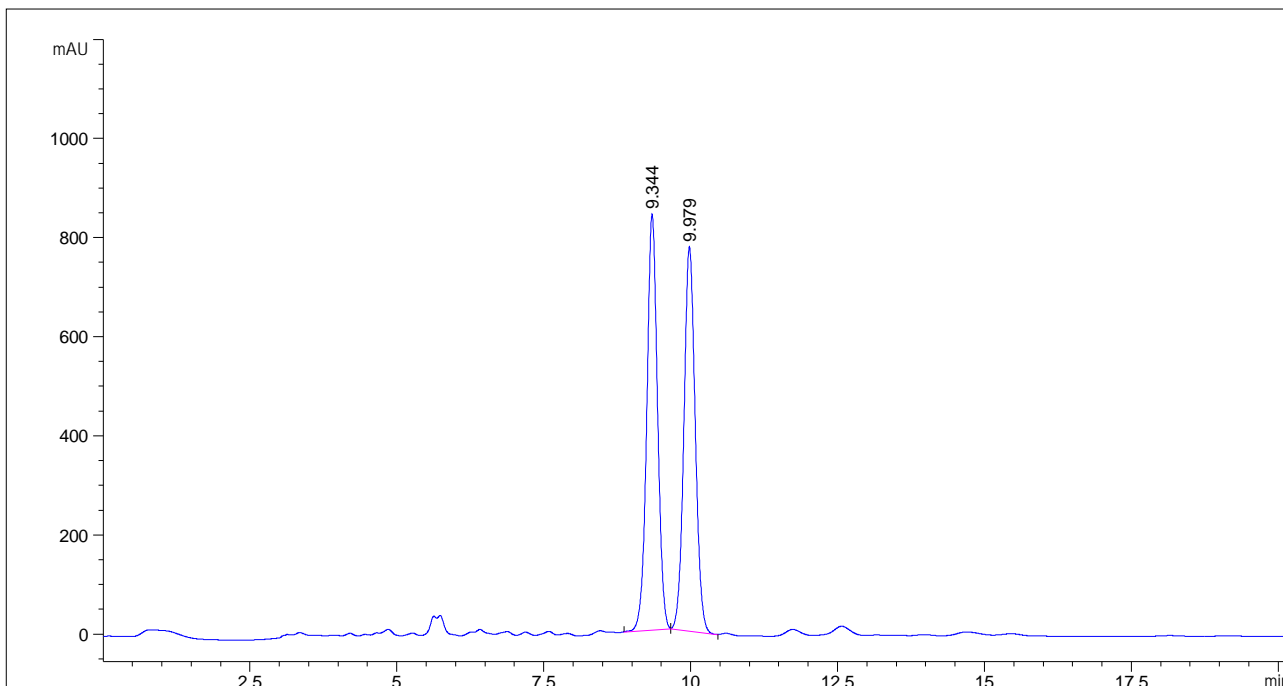

| # | [min] | [min] | [mAU*s] | [mAU]     | %         |         |
|---|-------|-------|---------|-----------|-----------|---------|
| 1 | 9.344 | MM    | 0.2120  | 1.06867e4 | 840.12842 | 50.6959 |
| 2 | 9.979 | MM    | 0.2231  | 1.03933e4 | 776.31976 | 49.3041 |

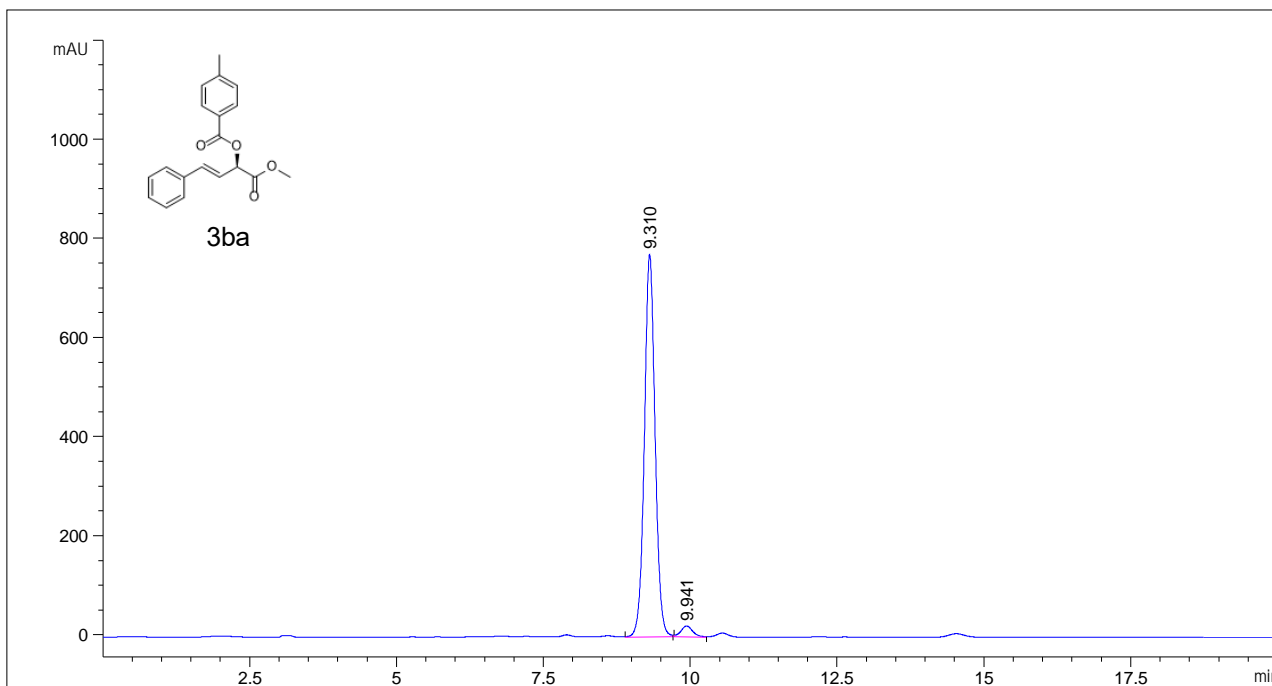

| # | [min] | [min] | [mAU*s] | [mAU]      | %         |         |
|---|-------|-------|---------|------------|-----------|---------|
| 1 | 9.310 | MM    | 0.2108  | 9765.87695 | 772.13281 | 96.8915 |
| 2 | 9.941 | MM    | 0.2364  | 313.31094  | 22.08788  | 3.1085  |

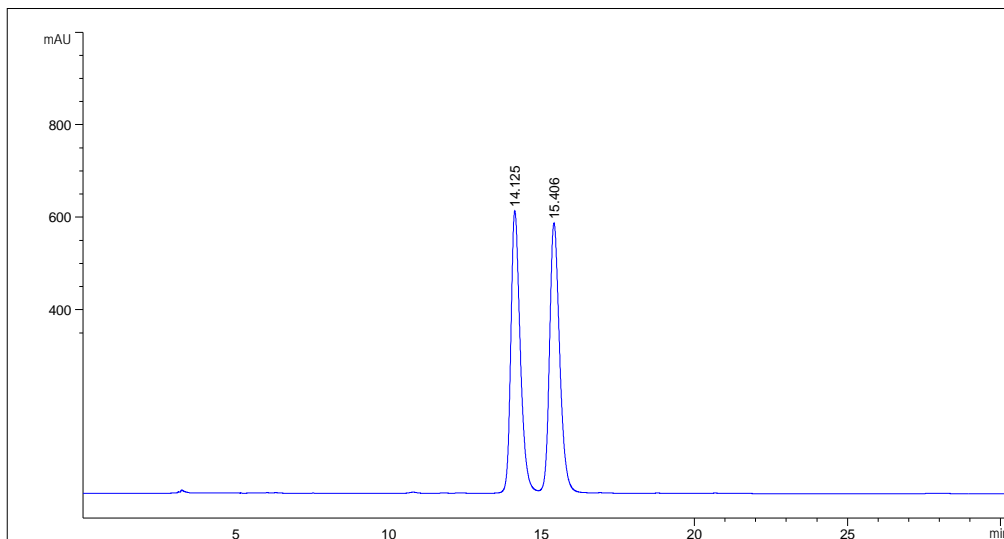

DYak FYhH] aY HdY` K] Xh\` . . . 5fYU` . . . . <Y] [\h` . . . . 5fYU

| # | [min]  | [min] | [mAU*s] | [mAU]     | %         |         |
|---|--------|-------|---------|-----------|-----------|---------|
| 1 | 14.125 | BV    | 0.3244  | 1.30535e4 | 610.53583 | 49.3461 |
| 2 | 15.406 | VB    | 0.3508  | 1.33994e4 | 583.71381 | 50.6539 |

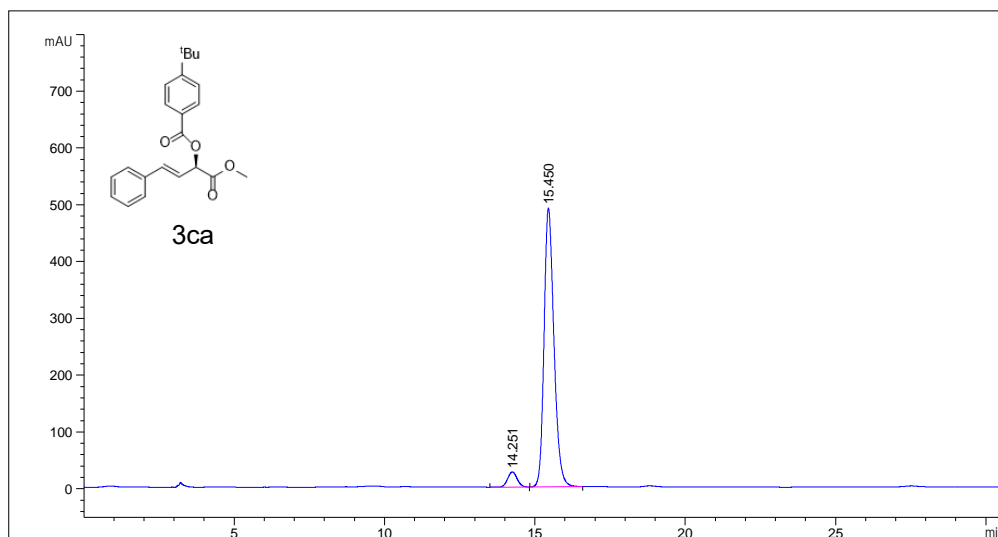

DYU` FYhH] aY HdY` K] Xh\` . . . 5fYU` . . . . <Y] [\h` . . . . 5fYU

| # | [min]  | [min] | [mAU*s] | [mAU]     | %         |         |
|---|--------|-------|---------|-----------|-----------|---------|
| 1 | 14.251 | BB    | 0.3417  | 589.16113 | 26.87877  | 4.9921  |
| 2 | 15.450 | BB    | 0.3506  | 1.12128e4 | 490.67963 | 95.0079 |

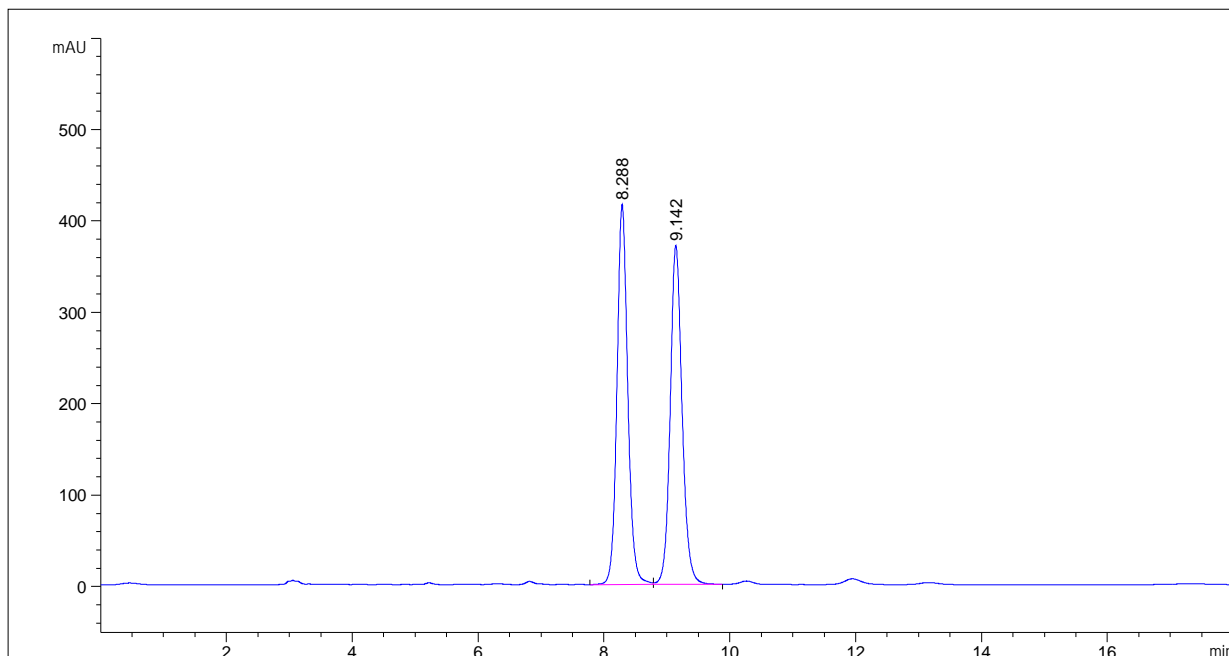

| # | [min] | [min] | [mAU*s] | [mAU]      | %         |         |
|---|-------|-------|---------|------------|-----------|---------|
| 1 | 8.288 | BV    | 0.1812  | 4960.36670 | 415.87848 | 50.4609 |
| 2 | 9.142 | VB    | 0.1991  | 4869.75146 | 371.12924 | 49.5391 |

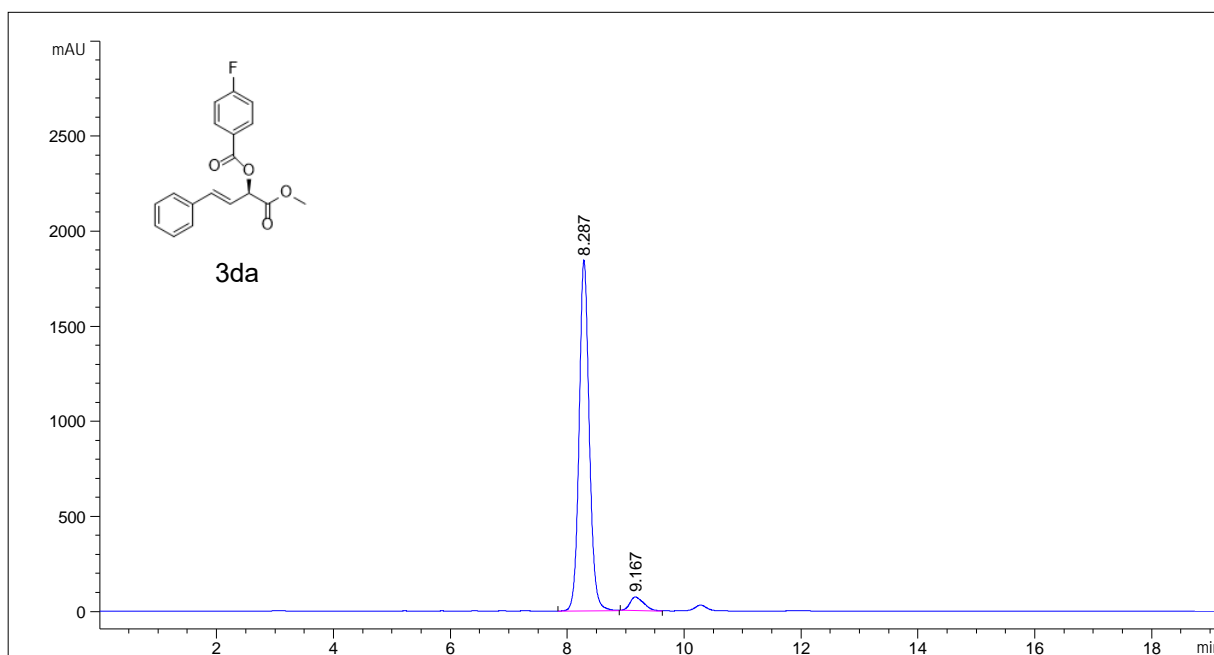

| # | [min] | [min] | [mAU*s] | [mAU]      | %          |         |
|---|-------|-------|---------|------------|------------|---------|
| 1 | 8.287 | MM    | 0.2006  | 2.22019e4  | 1844.85913 | 94.9465 |
| 2 | 9.167 | MM    | 0.2745  | 1181.68298 | 71.75167   | 5.0535  |

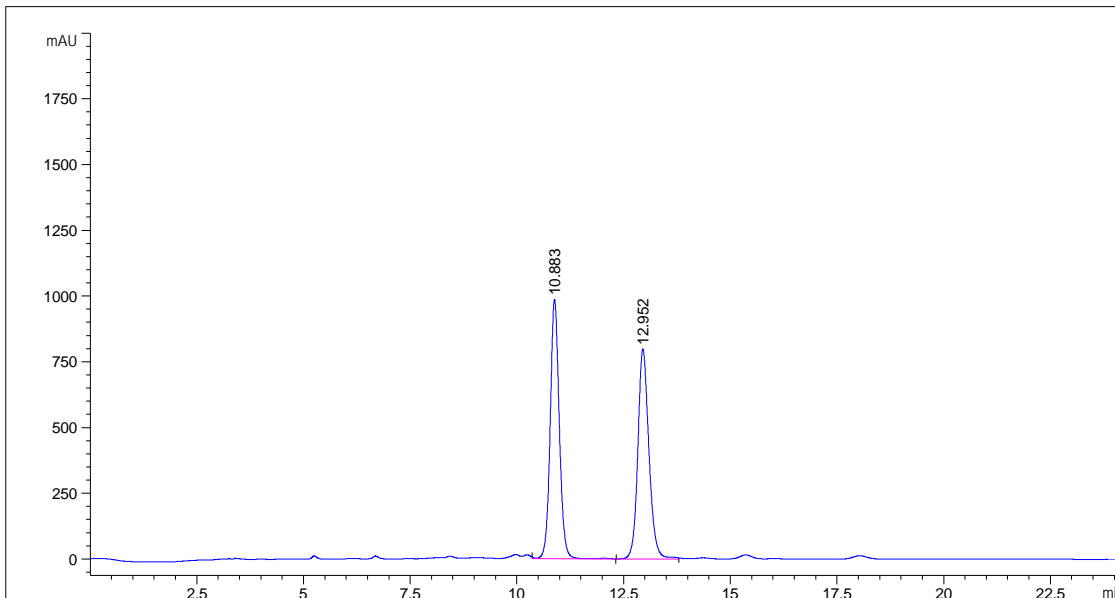

| # | [min]  | [min] | [mAU*s] | [mAU]     | %         |         |
|---|--------|-------|---------|-----------|-----------|---------|
| 1 | 10.883 | FM    | 0.2456  | 1.45302e4 | 985.86926 | 50.2693 |
| 2 | 12.952 | MF    | 0.2999  | 1.43746e4 | 798.76099 | 49.7307 |

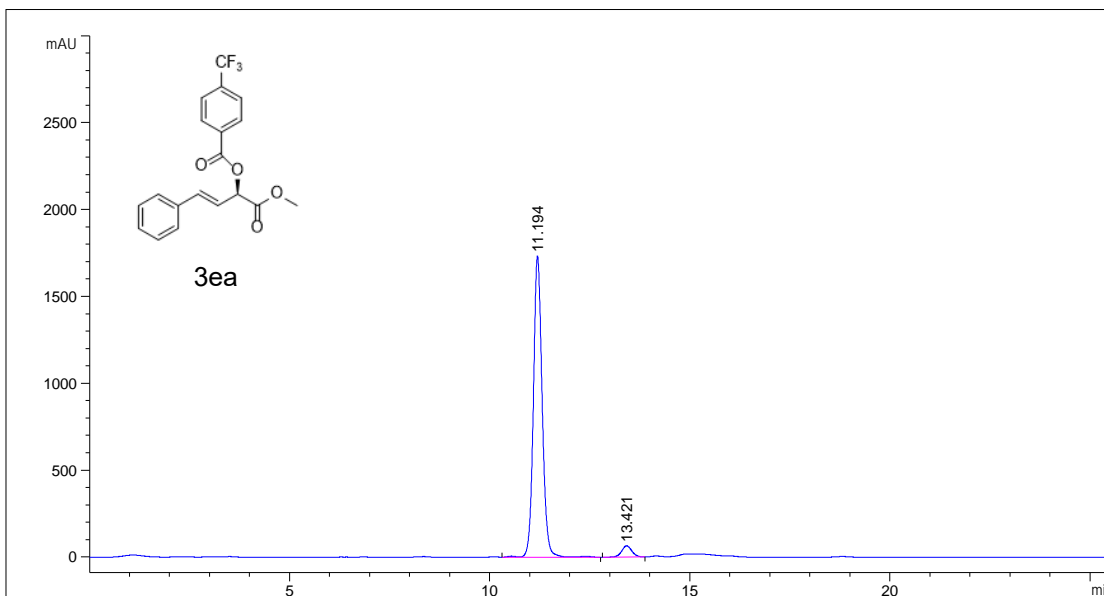

| # | [min]  | [min] | [mAU*s] | [mAU]      | %          |         |
|---|--------|-------|---------|------------|------------|---------|
| 1 | 11.194 | VV R  | 0.2306  | 2.64092e4  | 1733.35840 | 95.8629 |
| 2 | 13.421 | BB    | 0.2719  | 1139.73499 | 64.27171   | 4.1371  |

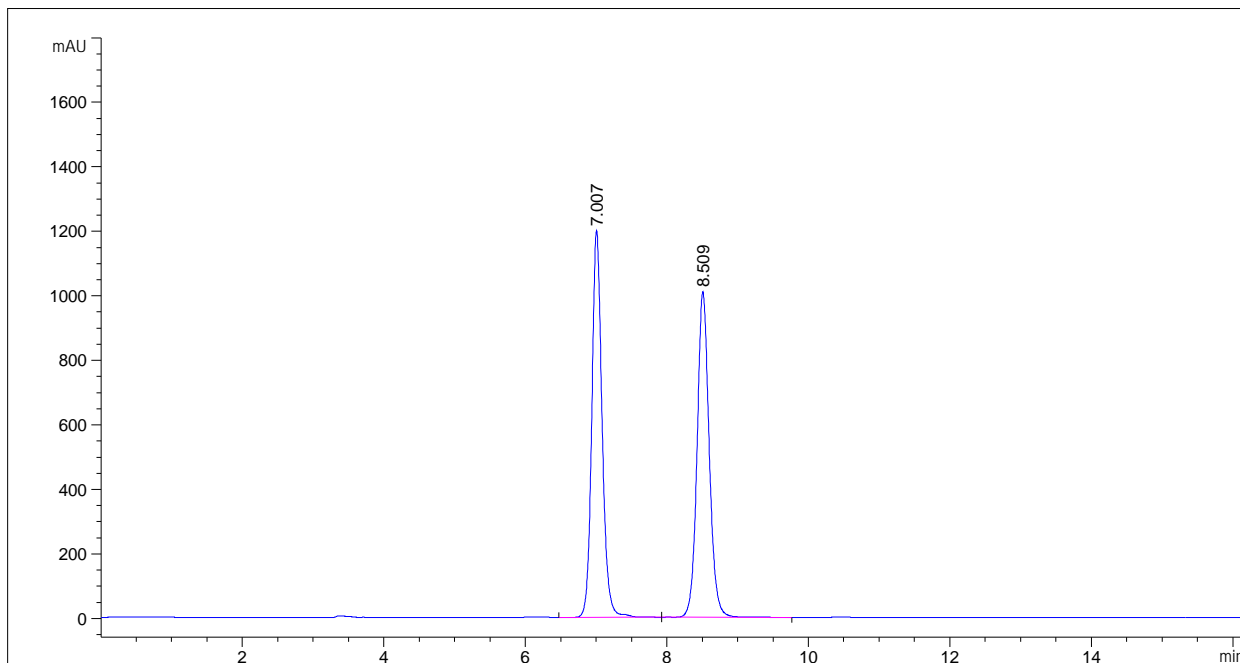

| # | [min] | [min] | [mAU*s] | [mAU]     | %          |         |
|---|-------|-------|---------|-----------|------------|---------|
| 1 | 7.007 | VB R  | 0.1538  | 1.20977e4 | 1198.19812 | 50.1825 |
| 2 | 8.509 | VV R  | 0.1808  | 1.20097e4 | 1009.10419 | 49.8175 |

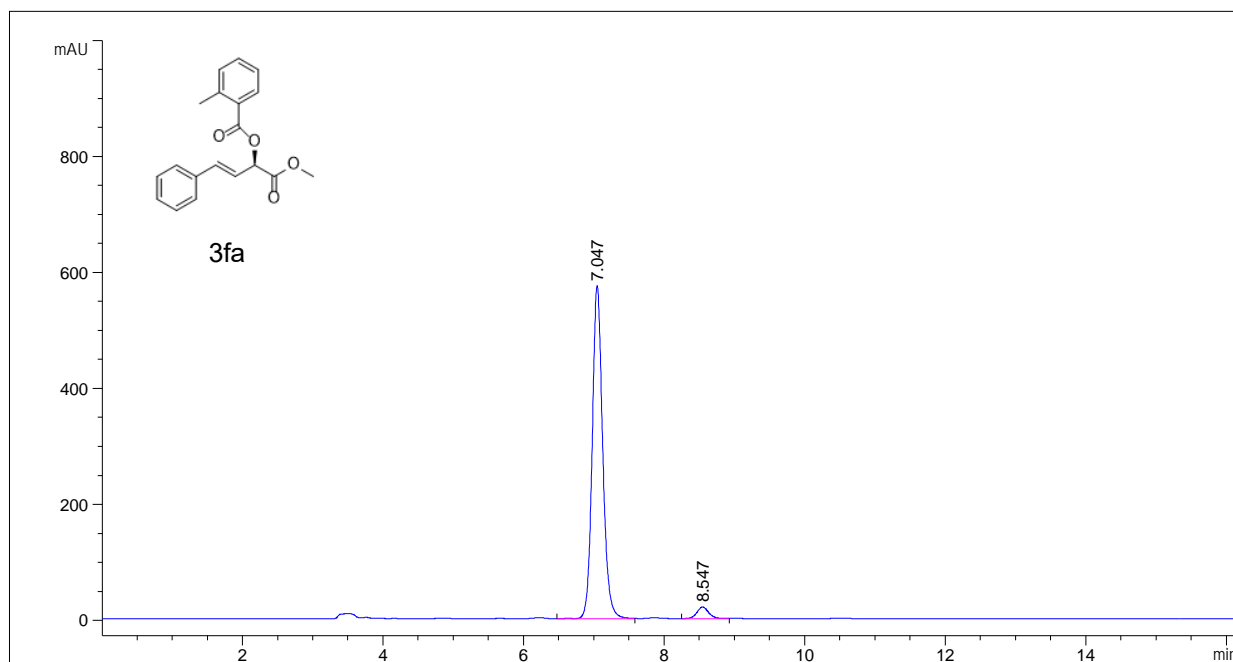

| # | [min] | [min] | [mAU*s] | [mAU]      | %         |         |
|---|-------|-------|---------|------------|-----------|---------|
| 1 | 7.047 | MF    | 0.1727  | 5946.88379 | 573.77856 | 96.1410 |
| 2 | 8.547 | FM    | 0.1988  | 238.70164  | 20.01125  | 3.8590  |

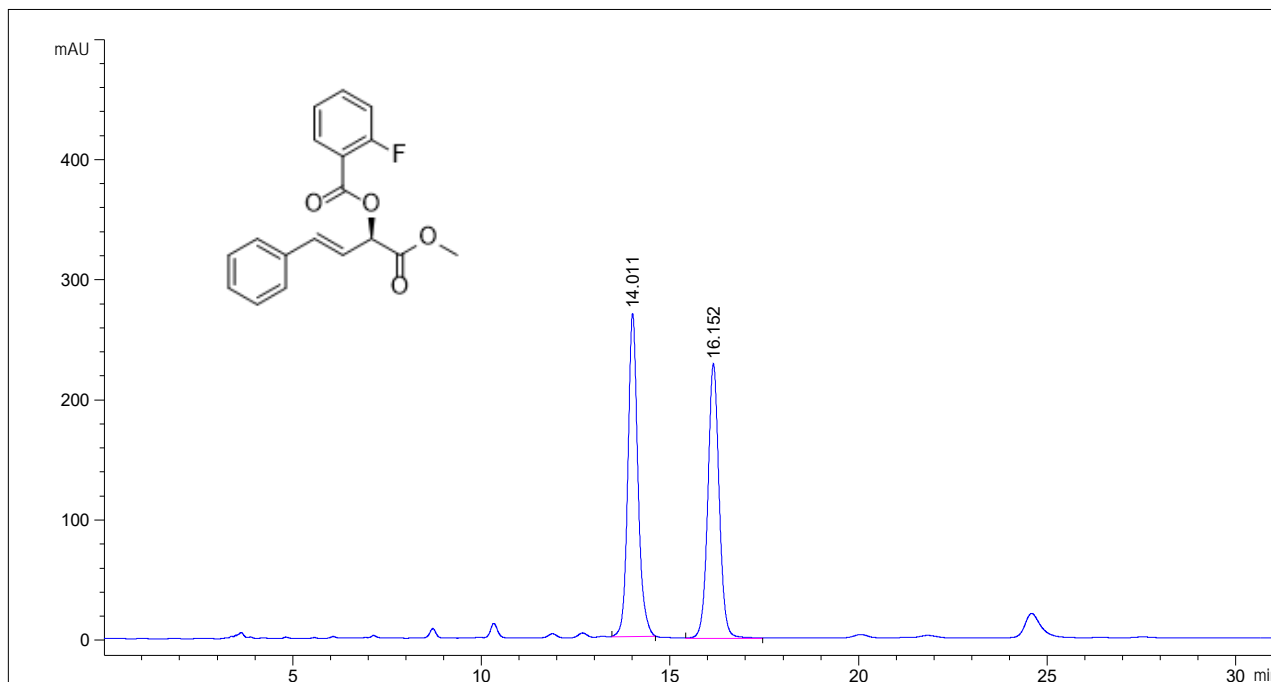

| # | [min]  | [min] | [mAU*s] | [mAU]      | %         |         |
|---|--------|-------|---------|------------|-----------|---------|
| 1 | 14.011 | MM    | 0.3079  | 4972.43066 | 269.12485 | 50.9101 |
| 2 | 16.152 | MM    | 0.3494  | 4794.65332 | 228.73445 | 49.0899 |

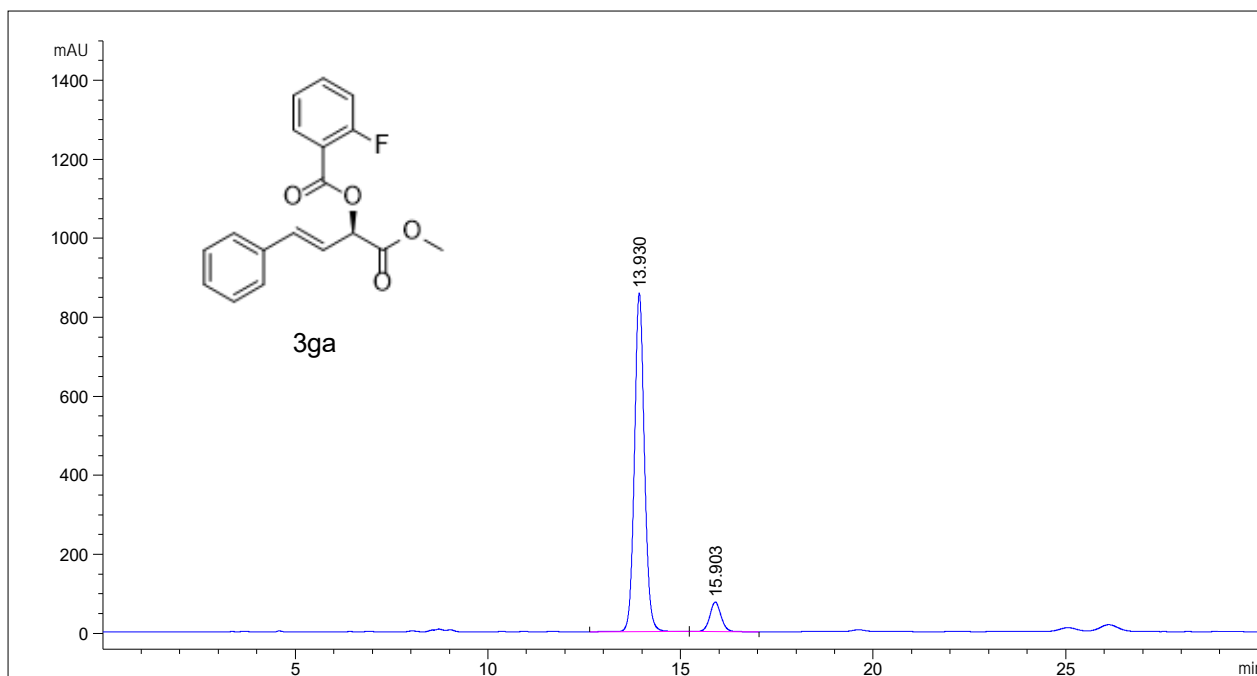

| # | [min]  | [min] | [mAU*s] | [mAU]      | %         |         |
|---|--------|-------|---------|------------|-----------|---------|
| 1 | 13.930 | VB R  | 0.2750  | 1.54345e4  | 857.63745 | 91.0444 |
| 2 | 15.903 | BB    | 0.3103  | 1518.21667 | 74.95245  | 8.9556  |



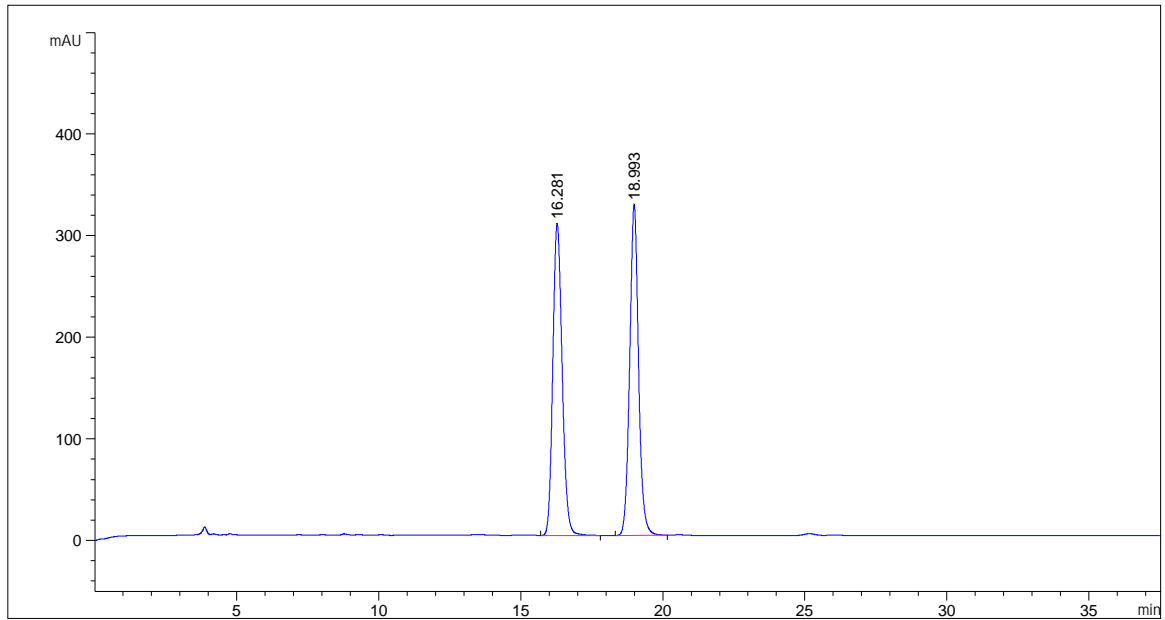

| # | [min]  | [min] | [mAU*s] | [mAU]      | %         |         |
|---|--------|-------|---------|------------|-----------|---------|
| 1 | 16.281 | BB    | 0.3531  | 7009.52490 | 307.31076 | 49.8348 |
| 2 | 18.993 | BB    | 0.3266  | 7055.99414 | 325.94910 | 50.1652 |

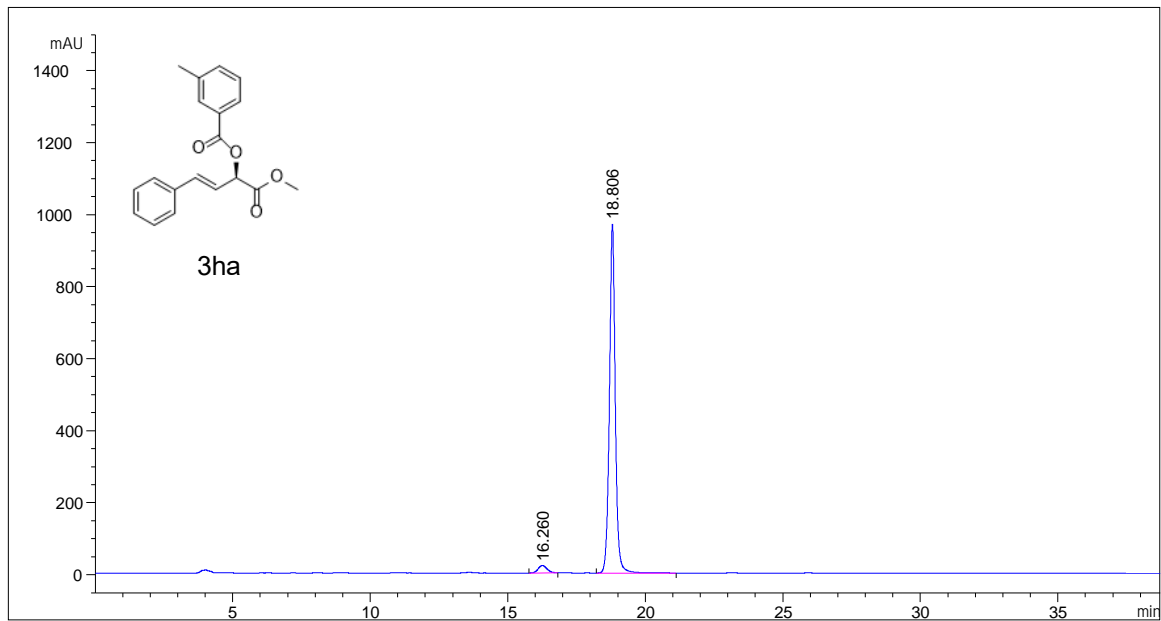

| # | [min]  | [min] | [mAU*s] | [mAU]     | %         |         |
|---|--------|-------|---------|-----------|-----------|---------|
| 1 | 16.260 | BB    | 0.3460  | 449.80698 | 20.26518  | 3.0360  |
| 2 | 18.806 | BB    | 0.2200  | 1.43660e4 | 968.91638 | 96.9640 |

Daicel Chiralpak IA column, n-hexane/i-PrOH= 90/10, flow rate= 1ml/min, l= 225 nm

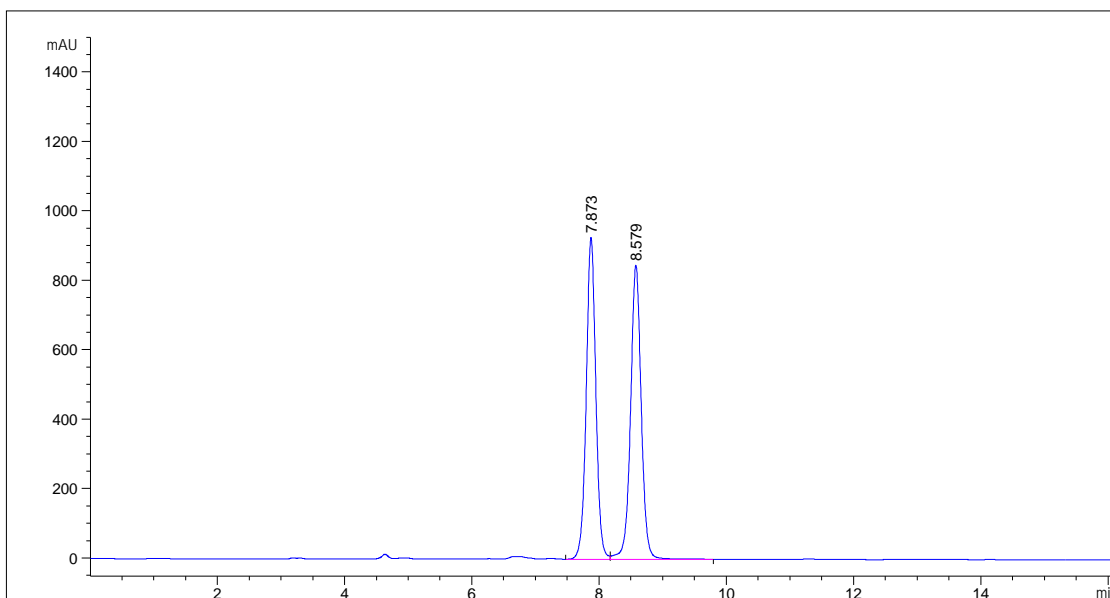

| # | [min]    | [min]  | [mAU*s]    | [mAU]     | %       |
|---|----------|--------|------------|-----------|---------|
| 1 | 7.873 BV | 0.1602 | 9705.61133 | 926.81873 | 49.5687 |
| 2 | 8.579 VB | 0.1771 | 9874.50684 | 846.54553 | 50.4313 |

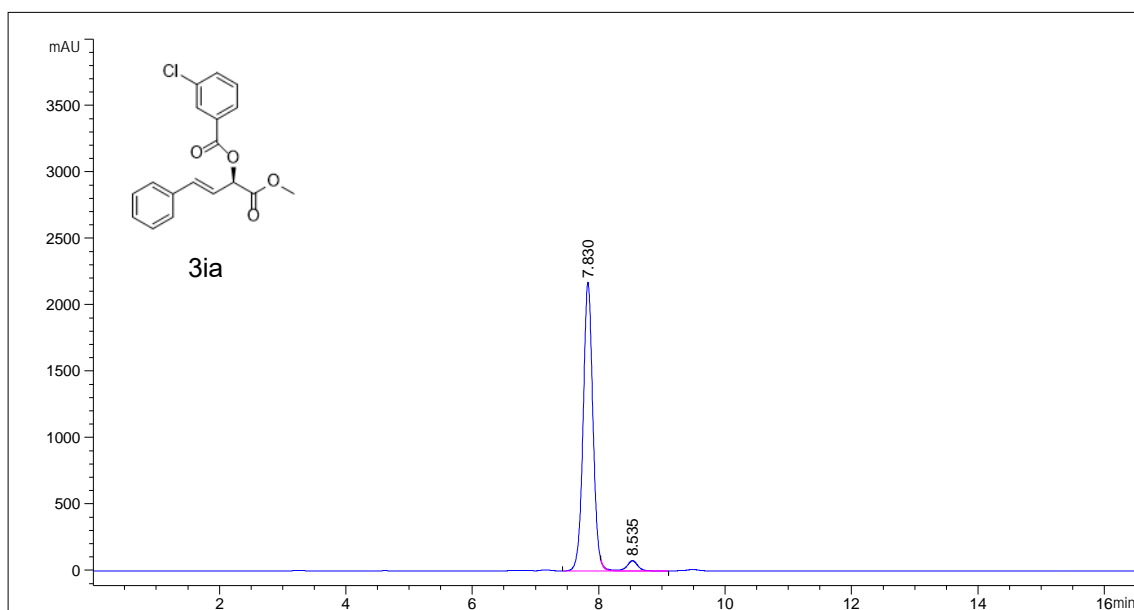

| # | [min]      | [min]  | [mAU*s]   | [mAU]      | %       |
|---|------------|--------|-----------|------------|---------|
| 1 | 7.830 BV R | 0.1643 | 2.33315e4 | 2173.08276 | 96.0707 |
| 2 | 8.535 VB E | 0.1858 | 954.25330 | 76.37509   | 3.9293  |

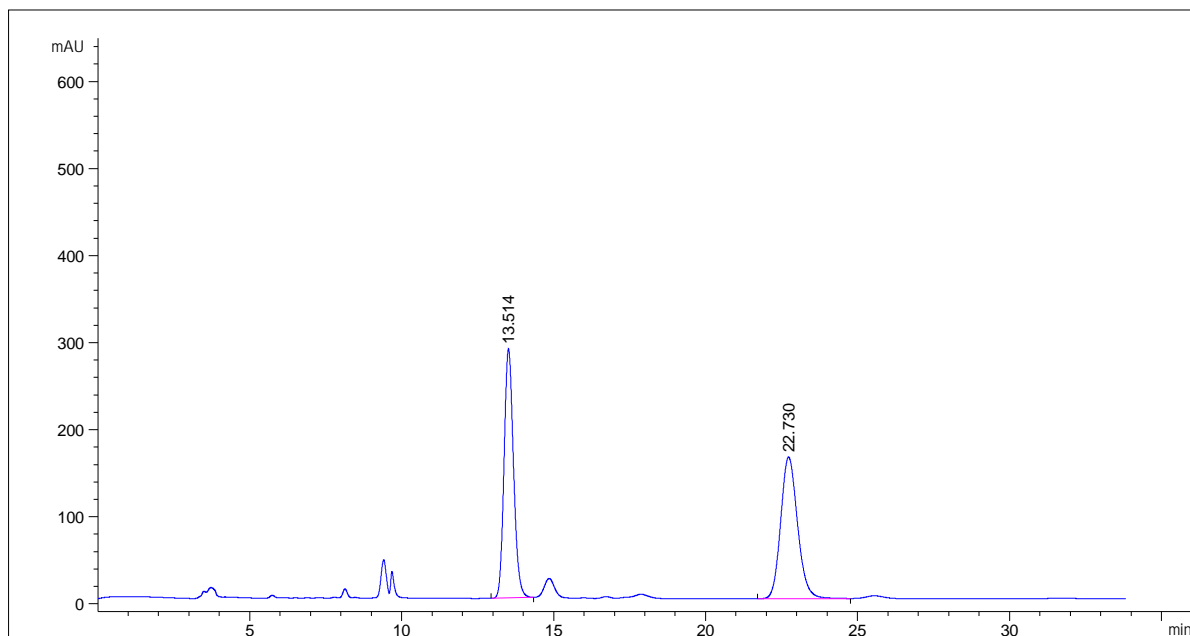

| # | [min]  | [min] | [mAU*s] | [mAU]      | %         |         |
|---|--------|-------|---------|------------|-----------|---------|
| 1 | 13.514 | BB    | 0.3326  | 6173.01855 | 286.22501 | 49.6608 |
| 2 | 22.730 | BB    | 0.5929  | 6257.34424 | 162.63890 | 50.3392 |

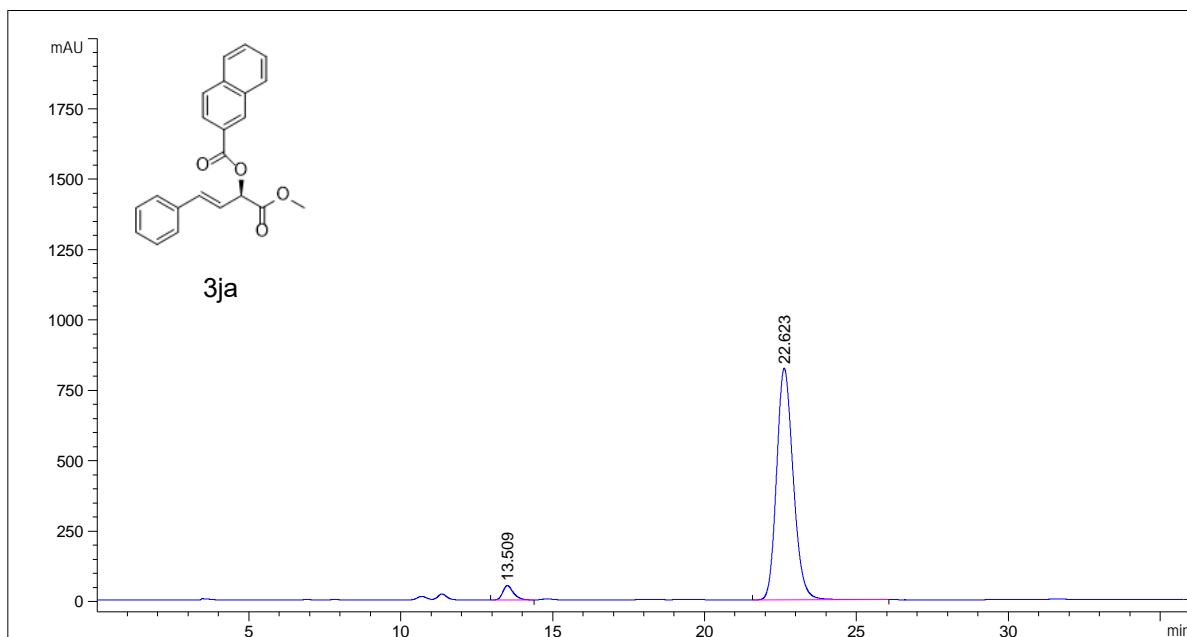

| # | [min]  | [min] | [mAU*s] | [mAU]      | %         |         |
|---|--------|-------|---------|------------|-----------|---------|
| 1 | 13.509 | BB    | 0.3636  | 1230.80688 | 51.18144  | 3.7847  |
| 2 | 22.623 | BB    | 0.5870  | 3.12897e4  | 822.13940 | 96.2153 |

Daicel Chiralpak IA column, n-hexane/i-PrOH= 90/10, flow rate= 1ml/min, l= 225 nm

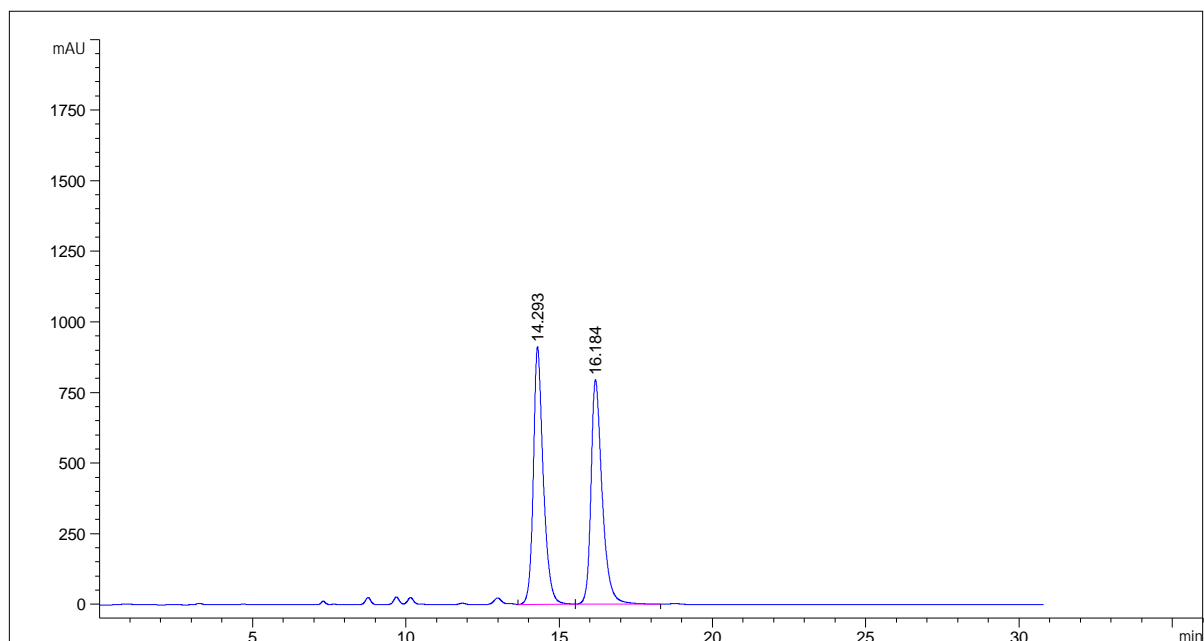

DYU\_ FYhH] aY HdY` K] Xh\` . . . 5fYU` . . . <Y] [\`h` . . . 5fYU

| # | [mi n] | [mi n] | [mAU*s] | [mAU]     | %         |         |
|---|--------|--------|---------|-----------|-----------|---------|
| 1 | 14.293 | BB     | 0.3296  | 2.04626e4 | 912.52448 | 50.3887 |
| 2 | 16.184 | BB     | 0.3789  | 2.01469e4 | 794.22131 | 49.6113 |

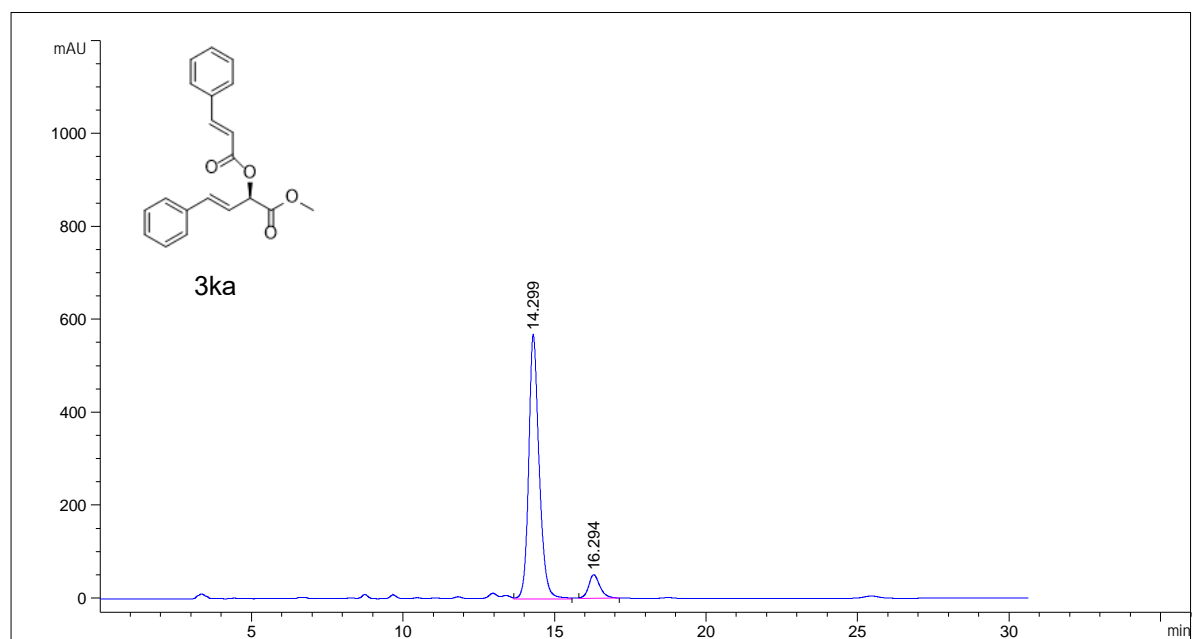

DYU\_ FYhH] aY HdY` K] Xh\` . . . 5fYU` . . . <Y] [\`h` . . . 5fYU

| # | [mi n] | [mi n] | [mAU*s] | [mAU]      | %         |         |
|---|--------|--------|---------|------------|-----------|---------|
| 1 | 14.299 | MM     | 0.3998  | 1.36575e4  | 569.30121 | 91.0963 |
| 2 | 16.294 | MM     | 0.4352  | 1334.88074 | 51.11976  | 8.9037  |

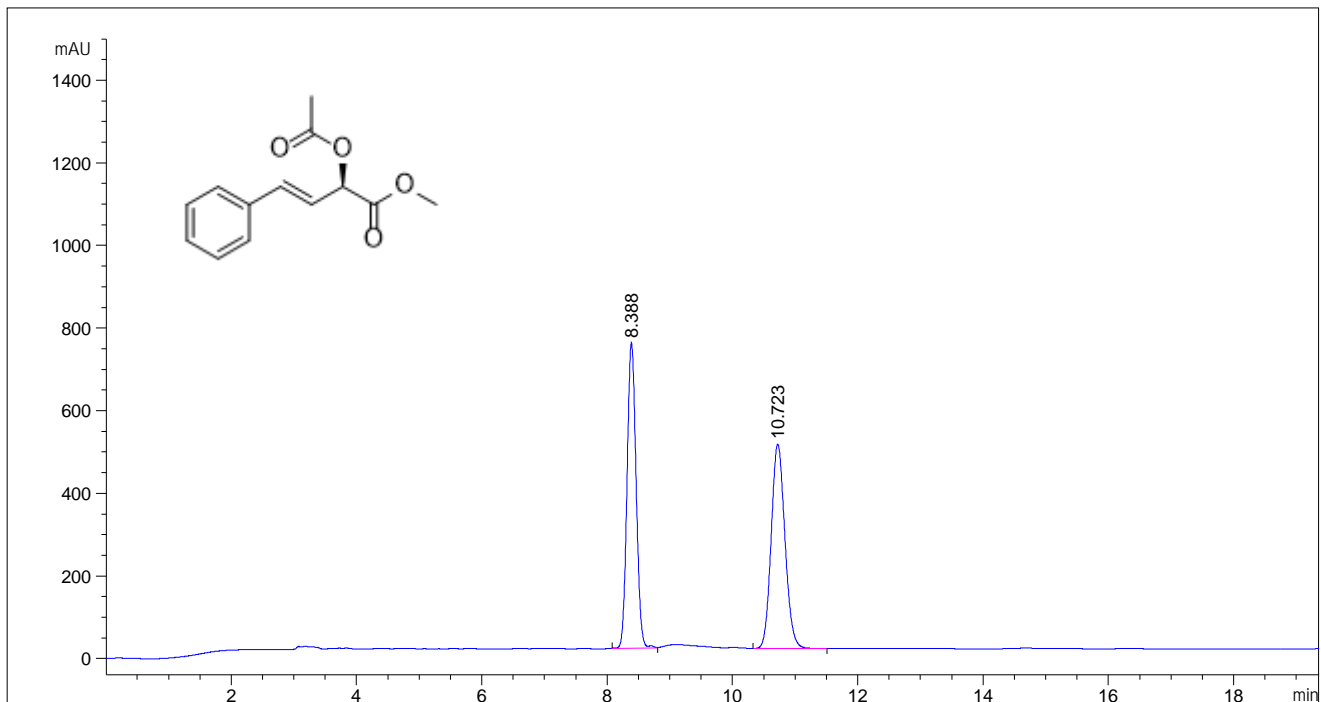

| # | [min]     | [min]  | [mAU*s]    | [mAU]     | %       |
|---|-----------|--------|------------|-----------|---------|
| 1 | 8.388 MM  | 0.1670 | 7412.86475 | 739.65570 | 49.5541 |
| 2 | 10.723 BB | 0.2369 | 7546.28271 | 494.93903 | 50.4459 |

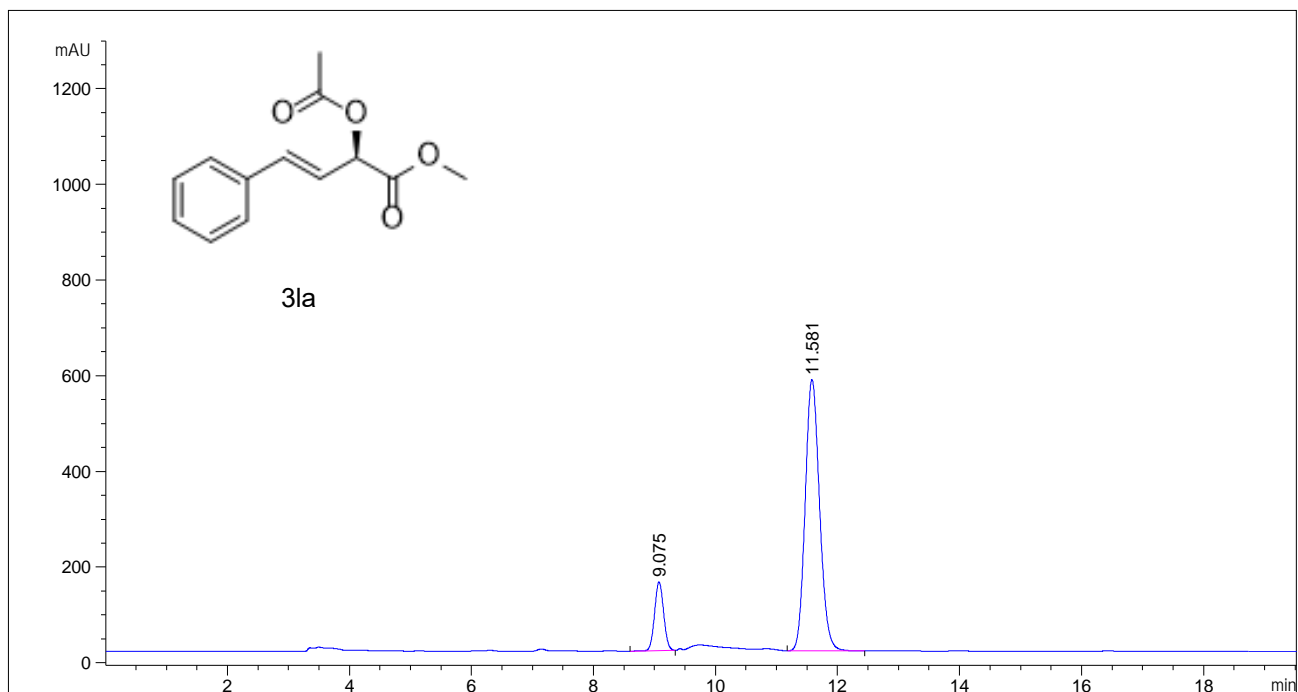

| # | [min]      | [min]  | [mAU*s]    | [mAU]     | %       |
|---|------------|--------|------------|-----------|---------|
| 1 | 9.075 VB R | 0.1606 | 1485.57422 | 143.66560 | 13.7737 |
| 2 | 11.581 BB  | 0.2542 | 9299.98145 | 567.40314 | 86.2263 |

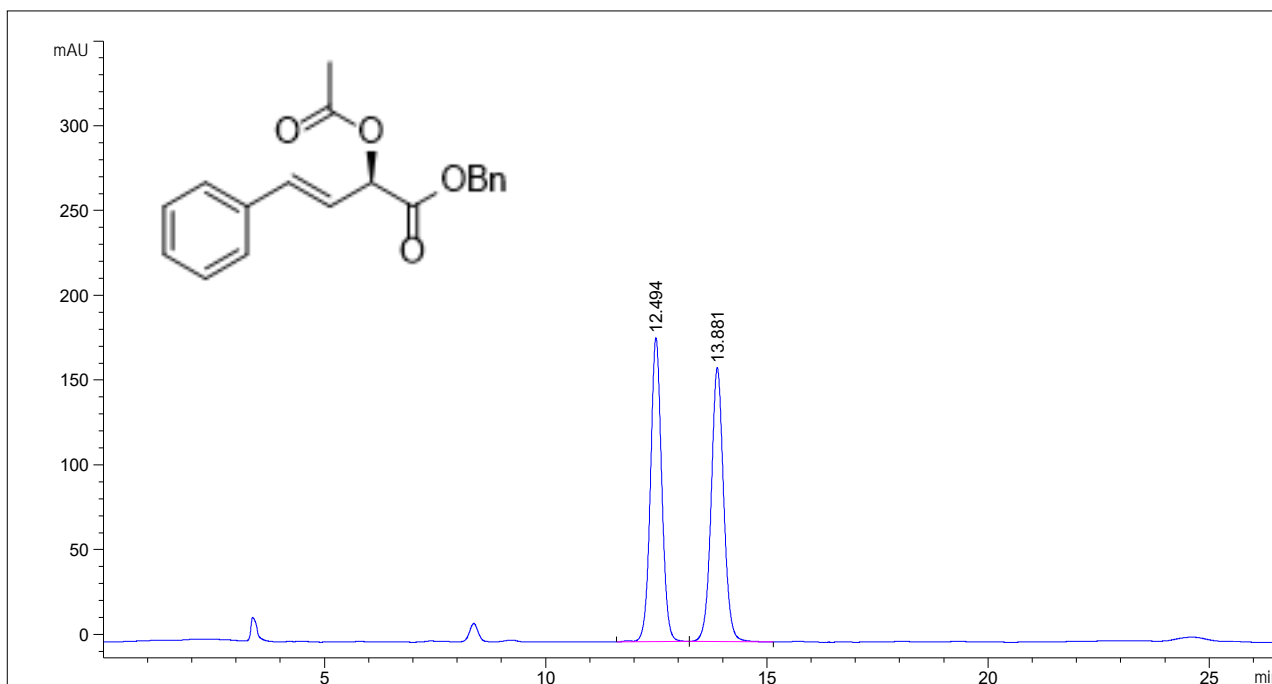

| # | [min]  | [min] | [mAU*s] | [mAU]      | %         |         |
|---|--------|-------|---------|------------|-----------|---------|
| 1 | 12.494 | VB R  | 0.2696  | 3157.61230 | 179.17632 | 49.8742 |
| 2 | 13.881 | BB    | 0.2990  | 3173.54077 | 161.66350 | 50.1258 |

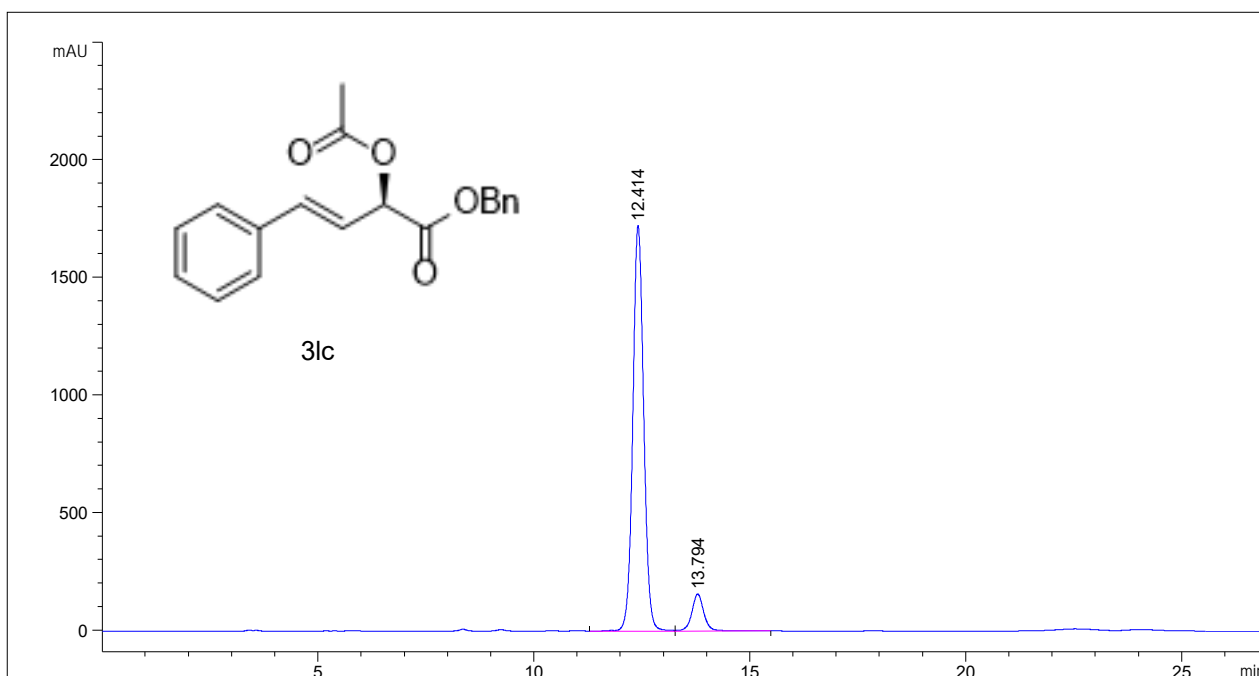

| # | [min]  | [min] | [mAU*s] | [mAU]      | %          |         |
|---|--------|-------|---------|------------|------------|---------|
| 1 | 12.414 | VV R  | 0.2700  | 3.01761e4  | 1724.10620 | 90.8638 |
| 2 | 13.794 | VB    | 0.2908  | 3034.16895 | 157.48047  | 9.1362  |

Daicel Chiralpak IA column, n-hexane/i-PrOH= 99/1, flow rate= 1ml/min, l= 225 nm

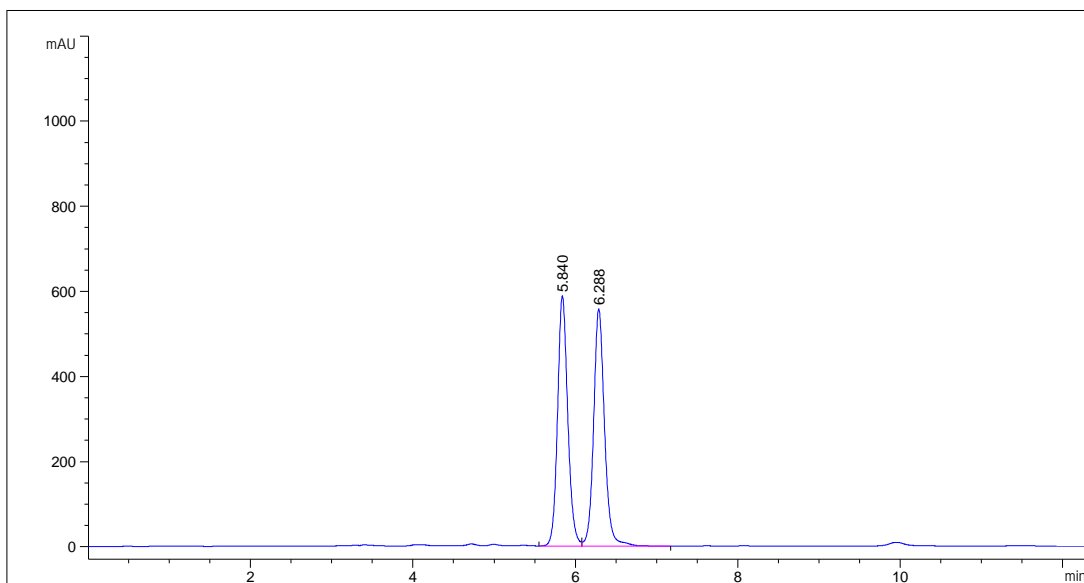

| # | [min]    | [min]  | [mAU*s]    | [mAU]     | %       |
|---|----------|--------|------------|-----------|---------|
| 1 | 5.840 BV | 0.1328 | 5124.74316 | 587.54614 | 49.7523 |
| 2 | 6.288 VB | 0.1404 | 5175.78223 | 557.17218 | 50.2477 |

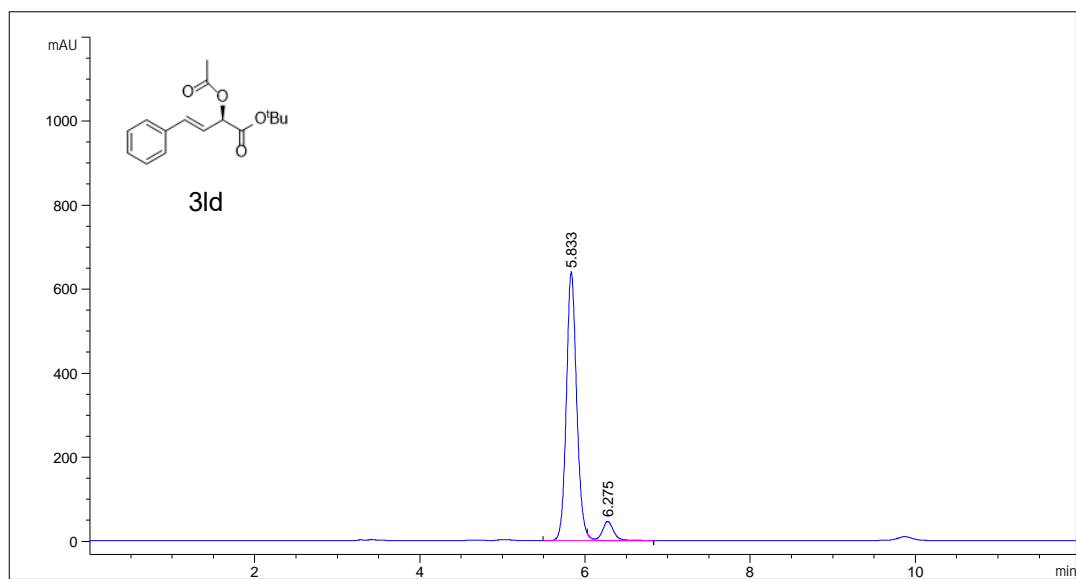

| # | [min]      | [min]  | [mAU*s]    | [mAU]     | %       |
|---|------------|--------|------------|-----------|---------|
| 1 | 5.833 BV R | 0.1327 | 5576.90283 | 639.57050 | 92.7884 |
| 2 | 6.275 VB E | 0.1421 | 433.44193  | 45.91528  | 7.2116  |

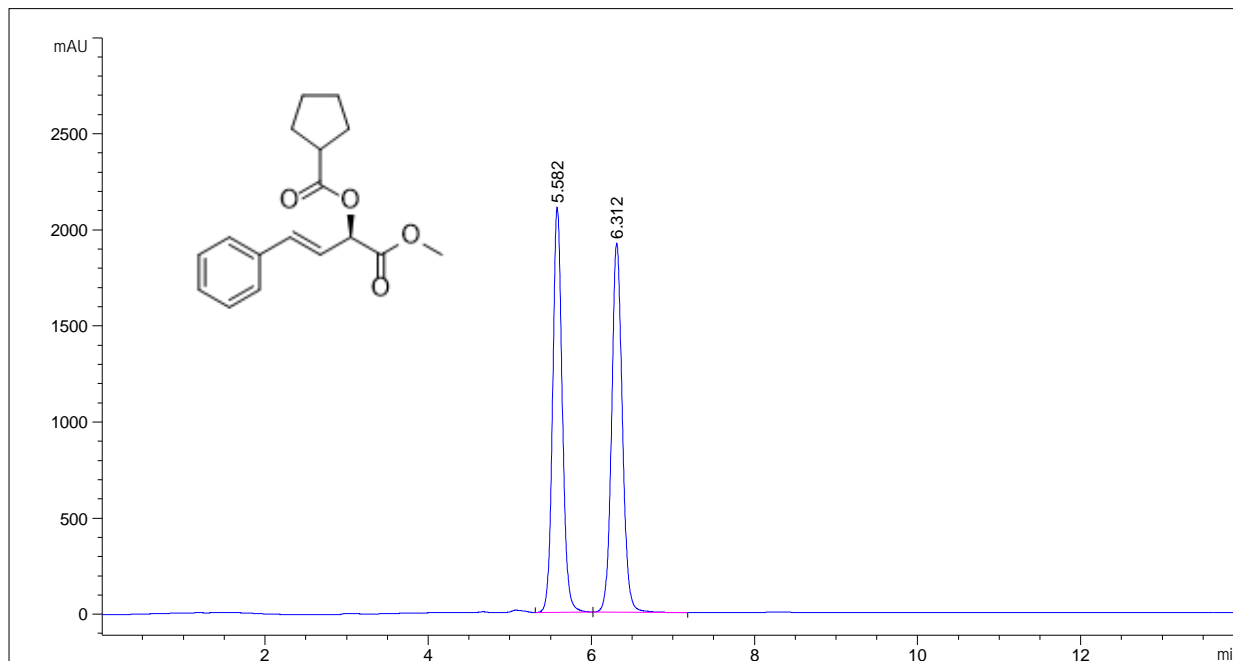

| # | [min] | [min] | [mAU*s] | [mAU]     | %          |         |
|---|-------|-------|---------|-----------|------------|---------|
| 1 | 5.582 | BB    | 0.1259  | 1.73125e4 | 2107.05591 | 49.6231 |
| 2 | 6.312 | BB    | 0.1409  | 1.75755e4 | 1918.53528 | 50.3769 |

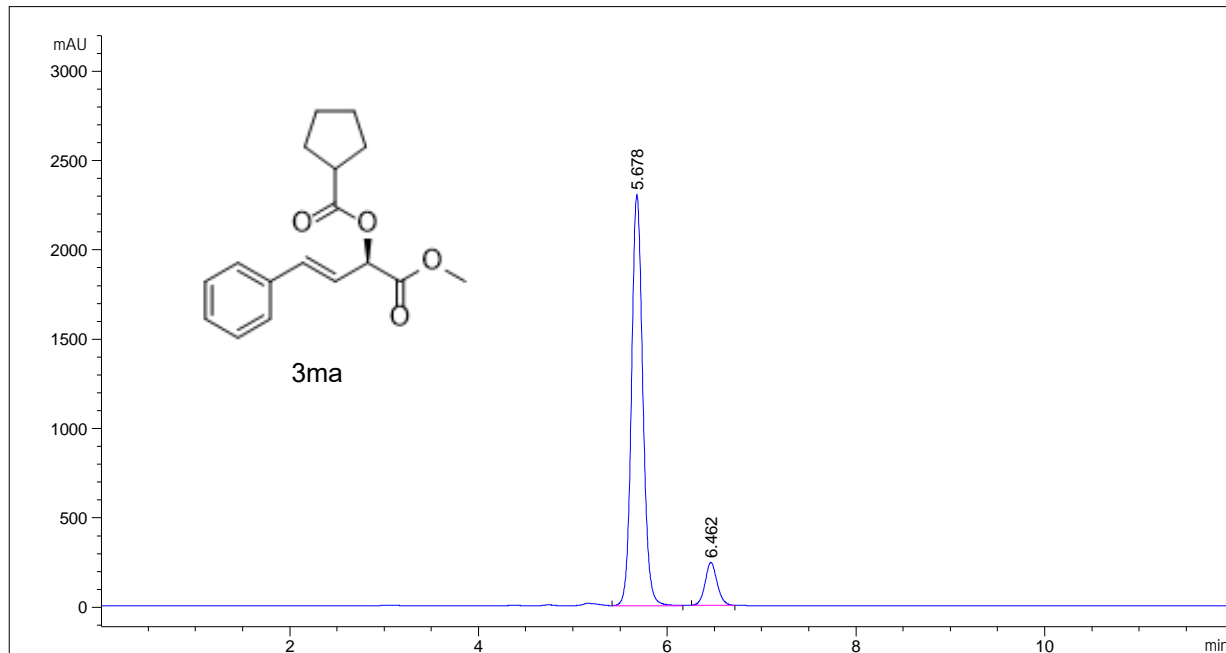

| # | [min] | [min] | [mAU*s] | [mAU]      | %          |         |
|---|-------|-------|---------|------------|------------|---------|
| 1 | 5.678 | MM    | 0.1392  | 1.92211e4  | 2301.38574 | 89.9934 |
| 2 | 6.462 | MM    | 0.1481  | 2137.24634 | 240.56883  | 10.0066 |



Daicel Chiralpak IA column, n-hexane/i-PrOH= 90/10, flow rate= 1ml/min, l= 225 nm

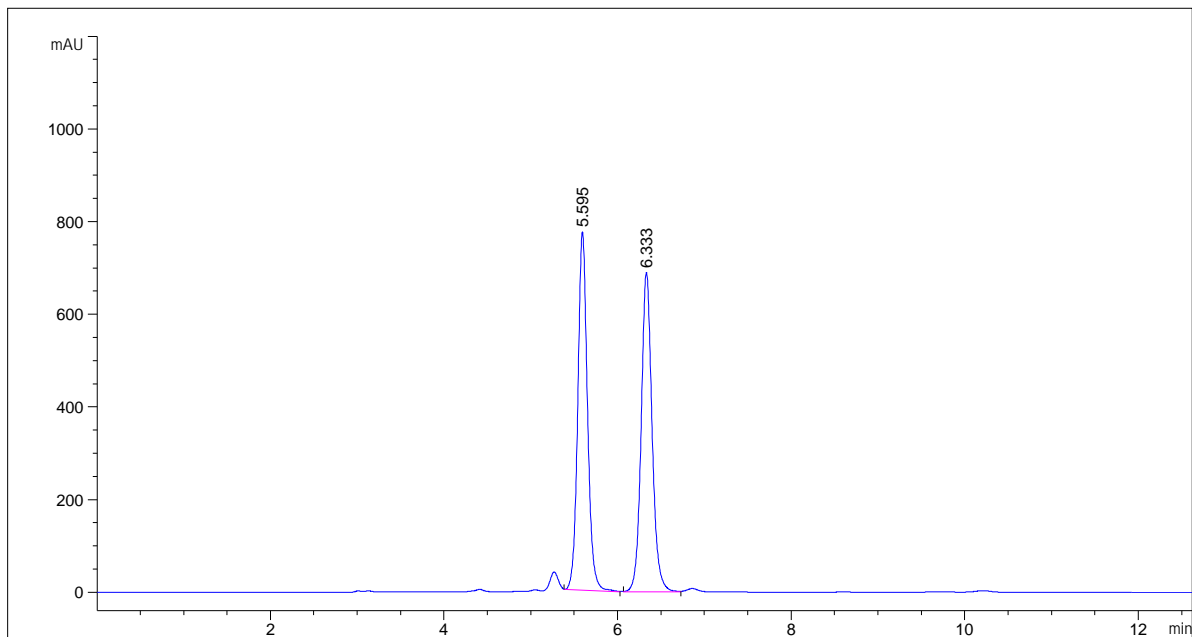

| # | [min]    | [min]  | [mAU*s]    | [mAU]     | %       |
|---|----------|--------|------------|-----------|---------|
| 1 | 5.595 MM | 0.1288 | 5979.01563 | 773.52271 | 49.8768 |
| 2 | 6.333 MM | 0.1454 | 6008.55371 | 688.88965 | 50.1232 |

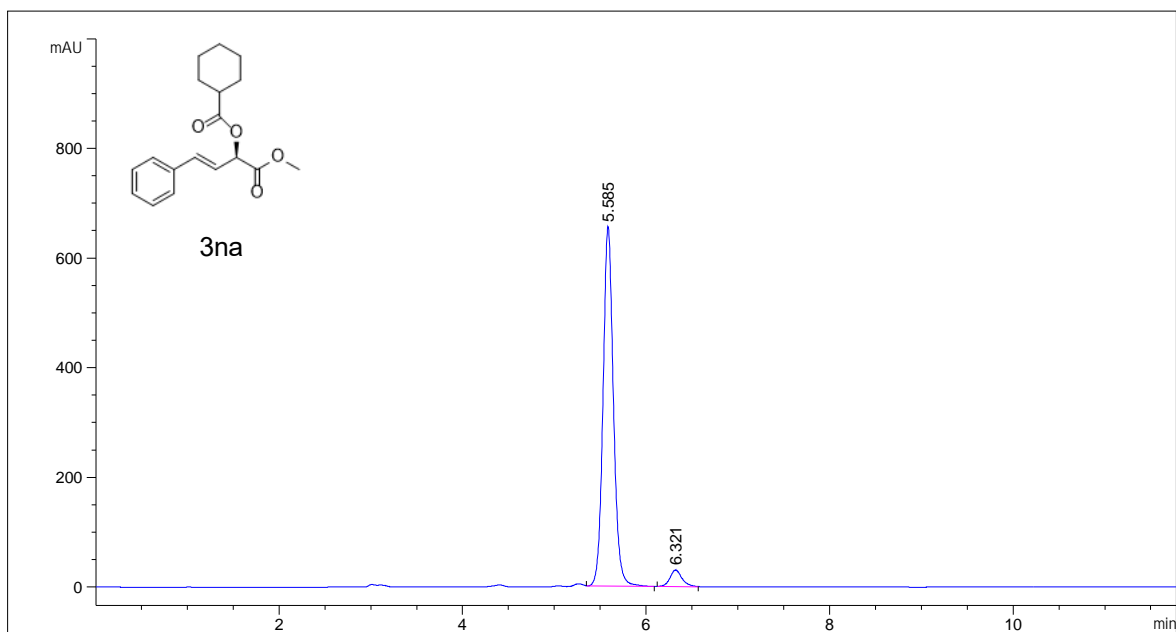

| # | [min]    | [min]  | [mAU*s]    | [mAU]     | %       |
|---|----------|--------|------------|-----------|---------|
| 1 | 5.585 MM | 0.1310 | 5160.92969 | 656.56628 | 94.8532 |
| 2 | 6.321 MM | 0.1539 | 280.03644  | 30.32376  | 5.1468  |

Daicel Chiralpak IA column, n-hexane/i-PrOH= 90/10, flow rate= 1ml/min, l= 225 nm

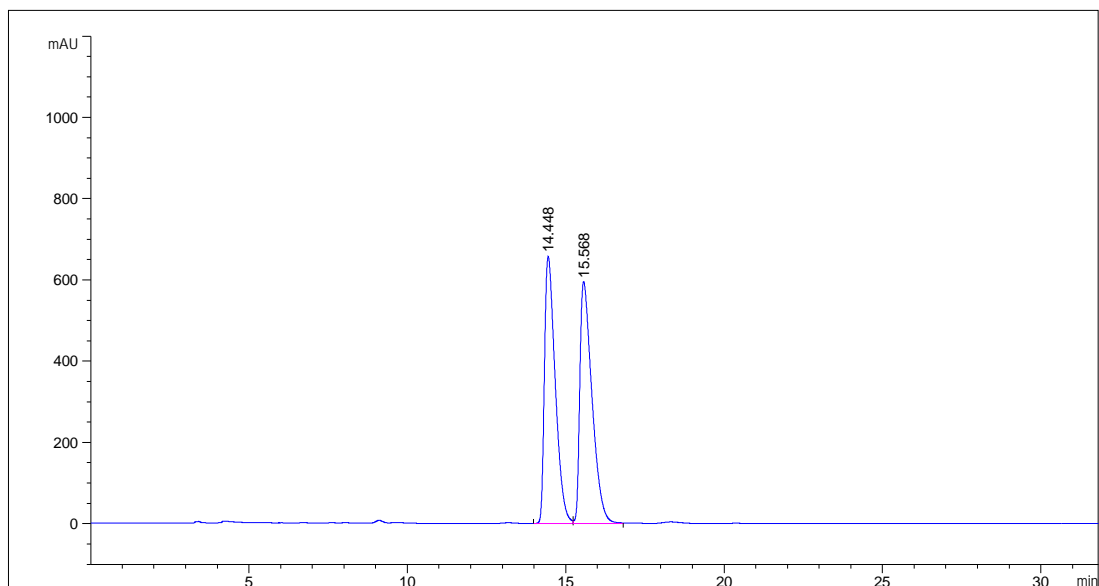

| # | [min]  | [min] | [mAU*s] | [mAU]     | %         |         |
|---|--------|-------|---------|-----------|-----------|---------|
| 1 | 14.448 | BV    | 0.3606  | 1.55231e4 | 657.09741 | 49.4890 |
| 2 | 15.568 | MF    | 0.4440  | 1.58437e4 | 594.68665 | 50.5110 |

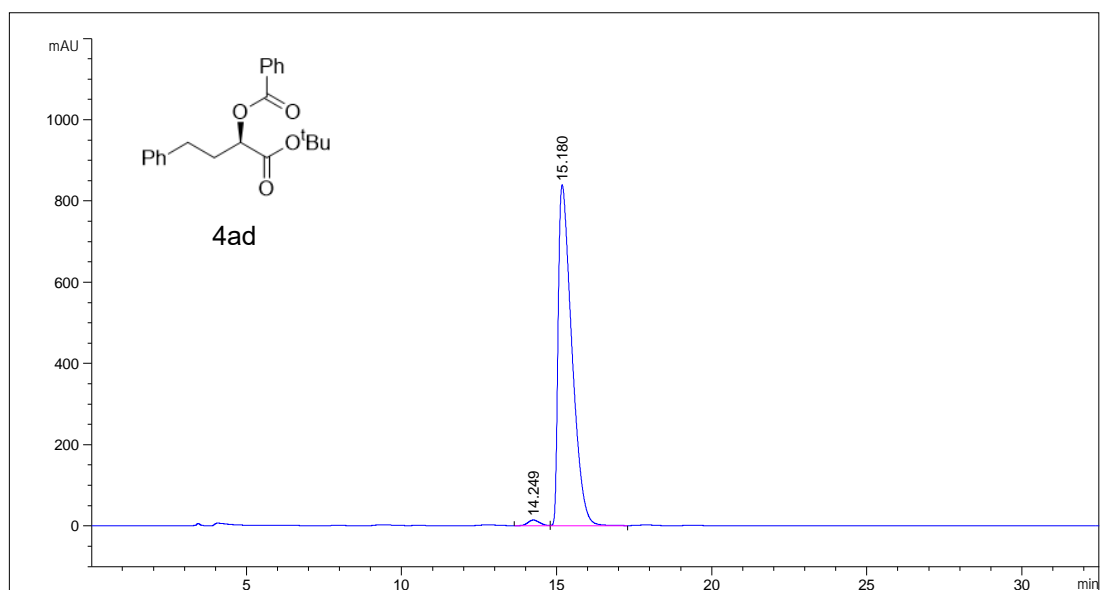

| # | [min]  | [min] | [mAU*s] | [mAU]     | %         |         |
|---|--------|-------|---------|-----------|-----------|---------|
| 1 | 14.249 | BV    | 0.4079  | 360.85562 | 13.89896  | 1.3919  |
| 2 | 15.180 | VB    | 0.4613  | 2.55650e4 | 839.39697 | 98.6081 |

Daicel Chiralpak IA column, n-hexane/i-PrOH= 90/10, flow rate= 1ml/min, l= 225 nm

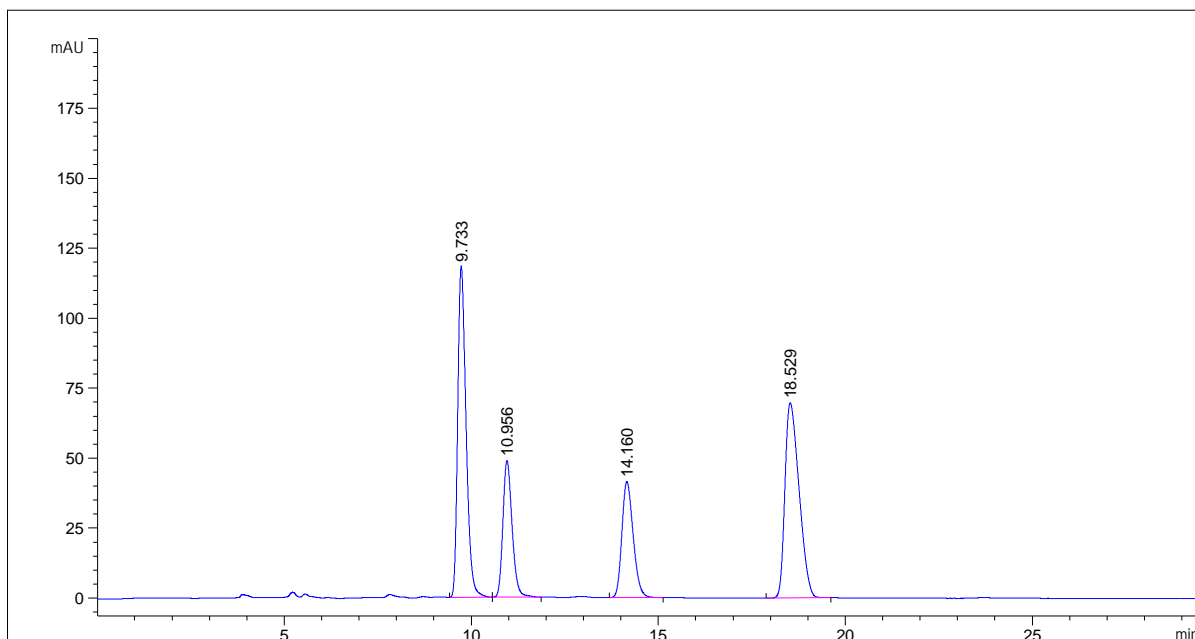

| # | [min]  | [min] | [mAU*s] | [mAU]      | %         |         |
|---|--------|-------|---------|------------|-----------|---------|
| 1 | 9.733  | BB    | 0.2362  | 1819.68066 | 118.48602 | 33.9186 |
| 2 | 10.956 | BB    | 0.2645  | 838.72797  | 48.81547  | 15.6338 |
| 3 | 14.160 | BB    | 0.3267  | 876.62695  | 41.46204  | 16.3402 |
| 4 | 18.529 | BB    | 0.4094  | 1829.80676 | 69.67362  | 34.1074 |

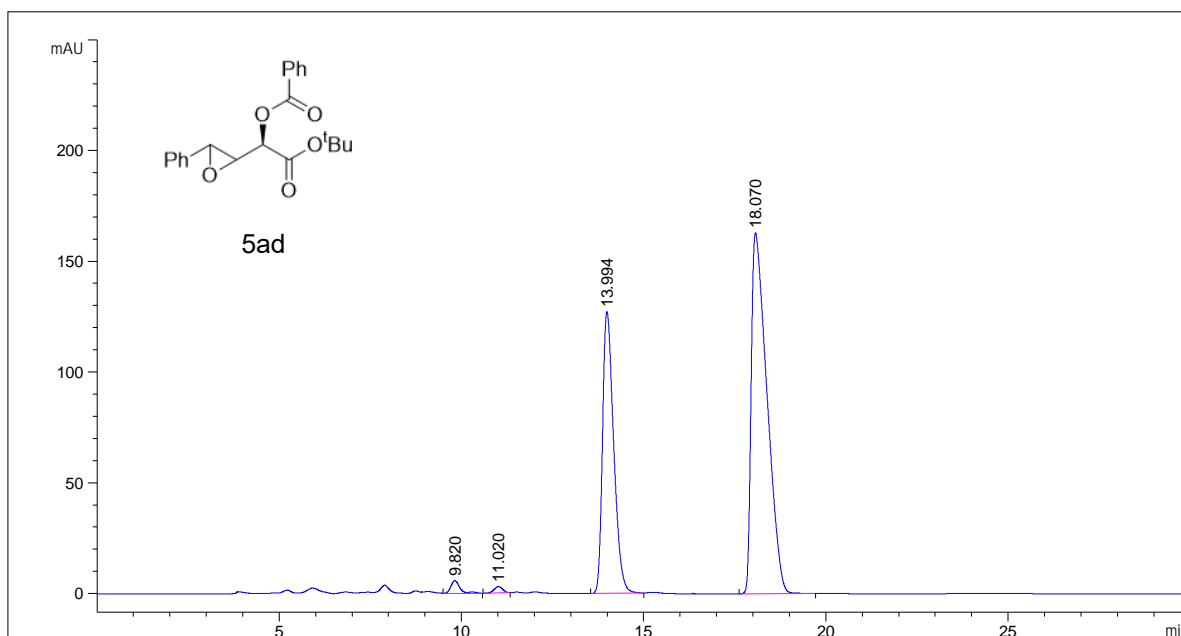

| # | [min]  | [min] | [mAU*s] | [mAU]      | %         |         |
|---|--------|-------|---------|------------|-----------|---------|
| 1 | 9.820  | BV R  | 0.2603  | 97.76487   | 5.69523   | 1.2643  |
| 2 | 11.020 | BB    | 0.2495  | 46.38356   | 2.88594   | 0.5998  |
| 3 | 13.994 | BB    | 0.3259  | 2701.73730 | 127.16734 | 34.9395 |
| 4 | 18.070 | BB    | 0.4658  | 4886.73535 | 162.97511 | 63.1964 |

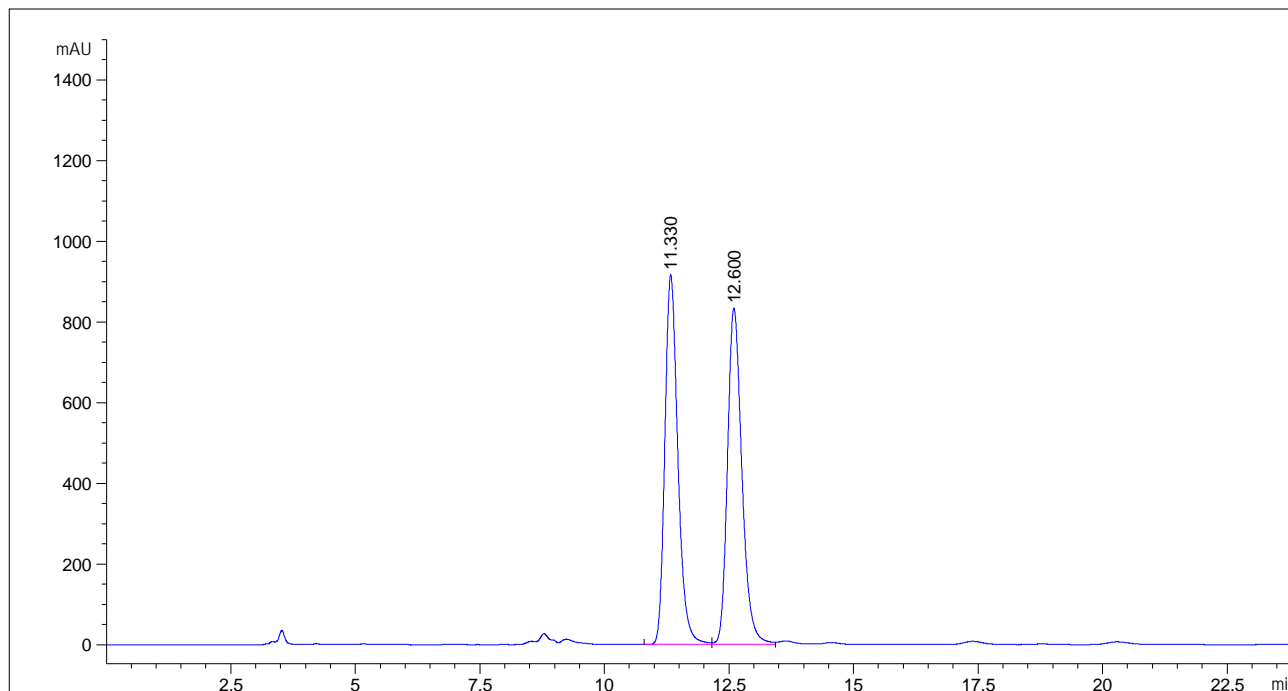

| # | [min]  | [min] | [mAU*s] | [mAU]     | %         |         |
|---|--------|-------|---------|-----------|-----------|---------|
| 1 | 11.330 | BV    | 0.2788  | 1.66289e4 | 915.96826 | 49.7630 |
| 2 | 12.600 | MF    | 0.3355  | 1.67873e4 | 833.96619 | 50.2370 |

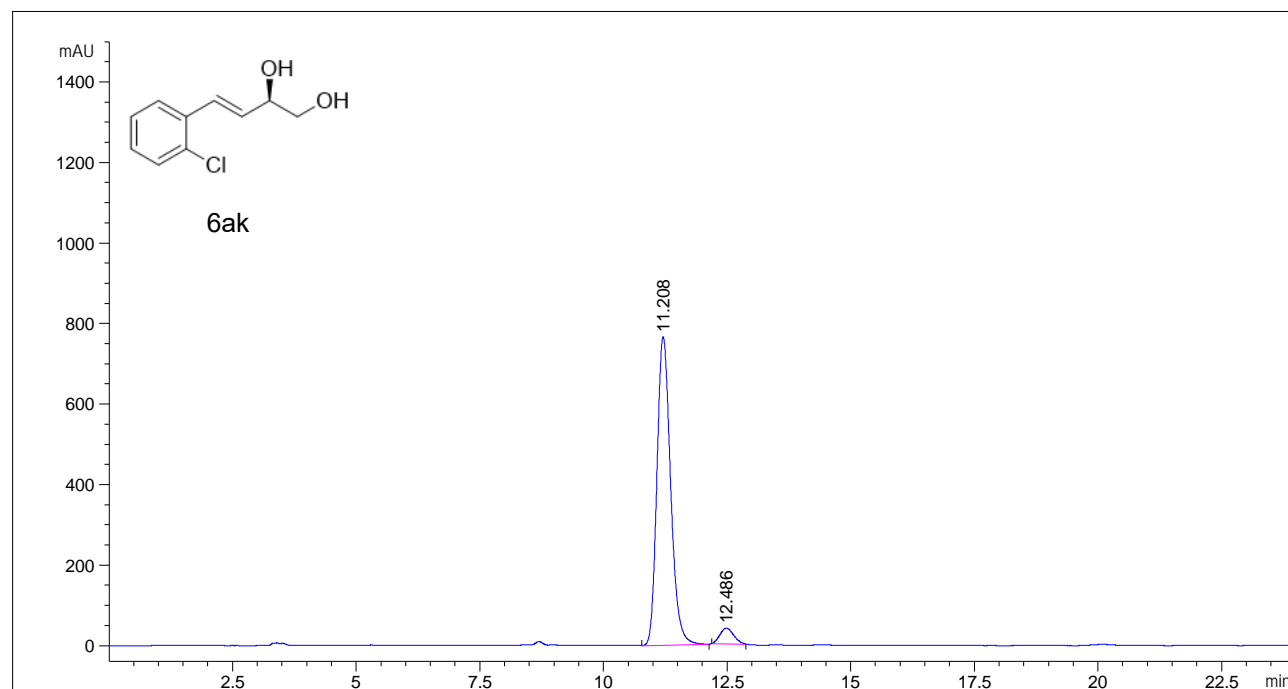

| # | [min]  | [min] | [mAU*s] | [mAU]     | %         |         |
|---|--------|-------|---------|-----------|-----------|---------|
| 1 | 11.208 | MM    | 0.3209  | 1.47702e4 | 767.03333 | 94.9998 |
| 2 | 12.486 | MM    | 0.3276  | 777.40930 | 39.55107  | 5.0002  |

Daicel Chiralpak IA column, n-hexane/i-PrOH= 90/10, flow rate= 1ml/min, I= 225 nm

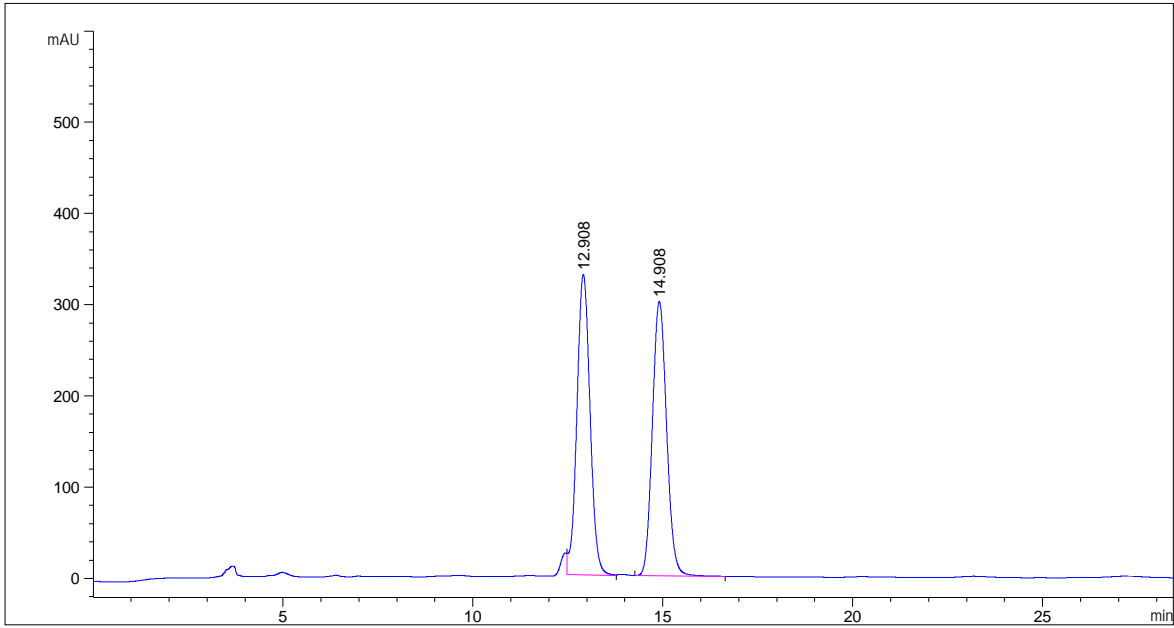

| # | [min]  | [min] | [mAU*s] | [mAU]      | %         |         |
|---|--------|-------|---------|------------|-----------|---------|
| 1 | 12.908 | MM    | 0.4021  | 7944.22461 | 329.31006 | 50.3473 |
| 2 | 14.908 | BB    | 0.4077  | 7834.63916 | 301.00024 | 49.6527 |

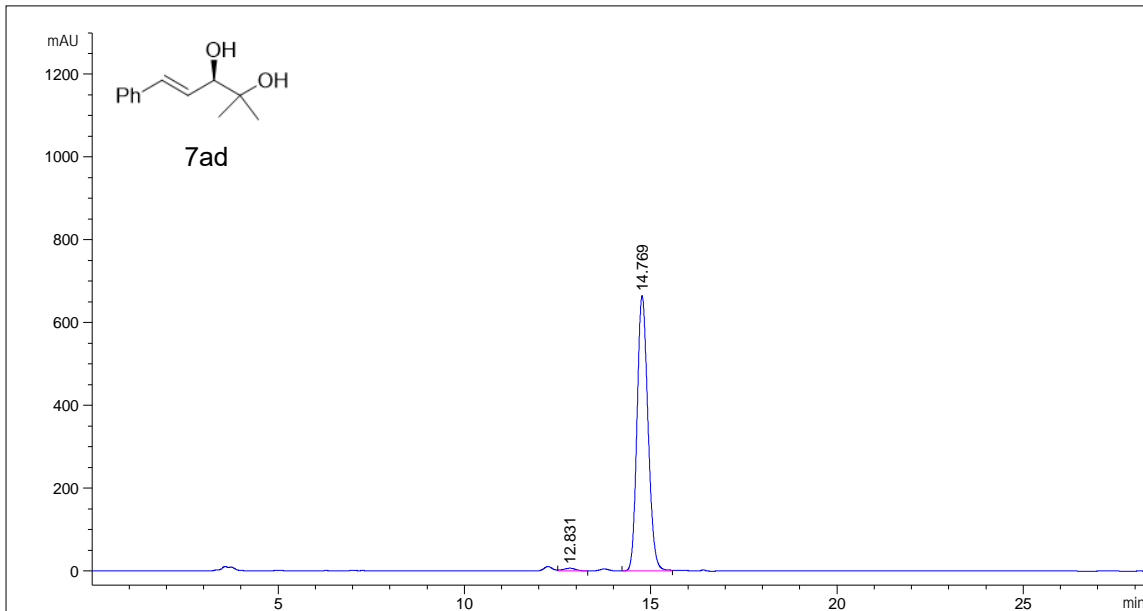

| # | [min]  | [min] | [mAU*s] | [mAU]     | %         |         |
|---|--------|-------|---------|-----------|-----------|---------|
| 1 | 12.831 | VB    | 0.3362  | 142.37741 | 6.38394   | 1.0393  |
| 2 | 14.769 | MF    | 0.3399  | 1.35573e4 | 664.86224 | 98.9607 |

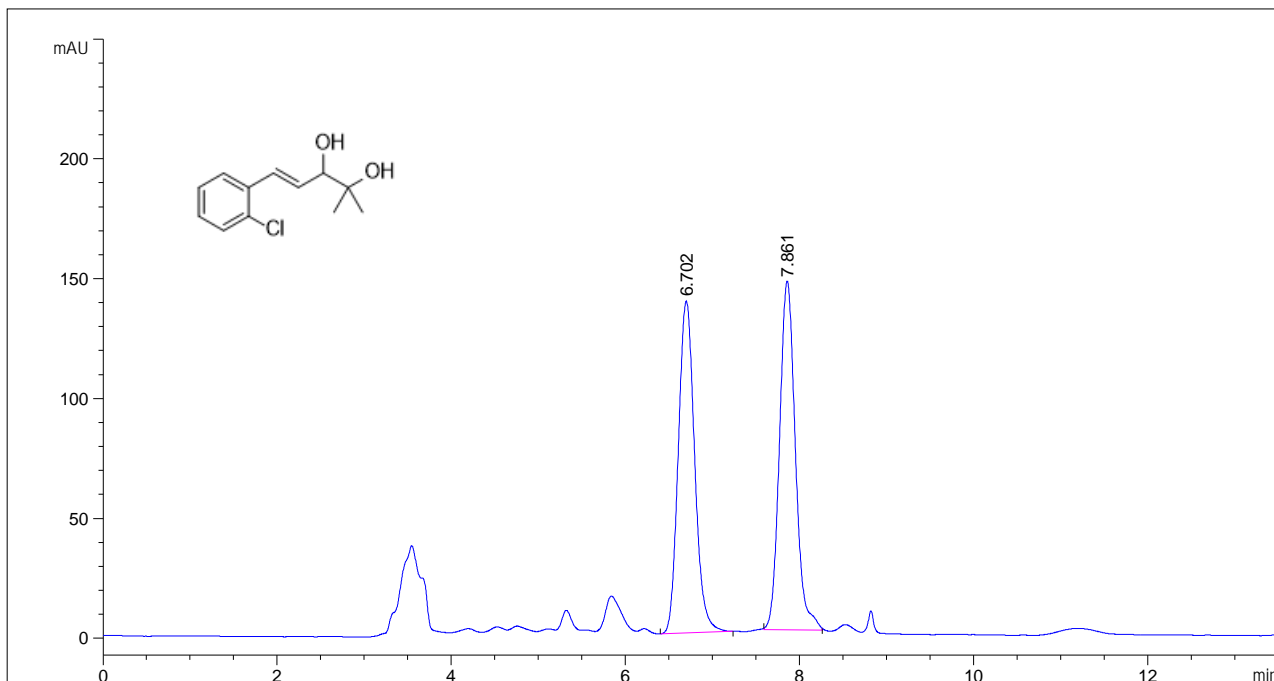

| # | [min] | [min] | [mAU*s]           | [mAU]     | %       |
|---|-------|-------|-------------------|-----------|---------|
| 1 | 6.702 | BB    | 0.2031 1805.69214 | 138.47121 | 49.5248 |
| 2 | 7.861 | MM    | 0.2109 1840.34326 | 145.42366 | 50.4752 |

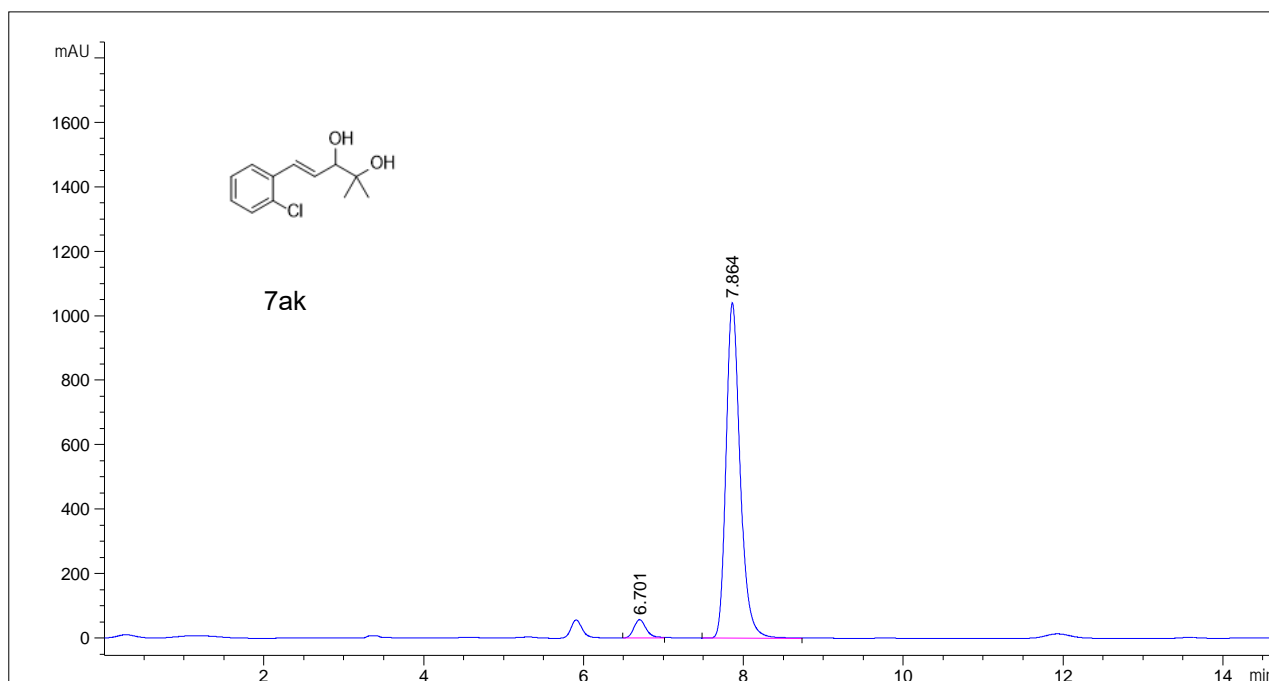

| # | [min] | [min] | [mAU*s]          | [mAU]      | %       |
|---|-------|-------|------------------|------------|---------|
| 1 | 6.701 | MF    | 0.1781 609.90961 | 57.09093   | 4.5461  |
| 2 | 7.864 | MF    | 0.2051 1.28061e4 | 1040.84814 | 95.4539 |
